# Supplementary material for: Transcriptomic analysis of field-droughted sorghum from seedling to maturity reveals biotic and metabolic responses
Source: PubMed Central journal article supplement — Proc Natl Acad Sci U S A. 2019 Dec 5;116(52):27124–32. doi: 10.1073/pnas.1907500116 (PMC6936495; doi:10.1073/pnas.1907500116), 2019-12-05
Supplement: pnas.1907500116.sapp.pdf [file pnas.1907500116.sapp.pdf]

Transcriptomic analysis of field-droughted sorghum from seedling to maturity reveals biotic and metabolic responses.  
Supplementary Appendix

## Contents

|          |                                         |           |
|----------|-----------------------------------------|-----------|
| <b>1</b> | <b>Methods and Materials</b>            | <b>2</b>  |
| <b>2</b> | <b>Supplementary Figures and Tables</b> | <b>10</b> |
| <b>3</b> | <b>Cluster Summaries</b>                | <b>26</b> |
| <b>4</b> | <b>All GO Terms per cluster</b>         | <b>99</b> |

# 1 Methods and Materials

|       |                                                                                   |   |
|-------|-----------------------------------------------------------------------------------|---|
| 1.1   | Experimental protocols . . . . .                                                  | 2 |
| 1.2   | Computational methods . . . . .                                                   | 4 |
| 1.2.1 | Processing of Reads . . . . .                                                     | 4 |
| 1.2.2 | Differential expression analysis . . . . .                                        | 5 |
| 1.2.3 | Clustering . . . . .                                                              | 6 |
| 1.2.4 | Identification of motifs and transcription factors enriched in clusters . . . . . | 7 |
| 1.2.5 | Gene set enrichment analysis in clusters . . . . .                                | 7 |
| 1.2.6 | Identifying shared patterns of expressions . . . . .                              | 7 |
| 1.2.7 | Longitudinal analysis of time course water potential . . . . .                    | 8 |

## 1.1 Experimental protocols

**Design experiment / Field set-up** The field experiments were conducted in Parlier, CA (36.6008°N, 119.5109°W). The fields consist of sandy loam soils with a silky substratum and pH 7.37. We number the weeks according to the dates that plants were sampled. Week 0 was set to be June 1 to coincide with seedling emergence (June 1-3). All plots were pre-watered before planting. Three watering conditions were subsequently used on plots: I) Control, consisting of weekly watering five days before the sampling date, with the first irrigation starting before the sampling of Week 3 (June 18) and continuing until before the sampling of Week 17 (Sept 23) II) Pre-flowering drought, consisting of a complete lack of irrigation up through and including samples from Week 8, at which time regular watering resumed prior to the sampling of Week 9 (July 29), and III) Post-flowering drought, consisting of regular irrigation up through and including irrigation prior to Week 9 sampling (July 29) – at which point over 50% of the plants had reached flowering (anthesis) – and no irrigation after that date (Figure 1a). Plots receiving irrigation were irrigated at seven-day intervals using drip irrigation lines placed on the soil surface of each furrow. When irrigated, plots received 100% of the weekly calculated crop evapotranspiration for the 7 days prior to each irrigation. Crop evapotranspiration was determined based using potential evapotranspiration measured at an on-site CIMIS (CA Irrigation Management Information System) weather station multiplied by the crop coefficient, which was adjusted according to crop growth stage. See Xu *et al* (Xu et al., 2018) for details regarding estimation of evapotranspiration rates, irrigation management, and drought treatment measurements. For pre-flowering droughted plants, the first week in which the droughted plants differed from control in their water exposure when control samples first started receiving water in Week 3, so that Week 3 samples are considered the first samples with pre-flowering drought exposure. The pre-flowering droughted samples collected on Week 9 (Aug 3), 5 days after resumption of water, are the first samples collected pre-flowering droughted plants after they started receiving water. For post-flowering drought, the samples under post-flowering drought collected in Week 10 were collected 12 days after their last irrigation and 5 days after the weekly watering experienced by control plants, and thus are the first samples in post-flowering drought with different water exposure between control and droughted samples, so that Week 10 samples are considered the first samples with post-flowering drought exposure.

The treatment conditions were assigned via a randomized block design, where the fields were divided into 18 plots of 10 rows each (~ 1000 plants per plot). Each plot was randomly assigned a watering treatment (control, pre-flowering drought, or post-flowering drought) and genotype (RTx430 or BTx642), with 3 replicates, for a total of 18 plots. Within each plot individual plant samples of leaves and roots were manually collected weekly on the same day of the week and time of the day. At each week 10 plant samples from each plot were collected, leaves and roots (3<sup>rd</sup> and 4<sup>th</sup> leaves from each plant) separately and then pooled, to create a single leaf and root sample for each plot, except weeks 2-4 where more plants were used per replicate in order to obtain adequate tissue (Supplementary Table 7, 8).

**Sample collection and processing.** Individual sorghum plants were harvested at various developmental stages using a shovel to a depth of approximately 30 cm. Leaf tissue was collected by tearing off the third and fourth fully emerged leaf from the primary tiller, pooling material from 10 representative plants into an aluminum foil bag. The bags were then flash-frozen in liquid nitrogen. Root tissue from the same 10 individuals per sample was collected as previously described (Xu et al., 2018). Briefly, the top 30 cm of

each individual's root system (avoiding brace roots) was cut using garden shears. This root sample consisted almost entirely of mature, differentiated roots with few if any growing root tips, to make this sample type more comparable to leaf tissue harvested at a similar developmental (mature) state. After isolation, roots were vortexed for 2 minutes in epiphyte removal buffer (0.633% NaH<sub>2</sub>PO<sub>4</sub>·H<sub>2</sub>O, 1.65% Na<sub>2</sub>HPO<sub>4</sub>·7H<sub>2</sub>O, adding 200  $\mu$ l Silwet-77/L, following autoclaving) to remove rhizosphere soil, then rinsed twice in root washing buffer, same as epiphyte removal buffer, omitting Silwet-77.

The washed roots were then gently dried, placed in aluminum foil bags, and quickly frozen in liquid nitrogen. Each week, all samples were collected at the same time of day (between 10am and 1pm) and the same day of the week for 16 weeks following seedling emergence (Week 2 to Week 17).

**RNA extraction and sequencing.** Harvested and frozen root and leaf tissue were ground in a cryogenic Freezer Mill (SPEX SamplePrep 6875D, Metuchen NJ USA) for 2-3 cycles of 2-3 minutes, with 1 minute cooling in between. Samples were then stored at -80°C. RNA was extracted using the QIAGEN miRNeasy Mini Kit (Cat. #AM217004) with modifications: 1 mL QIAzol (Cat #AM217004) and 100  $\mu$ L 10% Sarkosyl solution were added to 100 mg of frozen tissue and placed in a vortex shaker adapter for 5 minutes. To these, 200  $\mu$ L chloroform was added, and the samples were then vortexed and incubated for 3 minutes at room temperature before centrifugation at 12,000 xg for 15 minutes at 4°C. The aqueous phase was then transferred to a fresh tube, and ethanol was added to a final concentration of 60%. The remaining procedure was performed according to the kit manufacturer's recommendations. DNA contamination was removed from each sample using the TURBO DNA-free kit, (Cat. #AM1907, Invitrogen) according to the manufacturer's recommendations. Stranded cDNA libraries were generated using the Illumina Truseq Stranded RNA LT kit. mRNA was purified from 1  $\mu$ g of total RNA using magnetic beads containing poly-T oligos. mRNA was fragmented and reversed transcribed using random hexamers and SSII (Invitrogen) followed by second strand synthesis. The fragmented cDNA was treated with end-pair, A-tailing, adapter ligation, and 8 cycles of PCR. qPCR was used to determine the concentration of the libraries. Libraries were sequenced on the Illumina HiSeq.

**Protein extraction and western blotting** For isolation of total protein, ground control and post-flowering drought leaf tissue from Week 11 was vigorously resuspended in a solution of 0.1 M EDTA pH 8.0, 0.12 M Tris-HCl pH 6.8, 0.1 M Na<sub>2</sub>CO<sub>3</sub>, 4% SDS, 12% sucrose, 0.2 M DTT, and 8 M Urea, and incubated in the dark at room temperature for 60 min. Tissue was pelleted and the proteinaceous supernatant was isolated. Total chlorophyll content of the supernatant was quantified as described (Porra et al., 1989). 2  $\mu$ g of chlorophyll were loaded for each sample, excluding the 75% (1.5  $\mu$ g), 50% (1  $\mu$ g) and 25% (0.5  $\mu$ g) dilution series. Proteins were resolved using pre-cast SDS-PAGE Any KD™ gels (BIO-RAD) and transferred to a polyvinylidene difluoride membrane (Immobilon-FL 0.45 mm, Millipore) via semi-dry transfer for immunodetection. Polyclonal antibodies raised against AtpB, PsaA, D1 (DE-loop), CP47, and Cyt b6 were obtained from Agrisera (Sweden) and visualized using the Western Lightning Plus-ECL chemiluminescent substrate system (PerkinElmer).

**Spectrophometric metabolite and enzyme assays** Proline was extracted from ground, frozen leaf tissue by boiling in 80% ethanol for 5 min. Material was pelleted, the supernatant removed, and then resuspended in 80% ethanol and boiled again. The second supernatant was combined with the first and then lyophilized to remove all ethanol. Following lyophilization, water-soluble molecules were separated from insoluble molecules by centrifuging and transferring the cleared supernatant to a new tube. Proline levels per unit fresh weight were quantified using a ninhydrin spectrometric assay (Bates et al., 1973).

Bulk glutathione S-transferase activity was measured using a 1-chloro-2,4-dinitrobenzene (CDNB) assay (Habig et al., 1974). Soluble proteins were extracted from ground, frozen leaf tissue by vortexing in 50 mM HEPES pH 7.5, 10% glycerol, 0.1% Triton X-100, 1 mM EDTA, 1 mM EGTA, 1 mM DTT, 10 mM MgCl<sub>2</sub>, and complete protease inhibitors (Roche) (Gibon et al., 2004). Total soluble protein was measured using a Bradford assay.

**Leaf and root respiration measurements** Respiration rates for leaves with no treatment and only leaves treated with 2.5 mM KCN were measured using a Clark-type oxygen electrode (Hansatech). Unlike all of

the other experimental validation described here, the respiration rates for the leaf samples were measured on different samples from those used for the mRNA-Seq experiment because of the need for fresh material; these samples were collected from sorghum grown in the same field as the plants in the mRNA-Seq experiments, but in a different year. Fresh material was dark-adapted for over 1 hour and then dissected into pieces smaller than 5 mm and placed into air-saturated 20 mM MES, 20 mM HEPES pH 6.6, 0.2 mM CaCl<sub>2</sub> with stirring and nylon mesh to prevent the plant material from contacting the electrode (Yoshida et al., 2007). We found that an effect of 2.5 mM KCN on leaves could only be observed when the cuticle was first damaged using sand paper. Respiration rates were collected over 5 min or longer when steady-state was not reached in the first 5 min.

**High Performance Liquid Chromatography analysis of total chlorophyll** Chlorophyll a and b levels were quantified by HPLC (1100 HPLC, Agilent) as described through a chlorophyll and carotenoid quantification procedure (Baroli et al., 2003), and were normalized by ground tissue weight. Frozen ground leaf tissue was weighed then mixed with 200  $\mu$ l 100% HPLC-grade acetone. To extract most pigments, ground tissue was further pulverized in the acetone with lysing Matrix D beads through a FastPrep-24 5G™ High-Speed Homogenizer (6.5 m s<sup>-1</sup> for 2 x 60 s, MP Biomedical). Acetone supernatant was collected after centrifugation (2 min, 1500 g, 4°C). Extraction was repeated until the acetone extract was nearly clear to ensure full pigment extraction. Samples were held on ice in the dark throughout the extraction process to prevent pigment degradation.

**Total fungal abundance (qPCR) & estimated AM fungal abundance** A detailed description of the protocol used for measuring total fungal abundance can be found in our paper of sorghum mycobiome (Gao et al, in preparation). Briefly, fungal abundance was estimated by quantitative PCR (qPCR) of the fungal small subunit rRNA (SSU or 18S) using the FF2 and FR1 primers (Zhou et al., 2000). Analysis of qPCR mixtures was accomplished using a Real-Time PCR Detection System (Bio-Rad, Hercules, CA, USA) containing 1  $\mu$ l of 5ng/ $\mu$ l genomic DNA, 10k $\mu$ l iTAQ SYBR Green Supermix with ROX (Bio-Rad, Hercules, CA, USA), 0.2  $\mu$ l of 100 mg ml<sup>-1</sup> BSA, 0.15  $\mu$ l of each 50  $\mu$ M primer and water to 20  $\mu$ l (Adams et al., 2013). Thermal cycling conditions consisted of an initial denaturation at 95°C for 3 min, followed by 40 cycles of 15 s of denaturation at 95°C and 1 min of annealing and extension at 60°C, finishing with a dissociation stage of 95°C for 15 s, 60°C for 30 s and 95°C for 15 s (Adams et al., 2013). Standard curves were developed using a series of 10-fold dilutions of plasmids containing a fragment of an insert of the 18S gene of *Penicillium purpurogenum* (Adams et al., 2013).

Let  $q_{\text{TOTAL}}(t)$  be the total fungal abundance estimated with qPCR,  $p_{\text{AMF}}(t)$  be the relative AM to all fungi abundance estimated with the 18S data. The estimated log<sub>2</sub> abundance of AM fungi  $q_{\text{AMF}}(t)$  is computed as follows:

$$q_{\text{AMF}}(t) = q_{\text{TOTAL}}(t) + \log_2(p_{\text{AMF}}(t))$$

## 1.2 Computational methods

### 1.2.1 Processing of Reads

**Reference Genomes** To increase read mapping rates for transcriptomic data, we generated custom SNP-corrected reference genome sequences for the two strains used in this study. We performed whole genome shotgun sequencing of DNA from each of the two strains (Tx642 or RTx430). We identified genome-wide SNPs between the sample and *Sorghum bicolor* v3.0 reference using samtools 0.1.19, then filtered with vcftools v 0.1.12a at default settings and for a maximum depth of 3 x average depth of the samples. After discarding indels, the remaining SNP calls were applied to the *Sorghum bicolor* v3.0 reference via bcftools consensus function to generate a custom reference sequence for each strain. These sequences are available at <https://www.stat.berkeley.edu/~epicon/publications/rnaseq/><sup>1</sup>.

<sup>1</sup>This page is currently password protected and will be made public upon acceptance. login: reviewer ; password: epicon

**Transcriptomic sequence data analysis pipeline** Raw fastq file reads were filtered and trimmed using the JGI QC pipeline resulting in the filtered fastq file (\*.filter-RNA.gz files). Using BBDuk (bbduk), raw reads were evaluated for artifact sequence by kmer matching (kmer=25), allowing 1 mismatch and detected artifact was trimmed from the 3' end of the reads. RNA spike-in reads, PhiX reads and reads containing any Ns were removed. Quality trimming was performed using the phred trimming method set at Q6. Finally, following trimming, reads under the length threshold were removed (minimum length 25 bases or 1/3 of the original read length - whichever is longer).

Filtered reads from each library were aligned to the reference genome (phytozome v3.1, supplemented with RTx430 and BTx642 SNP information) using HISAT version 2.1.0 (Kim et al., 2015) (BAMs/ directory). featureCounts (Liao et al., 2014) was used to generate the raw gene counts (counts.txt) file using gff3 annotations. Only primary hits assigned to the reverse strand were included in the raw gene counts (-s 2 -p -primary options).

**Quality analysis and transformation of RNA-Seq data** We performed quality analysis on the raw data and removed one sample of low-quality (low correlation to its replicates). We then applied the following normalization procedure: we filtered out low expressed genes and retained genes containing at least 20 reads in at least 3 samples and then applied upper-quartile normalization on the resulting set of genes to normalize using EDA-Seq (Bullard et al., 2010; Risso et al., 2011).

### 1.2.2 Differential expression analysis

**Identifying genes differentially expressed across the time-course experiment** We modeled the gene expression of gene  $i$  as a smooth function over time, with a different functional form estimated for each combination of genotype and watering condition.

Let  $y_{ij}$  be the log-expression level of gene  $i$  in sample  $j$  observed at time  $t_j$ , and  $C_j$  be the watering and genotype combination of a sample  $j$  (taking on six possible values for the three watering conditions and two genotypes). In what follows, we will drop the index  $i$  for gene, unless needed for clarity. We modeled the gene expression of sample  $j$  as:

$$y_j = g_{C_j}(t_j) + \epsilon_j, \quad (1)$$

where  $g_C(t)$  is the smooth mean expression across time for the watering/genotype combination  $C$ , and  $\epsilon_j$  are independent random variables with mean zero and variance  $\sigma_j^2$ .

We estimated the functional gene expression  $g_C(t)$  for each combination  $C$  with B-splines basis (De Boor, 2001) separately for each sample type (leaf or root) and condition (pre- or post-flowering drought) using the package edge in R Storey et al. (2005). To accommodate the shift in expression at time  $T$  when there are watering changes – either water is re-established (pre-flowering drought,  $T = 9$ ) or when drought commences (post-flowering drought,  $T = 10$ ) – we estimated a different spline function on either side of  $T$ , which we refer to as a split-spline, so that the functional curve  $g_C(t)$  can be written as follows:

$$g_C(t) = \begin{cases} \alpha_C^- + \sum_l \beta_{lC}^- \Phi_l(t) & \text{for } t < T \\ \alpha_C^+ + \sum_l \beta_{lC}^+ \Phi_l(t) & \text{for } t \geq T \end{cases}, \quad (2)$$

where  $\Phi_l$  are B-splines basis of degree 3 with 3 degrees of freedom. This functional form captures both the smooth changes in gene expression from week to week, and the abrupt changes due to watering changes.

To allow for flexible comparisons of different treatments, we then extend the model implemented in edge Storey et al. (2005) to test hypotheses regarding linear combinations (contrasts) of the spline functions. We considered four different contrasts to identify the genes that are differentially expressed for the different possible comparisons of interest.

- 1. Drought versus Control** For each genotype and drought regime, we tested if the functional gene expression was different between the watered and droughted conditions. The null hypotheses can be written for each genotype  $G$ :

$$H_0 : g_{\text{Dght}:G}(t) = g_{\text{Cntrl}:G}(t),$$

where “Dght” refers to one of the drought condition and “Cntrl” the control condition. Because there are two drought regimes (pre- and post-flowering drought) and two genotypes, this defines four separate contrasts each for leaf and root samples.

2. **Constitutive Genotype differences** We compared the functional gene expression for the two genotypes under watered conditions with the following null hypothesis:

$$H_0 : g_{\text{Dght:RTx430}}(t) = g_{\text{Cntrl:BTx642}}(t)$$

3. **Genotype-specific drought responses** For each drought regime, we tested whether the change in gene expression due to drought is the same in the two genotypes.

$$H_0 : g_{\text{Cntrl:RTx430}}(t) - g_{\text{Dght:RTx430}}(t) = g_{\text{Cntrl:BTx642}}(t) - g_{\text{Dght:BTx642}}(t).$$

**Identifying genes differentially expressed in specific weeks.** We primarily relied on our holistic estimates of differential expression found using the functional splines methods. However, we also evaluated the number of genes differentially expressed in the first weeks of drought. To accomplish this, we used limma (Law et al., 2014) for differential expression (DE) analysis with the individual time points as factors in addition to our treatment combination ( $C$ ) in the model, resulting in estimates of  $\theta_C(t)$ , the mean expression at week  $t$  for the combination  $C$  in the limma factorial model. We then isolated effects using similar contrasts as described above only applied to  $\theta_C(t)$  in order to (1) identify genes DE between drought and control in a single week; (2) identify genes differentially expressed between the two genotypes with respect to drought in a single week. We also considered an additional contrast to identify genes whose expression abruptly changes between watering changes (either water resumption for pre-flowering or commencement of drought for post-flowering). We call this a “water change” analysis and test the following contrast:

$$H_0 : \theta_{\text{Cntrl:G}}(t-1) - \theta_{\text{Cntrl:G}}(t) = \theta_{\text{Dght:G}}(t-1) - \theta_{\text{Dght:G}}(t),$$

where  $t = 9$  for pre-flowering drought and  $t = 10$  for post-flowering drought.

**Computing a log-fold change across a time-course experiment** To obtain a log-fold change between droughts across the whole time-course experiment, we first computed the log fold change using estimates from limma (Law et al., 2014) for each time point of the time-course experiment, obtaining a vector  $L_i \in \mathbb{R}^T$  for each gene  $i$ . Then, we applied the following formula:

$$\text{lfc}_i = \text{sign} \left( \frac{1}{T} \sum_{t=1}^T L_i^t \right) \times \left( \frac{1}{T} \sum_{t=1}^T |L_i^t| \right). \quad (3)$$

### 1.2.3 Clustering

We then applied a clustering strategy to group genes on their gene expression patterns. We performed this clustering routine separately for the four different combinations of sample types (leaf/root) and the drought conditions (pre- versus post-flowering droughted plants); note that control samples were used in defining the gene clusters for both the pre-flowering clusters and the post-flowering clusters.

First, we calculated the Fisher’s combined probability (Fisher, 1925) based on the unadjusted p-values from three of the across-time DE analyses (drought versus control in RTx430, drought versus control in BTx642, and genotype-specific drought response) as well as the unadjusted p-value from the “water change” analysis. We then ranked the genes by their Fisher’s combined probability. We selected the 5000 genes with the lowest Fisher’s p-value, and that had a log fold change of at least 2 in at least a week. We then fitted a split-spline function to each gene and each condition, using Equation 2, to get estimates  $\hat{g}_{iC}(t)$  for each watering condition and genotype combination, and gene  $i$ . For each genotype  $G$  we rescaled  $\hat{g}_{i\text{Dght:G}}(t)$  and  $\hat{g}_{i\text{Ctrl:G}}(t)$  by the same shift and scale constant per gene such that the functions range between 0 and 1; each genotype, however, was allowed separate rescaling constants to allowing clustering together genes with different levels of expression, but similar patterns in the two genotypes. Finally, we then applied k-means to the resulting fitted values at timepoints  $t_j$ ,  $\hat{g}_{iC}(t_j)$ , with the number of clusters  $K$  set to 20 for pre-flowering drought stress, and 10 for post-flowering drought stress. We define for each cluster  $k$  and condition  $C$  the centroid at a time point  $t_j$ ,  $\hat{\mu}_k(t_j)$ , as the average across the genes in the cluster of of the rescaled fitted values  $\hat{g}_{iC}(t_j)$ . This results in 60 centroid vectors.

**Assigning a clustering score and label to all genes** For each cluster  $k$ , we assigned a score to every gene that passed our expression cutoff (i.e. not only those used in defining the clusters) that determines its fit to the cluster centroid vector  $\hat{\mu}_k$ , given by the following:

$$S(g, \hat{\mu}_k) = \frac{1}{S_0(k)} \times \min_{a_{iG_j}, b_{iG_j}} \sum_j (b_{iG_j} y_{ij} + a_{iG_j} - \hat{\mu}_k(t_j))^2, \quad (4)$$

where  $a_{iG} \geq 0$  and  $b_{iG}$  are scalars chosen per genotype that best rescale the gene’s expression values  $y_{ij}$ , like that of the centroid  $\hat{\mu}_k(t)$ , and

$$S_0(k) = \min_{a_{0G_j}} \sum_j (a_{0G_j} - \hat{\mu}_k(t_j))^2,$$

to enforce the score  $S(g, k)$  to be between 0 and 1. Note that the score is independent of the scale of the centroid and the scale of the gene.

We computed a score for each gene and each centroid and assign genes to the cluster that minimizes the score  $S(g, \hat{\mu}_k)$ . We then separate the genes into “good” and “poor” matches, considering the top 50% percentile score over the whole set of clusters jointly between leaf and root as “good matches.”

**Visualizing cluster centroids** For visualization of the cluster centroids, we fitted a split-spline to the centroid values,  $\hat{\mu}_k(t_j)$ , along with 20 and 80% percentile bands. To compute percentile bands, we use the estimates of  $a_{iG}$  and  $b_{iG}$  from Equation 4, and rescale the expression values  $y_{ij}$  for all “good-matched” genes  $i$  in cluster  $k$ . We then estimated the lower and higher bands by fitting a split-spline function onto the 20% and 80% percentile of the rescaled expression values.

#### 1.2.4 Identification of motifs and transcription factors enriched in clusters

**Annotating transcription factors** We created a manually curated set of PFAM that are good predictors for the gene families defined in O’Malley et al. (2016) for Arabidopsis. We then used this mapping from PFAM to transcription families to annotate further the putative transcription factors from GrassTFDB.

**Motif enrichment analysis** We performed motif enrichment analysis in the promoters of each cluster. We considered the 500 bp downstream of each gene to be the promoter regions. For each cluster, we constructed a promoter sequence file, composed of promoter sequences of the “good-matched” genes of the cluster and a background file, composed of promoter sequences of “good-matched” genes from other clusters. We applied MEME-AME McLeay and Bailey (2010), using as *a priori* motifs of interest the database from O’Malley et al. (2016).

#### 1.2.5 Gene set enrichment analysis in clusters

To facilitate interpretation of clusters, we performed KEGG pathway enrichment analysis and GO term enrichment analysis on the set of “good-matched” genes from each cluster independently from one another. To perform KEGG pathway enrichment analysis, we applied the R package `KEGGprofile`, which uses a hypergeometric tests to detect significant pathways. To detect GO terms highly enriched in each cluster, we applied gene set enrichment analysis (GSEA Subramanian et al. (2005)), which uses a Fisher test to detect significant GO terms. We then corrected for multiple tests using Benjamini-Hochberg.

#### 1.2.6 Identifying shared patterns of expressions

The above enrichment analysis only detects enrichment of significant genes in functional gene sets, but does not imply that their temporal patterns are coordinated. To detect shared patterns of gene expression profile in a geneset, we applied an iterative method to identify inliers, by modifying the random sample consensus algorithm (RANSAC). RANSAC is widely used in vision to detect inliers, a set of data points whose distribution can be explained by a model with a fixed set of parameters, from outliers (data points that do not fit this model) (Fischler and Bolles, 1987). Let  $\mathcal{G}$  be the geneset of interest,  $\tau$  be a pre-defined threshold,  $m$  a pre-defined number of genes, and  $N$  the number of trials to consider. The procedure is as follows: for each iteration  $\ell$ ,

1. Select a random subset of genes  $\mathcal{G}_\ell$  of size  $m$ , and estimate the set of mean centroids  $\hat{\boldsymbol{\mu}}_\ell$  by the same procedure as in the clustering.
2. For all genes in the complete set  $\mathcal{G}$ , compute a score  $S(g_i, \hat{\boldsymbol{\mu}}_\ell)$ , as defined above in Equation 4 for scoring genes to clusters. Define  $I_\ell$  to be the set of in-liers for trial  $\ell$  as all genes with a score lower than the pre-defined threshold  $\tau$ .

Once the pre-defined number of random trials has been reached, define the final set of inliers  $I_{\text{inlier}}$  as the largest set found through this procedure.

We applied this procedure with  $\tau = 0.5$ ,  $N = 1000$ ,  $m = \max(10, 0.3|\mathcal{G}|)$  on all gene sets defined by KEGG pathways, as well as pre-specified GO terms and gene sets of interest (total of 389 gene sets: 22 transcription factors families, 80 GO terms, 270 KEGG pathways, and 17 manually created gene sets of interest). We then rank these gene sets based on the proportion of their genes that are in  $I_{\text{inlier}}$ . Supplementary Table 9 shows all of those gene sets with proportions of in-liers greater than 50% of the gene set.

### 1.2.7 Longitudinal analysis of time course water potential

Let  $w_s$  be the  $s$ -th measurement water potential at time  $t_s$ , for replicate  $r_s$ , and  $C_s$  be the watering conditions, depth (6, 12, and 24 inches), and genotype combination of the measurement. In this analysis, we only considered measurements under drought conditions (before July, 28th for preflowering drought and after July, 28th for postflowering drought). Note that the water potential measurements are repeated observations of the same plot. We modeled the water potential as:

$$w_s = \mu_{C_s}(t_s) + \gamma_{r_s}(t_s) + \epsilon_s, \quad (5)$$

We modeled the average time curve water potential  $\mu_{C_s}$  as a linearly related to time, with replicates deviating from the average time curve by a random effect intercept and slope through  $\gamma_{r_s}(t_s)$ . We fitted this model separately for pre- and post-flowering, using `lmer` (Bates et al., 2015), and performed significance testing on the slope of the models using `multcomp` (Hothorn et al., 2008).

## References

- Bbduk.
- Adams, R. I., Miletto, M., Taylor, J. W., and Bruns, T. D. (2013). Dispersal in microbes: fungi in indoor air are dominated by outdoor air and show dispersal limitation at short distances. *ISME J*, 7(7):1262–1273.
- Baroli, I., Do, A. D., Yamane, T., and Niyogi, K. K. (2003). Zeaxanthin accumulation in the absence of a functional xanthophyll cycle protects *Chlamydomonas reinhardtii* from photooxidative stress. *Plant Cell*, 15(4):992–1008.
- Bates, D., Mächler, M., Bolker, B., and Walker, S. (2015). Fitting linear mixed-effects models using `lme4`. *Journal of Statistical Software*, 67(1):1–48.
- Bates, L. S., Waldren, R. P., and Teare, I. D. (1973). Rapid determination of free proline for water-stress studies. *Plant and Soil*, 39(1):205–207.
- Bullard, J. H., Purdom, E., Hansen, K. D., and Dudoit, S. (2010). Evaluation of statistical methods for normalization and differential expression in mRNA-Seq experiments. *BMC Bioinformatics*, 11:94.
- De Boor, C. (2001). *A practical guide to splines; rev. ed.* Applied mathematical sciences. Springer, Berlin.
- Fischler, M. A. and Bolles, R. C. (1987). Readings in computer vision: Issues, problems, principles, and paradigms. chapter Random Sample Consensus: A Paradigm for Model Fitting with Applications to Image Analysis and Automated Cartography, pages 726–740. Morgan Kaufmann Publishers Inc., San Francisco, CA, USA.
- Fisher, R. (1925). *Statistical methods for research workers.* Edinburgh Oliver & Boyd, Edinburgh.



- Gibon, Y., Blaesing, O. E., Hannemann, J., Carillo, P., Hohne, M., Hendriks, J. H., Palacios, N., Cross, J., Selbig, J., and Stitt, M. (2004). A Robot-based platform to measure multiple enzyme activities in Arabidopsis using a set of cycling assays: comparison of changes of enzyme activities and transcript levels during diurnal cycles and in prolonged darkness. *Plant Cell*, 16(12):3304–3325.
- Habig, W. H., Pabst, M. J., and Jakoby, W. B. (1974). Glutathione S-transferases. The first enzymatic step in mercapturic acid formation. *J. Biol. Chem.*, 249(22):7130–7139.
- Hothorn, T., Bretz, F., and Westfall, P. (2008). Simultaneous inference in general parametric models. *Biometrical Journal*, 50(3):346–363.
- Kim, D., Langmead, B., and Salzberg, S. L. (2015). HISAT: a fast spliced aligner with low memory requirements. *Nat. Methods*, 12(4):357–360.
- Law, C. W., Chen, Y., Shi, W., and Smyth, G. K. (2014). voom: Precision weights unlock linear model analysis tools for RNA-seq read counts. *Genome Biol.*, 15(2):R29.
- Liao, Y., Smyth, G. K., and Shi, W. (2014). featureCounts: an efficient general purpose program for assigning sequence reads to genomic features. *Bioinformatics*, 30(7):923–930.
- McLeay, R. C. and Bailey, T. L. (2010). Motif Enrichment Analysis: a unified framework and an evaluation on ChIP data. *BMC Bioinformatics*, 11:165.
- O’Malley, R. C., Huang, S. C., Song, L., Lewsey, M. G., Bartlett, A., Nery, J. R., Galli, M., Gallavotti, A., and Ecker, J. R. (2016). Cistrome and Epicistrome Features Shape the Regulatory DNA Landscape. *Cell*, 166(6):1598.
- Porra, R., Thompson, W., and Kriedemann, P. (1989). Determination of accurate extinction coefficients and simultaneous equations for assaying chlorophylls a and b extracted with four different solvents: verification of the concentration of chlorophyll standards by atomic absorption spectroscopy. *Biochimica et Biophysica Acta (BBA) - Bioenergetics*, 975(3):384 – 394.
- Risso, D., Schwartz, K., Sherlock, G., and Dudoit, S. (2011). GC-content normalization for RNA-Seq data. *BMC Bioinformatics*, 12:480.
- Storey, J. D., Xiao, W., Leek, J. T., Tompkins, R. G., and Davis, R. W. (2005). Significance analysis of time course microarray experiments. *Proceedings of the National Academy of Sciences of the United States of America*, 102(36):12837–42.
- Subramanian, A., Tamayo, P., Mootha, V. K., Mukherjee, S., Ebert, B. L., Gillette, M. A., Paulovich, A., Pomeroy, S. L., Golub, T. R., Lander, E. S., and Mesirov, J. P. (2005). Gene set enrichment analysis: a knowledge-based approach for interpreting genome-wide expression profiles. *Proc. Natl. Acad. Sci. U.S.A.*, 102(43):15545–15550.
- Xu, L., Naylor, D., Dong, Z., Simmons, T., Pierroz, G., Hixson, K. K., Kim, Y. M., Zink, E. M., Engbrecht, K. M., Wang, Y., Gao, C., DeGraaf, S., Madera, M. A., Sievert, J. A., Hollingsworth, J., Birdseye, D., Scheller, H. V., Hutmacher, R., Dahlberg, J., Jansson, C., Taylor, J. W., Lemaux, P. G., and Coleman-Derr, D. (2018). Drought delays development of the sorghum root microbiome and enriches for monoderm bacteria. *Proc. Natl. Acad. Sci. U.S.A.*, 115(18):E4284–E4293.
- Yoshida, K., Terashima, I., and Noguchi, K. (2007). Up-regulation of mitochondrial alternative oxidase concomitant with chloroplast over-reduction by excess light. *Plant Cell Physiol.*, 48(4):606–614.
- Zhou, G., Whong, W.-Z., Ong, T., and Chen, B. (2000). Development of a fungus-specific pcr assay for detecting low-level fungi in an indoor environment. *Molecular and Cellular Probes*, 14(6):339 – 348.

## 2 Supplementary Figures and Tables

### Tables

|   |                                                                              |    |
|---|------------------------------------------------------------------------------|----|
| 1 | Differential expression analysis across all time points . . . . .            | 11 |
| 2 | Differential expression analysis of the first week of drought . . . . .      | 11 |
| 3 | Up and down regulation patterns in pre- and post-flowering drought . . . . . | 11 |
| 4 | Types of Genotype-specific reactions to drought . . . . .                    | 12 |
| 5 | Annotation of <i>S. bicolor</i> transcriptome . . . . .                      | 12 |
| 6 | Flowering day per plot . . . . .                                             | 12 |
| 7 | Leaf Sampling Effort Per Week . . . . .                                      | 13 |
| 8 | Root Sampling Effort Per Week . . . . .                                      | 13 |
| 9 | Gene sets with highly shared patterns . . . . .                              | 14 |

### Figures

|    |                                                                                 |    |
|----|---------------------------------------------------------------------------------|----|
| 1  | Weather during sampling . . . . .                                               | 15 |
| 2  | Crop stress index & Water depletion . . . . .                                   | 16 |
| 3  | Soil Water Potential . . . . .                                                  | 17 |
| 4  | Root versus leaf in post-flowering . . . . .                                    | 18 |
| 5  | WRKY Transcription factor family (leaf) . . . . .                               | 19 |
| 6  | WRKY Transcription factor family (root) . . . . .                               | 20 |
| 7  | Mini Chromosome Repair protein family (leaf) . . . . .                          | 20 |
| 8  | Mini Chromosome Repair protein family (root) . . . . .                          | 21 |
| 9  | GO term “Response to Salicylic Acid” (root) . . . . .                           | 21 |
| 10 | GO term “Response to Jasmonic Acid” (root) . . . . .                            | 22 |
| 11 | GO term “Defense Response” (root) . . . . .                                     | 22 |
| 12 | GO term “Response to fungus” (root) . . . . .                                   | 23 |
| 13 | GO term “Regulation of defense response” (root) . . . . .                       | 23 |
| 14 | Photosynthesis antenna protein pathways shares common log fold change . . . . . | 24 |
| 15 | Western blot of photosynthesis proteins . . . . .                               | 24 |

## 2.1 Supplementary tables

### 2.1.1 Differential expression analyses

|                           | Root          |                | Leaf          |                |
|---------------------------|---------------|----------------|---------------|----------------|
|                           | Pre-flowering | Post-flowering | Pre-flowering | Post-flowering |
| Control-Drought RTx430    | 5977          | 4913           | 1889          | 2682           |
| Control-Drought BTx642    | 5457          | 3247           | 3231          | 1393           |
| Genotype specific drought | 1180          | 466            | 340           | 713            |

**Supplementary Table 1: Time-course differential expression (DE) analysis.** The number of genes found significant for any difference in expression across the time points (based on hypothesis testing of contrasts in the spline estimate of expression, see Methods). Breakdowns in the number of DE genes are given for different conditions (leaf/root and drought regimes in the columns). The first two rows show the number of DE genes found when comparing between droughted and watered samples in each genotype, analyzed separately (“Drought versus Control” contrast), while the last row gives the number of DE genes found to have genotype-specific reactions to drought (“Genotype-specific drought responses” contrast). Genes are considered DE if their FDR-adjusted q-value is  $< 0.05$  and at least a log-fold change of  $> 2$ .

|                           | Root          |                | Leaf          |                |
|---------------------------|---------------|----------------|---------------|----------------|
|                           | Pre-flowering | Post-flowering | Pre-flowering | Post-flowering |
| Control-Drought RTx430    | 939           | 1110           | 187           | 575            |
| Control-Drought BTx642    | 1129          | 1112           | 766           | 106            |
| Genotype specific drought | 452           | 72             | 125           | 33             |

**Supplementary Table 2: Differential expression analysis of the first week of drought** The number of genes found significant during the first week of drought (defined as Week 3 for pre-flowering drought and Week 10 for post-flowering drought, see Methods for description of per-week analysis), with a FDR-corrected q-value  $< 0.05$  and log fold change  $> 2$ .

|                                                               | Leaf | Root |
|---------------------------------------------------------------|------|------|
| Upregulated in pre- and post-flowering drought                | 1086 | 1584 |
| Downregulated in pre- and post-flowering drought              | 1038 | 1292 |
| Upregulated in pre-flowering, downregulated in post-flowering | 58   | 78   |
| Downregulated in pre-flowering, upregulated in post-flowering | 38   | 195  |

**Supplementary Table 3: Up and down regulation patterns in pre- and post-flowering drought.** The DE genes from Supplementary Table 1 are divided into different patterns of up and down regulation in pre and post-flowering drought. Genes found significant using the Fisher-combined q-value and which log-fold change is in the top or bottom 20% of significant genes are considered for this table.

|                                                                   | Root          |                | Leaf          |                |
|-------------------------------------------------------------------|---------------|----------------|---------------|----------------|
|                                                                   | Pre-flowering | Post-flowering | Pre-flowering | Post-flowering |
| Total number of genotype different genes                          | 480           | 799            | 2851          | 487            |
| Genes expressed in only one of the genotypes                      | 148 (30.83%)  | 105 (13.14%)   | 281 (9.86%)   | 97 (19.92%)    |
| Genes DE in only one of the genotypes                             | 147 (30.63%)  | 528 (66.08%)   | 547 (19.19%)  | 210 (43.12%)   |
| Genes with much stronger reaction in one of the genotypes         | 199 (41.46%)  | 282 (35.29%)   | 795 (27.88%)  | 246 (50.51%)   |
| Genes upregulated in one genotype and down-regulated in the other | 43 (8.96%)    | 37 (4.63%)     | 316 (11.08%)  | 27 (5.54%)     |
| Genes responding differently in recovery                          | 174 (36.25%)  | NA             | 1521 (53.35%) | NA             |

**Supplementary Table 4: Types of Genotype-specific reactions to drought.** The genes found to have genotype specific reactions to drought (Supplementary Table 1) are further broken down here by their comparative behavior in each genotype (rows). Note that the total of each row does not add to the total because not all of these categories are mutually exclusive.

|                           | Number of genes | Unannotated    | No homologs   | No homologs in Ara | No name in Ara. |
|---------------------------|-----------------|----------------|---------------|--------------------|-----------------|
| All genes                 | 34211           | 14664 (42.86%) | 5566 (16.27%) | 8349 (24.40%)      | 22931 (67.03%)  |
| Genes expressed in leaves | 21668           | 7378 (34.05%)  | 1538 (7.10%)  | 2622 (12.10%)      | 13283 (61.30%)  |
| Genes expressed in roots  | 23678           | 8174 (34.52%)  | 1684 (7.11%)  | 2924 (12.35%)      | 14602 (61.67%)  |
| DE genes                  | 10727           | 3923 (36.57%)  | 1059 (9.87%)  | 1870 (17.43%)      | 6537 (60.94%)   |
| DE genes in leaves        | 5135            | 1787 (34.80%)  | 467 (9.09%)   | 861 (16.77%)       | 3040 (59.20%)   |
| DE genes in roots         | 8899            | 3211 (36.08%)  | 807 (9.07%)   | 1490 (16.74%)      | 5414 (60.84%)   |

**Supplementary Table 5: Annotation of *S. bicolor* transcriptome** Number and proportion of *S. bicolor* genes that are, in the Phytozome v3.1 annotation, (1) unannotated (without GO annotation, KEGG information, nor a known homologue in Arabidopsis with a name); (2) with no homologs to Rice or arabidopsis; (3) with no homolog in Arabidopsis; (4) with no homolog to a named Arabidopsis gene.

| Genotype | Treatment | Plot | Flowering day |
|----------|-----------|------|---------------|
| BTx642   | Control   | 2    | 62            |
| BTx642   | Control   | 11   | 62            |
| BTx642   | Control   | 19   | 62            |
| BTx642   | Post      | 4    | 62            |
| BTx642   | Post      | 15   | 62            |
| BTx642   | Post      | 21   | 62            |
| BTx642   | Pre       | 6    | 68            |
| BTx642   | Pre       | 9    | 68            |
| BTx642   | Pre       | 14   | 82            |
| RTx430   | Control   | 1    | 68            |
| RTx430   | Control   | 12   | 68            |
| RTx430   | Control   | 20   | 68            |
| RTx430   | Post      | 3    | 68            |
| RTx430   | Post      | 16   | 68            |
| RTx430   | Post      | 22   | 68            |
| RTx430   | Pre       | 5    | 82            |
| RTx430   | Pre       | 13   | 80            |
| RTx430   | Pre       | 18   | 80            |

**Supplementary Table 6: Flowering day per plot.** The day of flowering per plot. Day 0 corresponds to the day the seeds were planted (5/27/2016)

| Week | Control |        | Post-flowering |        | Pre-flowering |        |
|------|---------|--------|----------------|--------|---------------|--------|
|      | BTx642  | RTx430 | BTx642         | RTx430 | BTx642        | RTx430 |
| 2    | 3       | 3      |                |        |               |        |
| 3    | 3       | 3      |                |        | 3             | 3      |
| 4    | 2       | 3      |                |        | 3             | 3      |
| 5    | 3       | 3      |                |        | 3             | 2      |
| 6    | 3       | 3      |                |        | 3             | 3      |
| 7    | 1       | 1      |                |        | 1             | 1      |
| 8    | 3       | 3      |                |        | 3             | 3      |
| 9    | 3       | 3      | 3              | 3      | 3             | 3      |
| 10   | 3       | 3      | 3              | 3      | 3             | 3      |
| 11   | 3       | 3      | 3              | 3      | 3             | 3      |
| 12   | 3       | 3      | 1              | 1      | 3             | 3      |
| 13   | 3       | 3      | 3              | 3      | 3             | 3      |
| 14   | 1       | 1      | 1              | 1      | 1             | 1      |
| 15   | 3       | 2      | 3              | 3      | 3             | 1      |
| 16   |         | 1      | 1              |        | 1             | 1      |
| 17   | 3       | 3      | 3              | 3      | 3             | 3      |

**Supplementary Table 7: Leaf Sampling Effort Per Week.** The number of mRNA-Seq leaf samples per week used in the analysis. Each sample consisted of a pool of plants per sample given above (usually 10, but in early weeks more plants were needed for sufficient tissue, see Methods). These numbers do not include the sample that was removed due to quality control (0629164L11).

| Week | Control |        | Post-flowering |        | Pre-flowering |        |
|------|---------|--------|----------------|--------|---------------|--------|
|      | BTx642  | RTx430 | BTx642         | RTx430 | BTx642        | RTx430 |
| 2    | 3       | 3      |                |        |               |        |
| 3    | 3       | 3      |                |        | 3             | 3      |
| 4    | 3       | 3      |                |        | 3             | 3      |
| 5    | 3       | 3      |                |        | 3             | 3      |
| 6    | 3       | 3      |                |        | 3             | 3      |
| 7    | 1       | 1      |                |        | 1             | 1      |
| 8    | 3       | 3      |                |        | 2             | 3      |
| 9    | 3       | 3      | 3              | 3      | 3             | 3      |
| 10   | 3       | 3      | 3              | 3      | 3             | 3      |
| 11   | 3       | 3      | 3              | 3      | 3             | 3      |
| 12   | 3       | 2      | 1              | 1      | 3             | 3      |
| 13   | 3       | 3      | 3              | 3      | 3             | 3      |
| 14   | 1       | 1      | 1              | 1      | 1             | 1      |
| 15   | 2       | 3      | 3              | 3      | 2             | 2      |
| 16   |         | 1      | 1              | 1      | 1             | 1      |
| 17   | 3       | 3      | 3              | 3      | 3             | 3      |

**Supplementary Table 8: Root Sampling Effort Per Week.** The number of mRNA-Seq root samples per week used in the analysis. Each sample consisted of a pool of plants per sample given above (usually 10, but in early weeks more plants were needed for sufficient tissue, see Methods). All root samples passed our quality control threshold and were considered for our analysis.

|                                                    | Sample type | No. inliers | Perc. inliers | No. of genes |
|----------------------------------------------------|-------------|-------------|---------------|--------------|
| Genes annotated CAB in Rice                        | leaf        | 11          | 64.71%        | 17           |
| DREB1 genes                                        | root        | 5           | 62.50%        | 8            |
| Genes annotated LHCB in Arabidopsis                | leaf        | 6           | 60.00%        | 10           |
| AMF-induced genes                                  | root        | 171         | 70.95%        | 241          |
| Chalcone and Stilben synthase genes                | root        | 11          | 64.71%        | 17           |
| Genes annotated LEA in Arabidopsis                 | root        | 5           | 71.43%        | 7            |
| MCM genes                                          | leaf        | 5           | 55.56%        | 9            |
| MCM genes                                          | root        | 8           | 72.73%        | 11           |
| Pathway 00196 - Photosynthesis - light antenna     | leaf        | 10          | 62.50%        | 16           |
| Pathway 00531 - Glycan biosynthesis and metabolism | root        | 8           | 53.33%        | 15           |
| Pathway 00603 - Glycosphingolipid biosynthesis ... | root        | 6           | 60.00%        | 10           |

**Supplementary Table 9: Gene sets with highly shared gene expression patterns** We detected 9 gene sets with greater than 50% of the genes in the gene sets sharing similar gene expression patterns (MCM genes sharing expression patterns both in leaf and root samples). See Methods for description of how gene sets with similar patterns across time were identified.

## 2.2 Supplementary Figures

### 2.2.1 Weather data & crop stress index

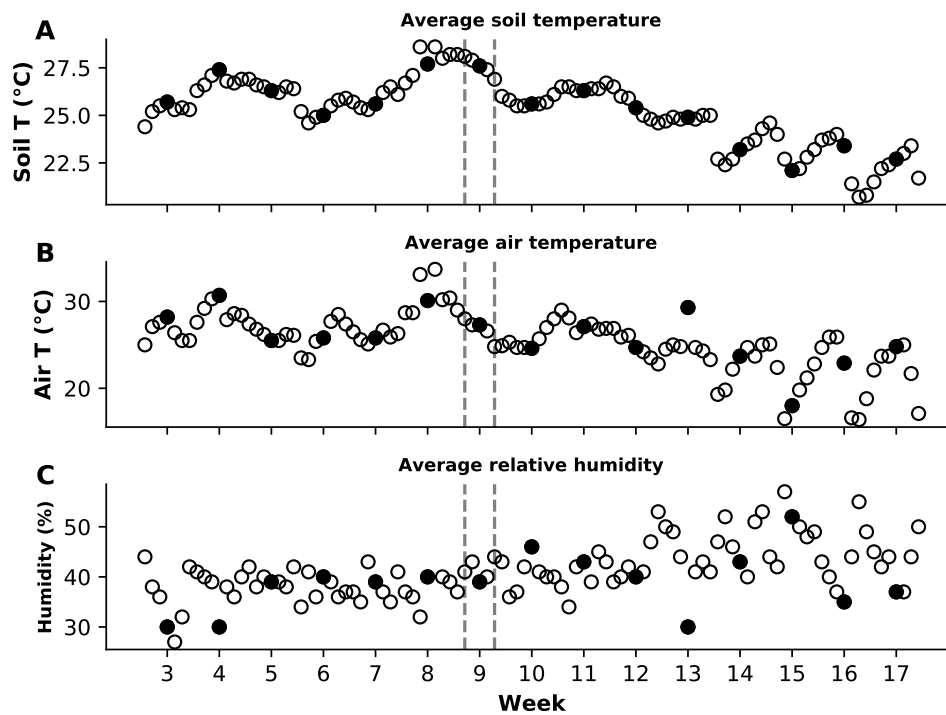

**Supplementary Figure 1: Weather during sampling** Y-axis shows the daily average soil temperature (A), air temperature (B), and relative humidity (C) plotted against the week of sampling (x-axis) as recorded by CIMIS (<https://cimis.water.ca.gov/>) at Station 39 (Parlier, CA) during the time of the field study. Black dots corresponds to sampling day. Dashed vertical lines correspond to watering changes for the two different drought regimes.

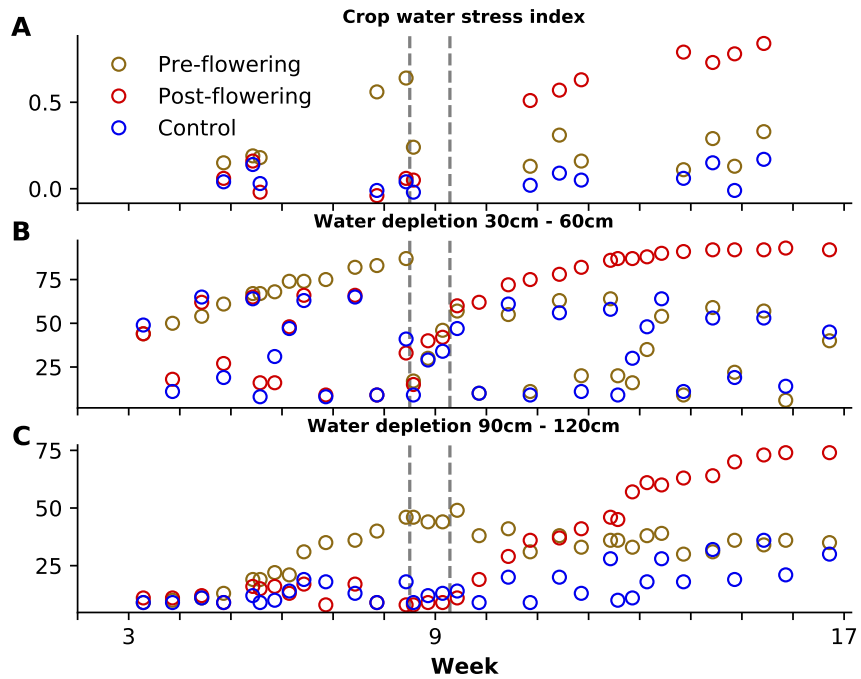

**Supplementary Figure 2: Crop stress index & Water depletion** Y-axis shows the crop water stress index (CWSI) (A), soil water depletion at 30-60 cm (B), and soil water depletion at 90-120cm (C) plotted against the week (x-axis). CWSI is a relative indicator of severity of plant water stress and indicates relative levels of plant water stress determined from the difference between air temperature and canopy/leaf temperatures, adjusted for vapor pressure deficit. Values of CWSI closer to 1.0 indicate a very severely water stressed plant, while values closer to 0.0 indicate non-water stressed condition. The measurements were not taken on the same days as the plant samples were collected; plant samples were collected at the points marked by ticks along the x-axis.



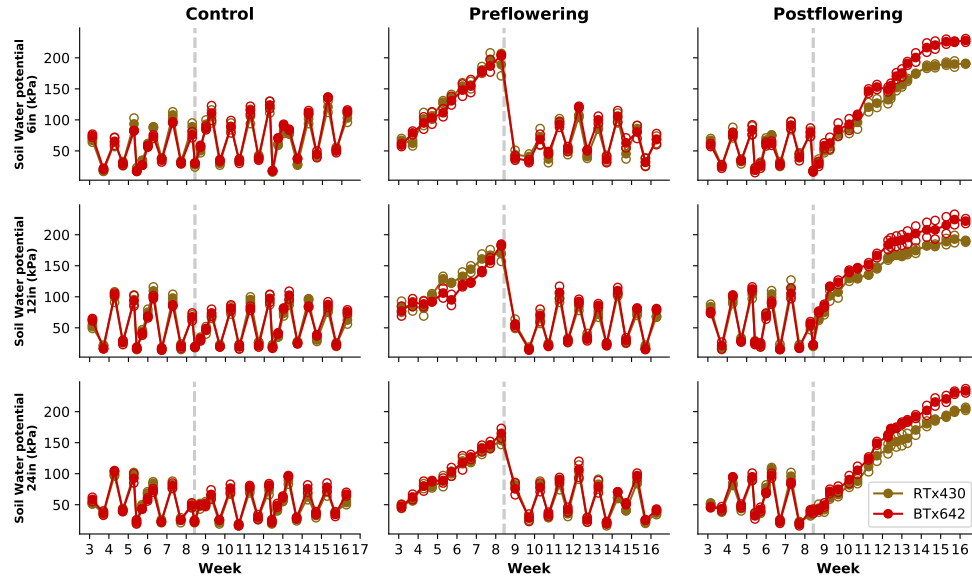

**Supplementary Figure 3: Soil Water Potential:** Soil water potential for two replicate plots for each condition and each genotype. Soil water potential for the two drought conditions show the decrease of water availability increasing during drought. A minor difference between the two genotypes can be observed at three different depths in post-flowering drought (p-values: 6in: 0.006, 12in: 0.044, 24in: 0.027), suggesting BTx642 is better able to extract water than RTx430. However, this difference is small (20kPa~25kPa), corresponding to only 1 or 2 days of ETc for a fully transpiring plant.

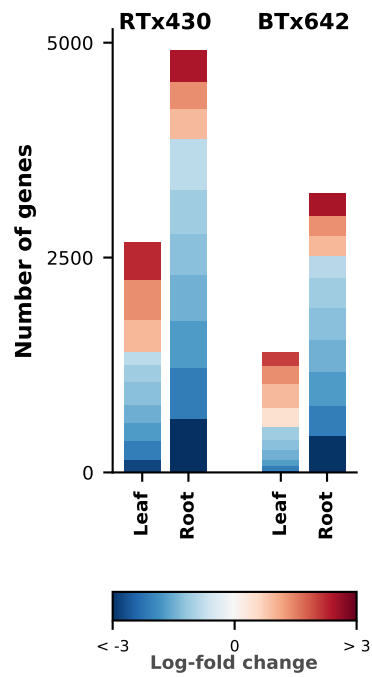

**Supplementary Figure 4: Root versus leaf in post-flowering** Barplot of significantly differentially expressed (DE) genes with at least a  $\log_2$ -fold difference in expression of 2 between drought and watered conditions in post-flowering drought.

### 2.2.2 Heatmaps of the log-fold change of relevant gene sets

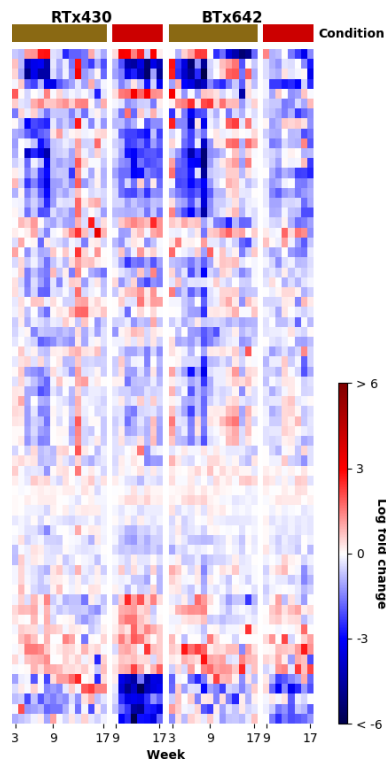

**Supplementary Figure 5: Log-fold change of WRKY Transcription factor family (leaf).** See methods for details on the annotation of putative transcription factors. The average difference in the log expression of drought and control is shown via a heatmap, where the color scale corresponds to log-fold change values indicated in the accompanying legend, with blue corresponding to lower expression under drought, and red higher expression under drought. The columns indicate the weeks of sampling, divided into groups based on the two genotypes and then further divided into pre-flowering (brown) and post-flowering drought (red).

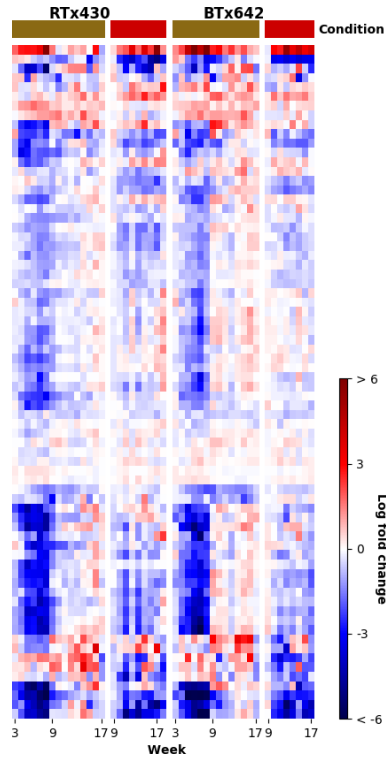

**Supplementary Figure 6: Log-fold change of WRKY Transcription factor family (root).** See methods for details on the annotation of putative transcription factors. See caption of Supplementary Figure 5 for details.

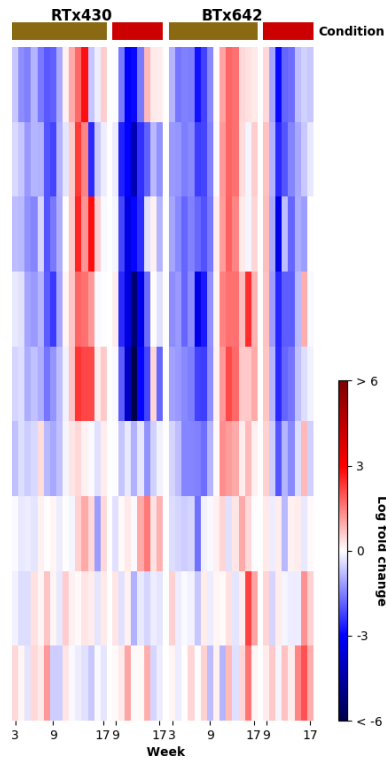

**Supplementary Figure 7: Log-fold change change of Mini Chromosome Repair protein family (leaf)** Known homologs to Arabidopsis MCM gene family. See caption of Supplementary Figure 5 for details.

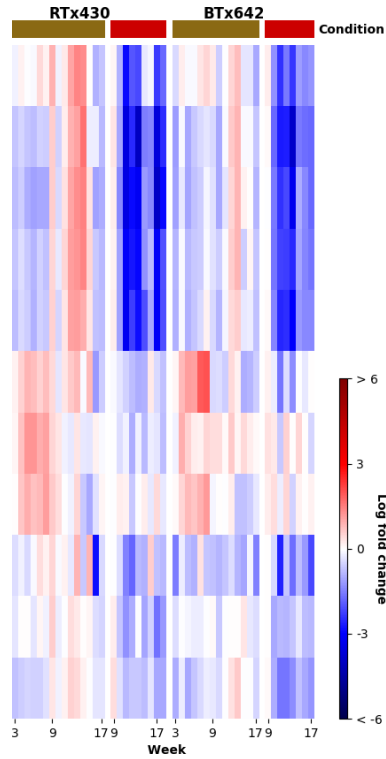

Supplementary Figure 8: Log-fold change - Mini Chromosome Repair protein family (root) Known homologs to Arabidopsis MCM gene family. See caption of Supplementary Figure 5 for details.

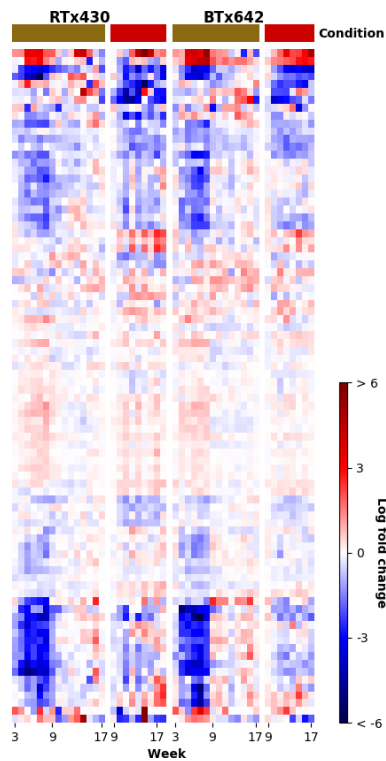

Supplementary Figure 9: Log-fold change change of GO term “Response to Salicylic Acid” (GO:009751) in root. See caption of Supplementary Figure 5 for details.

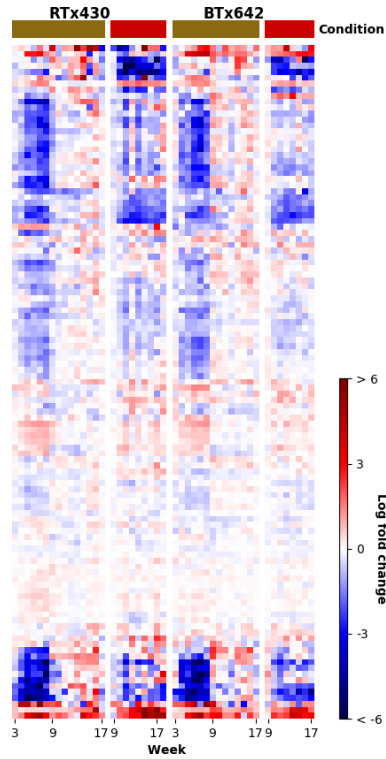

Supplementary Figure 10: Log-fold change change of GO term “Response to Jasmonic Acid” (GO:009753) in root. See caption of Supplementary Figure 5 for details.

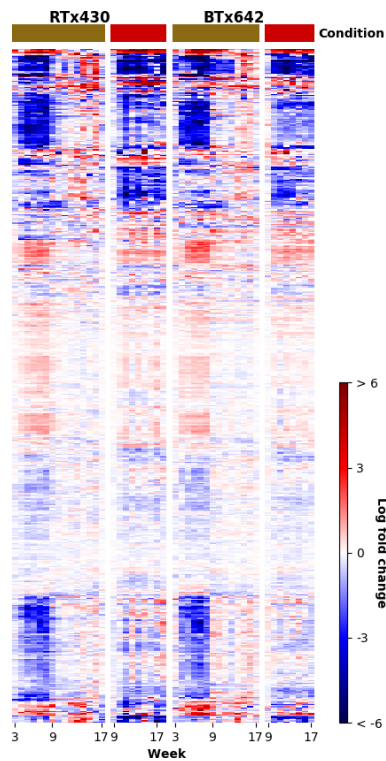

Supplementary Figure 11: Log-fold change change of GO term “Defense Response” (GO:006952) in root. See caption of Supplementary Figure 5 for details.

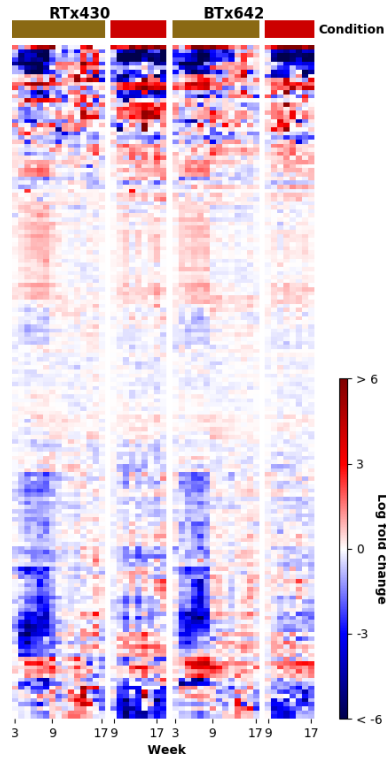

Supplementary Figure 12: Log-fold change change of GO term "Response to fungus" (GO:006952) in root. See caption of Supplementary Figure 5 for details.

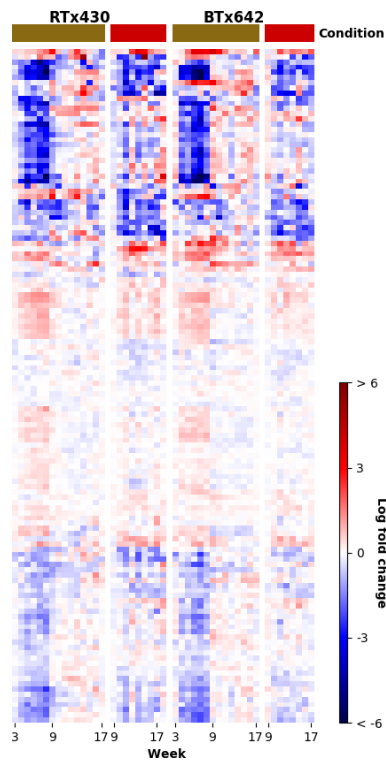

Supplementary Figure 13: Log-fold change change of GO term "Regulation of defense response" (GO:031347) in root. See caption of Supplementary Figure 5 for details.

### 2.2.3 Photosynthesis

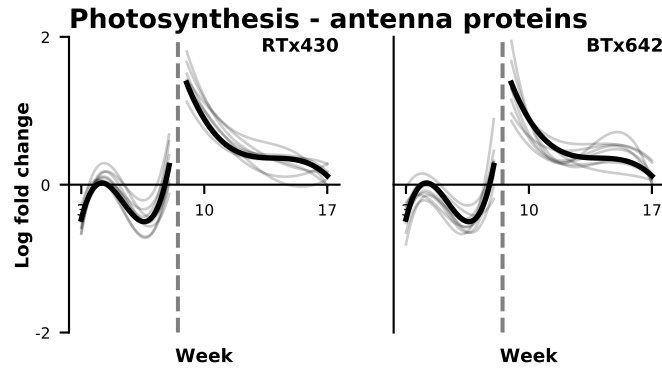

**Supplementary Figure 14: Photosynthesis antenna protein pathways shares common log fold change**  
 Log-fold change between droughted and watered plants (y-axis) shown as a smoothed function over time (x-axis) (see Figure 2 in main text) for genes from the photosynthesis-antenna protein pathway in pre-flowering drought stress showing shared up-regulation after water resumption. Shown are the genes chosen as the “inlier” set  $I_{\text{inlier}}$  of genes in the photosynthesis-antenna protein pathway (see Methods). The photosynthesis-antenna protein pathway was chosen as one of the top pathways showing shared gene expression across the time course (Supplemental Table 9). The dark line corresponds to the average fold-change, averaged across the genes.

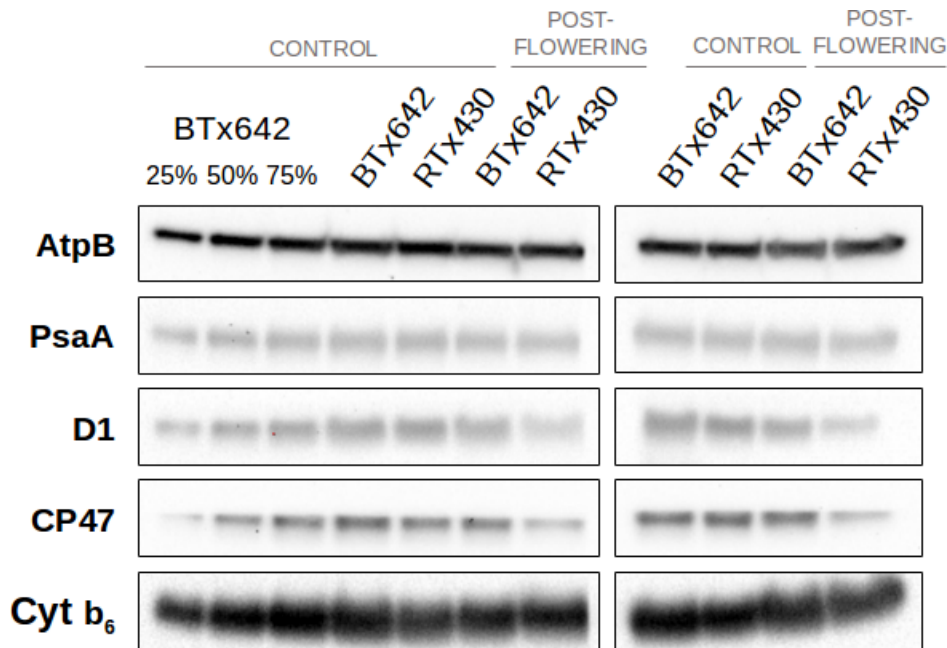

**Supplementary Figure 15: Western blot of photosynthesis proteins** Full results of the immunoblot analysis, including control, of representative subunits of photosynthetic complexes PSI (PsaA), PSII (D1, CP47), and cytochrome b6f complex (Cyt b6) under control and 3 weeks post-flowering drought (Week 11) with ATP synthase (AtpB) as a loading control.



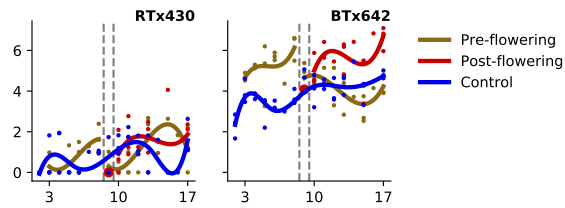

**Supplementary Figure 16: GST29 gene** Log-2 gene expression values (y-axis) against time (x-axis) of *Sobic.003G264400*, a homolog to GST29 with constitutive and drought differences between RTx430 (left) and BTx642 (right). Individual values are shown by dots, with a smooth split-splines showing the estimated functional forms.

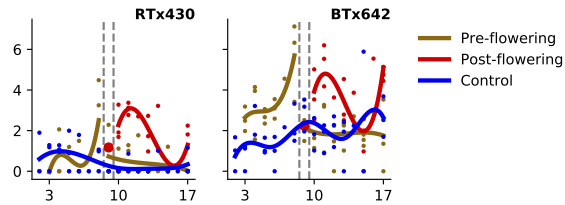

**Supplementary Figure 17: FD3 gene** Log-2 gene expression values (y-axis) against time (x-axis) of *Sobic.003G364400*, a homolog to FD3 with constitutive and drought differences between RTx430 (left) and BTx642 (right). See caption of Supplementary Figure 16 for details.

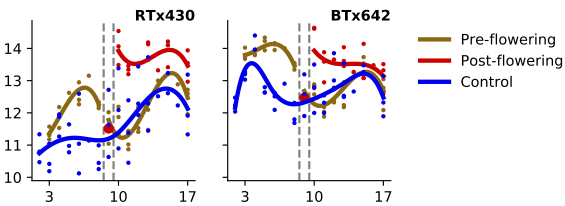

**Supplementary Figure 18: P5SC2 gene** Log-2 gene expression values (y-axis) against time (x-axis) of *Sobic.003G356000*, a homolog to P5SC2 with constitutive and drought differences between RTx430 (left) and BTx642 (right). See caption of Supplementary Figure 16 for details.

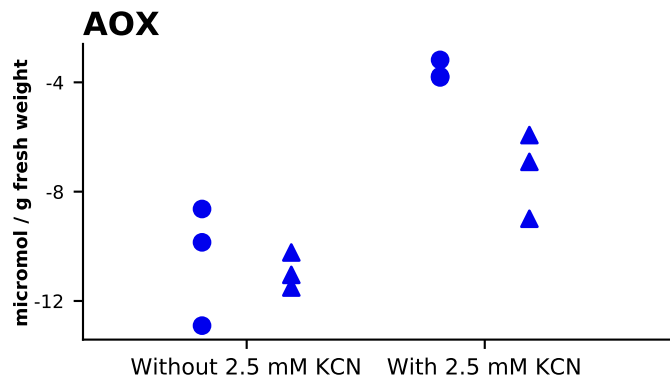

**Supplementary Figure 19: Alternative Oxidase Capacity** Oxygraph measurements of respiration in week 5 in normally watered plants with and without treatment of 2.5 mM KCN show BTx642 maintaining AOX capacity better than RTx430.

### 3 Cluster Summaries

|        |                                                                            |    |
|--------|----------------------------------------------------------------------------|----|
| 3.1    | Overview . . . . .                                                         | 27 |
| 3.2    | Leaf Preflowering clusters . . . . .                                       | 27 |
| 3.2.1  | Cluster 5 - Defense . . . . .                                              | 27 |
| 3.2.2  | Cluster 6 - Photosynthesis . . . . .                                       | 29 |
| 3.2.3  | Cluster 7 - Glutathione . . . . .                                          | 30 |
| 3.2.4  | Cluster 8 - Photosynthesis - light reaction . . . . .                      | 31 |
| 3.2.5  | Cluster 9 - Response to hydrogen peroxide . . . . .                        | 33 |
| 3.2.6  | Cluster 10 - DNA replication . . . . .                                     | 35 |
| 3.2.7  | Cluster 11 - Defense . . . . .                                             | 36 |
| 3.2.8  | Cluster 12 - Photosynthesis - light antenna . . . . .                      | 37 |
| 3.2.9  | Cluster 13 - stress . . . . .                                              | 39 |
| 3.2.10 | Cluster 15 - Cell wall organization, aromatic acids . . . . .              | 41 |
| 3.2.11 | Cluster 16 - Defense . . . . .                                             | 43 |
| 3.2.12 | Cluster 19 - secondary metabolites . . . . .                               | 44 |
| 3.3    | Leaf Postflowering clusters . . . . .                                      | 45 |
| 3.3.1  | Cluster 1 - Photosynthesis light reaction . . . . .                        | 45 |
| 3.3.2  | Cluster 2 - Response to ROS . . . . .                                      | 47 |
| 3.3.3  | Cluster 3 - Defense-post . . . . .                                         | 49 |
| 3.3.4  | Cluster 4 - Oxidative phosphorylation . . . . .                            | 50 |
| 3.3.5  | Cluster 6 - Defense-post-2 . . . . .                                       | 52 |
| 3.3.6  | Cluster 8 - Glutathione . . . . .                                          | 53 |
| 3.3.7  | Cluster 10 - Biosynthesis of secondary metabolites . . . . .               | 54 |
| 3.4    | Root Preflowering clusters . . . . .                                       | 55 |
| 3.4.1  | Cluster 1 - Development . . . . .                                          | 55 |
| 3.4.2  | Cluster 2 - Defense, amino acid . . . . .                                  | 57 |
| 3.4.3  | Cluster 3 - Cell wall . . . . .                                            | 58 |
| 3.4.4  | Cluster 4 - Defense . . . . .                                              | 60 |
| 3.4.5  | Cluster 6 - Lipid and cell wall biogenesis . . . . .                       | 62 |
| 3.4.6  | Cluster 8 - Lipid, suberin and secondary metabolite biosynthesis . . . . . | 63 |
| 3.4.7  | Cluster 9 - BTx642 . . . . .                                               | 65 |
| 3.4.8  | Cluster 10 - RTx430 . . . . .                                              | 67 |
| 3.4.9  | Cluster 11 - Stress . . . . .                                              | 68 |
| 3.4.10 | Cluster 12 - Defense response . . . . .                                    | 70 |
| 3.4.11 | Cluster 13 - Defense response . . . . .                                    | 72 |
| 3.4.12 | Cluster 14 - C2C2dof . . . . .                                             | 74 |
| 3.4.13 | Cluster 15 - Stress . . . . .                                              | 75 |
| 3.4.14 | Cluster 16 - Stress and gene regulation . . . . .                          | 77 |
| 3.4.15 | Cluster 17 - Gene regulation . . . . .                                     | 79 |
| 3.4.16 | Cluster 19 - AMF-pre . . . . .                                             | 81 |
| 3.4.17 | Cluster 20 - Development . . . . .                                         | 82 |
| 3.5    | Root Postflowering clusters . . . . .                                      | 84 |
| 3.5.1  | Cluster 1 - Stress . . . . .                                               | 84 |
| 3.5.2  | Cluster 2 - AMF-post . . . . .                                             | 86 |
| 3.5.3  | Cluster 3 - Cell wall biogenesis . . . . .                                 | 87 |
| 3.5.4  | Cluster 4 - Secondary metabolites . . . . .                                | 89 |
| 3.5.5  | Cluster 6 - Response to ethylene . . . . .                                 | 91 |
| 3.5.6  | Cluster 7 - Defense . . . . .                                              | 93 |
| 3.5.7  | Cluster 8 - Cell wall, and DNA replication . . . . .                       | 94 |
| 3.5.8  | Cluster 9 - Gene regulation . . . . .                                      | 96 |
| 3.5.9  | Cluster 10 - Gene regulation, and DNA replication . . . . .                | 97 |

### 3.1 Overview

In what follows, we provide figures and summary information about the clusters found in our clustering analysis. We only provide information on the clusters that show clear differences in gene expression between drought and control watering regimes. See Methods for details of how the clusters were created.

For each cluster we provide

1. A visualization of the average gene expression of the cluster, plotted separately for drought (red/brown) versus control (blue), and separate plots for the two genotypes. See Methods in the main manuscript for how these visualizations were created.
2. An overview of the cluster, giving a our title of the cluster, the number of total genes assigned to the cluster, the number of “good” genes (i.e. with good fit to the cluster centroid), and a brief description of interesting features of the cluster.
3. GO terms that are significantly enriched in the cluster, along with their adjusted p-value. Because of the large number of GO terms, we have for this summary filtered them to only show specific GO categories pre-specified to be of interest to drought. See Supplementary Note 2 “Full Cluster GO Annotation” for the complete GO annotation on all clusters.
4. All KEGG pathways that are enriched in the cluster, along with their adjusted p-value.
5. Transcription factors (TFs) whose motifs are found to be enriched in the promoter regions upstream of the genes in the cluster. Shown in the table are the number of motifs found enriched for the cluster, the total number of motifs association with that TF, and the percentage of the motifs found enriched.

### 3.2 Leaf Preflowering clusters

#### 3.2.1 Leaf - Preflowering - Cluster 5 - Defense

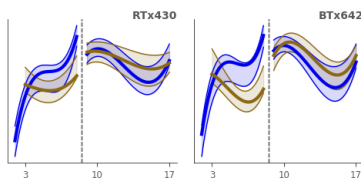

#### Overview

**Cluster 5:** Defense

**Number of genes:** 1289

**Number of “good” genes:** 424

**Description** Contains 3 DREB1 genes. Contains mainly WRKY and AP2-EREBP transcription factors.

| Pathway                                     | Adj. p-value |
|---------------------------------------------|--------------|
| Plant-pathogen interaction                  | 0.000        |
| MAPK signaling pathway - plant              | 0.008        |
| Protein processing in endoplasmic reticulum | 0.041        |

**Supplementary Table 10:** KEGG pathway enrichment - Leaf - Preflowering - Cluster 5 - Defense

| TF family | No. in cluster | Total number | Percentage |
|-----------|----------------|--------------|------------|
| CAMTA     | 2              | 2            | 100.00     |
| FAR1      | 2              | 2            | 100.00     |
| HMG       | 2              | 2            | 100.00     |
| mTERF     | 1              | 1            | 100.00     |
| AP2EREBP  | 85             | 130          | 65.38      |
| LOBAS2    | 6              | 13           | 46.15      |
| E2FDP     | 2              | 7            | 28.57      |
| TCP       | 6              | 23           | 26.09      |
| bHLH      | 3              | 25           | 12.00      |
| Trihelix  | 2              | 21           | 9.52       |
| C2H2      | 2              | 38           | 5.26       |
| NAC       | 3              | 86           | 3.49       |
| MYB       | 2              | 86           | 2.33       |

**Supplementary Table 11:** Motif enrichment Leaf - Preflowering - Cluster 5 - Defense

| GO type | GO ID      | Description                              | Adj. p-value |
|---------|------------|------------------------------------------|--------------|
| BP      | GO:0010468 | regulation of gene expression            | 0.000        |
|         | GO:0009607 | response to biotic stimulus              | 0.001        |
|         | GO:0009867 | jasmonic acid mediated signaling pathway | 0.002        |
|         | GO:0050832 | defense response to fungus               | 0.006        |
|         | GO:0009812 | flavonoid metabolic process              | 0.011        |
|         | GO:0031347 | regulation of defense response           | 0.015        |
|         | GO:0009813 | flavonoid biosynthetic process           | 0.018        |
|         | GO:0050793 | regulation of developmental process      | 0.064        |
|         | GO:0002376 | immune system process                    | 0.076        |
|         | GO:0042742 | defense response to bacterium            | 0.087        |
|         | GO:0009753 | response to jasmonic acid                | 0.098        |
|         | GO:0006950 | response to stress                       | 0.099        |

**Supplementary Table 13:** GO term enrichment (filtered results) Leaf - Preflowering - Cluster 5 - Defense

### 3.2.2 Leaf - Preflowering - Cluster 6 - Photosynthesis

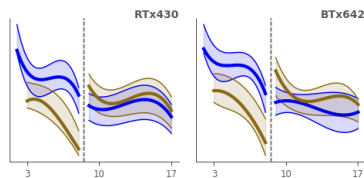

#### Overview

**Cluster 6:** Photosynthesis

**Number of genes:** 764

**Number of “good” genes:** 105

**Description** Many GO term related to photosynthesis enriched (light reaction, electron transport chain, regulation of photosynthesis, photosystem II repair)

| Pathway            | Adj. p-value |
|--------------------|--------------|
| Metabolic pathways | 0.021        |

**Supplementary Table 14:** KEGG pathway enrichment - Leaf - Preflowering - Cluster 6 - Photosynthesis

| TF family | No. in cluster | Total number | Percentage |
|-----------|----------------|--------------|------------|
| Trihelix  | 1              | 21           | 4.76       |

**Supplementary Table 15:** Motif enrichment Leaf - Preflowering - Cluster 6 - Photosynthesis

| GO type | GO ID      | Description                    | Adj. p-value |
|---------|------------|--------------------------------|--------------|
| BP      | GO:0019684 | photosynthesis, light reaction | 0.000        |
|         | GO:0022900 | electron transport chain       | 0.000        |
|         | GO:0042546 | cell wall biogenesis           | 0.000        |
|         | GO:0009628 | response to abiotic stimulus   | 0.002        |
|         | GO:0010109 | regulation of photosynthesis   | 0.003        |
| MF      | GO:0016787 | hydrolase activity             | 0.000        |
|         | GO:0031072 | heat shock protein binding     | 0.081        |

**Supplementary Table 17:** GO term enrichment (filtered results) Leaf - Preflowering - Cluster 6 - Photosynthesis

### 3.2.3 Leaf - Preflowering - Cluster 7 - Glutathione

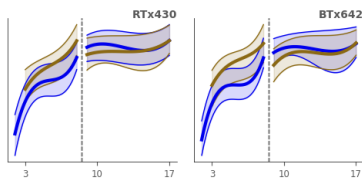

#### Overview

**Cluster 7:** Glutathione

**Number of genes:** 1690

**Number of “good” genes:** 747

**Description** Contains many GST

| Pathway                                     | Adj. p-value |
|---------------------------------------------|--------------|
| Protein processing in endoplasmic reticulum | 0.001        |
| Spliceosome                                 | 0.012        |
| Ubiquitin mediated proteolysis              | 0.013        |

**Supplementary Table 18:** KEGG pathway enrichment - Leaf - Preflowering - Cluster 7 - Glutathione

| TF family | No. in cluster | Total number | Percentage |
|-----------|----------------|--------------|------------|
| CPP       | 6              | 7            | 85.71      |
| Orphan    | 1              | 3            | 33.33      |
| ND        | 1              | 6            | 16.67      |
| HSF       | 2              | 16           | 12.50      |
| C2C2dof   | 3              | 39           | 7.69       |
| MYB       | 1              | 86           | 1.16       |
| NAC       | 1              | 86           | 1.16       |

**Supplementary Table 19:** Motif enrichment Leaf - Preflowering - Cluster 7 - Glutathione

| GO type | GO ID      | Description                      | Adj. p-value |
|---------|------------|----------------------------------|--------------|
| BP      | GO:0010468 | regulation of gene expression    | 0.000        |
|         | GO:0006749 | glutathione metabolic process    | 0.021        |
| MF      | GO:0004364 | glutathione transferase activity | 0.031        |
|         | GO:0015250 | water channel activity           | 0.056        |

**Supplementary Table 21:** GO term enrichment (filtered results) Leaf - Preflowering - Cluster 7 - Glutathione

### 3.2.4 Leaf - Preflowering - Cluster 8 - Photosynthesis - light reaction

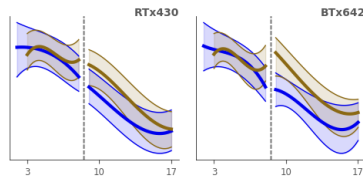

#### Overview

**Cluster 8:** Photosynthesis - light reaction

**Number of genes:** 1182

**Number of “good” genes:** 622

| Pathway                               | Adj. p-value |
|---------------------------------------|--------------|
| Metabolic pathways                    | 0.000        |
| Biosynthesis of secondary metabolites | 0.000        |
| Fructose and mannose metabolism       | 0.018        |
| Biosynthesis of amino acids           | 0.025        |
| Phagosome                             | 0.025        |
| Cyanoamino acid metabolism            | 0.044        |

**Supplementary Table 22:** KEGG pathway enrichment - Leaf - Preflowering - Cluster 8 - Photosynthesis - light reaction

| TF family | No. in cluster | Total number | Percentage |
|-----------|----------------|--------------|------------|
| TCP       | 3              | 23           | 13.04      |
| ABI3VP1   | 1              | 9            | 11.11      |
| ZFHD      | 1              | 11           | 9.09       |
| bZIP      | 3              | 51           | 5.88       |
| C2H2      | 1              | 38           | 2.63       |
| MYB       | 2              | 86           | 2.33       |
| AP2/EREBP | 2              | 130          | 1.54       |

**Supplementary Table 23:** Motif enrichment Leaf - Preflowering - Cluster 8 - Photosynthesis - light reaction

| GO type    | GO ID                                       | Description                                 | Adj. p-value |
|------------|---------------------------------------------|---------------------------------------------|--------------|
| BP         | GO:0019684                                  | photosynthesis, light reaction              | 0.000        |
|            | GO:0071554                                  | cell wall organization or biogenesis        | 0.000        |
|            | GO:0022900                                  | electron transport chain                    | 0.000        |
|            | GO:0006629                                  | lipid metabolic process                     | 0.000        |
|            | GO:0008610                                  | lipid biosynthetic process                  | 0.000        |
|            | GO:0071555                                  | cell wall organization                      | 0.000        |
|            | GO:0042546                                  | cell wall biogenesis                        | 0.000        |
|            | GO:0009073                                  | aromatic amino acid family biosynthetic ... | 0.000        |
|            | GO:0042214                                  | terpene metabolic process                   | 0.009        |
|            | GO:0008652                                  | cellular amino acid biosynthetic process    | 0.009        |
|            | GO:0010143                                  | cutin biosynthetic process                  | 0.017        |
|            | GO:0035336                                  | long-chain fatty-acyl-CoA metabolic proc... | 0.019        |
|            | GO:0104004                                  | cellular response to environmental stimu... | 0.021        |
|            | GO:0071214                                  | cellular response to abiotic stimulus       | 0.021        |
|            | GO:0009628                                  | response to abiotic stimulus                | 0.034        |
|            | GO:0010109                                  | regulation of photosynthesis                | 0.034        |
|            | GO:0044550                                  | secondary metabolite biosynthetic proces... | 0.036        |
|            | GO:0009741                                  | response to brassinosteroid                 | 0.050        |
|            | GO:0009642                                  | response to light intensity                 | 0.056        |
|            | GO:0010345                                  | suberin biosynthetic process                | 0.058        |
| GO:1901607 | alpha-amino acid biosynthetic process       | 0.068                                       |              |
| GO:0034614 | cellular response to reactive oxygen spe... | 0.071                                       |              |
| MF         | GO:0016787                                  | hydrolase activity                          | 0.000        |
|            | GO:0016491                                  | oxidoreductase activity                     | 0.000        |

**Supplementary Table 25:** GO term enrichment (filtered results) Leaf - Preflowering - Cluster 8 - Photosynthesis - light reaction



### 3.2.5 Leaf - Preflowering - Cluster 9 - Response to hydrogen peroxide

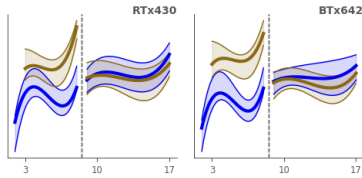

#### Overview

**Cluster 9:** Response to hydrogen peroxide

**Number of genes:** 1189

**Number of “good” genes:** 192

**Description** Many motifs from the HSF transcription factor family.

| Pathway                                     | Adj. p-value |
|---------------------------------------------|--------------|
| Protein processing in endoplasmic reticulum | 0.002        |
| Spliceosome                                 | 0.040        |

**Supplementary Table 26:** KEGG pathway enrichment - Leaf - Preflowering - Cluster 9 - Response to hydrogen peroxide

| TF family  | No. in cluster | Total number | Percentage |
|------------|----------------|--------------|------------|
| PLATZ      | 1              | 1            | 100.00     |
| S1F alike  | 1              | 1            | 100.00     |
| Orphan     | 2              | 3            | 66.67      |
| HSF        | 9              | 16           | 56.25      |
| ND         | 1              | 6            | 16.67      |
| bZIP       | 7              | 51           | 13.73      |
| C2C2dof    | 2              | 39           | 5.13       |
| bHLH       | 1              | 25           | 4.00       |
| C2H2       | 1              | 38           | 2.63       |
| MYBrelated | 1              | 47           | 2.13       |
| AP2/EREBP  | 1              | 130          | 0.77       |

**Supplementary Table 27:** Motif enrichment Leaf - Preflowering - Cluster 9 - Response to hydrogen peroxide

| GO type | GO ID      | Description                                 | Adj. p-value |
|---------|------------|---------------------------------------------|--------------|
|         | GO:0042542 | response to hydrogen peroxide               | 0.009        |
| BP      | GO:0010608 | posttranscriptional regulation of gene e... | 0.014        |
|         | GO:0009737 | response to abscisic acid                   | 0.078        |

**Supplementary Table 29:** GO term enrichment (filtered results) Leaf - Preflowering - Cluster 9 - Response to hydrogen peroxide

### 3.2.6 Leaf - Preflowering - Cluster 10 - DNA replication

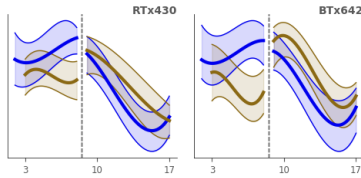

#### Overview

**Cluster 10:** DNA replication

**Number of genes:** 622

**Number of “good” genes:** 98

| Pathway         | Adj. p-value |
|-----------------|--------------|
| DNA replication | 0.000        |

**Supplementary Table 30:** KEGG pathway enrichment - Leaf - Preflowering - Cluster 10 - DNA replication

| TF family | No. in cluster | Total number | Percentage |
|-----------|----------------|--------------|------------|
| FAR1      | 2              | 2            | 100.00     |
| mTERF     | 1              | 1            | 100.00     |
| HMG       | 1              | 2            | 50.00      |
| AP2EREBP  | 50             | 130          | 38.46      |
| LOBAS2    | 3              | 13           | 23.08      |
| bHLH      | 2              | 25           | 8.00       |
| MYB       | 2              | 86           | 2.33       |

**Supplementary Table 31:** Motif enrichment Leaf - Preflowering - Cluster 10 - DNA replication

| GO type | GO ID      | Description                          | Adj. p-value |
|---------|------------|--------------------------------------|--------------|
| BP      | GO:0071554 | cell wall organization or biogenesis | 0.000        |
|         | GO:0006629 | lipid metabolic process              | 0.000        |
|         | GO:0006270 | DNA replication initiation           | 0.003        |
|         | GO:0006631 | fatty acid metabolic process         | 0.004        |
|         | GO:0006260 | DNA replication                      | 0.019        |
| MF      | GO:0016787 | hydrolase activity                   | 0.000        |

**Supplementary Table 33:** GO term enrichment (filtered results) Leaf - Preflowering - Cluster 10 - DNA replication

### 3.2.7 Leaf - Preflowering - Cluster 11 - Defense

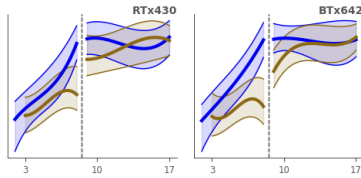

#### Overview

**Cluster 11:** Defense

**Number of genes:** 1259

**Number of “good” genes:** 857

| Pathway                                     | Adj. p-value |
|---------------------------------------------|--------------|
| Plant-pathogen interaction                  | 0.016        |
| Protein processing in endoplasmic reticulum | 0.045        |

**Supplementary Table 34:** KEGG pathway enrichment - Leaf - Preflowering - Cluster 11 - Defense

| TF family | No. in cluster | Total number | Percentage |
|-----------|----------------|--------------|------------|
| zfGRF     | 1              | 1            | 100.00     |
| WRKY      | 11             | 60           | 18.33      |
| E2FDP     | 1              | 7            | 14.29      |
| G2like    | 1              | 29           | 3.45       |
| bZIP      | 1              | 51           | 1.96       |

**Supplementary Table 35:** Motif enrichment Leaf - Preflowering - Cluster 11 - Defense

| GO type | GO ID      | Description                      | Adj. p-value |
|---------|------------|----------------------------------|--------------|
| BP      | GO:0009607 | response to biotic stimulus      | 0.015        |
|         | GO:0006749 | glutathione metabolic process    | 0.020        |
|         | GO:0006833 | water transport                  | 0.062        |
|         | GO:0050832 | defense response to fungus       | 0.076        |
| MF      | GO:0004364 | glutathione transferase activity | 0.011        |
|         | GO:0015250 | water channel activity           | 0.013        |

**Supplementary Table 37:** GO term enrichment (filtered results) Leaf - Preflowering - Cluster 11 - Defense

### 3.2.8 Leaf - Preflowering - Cluster 12 - Photosynthesis - light antenna

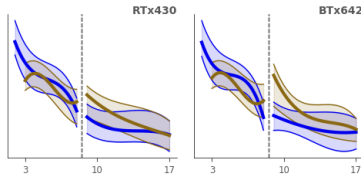

#### Overview

**Cluster 12:** Photosynthesis - light antenna

**Number of genes:** 1936

**Number of “good” genes:** 1295

| Pathway                                           | Adj. p-value |
|---------------------------------------------------|--------------|
| Metabolic pathways                                | 0.000        |
| Biosynthesis of secondary metabolites             | 0.000        |
| Porphyrin and chlorophyll metabolism              | 0.000        |
| Aminoacyl-tRNA biosynthesis                       | 0.001        |
| Carbon fixation in photosynthetic organisms       | 0.002        |
| Oxidative phosphorylation                         | 0.004        |
| Phenylalanine, tyrosine and tryptophan biosynt... | 0.005        |
| Biosynthesis of amino acids                       | 0.013        |
| Carbon metabolism                                 | 0.034        |
| Nitrogen metabolism                               | 0.043        |

**Supplementary Table 38:** KEGG pathway enrichment - Leaf - Preflowering - Cluster 12 - Photosynthesis - light antenna

| TF family | No. in cluster | Total number | Percentage |
|-----------|----------------|--------------|------------|
| BBRBPC    | 1              | 5            | 20.00      |
| ND        | 1              | 6            | 16.67      |
| MYB       | 10             | 86           | 11.63      |
| C2C2dof   | 2              | 39           | 5.13       |
| AP2EREBP  | 5              | 130          | 3.85       |
| C2H2      | 1              | 38           | 2.63       |

**Supplementary Table 39:** Motif enrichment Leaf - Preflowering - Cluster 12 - Photosynthesis - light antenna

| GO type | GO ID      | Description                                 | Adj. p-value |
|---------|------------|---------------------------------------------|--------------|
|         | GO:0019684 | photosynthesis, light reaction              | 0.000        |
|         | GO:0008610 | lipid biosynthetic process                  | 0.000        |
|         | GO:0022900 | electron transport chain                    | 0.000        |
|         | GO:0044255 | cellular lipid metabolic process            | 0.000        |
|         | GO:0006629 | lipid metabolic process                     | 0.000        |
|         | GO:0006631 | fatty acid metabolic process                | 0.000        |
|         | GO:0071555 | cell wall organization                      | 0.000        |
|         | GO:0015994 | chlorophyll metabolic process               | 0.000        |
|         | GO:0010109 | regulation of photosynthesis                | 0.002        |
|         | GO:0035336 | long-chain fatty-acyl-CoA metabolic proc... | 0.004        |
| BP      | GO:0042214 | terpene metabolic process                   | 0.004        |
|         | GO:0044550 | secondary metabolite biosynthetic proces... | 0.008        |
|         | GO:0010143 | cutin biosynthetic process                  | 0.009        |
|         | GO:0010345 | suberin biosynthetic process                | 0.027        |
|         | GO:0034599 | cellular response to oxidative stress       | 0.028        |
|         | GO:0009642 | response to light intensity                 | 0.028        |
|         | GO:1901607 | alpha-amino acid biosynthetic process       | 0.029        |
|         | GO:0009628 | response to abiotic stimulus                | 0.033        |
|         | GO:0104004 | cellular response to environmental stimu... | 0.049        |
|         | GO:0071214 | cellular response to abiotic stimulus       | 0.049        |
|         | GO:0072593 | reactive oxygen species metabolic proces... | 0.089        |
| MF      | GO:0016491 | oxidoreductase activity                     | 0.000        |
|         | GO:0031072 | heat shock protein binding                  | 0.009        |

**Supplementary Table 41:** GO term enrichment (filtered results) Leaf - Preflowering - Cluster 12 - Photosynthesis - light antenna

### 3.2.9 Leaf - Preflowering - Cluster 13 - stress

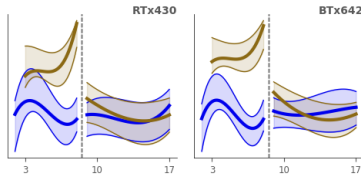

#### Overview

**Cluster 13:** stress

**Number of genes:** 777

**Number of “good” genes:** 163

**Description** Many GO terms related to stress (response to abiotic stimulus, cellular response to oxidative stress, response to temperature stimulus)

| Pathway            | Adj. p-value |
|--------------------|--------------|
| Metabolic pathways | 0.028        |
| Carbon metabolism  | 0.038        |

**Supplementary Table 42:** KEGG pathway enrichment - Leaf - Preflowering - Cluster 13 - stress

| TF family  | No. in cluster | Total number | Percentage |
|------------|----------------|--------------|------------|
| PLATZ      | 1              | 1            | 100.00     |
| bHLH       | 11             | 25           | 44.00      |
| C2C2COlike | 1              | 3            | 33.33      |
| C2C2gata   | 3              | 18           | 16.67      |
| ND         | 1              | 6            | 16.67      |
| bZIP       | 4              | 51           | 7.84       |
| Homeobox   | 1              | 22           | 4.55       |
| NAC        | 1              | 86           | 1.16       |
| AP2EREBP   | 1              | 130          | 0.77       |

**Supplementary Table 43:** Motif enrichment Leaf - Preflowering - Cluster 13 - stress

| GO type | GO ID      | Description                                 | Adj. p-value |
|---------|------------|---------------------------------------------|--------------|
|         | GO:0015979 | photosynthesis                              | 0.003        |
|         | GO:0003006 | developmental process involved in reprod... | 0.004        |
|         | GO:0009628 | response to abiotic stimulus                | 0.007        |
|         | GO:0040029 | regulation of gene expression, epigeneti... | 0.026        |
|         | GO:0104004 | cellular response to environmental stimu... | 0.026        |
|         | GO:0071214 | cellular response to abiotic stimulus       | 0.026        |
|         | GO:0009790 | embryo development                          | 0.029        |
| BP      | GO:0008652 | cellular amino acid biosynthetic process    | 0.029        |
|         | GO:0048608 | reproductive structure development          | 0.031        |
|         | GO:1901607 | alpha-amino acid biosynthetic process       | 0.034        |
|         | GO:0009791 | post-embryonic development                  | 0.037        |
|         | GO:0009735 | response to cytokinin                       | 0.040        |
|         | GO:0034599 | cellular response to oxidative stress       | 0.046        |
|         | GO:0016458 | gene silencing                              | 0.059        |
|         | GO:0048868 | pollen tube development                     | 0.090        |
|         | GO:0048316 | seed development                            | 0.094        |

**Supplementary Table 45:** GO term enrichment (filtered results) Leaf - Preflowering - Cluster 13 - stress



### 3.2.10 Leaf - Preflowering - Cluster 15 - Cell wall organization, aromatic acids

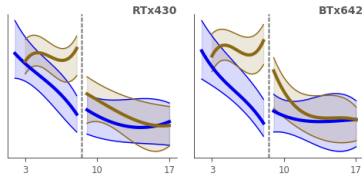

#### Overview

**Cluster 15:** Cell wall organization, aromatic acids

**Number of genes:** 1212

**Number of “good” genes:** 466

| Pathway                               | Adj. p-value |
|---------------------------------------|--------------|
| Metabolic pathways                    | 0.000        |
| Biosynthesis of secondary metabolites | 0.000        |
| Biosynthesis of amino acids           | 0.032        |

**Supplementary Table 46:** KEGG pathway enrichment - Leaf - Preflowering - Cluster 15 - Cell wall organization, aromatic acids

| TF family | No. in cluster | Total number | Percentage |
|-----------|----------------|--------------|------------|
| ZFHD      | 1              | 11           | 9.09       |

**Supplementary Table 47:** Motif enrichment Leaf - Preflowering - Cluster 15 - Cell wall organization, aromatic acids

| GO type | GO ID      | Description                                 | Adj. p-value |
|---------|------------|---------------------------------------------|--------------|
|         | GO:0008610 | lipid biosynthetic process                  | 0.000        |
|         | GO:0006629 | lipid metabolic process                     | 0.000        |
|         | GO:0006631 | fatty acid metabolic process                | 0.000        |
|         | GO:0009073 | aromatic amino acid family biosynthetic ... | 0.000        |
|         | GO:0071555 | cell wall organization                      | 0.000        |
|         | GO:0008652 | cellular amino acid biosynthetic process    | 0.001        |
|         | GO:0042546 | cell wall biogenesis                        | 0.002        |
|         | GO:0009642 | response to light intensity                 | 0.002        |
|         | GO:0009832 | plant-type cell wall biogenesis             | 0.003        |
| BP      | GO:0044550 | secondary metabolite biosynthetic proces... | 0.004        |
|         | GO:0009628 | response to abiotic stimulus                | 0.005        |
|         | GO:0035336 | long-chain fatty-acyl-CoA metabolic proc... | 0.006        |
|         | GO:0010345 | suberin biosynthetic process                | 0.010        |
|         | GO:0034599 | cellular response to oxidative stress       | 0.011        |
|         | GO:1901607 | alpha-amino acid biosynthetic process       | 0.032        |
|         | GO:0034614 | cellular response to reactive oxygen spe... | 0.046        |
|         | GO:0010143 | cutin biosynthetic process                  | 0.061        |
|         | GO:0104004 | cellular response to environmental stimu... | 0.066        |
|         | GO:0071214 | cellular response to abiotic stimulus       | 0.066        |
|         | GO:0003006 | developmental process involved in reprod... | 0.098        |
| CC      | GO:0009523 | photosystem II                              | 0.000        |
| MF      | GO:0016787 | hydrolase activity                          | 0.000        |
|         | GO:0016491 | oxidoreductase activity                     | 0.000        |

**Supplementary Table 49:** GO term enrichment (filtered results) Leaf - Preflowering - Cluster 15 - Cell wall organization, aromatic acids

### 3.2.11 Leaf - Preflowering - Cluster 16 - Defense

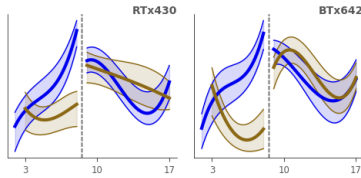

#### Overview

**Cluster 16:** Defense

**Number of genes:** 500

**Number of “good” genes:** 99

| Pathway                    | Adj. p-value |
|----------------------------|--------------|
| Plant-pathogen interaction | 0.000        |

**Supplementary Table 50:** KEGG pathway enrichment - Leaf - Preflowering - Cluster 16 - Defense

| TF family | No. in cluster | Total number | Percentage |
|-----------|----------------|--------------|------------|
| FAR1      | 1              | 2            | 50.00      |
| bHLH      | 1              | 25           | 4.00       |
| AP2/EREBP | 4              | 130          | 3.08       |
| MYB       | 1              | 86           | 1.16       |

**Supplementary Table 51:** Motif enrichment Leaf - Preflowering - Cluster 16 - Defense

| GO type | GO ID      | Description                    | Adj. p-value |
|---------|------------|--------------------------------|--------------|
| BP      | GO:0009607 | response to biotic stimulus    | 0.004        |
|         | GO:0050832 | defense response to fungus     | 0.008        |
|         | GO:0031347 | regulation of defense response | 0.026        |
|         | GO:0006950 | response to stress             | 0.052        |

**Supplementary Table 53:** GO term enrichment (filtered results) Leaf - Preflowering - Cluster 16 - Defense

### 3.2.12 Leaf - Preflowering - Cluster 19 - secondary metabolites

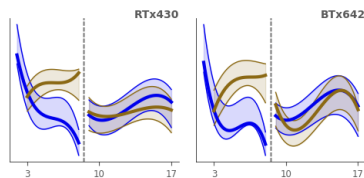

#### Overview

**Cluster 19:** secondary metabolites

**Number of genes:** 1020

**Number of “good” genes:** 63

| Pathway            | Adj. p-value |
|--------------------|--------------|
| Metabolic pathways | 0.015        |

**Supplementary Table 54:** KEGG pathway enrichment - Leaf - Preflowering - Cluster 19 - secondary metabolites

No motif found enriched

**Supplementary Table 55:** Motif enrichment Leaf - Preflowering - Cluster 19 - secondary metabolites

| GO type | GO ID      | Description        | Adj. p-value |
|---------|------------|--------------------|--------------|
| BP      | GO:0006396 | RNA processing     | 0.055        |
| MF      | GO:0016787 | hydrolase activity | 0.000        |

**Supplementary Table 57:** GO term enrichment (filtered results) Leaf - Preflowering - Cluster 19 - secondary metabolites

### 3.3 Leaf Postflowering clusters

#### 3.3.1 Leaf - Postflowering - Cluster 1 - Photosynthesis light reaction

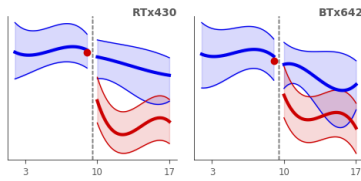

#### Overview

**Cluster 1:** Photosynthesis light reaction

**Number of genes:** 1856

**Number of “good” genes:** 756

| Pathway            | Adj. p-value |
|--------------------|--------------|
| DNA replication    | 0.000        |
| Metabolic pathways | 0.000        |

**Supplementary Table 58:** KEGG pathway enrichment - Leaf - Postflowering - Cluster 1 - Photosynthesis light reaction

| TF family | No. in cluster | Total number | Percentage |
|-----------|----------------|--------------|------------|
| Homeobox  | 4              | 22           | 18.18      |
| bHLH      | 3              | 25           | 12.00      |
| HB        | 1              | 16           | 6.25       |
| TCP       | 1              | 23           | 4.35       |

**Supplementary Table 59:** Motif enrichment Leaf - Postflowering - Cluster 1 - Photosynthesis light reaction

| GO type | GO ID      | Description                                 | Adj. p-value |
|---------|------------|---------------------------------------------|--------------|
|         | GO:0019684 | photosynthesis, light reaction              | 0.000        |
|         | GO:0006631 | fatty acid metabolic process                | 0.005        |
|         | GO:0042546 | cell wall biogenesis                        | 0.008        |
|         | GO:0022900 | electron transport chain                    | 0.011        |
|         | GO:0104004 | cellular response to environmental stimu... | 0.026        |
|         | GO:0071214 | cellular response to abiotic stimulus       | 0.026        |
| BP      | GO:0009888 | tissue development                          | 0.033        |
|         | GO:0009832 | plant-type cell wall biogenesis             | 0.034        |
|         | GO:0015995 | chlorophyll biosynthetic process            | 0.036        |
|         | GO:0006270 | DNA replication initiation                  | 0.049        |
|         | GO:0016116 | carotenoid metabolic process                | 0.066        |
|         | GO:0009607 | response to biotic stimulus                 | 0.066        |
|         | GO:0009733 | response to auxin                           | 0.072        |

**Supplementary Table 61:** GO term enrichment (filtered results) Leaf - Postflowering - Cluster 1 - Photosynthesis light reaction

### 3.3.2 Leaf - Postflowering - Cluster 2 - Response to ROS

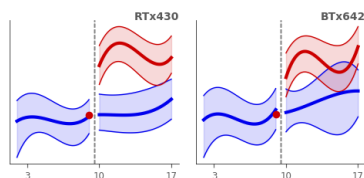

#### Overview

**Cluster 2:** Response to ROS

**Number of genes:** 1901

**Number of “good” genes:** 834

| Pathway                                           | Adj. p-value |
|---------------------------------------------------|--------------|
| Metabolic pathways                                | 0.000        |
| Carbon metabolism                                 | 0.000        |
| Glyoxylate and dicarboxylate metabolism           | 0.001        |
| Biosynthesis of secondary metabolites             | 0.004        |
| Valine, leucine and isoleucine degradation        | 0.011        |
| Ubiquinone and other terpenoid-quinone biosynt... | 0.012        |
| Biosynthesis of amino acids                       | 0.017        |
| Pyruvate metabolism                               | 0.034        |
| Galactose metabolism                              | 0.036        |

**Supplementary Table 62:** KEGG pathway enrichment - Leaf - Postflowering - Cluster 2 - Response to ROS

| TF family | No. in cluster | Total number | Percentage |
|-----------|----------------|--------------|------------|
| S1Falike  | 1              | 1            | 100.00     |
| AP2EREBP  | 69             | 130          | 53.08      |
| HMG       | 1              | 2            | 50.00      |
| Orphan    | 1              | 3            | 33.33      |
| LOBAS2    | 4              | 13           | 30.77      |
| HSF       | 4              | 16           | 25.00      |
| TCP       | 3              | 23           | 13.04      |
| bZIP      | 6              | 51           | 11.76      |
| C3H       | 1              | 10           | 10.00      |
| NAC       | 3              | 86           | 3.49       |
| MYB       | 2              | 86           | 2.33       |

**Supplementary Table 63:** Motif enrichment Leaf - Postflowering - Cluster 2 - Response to ROS

| GO type | GO ID      | Description                         | Adj. p-value |
|---------|------------|-------------------------------------|--------------|
| BP      | GO:0000302 | response to reactive oxygen species | 0.092        |

**Supplementary Table 65:** GO term enrichment (filtered results) Leaf - Postflowering - Cluster 2 - Response to ROS



### 3.3.3 Leaf - Postflowering - Cluster 3 - Defense-post

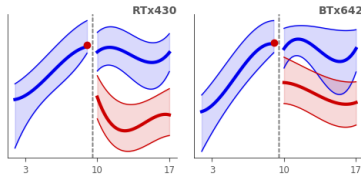

#### Overview

**Cluster 3:** Defense-post

**Number of genes:** 1591

**Number of “good” genes:** 550

**Description** Strong enrichment in many response to biotic stimulus and defense GO terms. Contains members of the WRKY and GRAS Transcription Factor family

No pathways found enriched

**Supplementary Table 66:** KEGG pathway enrichment - Leaf - Postflowering - Cluster 3 - Defense-post

No motif found enriched

**Supplementary Table 67:** Motif enrichment Leaf - Postflowering - Cluster 3 - Defense-post

| GO type | GO ID      | Description                              | Adj. p-value |
|---------|------------|------------------------------------------|--------------|
| BP      | GO:0009607 | response to biotic stimulus              | 0.000        |
|         | GO:0009867 | jasmonic acid mediated signaling pathway | 0.000        |
|         | GO:0031347 | regulation of defense response           | 0.002        |
|         | GO:0042742 | defense response to bacterium            | 0.003        |
|         | GO:0009620 | response to fungus                       | 0.004        |
|         | GO:0009751 | response to salicylic acid               | 0.010        |
|         | GO:0002376 | immune system process                    | 0.012        |
|         | GO:0006955 | immune response                          | 0.016        |
|         | GO:0050832 | defense response to fungus               | 0.018        |
|         | GO:0009812 | flavonoid metabolic process              | 0.030        |
|         | GO:0009813 | flavonoid biosynthetic process           | 0.039        |
|         | GO:0060548 | negative regulation of cell death        | 0.059        |

**Supplementary Table 69:** GO term enrichment (filtered results) Leaf - Postflowering - Cluster 3 - Defense-post

### 3.3.4 Leaf - Postflowering - Cluster 4 - Oxidative phosphorylation

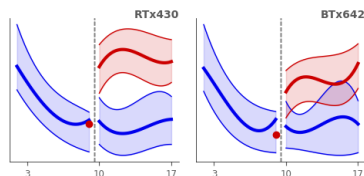

#### Overview

**Cluster 4:** Oxidative phosphorylation

**Number of genes:** 1478

**Number of “good” genes:** 408

**Description** Enrichment in oxidation-reduction process, oxidoreductase activity, electron transport chain.

| Pathway                     | Adj. p-value |
|-----------------------------|--------------|
| Metabolic pathways          | 0.000        |
| Oxidative phosphorylation   | 0.002        |
| Biosynthesis of amino acids | 0.039        |

**Supplementary Table 70:** KEGG pathway enrichment - Leaf - Postflowering - Cluster 4 - Oxidative phosphorylation

| TF family | No. in cluster | Total number | Percentage |
|-----------|----------------|--------------|------------|
| ARF       | 1              | 3            | 33.33      |
| ABI3VP1   | 1              | 9            | 11.11      |
| WRKY      | 6              | 60           | 10.00      |
| ZFHD      | 1              | 11           | 9.09       |
| Homeobox  | 1              | 22           | 4.55       |
| MYB       | 2              | 86           | 2.33       |

**Supplementary Table 71:** Motif enrichment Leaf - Postflowering - Cluster 4 - Oxidative phosphorylation

| GO type | GO ID      | Description                              | Adj. p-value |
|---------|------------|------------------------------------------|--------------|
|         | GO:0009628 | response to abiotic stimulus             | 0.005        |
| BP      | GO:0022900 | electron transport chain                 | 0.013        |
|         | GO:0008652 | cellular amino acid biosynthetic process | 0.024        |
|         | GO:1901607 | alpha-amino acid biosynthetic process    | 0.027        |
| MF      | GO:0016491 | oxidoreductase activity                  | 0.000        |

**Supplementary Table 73:** GO term enrichment (filtered results) Leaf - Postflowering - Cluster 4 - Oxidative phosphorylation

### 3.3.5 Leaf - Postflowering - Cluster 6 - Defense-post-2

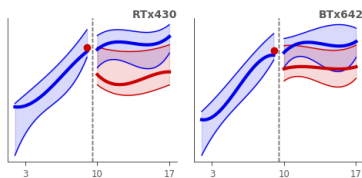

#### Overview

**Cluster 6:** Defense-post-2

**Number of genes:** 2415

**Number of “good” genes:** 1196

| Pathway                                     | Adj. p-value |
|---------------------------------------------|--------------|
| N-Glycan biosynthesis                       | 0.000        |
| Protein processing in endoplasmic reticulum | 0.001        |

**Supplementary Table 74:** KEGG pathway enrichment - Leaf - Postflowering - Cluster 6 - Defense-post-2

| TF family | No. in cluster | Total number | Percentage |
|-----------|----------------|--------------|------------|
| ZFHD      | 5              | 11           | 45.45      |
| E2FDP     | 1              | 7            | 14.29      |
| G2like    | 1              | 29           | 3.45       |
| C2H2      | 1              | 38           | 2.63       |
| bZIP      | 1              | 51           | 1.96       |

**Supplementary Table 75:** Motif enrichment Leaf - Postflowering - Cluster 6 - Defense-post-2

| GO type | GO ID      | Description                              | Adj. p-value |
|---------|------------|------------------------------------------|--------------|
| BP      | GO:0006749 | glutathione metabolic process            | 0.025        |
|         | GO:0009607 | response to biotic stimulus              | 0.026        |
|         | GO:0009867 | jasmonic acid mediated signaling pathway | 0.079        |
| MF      | GO:0004364 | glutathione transferase activity         | 0.014        |
|         | GO:0015250 | water channel activity                   | 0.045        |

**Supplementary Table 77:** GO term enrichment (filtered results) Leaf - Postflowering - Cluster 6 - Defense-post-2

### 3.3.6 Leaf - Postflowering - Cluster 8 - Glutathione

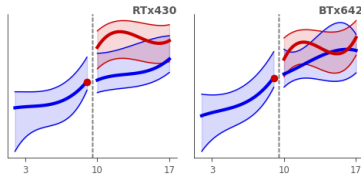

#### Overview

**Cluster 8:** Glutathione

**Number of genes:** 4197

**Number of “good” genes:** 2228

| Pathway                     | Adj. p-value |
|-----------------------------|--------------|
| Spliceosome                 | 0.000        |
| Ribosome                    | 0.000        |
| Basal transcription factors | 0.021        |

**Supplementary Table 78:** KEGG pathway enrichment - Leaf - Postflowering - Cluster 8 - Glutathione

| TF family  | No. in cluster | Total number | Percentage |
|------------|----------------|--------------|------------|
| CPP        | 7              | 7            | 100.00     |
| REM        | 2              | 2            | 100.00     |
| ABI3VP1    | 3              | 9            | 33.33      |
| Orphan     | 1              | 3            | 33.33      |
| MYBrelated | 15             | 47           | 31.91      |
| C2C2dof    | 12             | 39           | 30.77      |
| ND         | 1              | 6            | 16.67      |
| C2H2       | 3              | 38           | 7.89       |
| Trihelix   | 1              | 21           | 4.76       |

**Supplementary Table 79:** Motif enrichment Leaf - Postflowering - Cluster 8 - Glutathione

| GO type | GO ID      | Description                      | Adj. p-value |
|---------|------------|----------------------------------|--------------|
| BP      | GO:0006749 | glutathione metabolic process    | 0.009        |
| MF      | GO:0004364 | glutathione transferase activity | 0.085        |

**Supplementary Table 81:** GO term enrichment (filtered results) Leaf - Postflowering - Cluster 8 - Glutathione

### 3.3.7 Leaf - Postflowering - Cluster 10 - Biosynthesis of secondary metabolites

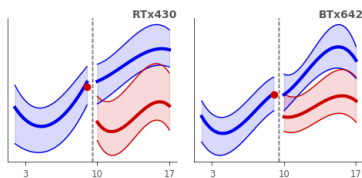

#### Overview

**Cluster 10:** Biosynthesis of secondary metabolites

**Number of genes:** 1069

**Number of “good” genes:** 296

| Pathway            | Adj. p-value |
|--------------------|--------------|
| Metabolic pathways | 0.002        |

**Supplementary Table 82:** KEGG pathway enrichment - Leaf - Postflowering - Cluster 10 - Biosynthesis of secondary metabolites

| TF family | No. in cluster | Total number | Percentage |
|-----------|----------------|--------------|------------|
| WRKY      | 1              | 60           | 1.67       |

**Supplementary Table 83:** Motif enrichment Leaf - Postflowering - Cluster 10 - Biosynthesis of secondary metabolites

| GO type | GO ID      | Description                                 | Adj. p-value |
|---------|------------|---------------------------------------------|--------------|
| BP      | GO:0044550 | secondary metabolite biosynthetic proces... | 0.014        |
|         | GO:0006820 | anion transport                             | 0.051        |
| MF      | GO:0016491 | oxidoreductase activity                     | 0.004        |
|         | GO:0010427 | abscisic acid binding                       | 0.035        |

**Supplementary Table 85:** GO term enrichment (filtered results) Leaf - Postflowering - Cluster 10 - Biosynthesis of secondary metabolites

### 3.4 Root Preflowering clusters

#### 3.4.1 Root - Preflowering - Cluster 1 - Development

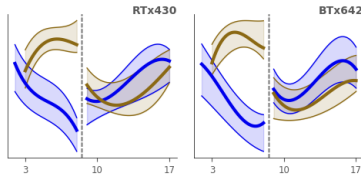

#### Overview

**Cluster 1:** Development

**Number of genes:** 1402

**Number of “good” genes:** 510

| Pathway                           | Adj. p-value |
|-----------------------------------|--------------|
| Ribosome biogenesis in eukaryotes | 0.006        |
| Nucleotide excision repair        | 0.031        |

**Supplementary Table 86:** KEGG pathway enrichment - Root - Preflowering - Cluster 1 - Development

| TF family | No. in cluster | Total number | Percentage |
|-----------|----------------|--------------|------------|
| HMG       | 1              | 2            | 50.00      |
| REM       | 1              | 2            | 50.00      |
| ABI3VP1   | 4              | 9            | 44.44      |
| CPP       | 3              | 7            | 42.86      |
| C2C2dof   | 8              | 39           | 20.51      |
| BBRBPC    | 1              | 5            | 20.00      |
| TCP       | 4              | 23           | 17.39      |
| LOBAS2    | 2              | 13           | 15.38      |
| E2FDP     | 1              | 7            | 14.29      |
| C2H2      | 3              | 38           | 7.89       |
| AP2EREBP  | 8              | 130          | 6.15       |
| Trihelix  | 1              | 21           | 4.76       |
| MYB       | 1              | 86           | 1.16       |

**Supplementary Table 87:** Motif enrichment Root - Preflowering - Cluster 1 - Development

| GO type | GO ID      | Description                                 | Adj. p-value |
|---------|------------|---------------------------------------------|--------------|
|         | GO:0003006 | developmental process involved in reprod... | 0.000        |
|         | GO:0009791 | post-embryonic development                  | 0.000        |
|         | GO:0048608 | reproductive structure development          | 0.000        |
|         | GO:0016458 | gene silencing                              | 0.000        |
|         | GO:0048731 | system development                          | 0.000        |
|         | GO:0009790 | embryo development                          | 0.000        |
|         | GO:0010608 | posttranscriptional regulation of gene e... | 0.000        |
|         | GO:0050793 | regulation of developmental process         | 0.000        |
|         | GO:0048869 | cellular developmental process              | 0.000        |
| BP      | GO:0009908 | flower development                          | 0.000        |
|         | GO:0006342 | chromatin silencing                         | 0.000        |
|         | GO:0048868 | pollen tube development                     | 0.010        |
|         | GO:0104004 | cellular response to environmental stimu... | 0.028        |
|         | GO:0071214 | cellular response to abiotic stimulus       | 0.028        |
|         | GO:0009642 | response to light intensity                 | 0.033        |
|         | GO:0042542 | response to hydrogen peroxide               | 0.034        |
|         | GO:0000302 | response to reactive oxygen species         | 0.041        |
|         | GO:0006950 | response to stress                          | 0.055        |
|         | GO:0034614 | cellular response to reactive oxygen spe... | 0.055        |

**Supplementary Table 89:** GO term enrichment (filtered results) Root - Preflowering - Cluster 1 - Development



### 3.4.2 Root - Preflowering - Cluster 2 - Defense, amino acid

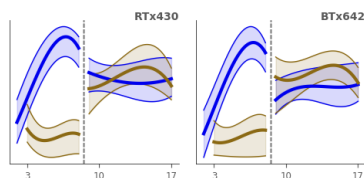

#### Overview

**Cluster 2:** Defense, amino acid

**Number of genes:** 526

**Number of “good” genes:** 350

| Pathway                               | Adj. p-value |
|---------------------------------------|--------------|
| Metabolic pathways                    | 0.000        |
| Biosynthesis of secondary metabolites | 0.000        |

**Supplementary Table 90:** KEGG pathway enrichment - Root - Preflowering - Cluster 2 - Defense, amino acid

| TF family | No. in cluster | Total number | Percentage |
|-----------|----------------|--------------|------------|
| SBP       | 2              | 13           | 15.38      |
| WRKY      | 7              | 60           | 11.67      |
| ABI3VP1   | 1              | 9            | 11.11      |
| MYB       | 3              | 86           | 3.49       |
| AP2EREBP  | 1              | 130          | 0.77       |

**Supplementary Table 91:** Motif enrichment Root - Preflowering - Cluster 2 - Defense, amino acid

| GO type | GO ID      | Description                                 | Adj. p-value |
|---------|------------|---------------------------------------------|--------------|
| BP      | GO:0009753 | response to jasmonic acid                   | 0.000        |
|         | GO:0006820 | anion transport                             | 0.007        |
|         | GO:0009607 | response to biotic stimulus                 | 0.007        |
|         | GO:0009073 | aromatic amino acid family biosynthetic ... | 0.009        |
|         | GO:0009751 | response to salicylic acid                  | 0.010        |

**Supplementary Table 93:** GO term enrichment (filtered results) Root - Preflowering - Cluster 2 - Defense, amino acid

### 3.4.3 Root - Preflowering - Cluster 3 - Cell wall

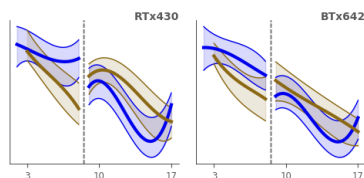

#### Overview

**Cluster 3:** Cell wall

**Number of genes:** 956

**Number of “good” genes:** 655

| Pathway                                     | Adj. p-value |
|---------------------------------------------|--------------|
| Metabolic pathways                          | 0.000        |
| Biosynthesis of secondary metabolites       | 0.005        |
| Amino sugar and nucleotide sugar metabolism | 0.007        |
| Flavonoid biosynthesis                      | 0.038        |

**Supplementary Table 94:** KEGG pathway enrichment - Root - Preflowering - Cluster 3 - Cell wall

| TF family | No. in cluster | Total number | Percentage |
|-----------|----------------|--------------|------------|
| HMG       | 2              | 2            | 100.00     |
| NLP       | 1              | 1            | 100.00     |
| mTERF     | 1              | 1            | 100.00     |
| AP2EREBP  | 61             | 130          | 46.92      |
| MYB       | 23             | 86           | 26.74      |
| LOBAS2    | 3              | 13           | 23.08      |
| C2C2gata  | 1              | 18           | 5.56       |
| bHLH      | 1              | 25           | 4.00       |
| C2H2      | 1              | 38           | 2.63       |
| NAC       | 2              | 86           | 2.33       |

**Supplementary Table 95:** Motif enrichment Root - Preflowering - Cluster 3 - Cell wall

| GO type | GO ID      | Description                                 | Adj. p-value |
|---------|------------|---------------------------------------------|--------------|
|         | GO:0009832 | plant-type cell wall biogenesis             | 0.000        |
|         | GO:0006631 | fatty acid metabolic process                | 0.000        |
|         | GO:0048868 | pollen tube development                     | 0.000        |
|         | GO:0006979 | response to oxidative stress                | 0.000        |
|         | GO:0006833 | water transport                             | 0.002        |
|         | GO:0044550 | secondary metabolite biosynthetic proces... | 0.003        |
| BP      | GO:0042545 | cell wall modification                      | 0.004        |
|         | GO:0044255 | cellular lipid metabolic process            | 0.005        |
|         | GO:0006270 | DNA replication initiation                  | 0.011        |
|         | GO:0008610 | lipid biosynthetic process                  | 0.022        |
|         | GO:0071470 | cellular response to osmotic stress         | 0.030        |
|         | GO:0010345 | suberin biosynthetic process                | 0.040        |
|         | GO:0009741 | response to brassinosteroid                 | 0.067        |
| MF      | GO:0015250 | water channel activity                      | 0.001        |

**Supplementary Table 97:** GO term enrichment (filtered results) Root - Preflowering - Cluster 3 - Cell wall

### 3.4.4 Root - Preflowering - Cluster 4 - Defense

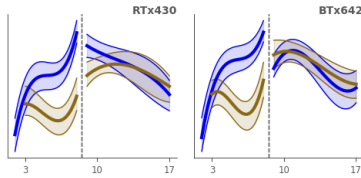

#### Overview

**Cluster 4:** Defense

**Number of genes:** 802

**Number of “good” genes:** 505

**Description** Enriched in many motifs from the AP2-EREBP TF family

| Pathway                           | Adj. p-value |
|-----------------------------------|--------------|
| Plant hormone signal transduction | 0.009        |
| Plant-pathogen interaction        | 0.017        |

**Supplementary Table 98:** KEGG pathway enrichment - Root - Preflowering - Cluster 4 - Defense

| TF family | No. in cluster | Total number | Percentage |
|-----------|----------------|--------------|------------|
| CAMTA     | 2              | 2            | 100.00     |
| FAR1      | 2              | 2            | 100.00     |
| HMG       | 2              | 2            | 100.00     |
| mTERF     | 1              | 1            | 100.00     |
| AP2EREBP  | 70             | 130          | 53.85      |
| LOBAS2    | 5              | 13           | 38.46      |
| Trihelix  | 3              | 21           | 14.29      |
| TCP       | 1              | 23           | 4.35       |
| bHLH      | 1              | 25           | 4.00       |
| MYB       | 3              | 86           | 3.49       |
| NAC       | 2              | 86           | 2.33       |

**Supplementary Table 99:** Motif enrichment Root - Preflowering - Cluster 4 - Defense

| GO type | GO ID      | Description                              | Adj. p-value |
|---------|------------|------------------------------------------|--------------|
|         | GO:0009753 | response to jasmonic acid                | 0.000        |
|         | GO:0009751 | response to salicylic acid               | 0.000        |
|         | GO:0009867 | jasmonic acid mediated signaling pathway | 0.000        |
| BP      | GO:0010468 | regulation of gene expression            | 0.004        |
|         | GO:0031347 | regulation of defense response           | 0.005        |
|         | GO:0009620 | response to fungus                       | 0.019        |
|         | GO:0050832 | defense response to fungus               | 0.030        |
| MF      | GO:0016491 | oxidoreductase activity                  | 0.007        |

**Supplementary Table 101:** GO term enrichment (filtered results) Root - Preflowering - Cluster 4 - Defense

### 3.4.5 Root - Preflowering - Cluster 6 - Lipid and cell wall biogenesis

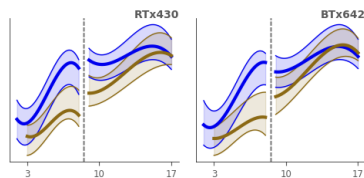

#### Overview

**Cluster 6:** Lipid and cell wall biogenesis

**Number of genes:** 1642

**Number of “good” genes:** 1384

| Pathway                                           | Adj. p-value |
|---------------------------------------------------|--------------|
| Metabolic pathways                                | 0.023        |
| Phenylalanine, tyrosine and tryptophan biosynt... | 0.048        |

**Supplementary Table 102:** KEGG pathway enrichment - Root - Preflowering - Cluster 6 - Lipid and cell wall biogenesis

| TF family | No. in cluster | Total number | Percentage |
|-----------|----------------|--------------|------------|
| ARID      | 1              | 6            | 16.67      |
| ND        | 1              | 6            | 16.67      |
| ABI3VP1   | 1              | 9            | 11.11      |
| ZFHD      | 1              | 11           | 9.09       |
| Homeobox  | 1              | 22           | 4.55       |
| C2H2      | 1              | 38           | 2.63       |
| C2C2dof   | 1              | 39           | 2.56       |

**Supplementary Table 103:** Motif enrichment Root - Preflowering - Cluster 6 - Lipid and cell wall biogenesis

| GO type | GO ID      | Description                      | Adj. p-value |
|---------|------------|----------------------------------|--------------|
| BP      | GO:0006749 | glutathione metabolic process    | 0.045        |
|         | GO:0006820 | anion transport                  | 0.049        |
| MF      | GO:0004364 | glutathione transferase activity | 0.022        |
|         | GO:0010427 | abscisic acid binding            | 0.071        |

**Supplementary Table 105:** GO term enrichment (filtered results) Root - Preflowering - Cluster 6 - Lipid and cell wall biogenesis

### 3.4.6 Root - Preflowering - Cluster 8 - Lipid, suberin and secondary metabolite biosynthesis

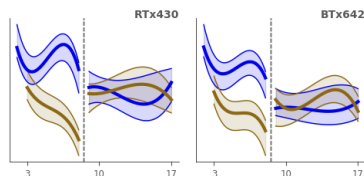

#### Overview

**Cluster 8:** Lipid, suberin and secondary metabolite biosynthesis

**Number of genes:** 1108

**Number of “good” genes:** 501

| Pathway                                           | Adj. p-value |
|---------------------------------------------------|--------------|
| Metabolic pathways                                | 0.000        |
| Proteasome                                        | 0.000        |
| Carbon metabolism                                 | 0.000        |
| Biosynthesis of amino acids                       | 0.000        |
| Citrate cycle (TCA cycle)                         | 0.003        |
| Oxidative phosphorylation                         | 0.006        |
| Biosynthesis of secondary metabolites             | 0.007        |
| Phenylalanine, tyrosine and tryptophan biosynt... | 0.009        |
| Cutin, suberine and wax biosynthesis              | 0.009        |

**Supplementary Table 106:** KEGG pathway enrichment - Root - Preflowering - Cluster 8 - Lipid, suberin and secondary metabolite biosynthesis

| TF family | No. in cluster | Total number | Percentage |
|-----------|----------------|--------------|------------|
| REM       | 2              | 2            | 100.00     |
| MYB       | 10             | 86           | 11.63      |
| ABI3VP1   | 1              | 9            | 11.11      |
| C2C2dof   | 1              | 39           | 2.56       |

**Supplementary Table 107:** Motif enrichment Root - Preflowering - Cluster 8 - Lipid, suberin and secondary metabolite biosynthesis

| GO type | GO ID      | Description                                 | Adj. p-value |
|---------|------------|---------------------------------------------|--------------|
|         | GO:0009832 | plant-type cell wall biogenesis             | 0.000        |
|         | GO:0044550 | secondary metabolite biosynthetic proces... | 0.000        |
|         | GO:0006270 | DNA replication initiation                  | 0.004        |
| BP      | GO:0006833 | water transport                             | 0.006        |
|         | GO:0008610 | lipid biosynthetic process                  | 0.016        |
|         | GO:0010345 | suberin biosynthetic process                | 0.016        |
|         | GO:0040007 | growth                                      | 0.094        |
| MF      | GO:0016491 | oxidoreductase activity                     | 0.000        |
|         | GO:0004364 | glutathione transferase activity            | 0.017        |

**Supplementary Table 109:** GO term enrichment (filtered results) Root - Preflowering - Cluster 8 - Lipid, suberin and secondary metabolite biosynthesis



### 3.4.7 Root - Preflowering - Cluster 9 - BTx642

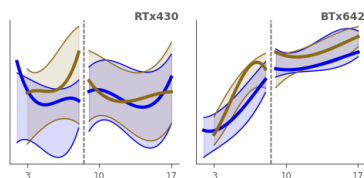

#### Overview

**Cluster 9:** BTx642

**Number of genes:** 294

**Number of “good” genes:** 37

**Description** Enriched in C2C2dof

No pathways found enriched

**Supplementary Table 110:** KEGG pathway enrichment - Root - Preflowering - Cluster 9 - BTx642

| TF family  | No. in cluster | Total number | Percentage |
|------------|----------------|--------------|------------|
| FAR1       | 2              | 2            | 100.00     |
| C2C2COlike | 2              | 3            | 66.67      |
| bZIP       | 23             | 51           | 45.10      |
| C2C2dof    | 16             | 39           | 41.03      |
| TCP        | 8              | 23           | 34.78      |
| Orphan     | 1              | 3            | 33.33      |
| LOBAS2     | 3              | 13           | 23.08      |
| C3H        | 2              | 10           | 20.00      |
| Trihelix   | 4              | 21           | 19.05      |
| BZR        | 1              | 7            | 14.29      |
| ABI3VP1    | 1              | 9            | 11.11      |
| bHLH       | 2              | 25           | 8.00       |
| C2H2       | 3              | 38           | 7.89       |
| NAC        | 3              | 86           | 3.49       |
| AP2EREBP   | 3              | 130          | 2.31       |
| MYB        | 1              | 86           | 1.16       |

**Supplementary Table 111:** Motif enrichment Root - Preflowering - Cluster 9 - BTx642

| GO type | GO ID      | Description                         | Adj. p-value |
|---------|------------|-------------------------------------|--------------|
|         | GO:0006396 | RNA processing                      | 0.000        |
| BP      | GO:0006351 | transcription, DNA-templated        | 0.000        |
|         | GO:0009812 | flavonoid metabolic process         | 0.006        |
|         | GO:0050793 | regulation of developmental process | 0.069        |

**Supplementary Table 113:** GO term enrichment (filtered results) Root - Preflowering - Cluster 9 - BTx642

### 3.4.8 Root - Preflowering - Cluster 10 - RTx430

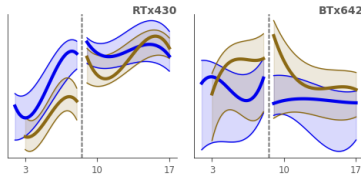

#### Overview

**Cluster 10:** RTx430

**Number of genes:** 220

**Number of “good” genes:** 21

No pathways found enriched

**Supplementary Table 114:** KEGG pathway enrichment - Root - Preflowering - Cluster 10 - RTx430

| TF family | No. in cluster | Total number | Percentage |
|-----------|----------------|--------------|------------|
| bZIP      | 1              | 51           | 1.96       |

**Supplementary Table 115:** Motif enrichment Root - Preflowering - Cluster 10 - RTx430

| GO type | GO ID      | Description                                 | Adj. p-value |
|---------|------------|---------------------------------------------|--------------|
| BP      | GO:0010468 | regulation of gene expression               | 0.007        |
|         | GO:0006351 | transcription, DNA-templated                | 0.018        |
|         | GO:0006749 | glutathione metabolic process               | 0.020        |
|         | GO:0044550 | secondary metabolite biosynthetic proces... | 0.023        |
|         | GO:0042742 | defense response to bacterium               | 0.088        |
|         | GO:0009607 | response to biotic stimulus                 | 0.090        |
| MF      | GO:0004364 | glutathione transferase activity            | 0.003        |

**Supplementary Table 117:** GO term enrichment (filtered results) Root - Preflowering - Cluster 10 - RTx430

### 3.4.9 Root - Preflowering - Cluster 11 - Stress

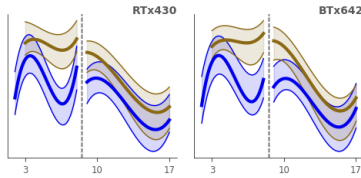

#### Overview

**Cluster 11:** Stress

**Number of genes:** 774

**Number of “good” genes:** 377

**Description** Enriched in response to water deprivation, and many motif from the AP2-EREBP transcription factor family

| Pathway                                     | Adj. p-value |
|---------------------------------------------|--------------|
| Phosphatidylinositol signaling system       | 0.012        |
| Protein processing in endoplasmic reticulum | 0.044        |

**Supplementary Table 118:** KEGG pathway enrichment - Root - Preflowering - Cluster 11 - Stress

| TF family  | No. in cluster | Total number | Percentage |
|------------|----------------|--------------|------------|
| CAMTA      | 2              | 2            | 100.00     |
| mTERF      | 1              | 1            | 100.00     |
| FAR1       | 1              | 2            | 50.00      |
| LOBAS2     | 3              | 13           | 23.08      |
| AP2EREBP   | 25             | 130          | 19.23      |
| E2FDP      | 1              | 7            | 14.29      |
| MYBrelated | 5              | 47           | 10.64      |
| HSF        | 1              | 16           | 6.25       |
| Trihelix   | 1              | 21           | 4.76       |
| TCP        | 1              | 23           | 4.35       |
| MYB        | 3              | 86           | 3.49       |
| bZIP       | 1              | 51           | 1.96       |
| NAC        | 1              | 86           | 1.16       |

**Supplementary Table 119:** Motif enrichment Root - Preflowering - Cluster 11 - Stress

| GO type | GO ID      | Description                                 | Adj. p-value |
|---------|------------|---------------------------------------------|--------------|
|         | GO:0048868 | pollen tube development                     | 0.000        |
|         | GO:0009790 | embryo development                          | 0.000        |
|         | GO:0009791 | post-embryonic development                  | 0.002        |
|         | GO:0040029 | regulation of gene expression, epigeneti... | 0.003        |
|         | GO:0006979 | response to oxidative stress                | 0.004        |
|         | GO:0048731 | system development                          | 0.007        |
|         | GO:0050793 | regulation of developmental process         | 0.007        |
|         | GO:0009415 | response to water                           | 0.007        |
|         | GO:0009414 | response to water deprivation               | 0.010        |
|         | GO:0009642 | response to light intensity                 | 0.013        |
|         | GO:0044255 | cellular lipid metabolic process            | 0.018        |
| BP      | GO:0009888 | tissue development                          | 0.020        |
|         | GO:0048608 | reproductive structure development          | 0.020        |
|         | GO:0009737 | response to abscisic acid                   | 0.024        |
|         | GO:0000302 | response to reactive oxygen species         | 0.032        |
|         | GO:0071470 | cellular response to osmotic stress         | 0.035        |
|         | GO:0104004 | cellular response to environmental stimu... | 0.047        |
|         | GO:0071214 | cellular response to abiotic stimulus       | 0.047        |
|         | GO:0006631 | fatty acid metabolic process                | 0.049        |
|         | GO:0006950 | response to stress                          | 0.051        |
|         | GO:0034614 | cellular response to reactive oxygen spe... | 0.053        |
|         | GO:0006833 | water transport                             | 0.059        |
|         | GO:0009741 | response to brassinosteroid                 | 0.064        |
| MF      | GO:0015250 | water channel activity                      | 0.040        |

**Supplementary Table 121:** GO term enrichment (filtered results) Root - Preflowering - Cluster 11 - Stress

### 3.4.10 Root - Preflowering - Cluster 12 - Defense response

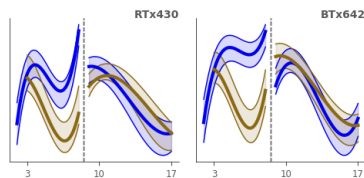

#### Overview

**Cluster 12:** Defense response

**Number of genes:** 1188

**Number of “good” genes:** 725

**Description** Contains 8 DREB1 genes.

| Pathway                                     | Adj. p-value |
|---------------------------------------------|--------------|
| Plant-pathogen interaction                  | 0.036        |
| Amino sugar and nucleotide sugar metabolism | 0.036        |

**Supplementary Table 122:** KEGG pathway enrichment - Root - Preflowering - Cluster 12 - Defense response

| TF family  | No. in cluster | Total number | Percentage |
|------------|----------------|--------------|------------|
| mTERF      | 1              | 1            | 100.00     |
| FAR1       | 2              | 2            | 100.00     |
| BZR        | 7              | 7            | 100.00     |
| NLP        | 1              | 1            | 100.00     |
| BES1       | 2              | 2            | 100.00     |
| HMG        | 2              | 2            | 100.00     |
| CAMTA      | 2              | 2            | 100.00     |
| AP2/EREBP  | 96             | 130          | 73.85      |
| bHLH       | 15             | 25           | 60.00      |
| LOBAS2     | 6              | 13           | 46.15      |
| E2FDP      | 2              | 7            | 28.57      |
| TCP        | 6              | 23           | 26.09      |
| Trihelix   | 4              | 21           | 19.05      |
| bZIP       | 7              | 51           | 13.73      |
| MYB        | 9              | 86           | 10.47      |
| C3H        | 1              | 10           | 10.00      |
| C2C2gata   | 1              | 18           | 5.56       |
| NAC        | 4              | 86           | 4.65       |
| C2H2       | 1              | 38           | 2.63       |
| MYBrelated | 1              | 47           | 2.13       |

**Supplementary Table 123:** Motif enrichment Root - Preflowering - Cluster 12 - Defense response

| GO type    | GO ID                        | Description                              | Adj. p-value |
|------------|------------------------------|------------------------------------------|--------------|
| BP         | GO:0009832                   | plant-type cell wall biogenesis          | 0.000        |
|            | GO:0009753                   | response to jasmonic acid                | 0.000        |
|            | GO:0009867                   | jasmonic acid mediated signaling pathway | 0.000        |
|            | GO:0009414                   | response to water deprivation            | 0.001        |
|            | GO:0009620                   | response to fungus                       | 0.002        |
|            | GO:0006950                   | response to stress                       | 0.002        |
|            | GO:0010345                   | suberin biosynthetic process             | 0.005        |
|            | GO:0031347                   | regulation of defense response           | 0.009        |
|            | GO:0006631                   | fatty acid metabolic process             | 0.009        |
|            | GO:0009695                   | jasmonic acid biosynthetic process       | 0.012        |
|            | GO:0010143                   | cutin biosynthetic process               | 0.015        |
|            | GO:0006820                   | anion transport                          | 0.036        |
|            | GO:0009751                   | response to salicylic acid               | 0.037        |
|            | GO:0042545                   | cell wall modification                   | 0.041        |
|            | GO:0050832                   | defense response to fungus               | 0.051        |
| GO:0006351 | transcription, DNA-templated | 0.080                                    |              |
| CC         | GO:0009523                   | photosystem II                           | 0.096        |
| MF         | GO:0016491                   | oxidoreductase activity                  | 0.000        |

**Supplementary Table 125:** GO term enrichment (filtered results) Root - Preflowering - Cluster 12 - Defense response

### 3.4.11 Root - Preflowering - Cluster 13 - Defense response

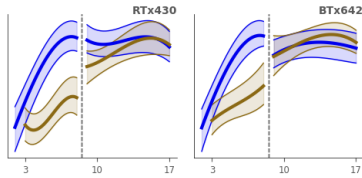

#### Overview

**Cluster 13:** Defense response

**Number of genes:** 1061

**Number of “good” genes:** 920

**Description** Contains many transcription factors and many motifs from the WRKY family

| Pathway                               | Adj. p-value |
|---------------------------------------|--------------|
| Biosynthesis of secondary metabolites | 0.002        |
| Tyrosine metabolism                   | 0.003        |
| Metabolic pathways                    | 0.003        |
| Plant hormone signal transduction     | 0.046        |

**Supplementary Table 126:** KEGG pathway enrichment - Root - Preflowering - Cluster 13 - Defense response

| TF family | No. in cluster | Total number | Percentage |
|-----------|----------------|--------------|------------|
| zfGRF     | 1              | 1            | 100.00     |
| WRKY      | 48             | 60           | 80.00      |
| ABI3VP1   | 1              | 9            | 11.11      |
| bZIP      | 4              | 51           | 7.84       |
| NAC       | 2              | 86           | 2.33       |

**Supplementary Table 127:** Motif enrichment Root - Preflowering - Cluster 13 - Defense response



| GO type | GO ID      | Description                                 | Adj. p-value |
|---------|------------|---------------------------------------------|--------------|
| BP      | GO:0009751 | response to salicylic acid                  | 0.000        |
|         | GO:0009753 | response to jasmonic acid                   | 0.002        |
|         | GO:0006749 | glutathione metabolic process               | 0.005        |
|         | GO:0009867 | jasmonic acid mediated signaling pathway    | 0.008        |
|         | GO:0044550 | secondary metabolite biosynthetic proces... | 0.013        |
|         | GO:0006820 | anion transport                             | 0.061        |
| MF      | GO:0004364 | glutathione transferase activity            | 0.002        |
|         | GO:0010427 | abscisic acid binding                       | 0.052        |
|         | GO:0016491 | oxidoreductase activity                     | 0.077        |

**Supplementary Table 129:** GO term enrichment (filtered results) Root - Preflowering - Cluster 13 - Defense response

### 3.4.12 Root - Preflowering - Cluster 14 - C2C2dof

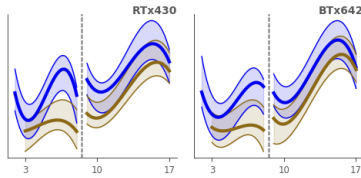

#### Overview

**Cluster 14:** C2C2dof

**Number of genes:** 1654

**Number of “good” genes:** 713

| Pathway     | Adj. p-value |
|-------------|--------------|
| Ribosome    | 0.000        |
| Spliceosome | 0.008        |

**Supplementary Table 130:** KEGG pathway enrichment - Root - Preflowering - Cluster 14 - C2C2dof

| TF family | No. in cluster | Total number | Percentage |
|-----------|----------------|--------------|------------|
| REM       | 2              | 2            | 100.00     |
| C2C2YABBY | 1              | 2            | 50.00      |
| C2C2dof   | 15             | 39           | 38.46      |
| C3H       | 2              | 10           | 20.00      |
| ABI3VP1   | 1              | 9            | 11.11      |
| TCP       | 1              | 23           | 4.35       |
| NAC       | 2              | 86           | 2.33       |

**Supplementary Table 131:** Motif enrichment Root - Preflowering - Cluster 14 - C2C2dof

| GO type | GO ID      | Description                                 | Adj. p-value |
|---------|------------|---------------------------------------------|--------------|
| BP      | GO:0006351 | transcription, DNA-templated                | 0.010        |
|         | GO:0010468 | regulation of gene expression               | 0.016        |
|         | GO:1901607 | alpha-amino acid biosynthetic process       | 0.026        |
|         | GO:0008652 | cellular amino acid biosynthetic process    | 0.057        |
|         | GO:0009073 | aromatic amino acid family biosynthetic ... | 0.077        |
| MF      | GO:0010427 | abscisic acid binding                       | 0.071        |
|         | GO:0004364 | glutathione transferase activity            | 0.086        |

**Supplementary Table 133:** GO term enrichment (filtered results) Root - Preflowering - Cluster 14 - C2C2dof

### 3.4.13 Root - Preflowering - Cluster 15 - Stress

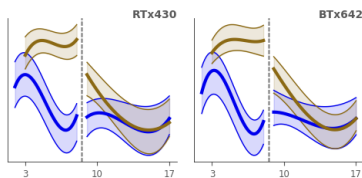

#### Overview

**Cluster 15:** Stress

**Number of genes:** 1426

**Number of “good” genes:** 1066

**Description** Enriched in motifs from the AP2/EREBP family

| Pathway            | Adj. p-value |
|--------------------|--------------|
| Metabolic pathways | 0.001        |

**Supplementary Table 134:** KEGG pathway enrichment - Root - Preflowering - Cluster 15 - Stress

| TF family  | No. in cluster | Total number | Percentage |
|------------|----------------|--------------|------------|
| BSD        | 1              | 1.0          | 100.00     |
| PLATZ      | 1              | 1.0          | 100.00     |
| S1F alike  | 1              | 1.0          | 100.00     |
| HSF        | 11             | 16.0         | 68.75      |
| AP2EREBP   | 46             | 130.0        | 35.38      |
| Orphan     | 1              | 3.0          | 33.33      |
| CPP        | 2              | 7.0          | 28.57      |
| Trihelix   | 4              | 21.0         | 19.05      |
| ARID       | 1              | 6.0          | 16.67      |
| ND         | 1              | 6.0          | 16.67      |
| C2C2dof    | 4              | 39.0         | 10.26      |
| C3H        | 1              | 10.0         | 10.00      |
| bHLH       | 2              | 25.0         | 8.00       |
| LOBAS2     | 1              | 13.0         | 7.69       |
| TCP        | 1              | 23.0         | 4.35       |
| MYBrelated | 1              | 47.0         | 2.13       |
| bZIP       | 1              | 51.0         | 1.96       |
| NAC        | 1              | 86.0         | 1.16       |
| ARF_ecoli  | 1              | NaN          | NaN        |

**Supplementary Table 135:** Motif enrichment Root - Preflowering - Cluster 15 - Stress

| GO type | GO ID      | Description                                 | Adj. p-value |
|---------|------------|---------------------------------------------|--------------|
|         | GO:0003006 | developmental process involved in reprod... | 0.000        |
|         | GO:0009791 | post-embryonic development                  | 0.000        |
|         | GO:0040029 | regulation of gene expression, epigeneti... | 0.000        |
|         | GO:0006260 | DNA replication                             | 0.000        |
|         | GO:0048868 | pollen tube development                     | 0.000        |
|         | GO:0048608 | reproductive structure development          | 0.000        |
|         | GO:0050793 | regulation of developmental process         | 0.000        |
|         | GO:0042542 | response to hydrogen peroxide               | 0.002        |
|         | GO:0006629 | lipid metabolic process                     | 0.003        |
|         | GO:0009888 | tissue development                          | 0.003        |
|         | GO:0006306 | DNA methylation                             | 0.004        |
|         | GO:0006342 | chromatin silencing                         | 0.005        |
| BP      | GO:0009642 | response to light intensity                 | 0.008        |
|         | GO:0044255 | cellular lipid metabolic process            | 0.011        |
|         | GO:0000302 | response to reactive oxygen species         | 0.020        |
|         | GO:0009741 | response to brassinosteroid                 | 0.021        |
|         | GO:0104004 | cellular response to environmental stimu... | 0.037        |
|         | GO:0071214 | cellular response to abiotic stimulus       | 0.037        |
|         | GO:0009908 | flower development                          | 0.038        |
|         | GO:0009415 | response to water                           | 0.057        |
|         | GO:0010608 | posttranscriptional regulation of gene e... | 0.057        |
|         | GO:0006631 | fatty acid metabolic process                | 0.068        |
|         | GO:0009414 | response to water deprivation               | 0.073        |
|         | GO:0006979 | response to oxidative stress                | 0.079        |
|         | GO:0006950 | response to stress                          | 0.083        |
| MF      | GO:0015250 | water channel activity                      | 0.074        |

**Supplementary Table 137:** GO term enrichment (filtered results) Root - Preflowering - Cluster 15 - Stress

### 3.4.14 Root - Preflowering - Cluster 16 - Stress and gene regulation

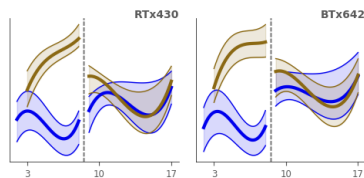

#### Overview

**Cluster 16:** Stress and gene regulation

**Number of genes:** 1683

**Number of “good” genes:** 952

**Description** Highly enriched in motifs from the C2C2-dof transcription factors family

| Pathway                           | Adj. p-value |
|-----------------------------------|--------------|
| Spliceosome                       | 0.000        |
| Basal transcription factors       | 0.002        |
| Ribosome biogenesis in eukaryotes | 0.003        |
| Aminoacyl-tRNA biosynthesis       | 0.006        |
| Ubiquitin mediated proteolysis    | 0.011        |
| RNA polymerase                    | 0.014        |
| Mismatch repair                   | 0.017        |
| Nucleotide excision repair        | 0.022        |

**Supplementary Table 138:** KEGG pathway enrichment - Root - Preflowering - Cluster 16 - Stress and gene regulation

| TF family  | No. in cluster | Total number | Percentage |
|------------|----------------|--------------|------------|
| REM        | 2              | 2            | 100.00     |
| C2C2dof    | 31             | 39           | 79.49      |
| RAV        | 1              | 2            | 50.00      |
| ARF        | 1              | 3            | 33.33      |
| Orphan     | 1              | 3            | 33.33      |
| ABI3VP1    | 2              | 9            | 22.22      |
| CPP        | 1              | 7            | 14.29      |
| C3H        | 1              | 10           | 10.00      |
| MADS       | 1              | 14           | 7.14       |
| MYBrelated | 3              | 47           | 6.38       |
| G2like     | 1              | 29           | 3.45       |
| MYB        | 1              | 86           | 1.16       |
| NAC        | 1              | 86           | 1.16       |

**Supplementary Table 139:** Motif enrichment Root - Preflowering - Cluster 16 - Stress and gene regulation

| GO type | GO ID      | Description                                 | Adj. p-value |
|---------|------------|---------------------------------------------|--------------|
|         | GO:0040029 | regulation of gene expression, epigeneti... | 0.000        |
|         | GO:0003006 | developmental process involved in reprod... | 0.000        |
|         | GO:0009791 | post-embryonic development                  | 0.000        |
|         | GO:0010154 | fruit development                           | 0.000        |
|         | GO:0006306 | DNA methylation                             | 0.000        |
|         | GO:0006260 | DNA replication                             | 0.000        |
|         | GO:0009642 | response to light intensity                 | 0.000        |
| BP      | GO:0006342 | chromatin silencing                         | 0.001        |
|         | GO:0010468 | regulation of gene expression               | 0.001        |
|         | GO:0043484 | regulation of RNA splicing                  | 0.002        |
|         | GO:0009908 | flower development                          | 0.002        |
|         | GO:0006950 | response to stress                          | 0.009        |
|         | GO:0009737 | response to abscisic acid                   | 0.012        |
|         | GO:0009414 | response to water deprivation               | 0.032        |
|         | GO:0009415 | response to water                           | 0.035        |
| MF      | GO:0031072 | heat shock protein binding                  | 0.052        |

**Supplementary Table 141:** GO term enrichment (filtered results) Root - Preflowering - Cluster 16 - Stress and gene regulation

### 3.4.15 Root - Preflowering - Cluster 17 - Gene regulation

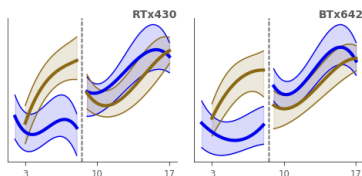

#### Overview

**Cluster 17:** Gene regulation

**Number of genes:** 2439

**Number of “good” genes:** 1412

**Description** Highly enriched in motifs from the C2C2-dof transcription factors family

| Pathway                           | Adj. p-value |
|-----------------------------------|--------------|
| Spliceosome                       | 0.000        |
| RNA transport                     | 0.010        |
| Ribosome biogenesis in eukaryotes | 0.013        |
| Basal transcription factors       | 0.013        |
| Nucleotide excision repair        | 0.022        |
| Autophagy - other                 | 0.022        |
| Base excision repair              | 0.039        |

**Supplementary Table 142:** KEGG pathway enrichment - Root - Preflowering - Cluster 17 - Gene regulation

| TF family  | No. in cluster | Total number | Percentage |
|------------|----------------|--------------|------------|
| REM        | 2              | 2            | 100.00     |
| C2C2dof    | 30             | 39           | 76.92      |
| ABI3VP1    | 5              | 9            | 55.56      |
| SRS        | 1              | 2            | 50.00      |
| ARF        | 1              | 3            | 33.33      |
| Orphan     | 1              | 3            | 33.33      |
| MADS       | 4              | 14           | 28.57      |
| BBRBPC     | 1              | 5            | 20.00      |
| C3H        | 2              | 10           | 20.00      |
| MYBrelated | 5              | 47           | 10.64      |
| C2H2       | 4              | 38           | 10.53      |
| Trihelix   | 1              | 21           | 4.76       |
| G2like     | 1              | 29           | 3.45       |
| MYB        | 1              | 86           | 1.16       |
| NAC        | 1              | 86           | 1.16       |

**Supplementary Table 143:** Motif enrichment Root - Preflowering - Cluster 17 - Gene regulation

| GO type | GO ID      | Description                                 | Adj. p-value |
|---------|------------|---------------------------------------------|--------------|
|         | GO:0010468 | regulation of gene expression               | 0.000        |
|         | GO:0010608 | posttranscriptional regulation of gene e... | 0.000        |
|         | GO:0016458 | gene silencing                              | 0.001        |
| BP      | GO:0015994 | chlorophyll metabolic process               | 0.005        |
|         | GO:0040029 | regulation of gene expression, epigeneti... | 0.006        |
|         | GO:0015979 | photosynthesis                              | 0.033        |
|         | GO:0010109 | regulation of photosynthesis                | 0.089        |

**Supplementary Table 145:** GO term enrichment (filtered results) Root - Preflowering - Cluster 17 - Gene regulation



### 3.4.16 Root - Preflowering - Cluster 19 - AMF-pre

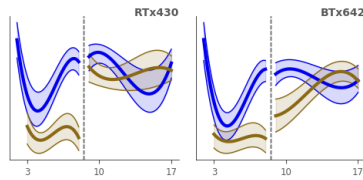

#### Overview

**Cluster 19:** AMF-pre

**Number of genes:** 496

**Number of “good” genes:** 275

No pathways found enriched

**Supplementary Table 146:** KEGG pathway enrichment - Root - Preflowering - Cluster 19 - AMF-pre

| TF family | No. in cluster | Total number | Percentage |
|-----------|----------------|--------------|------------|
| C2C2gata  | 1              | 18           | 5.56       |
| MYB       | 3              | 86           | 3.49       |
| G2like    | 1              | 29           | 3.45       |

**Supplementary Table 147:** Motif enrichment Root - Preflowering - Cluster 19 - AMF-pre

| GO type | GO ID      | Description                      | Adj. p-value |
|---------|------------|----------------------------------|--------------|
| BP      | GO:0009753 | response to jasmonic acid        | 0.032        |
|         | GO:0009751 | response to salicylic acid       | 0.049        |
|         | GO:0006820 | anion transport                  | 0.077        |
|         | GO:0006749 | glutathione metabolic process    | 0.090        |
| MF      | GO:0004364 | glutathione transferase activity | 0.014        |
|         | GO:0010427 | abscisic acid binding            | 0.029        |

**Supplementary Table 149:** GO term enrichment (filtered results) Root - Preflowering - Cluster 19 - AMF-pre

### 3.4.17 Root - Preflowering - Cluster 20 - Development

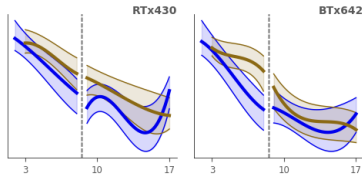

#### Overview

**Cluster 20:** Development

**Number of genes:** 2017

**Number of “good” genes:** 1604

| Pathway                               | Adj. p-value |
|---------------------------------------|--------------|
| Metabolic pathways                    | 0.000        |
| Phagosome                             | 0.000        |
| Biosynthesis of secondary metabolites | 0.000        |
| Other glycan degradation              | 0.004        |
| Steroid biosynthesis                  | 0.020        |
| 2-Oxocarboxylic acid metabolism       | 0.040        |

**Supplementary Table 150:** KEGG pathway enrichment - Root - Preflowering - Cluster 20 - Development

| TF family | No. in cluster | Total number | Percentage |
|-----------|----------------|--------------|------------|
| BZR       | 5              | 7            | 71.43      |
| ZFHD      | 7              | 11           | 63.64      |
| FAR1      | 1              | 2            | 50.00      |
| bHLH      | 12             | 25           | 48.00      |
| SBP       | 2              | 13           | 15.38      |
| bZIP      | 7              | 51           | 13.73      |
| C2H2      | 3              | 38           | 7.89       |
| HB        | 1              | 16           | 6.25       |
| NAC       | 1              | 86           | 1.16       |

**Supplementary Table 151:** Motif enrichment Root - Preflowering - Cluster 20 - Development

| GO type | GO ID      | Description                                 | Adj. p-value |
|---------|------------|---------------------------------------------|--------------|
| BP      | GO:0009832 | plant-type cell wall biogenesis             | 0.000        |
|         | GO:0048868 | pollen tube development                     | 0.000        |
|         | GO:0040007 | growth                                      | 0.000        |
|         | GO:0006260 | DNA replication                             | 0.000        |
|         | GO:0009790 | embryo development                          | 0.000        |
|         | GO:0009888 | tissue development                          | 0.000        |
|         | GO:0009791 | post-embryonic development                  | 0.000        |
|         | GO:0010154 | fruit development                           | 0.001        |
|         | GO:0048731 | system development                          | 0.002        |
|         | GO:0040029 | regulation of gene expression, epigeneti... | 0.002        |
|         | GO:0048608 | reproductive structure development          | 0.003        |
|         | GO:0072593 | reactive oxygen species metabolic proces... | 0.003        |
|         | GO:0006631 | fatty acid metabolic process                | 0.003        |
|         | GO:0006270 | DNA replication initiation                  | 0.004        |
|         | GO:0006833 | water transport                             | 0.006        |
|         | GO:0044255 | cellular lipid metabolic process            | 0.008        |
|         | GO:0006979 | response to oxidative stress                | 0.022        |
|         | GO:0009628 | response to abiotic stimulus                | 0.023        |
|         | GO:0042542 | response to hydrogen peroxide               | 0.035        |
|         | GO:0042545 | cell wall modification                      | 0.037        |
| MF      | GO:0016787 | hydrolase activity                          | 0.000        |
|         | GO:0015250 | water channel activity                      | 0.004        |

**Supplementary Table 153:** GO term enrichment (filtered results) Root - Preflowering - Cluster 20 - Development

### 3.5 Root Postflowering clusters

#### 3.5.1 Root - Postflowering - Cluster 1 - Stress

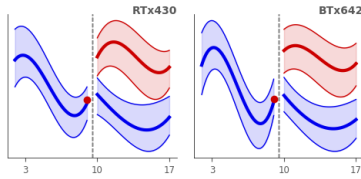

#### Overview

**Cluster 1:** Stress

**Number of genes:** 1817

**Number of “good” genes:** 739

**Description** Highly enriched in heat-shock proteins

| Pathway                                    | Adj. p-value |
|--------------------------------------------|--------------|
| Metabolic pathways                         | 0.000        |
| Valine, leucine and isoleucine degradation | 0.007        |
| Phagosome                                  | 0.007        |
| Fatty acid degradation                     | 0.010        |
| Oxidative phosphorylation                  | 0.010        |
| Carbon metabolism                          | 0.023        |
| Terpenoid backbone biosynthesis            | 0.040        |
| Arginine and proline metabolism            | 0.040        |

**Supplementary Table 154:** KEGG pathway enrichment - Root - Postflowering - Cluster 1 - Stress

| TF family | No. in cluster | Total number | Percentage |
|-----------|----------------|--------------|------------|
| BSD       | 1              | 1            | 100.00     |
| PLATZ     | 1              | 1            | 100.00     |
| S1Falike  | 1              | 1            | 100.00     |
| HSF       | 10             | 16           | 62.50      |
| Orphan    | 1              | 3            | 33.33      |
| BZR       | 2              | 7            | 28.57      |
| bHLH      | 7              | 25           | 28.00      |
| bZIP      | 9              | 51           | 17.65      |
| ND        | 1              | 6            | 16.67      |
| C3H       | 1              | 10           | 10.00      |
| AP2EREBP  | 10             | 130          | 7.69       |

**Supplementary Table 155:** Motif enrichment Root - Postflowering - Cluster 1 - Stress

| GO type | GO ID      | Description                                 | Adj. p-value |
|---------|------------|---------------------------------------------|--------------|
| BP      | GO:0003006 | developmental process involved in reprod... | 0.000        |
|         | GO:0009642 | response to light intensity                 | 0.000        |
|         | GO:0048608 | reproductive structure development          | 0.000        |
|         | GO:0010154 | fruit development                           | 0.000        |
|         | GO:0048316 | seed development                            | 0.001        |
|         | GO:0006629 | lipid metabolic process                     | 0.004        |
|         | GO:0034599 | cellular response to oxidative stress       | 0.004        |
|         | GO:0048868 | pollen tube development                     | 0.008        |
|         | GO:0044255 | cellular lipid metabolic process            | 0.009        |
|         | GO:0006631 | fatty acid metabolic process                | 0.018        |
|         | GO:0043484 | regulation of RNA splicing                  | 0.018        |
|         | GO:0034614 | cellular response to reactive oxygen spe... | 0.029        |
|         | GO:0009908 | flower development                          | 0.038        |
|         | GO:0009737 | response to abscisic acid                   | 0.040        |
| MF      | GO:0031072 | heat shock protein binding                  | 0.082        |

**Supplementary Table 157:** GO term enrichment (filtered results) Root - Postflowering - Cluster 1 - Stress

### 3.5.2 Root - Postflowering - Cluster 2 - AMF-post

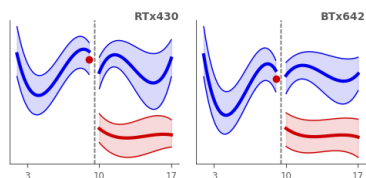

#### Overview

**Cluster 2:** AMF-post

**Number of genes:** 807

**Number of “good” genes:** 565

| Pathway                               | Adj. p-value |
|---------------------------------------|--------------|
| Metabolic pathways                    | 0.021        |
| Biosynthesis of secondary metabolites | 0.035        |

**Supplementary Table 158:** KEGG pathway enrichment - Root - Postflowering - Cluster 2 - AMF-post

| TF family | No. in cluster | Total number | Percentage |
|-----------|----------------|--------------|------------|
| MYB       | 7              | 86           | 8.14       |
| WRKY      | 1              | 60           | 1.67       |

**Supplementary Table 159:** Motif enrichment Root - Postflowering - Cluster 2 - AMF-post

| GO type | GO ID      | Description                     | Adj. p-value |
|---------|------------|---------------------------------|--------------|
| BP      | GO:0042546 | cell wall biogenesis            | 0.000        |
|         | GO:0009832 | plant-type cell wall biogenesis | 0.000        |
|         | GO:0009733 | response to auxin               | 0.041        |
|         | GO:0009813 | flavonoid biosynthetic process  | 0.043        |
|         | GO:0010345 | suberin biosynthetic process    | 0.057        |
|         | GO:0006629 | lipid metabolic process         | 0.078        |
| MF      | GO:0016491 | oxidoreductase activity         | 0.000        |
|         | GO:0010427 | abscisic acid binding           | 0.042        |
|         | GO:0015250 | water channel activity          | 0.099        |

**Supplementary Table 161:** GO term enrichment (filtered results) Root - Postflowering - Cluster 2 - AMF-post

### 3.5.3 Root - Postflowering - Cluster 3 - Cell wall biogenesis

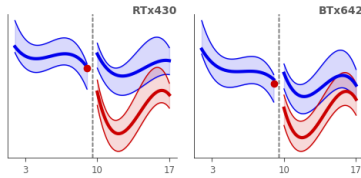

#### Overview

**Cluster 3:** Cell wall biogenesis

**Number of genes:** 1607

**Number of “good” genes:** 888

| Pathway                                  | Adj. p-value |
|------------------------------------------|--------------|
| Metabolic pathways                       | 0.000        |
| Biosynthesis of amino acids              | 0.002        |
| Ribosome                                 | 0.002        |
| N-Glycan biosynthesis                    | 0.004        |
| DNA replication                          | 0.004        |
| Carbon metabolism                        | 0.009        |
| Biosynthesis of secondary metabolites    | 0.026        |
| Pentose phosphate pathway                | 0.043        |
| Glycine, serine and threonine metabolism | 0.043        |
| Proteasome                               | 0.043        |

**Supplementary Table 162:** KEGG pathway enrichment - Root - Postflowering - Cluster 3 - Cell wall biogenesis

| TF family | No. in cluster | Total number | Percentage |
|-----------|----------------|--------------|------------|
| MYB       | 1              | 86           | 1.16       |

**Supplementary Table 163:** Motif enrichment Root - Postflowering - Cluster 3 - Cell wall biogenesis

| GO type | GO ID      | Description                                 | Adj. p-value |
|---------|------------|---------------------------------------------|--------------|
| BP      | GO:0042546 | cell wall biogenesis                        | 0.000        |
|         | GO:0044550 | secondary metabolite biosynthetic proces... | 0.000        |
|         | GO:0009832 | plant-type cell wall biogenesis             | 0.000        |
|         | GO:0006260 | DNA replication                             | 0.000        |
|         | GO:0042545 | cell wall modification                      | 0.004        |
|         | GO:0009888 | tissue development                          | 0.005        |
|         | GO:0048869 | cellular developmental process              | 0.009        |
|         | GO:0006631 | fatty acid metabolic process                | 0.015        |
|         | GO:0009733 | response to auxin                           | 0.066        |
|         | GO:0010345 | suberin biosynthetic process                | 0.069        |
|         | GO:0006979 | response to oxidative stress                | 0.094        |
| MF      | GO:0016491 | oxidoreductase activity                     | 0.000        |
|         | GO:0015250 | water channel activity                      | 0.035        |

**Supplementary Table 165:** GO term enrichment (filtered results) Root - Postflowering - Cluster 3 - Cell wall biogenesis



### 3.5.4 Root - Postflowering - Cluster 4 - Secondary metabolites

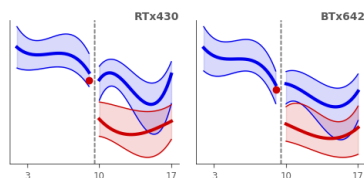

#### Overview

**Cluster 4:** Secondary metabolites

**Number of genes:** 2045

**Number of “good” genes:** 1447

| Pathway                                     | Adj. p-value |
|---------------------------------------------|--------------|
| Metabolic pathways                          | 0.000        |
| Biosynthesis of secondary metabolites       | 0.001        |
| Amino sugar and nucleotide sugar metabolism | 0.001        |

**Supplementary Table 166:** KEGG pathway enrichment - Root - Postflowering - Cluster 4 - Secondary metabolites

| TF family | No. in cluster | Total number | Percentage |
|-----------|----------------|--------------|------------|
| NLP       | 1              | 1            | 100.00     |
| BZR       | 4              | 7            | 57.14      |
| BES1      | 1              | 2            | 50.00      |
| CAMTA     | 1              | 2            | 50.00      |
| MYB       | 26             | 86           | 30.23      |
| bHLH      | 4              | 25           | 16.00      |
| TCP       | 1              | 23           | 4.35       |
| C2H2      | 1              | 38           | 2.63       |

**Supplementary Table 167:** Motif enrichment Root - Postflowering - Cluster 4 - Secondary metabolites

| GO type    | GO ID      | Description                                 | Adj. p-value            |
|------------|------------|---------------------------------------------|-------------------------|
| BP         | GO:0009832 | plant-type cell wall biogenesis             | 0.000                   |
|            | GO:0044550 | secondary metabolite biosynthetic proces... | 0.000                   |
|            | GO:0006270 | DNA replication initiation                  | 0.002                   |
|            | GO:0009888 | tissue development                          | 0.003                   |
|            | GO:0008610 | lipid biosynthetic process                  | 0.004                   |
|            | GO:0048869 | cellular developmental process              | 0.011                   |
|            | GO:0006260 | DNA replication                             | 0.014                   |
|            | GO:0010345 | suberin biosynthetic process                | 0.019                   |
|            | GO:0006833 | water transport                             | 0.023                   |
|            | GO:0009695 | jasmonic acid biosynthetic process          | 0.028                   |
|            | GO:0006979 | response to oxidative stress                | 0.029                   |
|            | GO:0060548 | negative regulation of cell death           | 0.059                   |
|            | MF         | GO:0016491                                  | oxidoreductase activity |
| GO:0015250 |            | water channel activity                      | 0.006                   |
| GO:0004364 |            | glutathione transferase activity            | 0.097                   |

**Supplementary Table 169:** GO term enrichment (filtered results) Root - Postflowering - Cluster 4 - Secondary metabolites

### 3.5.5 Root - Postflowering - Cluster 6 - Response to ethylene

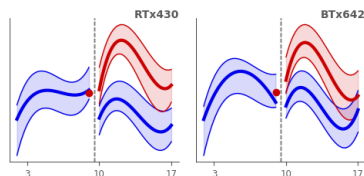

#### Overview

**Cluster 6:** Response to ethylene

**Number of genes:** 1427

**Number of “good” genes:** 293

**Description** Enriched in heat-shock proteins

| Pathway                               | Adj. p-value |
|---------------------------------------|--------------|
| Metabolic pathways                    | 0.000        |
| Galactose metabolism                  | 0.000        |
| Biosynthesis of secondary metabolites | 0.000        |
| Carbon metabolism                     | 0.020        |

**Supplementary Table 170:** KEGG pathway enrichment - Root - Postflowering - Cluster 6 - Response to ethylene

| TF family  | No. in cluster | Total number | Percentage |
|------------|----------------|--------------|------------|
| BSD        | 1              | 1            | 100.00     |
| PLATZ      | 1              | 1            | 100.00     |
| S1Falike   | 1              | 1            | 100.00     |
| HSF        | 9              | 16           | 56.25      |
| BES1       | 1              | 2            | 50.00      |
| Orphan     | 1              | 3            | 33.33      |
| BZR        | 2              | 7            | 28.57      |
| E2FDP      | 2              | 7            | 28.57      |
| bHLH       | 3              | 25           | 12.00      |
| TCP        | 1              | 23           | 4.35       |
| MYBrelated | 2              | 47           | 4.26       |
| bZIP       | 1              | 51           | 1.96       |

**Supplementary Table 171:** Motif enrichment Root - Postflowering - Cluster 6 - Response to ethylene

| GO type | GO ID      | Description                         | Adj. p-value |
|---------|------------|-------------------------------------|--------------|
|         | GO:0009723 | response to ethylene                | 0.013        |
| BP      | GO:0010150 | leaf senescence                     | 0.039        |
|         | GO:0050793 | regulation of developmental process | 0.047        |

**Supplementary Table 173:** GO term enrichment (filtered results) Root - Postflowering - Cluster 6 - Response to ethylene

### 3.5.6 Root - Postflowering - Cluster 7 - Defense

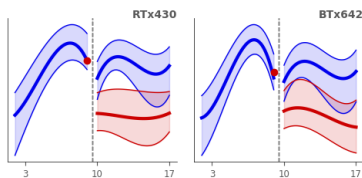

#### Overview

**Cluster 7:** Defense

**Number of genes:** 1451

**Number of “good” genes:** 762

**Description** Enriched in WRKY motifs., response to jasmonic acid, auxin, and biotic stimulus

| Pathway            | Adj. p-value |
|--------------------|--------------|
| Metabolic pathways | 0.018        |

**Supplementary Table 174:** KEGG pathway enrichment - Root - Postflowering - Cluster 7 - Defense

| TF family | No. in cluster | Total number | Percentage |
|-----------|----------------|--------------|------------|
| NLP       | 1              | 1            | 100.00     |
| WRKY      | 25             | 60           | 41.67      |
| SBP       | 3              | 13           | 23.08      |
| ABI3VP1   | 1              | 9            | 11.11      |
| bZIP      | 1              | 51           | 1.96       |

**Supplementary Table 175:** Motif enrichment Root - Postflowering - Cluster 7 - Defense

| GO type | GO ID      | Description                          | Adj. p-value |
|---------|------------|--------------------------------------|--------------|
| BP      | GO:0071554 | cell wall organization or biogenesis | 0.000        |
|         | GO:0009753 | response to jasmonic acid            | 0.001        |
|         | GO:0009809 | lignin biosynthetic process          | 0.012        |
|         | GO:0006749 | glutathione metabolic process        | 0.016        |
|         | GO:0009691 | cytokinin biosynthetic process       | 0.021        |
|         | GO:0009733 | response to auxin                    | 0.038        |
| MF      | GO:0009607 | response to biotic stimulus          | 0.091        |
|         | GO:0004364 | glutathione transferase activity     | 0.002        |
|         | GO:0010427 | abscisic acid binding                | 0.008        |

**Supplementary Table 177:** GO term enrichment (filtered results) Root - Postflowering - Cluster 7 - Defense

### 3.5.7 Root - Postflowering - Cluster 8 - Cell wall, and DNA replication

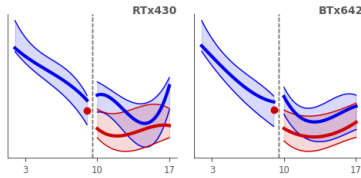

#### Overview

**Cluster 8:** Cell wall, and DNA replication

**Number of genes:** 3661

**Number of “good” genes:** 2694

| Pathway                                     | Adj. p-value |
|---------------------------------------------|--------------|
| Metabolic pathways                          | 0.000        |
| Carbon metabolism                           | 0.000        |
| Biosynthesis of secondary metabolites       | 0.000        |
| Citrate cycle (TCA cycle)                   | 0.000        |
| Oxidative phosphorylation                   | 0.000        |
| Phagosome                                   | 0.000        |
| Amino sugar and nucleotide sugar metabolism | 0.003        |
| Glycolysis / Gluconeogenesis                | 0.005        |
| Propanoate metabolism                       | 0.006        |
| Pentose phosphate pathway                   | 0.007        |
| Steroid biosynthesis                        | 0.010        |
| Fatty acid metabolism                       | 0.010        |
| Biosynthesis of amino acids                 | 0.014        |
| Galactose metabolism                        | 0.023        |
| Fatty acid biosynthesis                     | 0.027        |
| Glyoxylate and dicarboxylate metabolism     | 0.035        |

**Supplementary Table 178:** KEGG pathway enrichment - Root - Postflowering - Cluster 8 - Cell wall, and DNA replication

| TF family | No. in cluster | Total number | Percentage |
|-----------|----------------|--------------|------------|
| CCAATHAP3 | 1              | 2            | 50.00      |
| bHLH      | 5              | 25           | 20.00      |
| SBP       | 2              | 13           | 15.38      |
| C2H2      | 2              | 38           | 5.26       |

**Supplementary Table 179:** Motif enrichment Root - Postflowering - Cluster 8 - Cell wall, and DNA replication

| GO type | GO ID      | Description                                 | Adj. p-value |
|---------|------------|---------------------------------------------|--------------|
|         | GO:0009832 | plant-type cell wall biogenesis             | 0.000        |
|         | GO:0044550 | secondary metabolite biosynthetic proces... | 0.000        |
|         | GO:0042545 | cell wall modification                      | 0.002        |
|         | GO:0006260 | DNA replication                             | 0.003        |
|         | GO:0009888 | tissue development                          | 0.005        |
| BP      | GO:0006833 | water transport                             | 0.007        |
|         | GO:0044255 | cellular lipid metabolic process            | 0.011        |
|         | GO:0040007 | growth                                      | 0.021        |
|         | GO:0006979 | response to oxidative stress                | 0.021        |
|         | GO:0010345 | suberin biosynthetic process                | 0.033        |
|         | GO:0048638 | regulation of developmental growth          | 0.075        |
|         | GO:0016787 | hydrolase activity                          | 0.000        |
| MF      | GO:0016491 | oxidoreductase activity                     | 0.000        |
|         | GO:0015250 | water channel activity                      | 0.003        |

**Supplementary Table 181:** GO term enrichment (filtered results) Root - Postflowering - Cluster 8 - Cell wall, and DNA replication

### 3.5.8 Root - Postflowering - Cluster 9 - Gene regulation

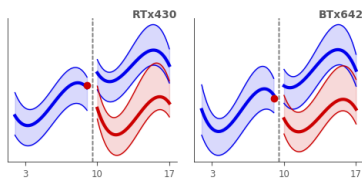

#### Overview

**Cluster 9:** Gene regulation

**Number of genes:** 2004

**Number of “good” genes:** 615

| Pathway            | Adj. p-value |
|--------------------|--------------|
| Metabolic pathways | 0.038        |

**Supplementary Table 182:** KEGG pathway enrichment - Root - Postflowering - Cluster 9 - Gene regulation

| TF family | No. in cluster | Total number | Percentage |
|-----------|----------------|--------------|------------|
| REM       | 1              | 2            | 50.00      |
| C2C2dof   | 8              | 39           | 20.51      |
| ABI3VP1   | 1              | 9            | 11.11      |

**Supplementary Table 183:** Motif enrichment Root - Postflowering - Cluster 9 - Gene regulation

| GO type | GO ID      | Description                                 | Adj. p-value |
|---------|------------|---------------------------------------------|--------------|
| BP      | GO:0006351 | transcription, DNA-templated                | 0.000        |
|         | GO:0010468 | regulation of gene expression               | 0.000        |
|         | GO:0044550 | secondary metabolite biosynthetic proces... | 0.016        |
|         | GO:0009073 | aromatic amino acid family biosynthetic ... | 0.037        |
| MF      | GO:0006820 | anion transport                             | 0.080        |
|         | GO:0010427 | abscisic acid binding                       | 0.025        |

**Supplementary Table 185:** GO term enrichment (filtered results) Root - Postflowering - Cluster 9 - Gene regulation



### 3.5.9 Root - Postflowering - Cluster 10 - Gene regulation, and DNA replication

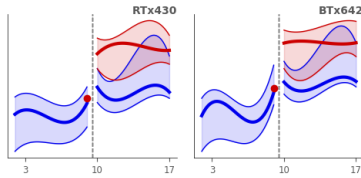

#### Overview

**Cluster 10:** Gene regulation, and DNA replication

**Number of genes:** 5725

**Number of “good” genes:** 3119

**Description** Enriched in many GO terms associated with gene silencing, epigenetic regulation, and regulation of gene expression. Highly enriched in C2C2dof motifs)

| Pathway                              | Adj. p-value |
|--------------------------------------|--------------|
| Spliceosome                          | 0.000        |
| Basal transcription factors          | 0.000        |
| Ribosome biogenesis in eukaryotes    | 0.000        |
| RNA transport                        | 0.000        |
| Nucleotide excision repair           | 0.000        |
| mRNA surveillance pathway            | 0.001        |
| Porphyrin and chlorophyll metabolism | 0.002        |
| Aminoacyl-tRNA biosynthesis          | 0.007        |
| Autophagy - other                    | 0.008        |
| Mismatch repair                      | 0.042        |

**Supplementary Table 186:** KEGG pathway enrichment - Root - Postflowering - Cluster 10 - Gene regulation, and DNA replication

| TF family  | No. in cluster | Total number | Percentage |
|------------|----------------|--------------|------------|
| CPP        | 7              | 7            | 100.00     |
| REM        | 2              | 2            | 100.00     |
| C2C2dof    | 33             | 39           | 84.62      |
| ABI3VP1    | 5              | 9            | 55.56      |
| C3H        | 5              | 10           | 50.00      |
| SRS        | 1              | 2            | 50.00      |
| ARF        | 1              | 3            | 33.33      |
| Orphan     | 1              | 3            | 33.33      |
| MYBrelated | 13             | 47           | 27.66      |
| ARID       | 1              | 6            | 16.67      |
| ND         | 1              | 6            | 16.67      |
| MADS       | 2              | 14           | 14.29      |
| ZFHD       | 1              | 11           | 9.09       |
| C2H2       | 2              | 38           | 5.26       |
| MYB        | 1              | 86           | 1.16       |
| NAC        | 1              | 86           | 1.16       |

**Supplementary Table 187:** Motif enrichment Root - Postflowering - Cluster 10 - Gene regulation, and DNA replication

| GO type | GO ID      | Description                                 | Adj. p-value |
|---------|------------|---------------------------------------------|--------------|
|         | GO:0010468 | regulation of gene expression               | 0.000        |
|         | GO:0019684 | photosynthesis, light reaction              | 0.000        |
|         | GO:0009628 | response to abiotic stimulus                | 0.000        |
|         | GO:0006351 | transcription, DNA-templated                | 0.000        |
|         | GO:0010608 | posttranscriptional regulation of gene e... | 0.000        |
|         | GO:0009642 | response to light intensity                 | 0.000        |
|         | GO:0015994 | chlorophyll metabolic process               | 0.000        |
|         | GO:0010109 | regulation of photosynthesis                | 0.000        |
|         | GO:0016458 | gene silencing                              | 0.001        |
|         | GO:0040029 | regulation of gene expression, epigeneti... | 0.001        |
| BP      | GO:0048608 | reproductive structure development          | 0.004        |
|         | GO:0015995 | chlorophyll biosynthetic process            | 0.004        |
|         | GO:0003006 | developmental process involved in reprod... | 0.007        |
|         | GO:0042742 | defense response to bacterium               | 0.021        |
|         | GO:0050793 | regulation of developmental process         | 0.024        |
|         | GO:1901607 | alpha-amino acid biosynthetic process       | 0.047        |
|         | GO:0009908 | flower development                          | 0.049        |
|         | GO:0000302 | response to reactive oxygen species         | 0.053        |
|         | GO:0009791 | post-embryonic development                  | 0.057        |
|         | GO:0034599 | cellular response to oxidative stress       | 0.057        |
|         | GO:0048731 | system development                          | 0.100        |

**Supplementary Table 189:** GO term enrichment (filtered results) Root - Postflowering - Cluster 10 - Gene regulation, and DNA replication

## 4 All GO Terms per cluster

|     |                                       |     |
|-----|---------------------------------------|-----|
| 4.1 | Leaf Preflowering clusters . . . . .  | 99  |
| 4.2 | Leaf Postflowering clusters . . . . . | 168 |
| 4.3 | Root Preflowering clusters . . . . .  | 208 |
| 4.4 | Root Postflowering clusters . . . . . | 315 |

In what follows, we provide the list of all GO terms found enriched for all clusters.

### 4.1 Leaf Preflowering clusters

#### 4.1.1 Leaf - Preflowering - Cluster 1

| GO type    | GO ID                | Description                                 | Adj. p-value |
|------------|----------------------|---------------------------------------------|--------------|
| BP         | GO:0051252           | regulation of RNA metabolic process         | 0.000        |
|            | GO:0019748           | secondary metabolic process                 | 0.007        |
|            | GO:0006887           | exocytosis                                  | 0.009        |
|            | GO:0097659           | nucleic acid-templated transcription        | 0.009        |
|            | GO:0032774           | RNA biosynthetic process                    | 0.011        |
|            | GO:0019222           | regulation of metabolic process             | 0.011        |
|            | GO:0006351           | transcription, DNA-templated                | 0.013        |
|            | GO:0032940           | secretion by cell                           | 0.047        |
|            | GO:0016070           | RNA metabolic process                       | 0.059        |
|            | GO:0019941           | modification-dependent protein catabolic... | 0.059        |
|            | GO:0050794           | regulation of cellular process              | 0.059        |
|            | GO:0046903           | secretion                                   | 0.060        |
|            | GO:0043632           | modification-dependent macromolecule cat... | 0.073        |
|            | GO:0006511           | ubiquitin-dependent protein catabolic pr... | 0.083        |
|            | GO:0006575           | cellular modified amino acid metabolic p... | 0.098        |
| CC         | GO:0099023           | tethering complex                           | 0.001        |
|            | GO:0000145           | exocyst                                     | 0.016        |
|            | GO:0005634           | nucleus                                     | 0.034        |
|            | GO:0031226           | intrinsic component of plasma membrane      | 0.034        |
|            | GO:0005886           | plasma membrane                             | 0.050        |
| MF         | GO:0005488           | binding                                     | 0.000        |
|            | GO:0004497           | monooxygenase activity                      | 0.000        |
|            | GO:0016705           | oxidoreductase activity, acting on paire... | 0.001        |
|            | GO:0004672           | protein kinase activity                     | 0.001        |
|            | GO:0046527           | glucosyltransferase activity                | 0.004        |
|            | GO:0004364           | glutathione transferase activity            | 0.004        |
|            | GO:0032559           | adenyl ribonucleotide binding               | 0.004        |
|            | GO:0016758           | transferase activity, transferring hexos... | 0.005        |
|            | GO:0030554           | adenyl nucleotide binding                   | 0.005        |
|            | GO:0008194           | UDP-glycosyltransferase activity            | 0.005        |
|            | GO:0097367           | carbohydrate derivative binding             | 0.005        |
|            | GO:0140110           | transcription regulator activity            | 0.005        |
|            | GO:0003677           | DNA binding                                 | 0.010        |
|            | GO:0017076           | purine nucleotide binding                   | 0.010        |
|            | GO:0032553           | ribonucleotide binding                      | 0.010        |
| GO:0046906 | tetrapyrrole binding | 0.010                                       |              |
| GO:0051213 | dioxygenase activity | 0.010                                       |              |

Continued on next page

| GO type | GO ID      | Description                                 | Adj. p-value |
|---------|------------|---------------------------------------------|--------------|
|         | GO:0032555 | purine ribonucleotide binding               | 0.010        |
|         | GO:0016773 | phosphotransferase activity, alcohol gro... | 0.013        |
|         | GO:0016757 | transferase activity, transferring glyco... | 0.015        |
|         | GO:0000166 | nucleotide binding                          | 0.029        |
|         | GO:1901265 | nucleoside phosphate binding                | 0.029        |
|         | GO:0004674 | protein serine/threonine kinase activity    | 0.030        |
|         | GO:0015291 | secondary active transmembrane transport... | 0.055        |
|         | GO:0035673 | oligopeptide transmembrane transporter a... | 0.075        |
|         | GO:0016740 | transferase activity                        | 0.093        |
|         | GO:0046914 | transition metal ion binding                | 0.093        |

#### 4.1.2 Leaf - Preflowering - Cluster 2

| GO type | GO ID      | Description                                 | Adj. p-value |
|---------|------------|---------------------------------------------|--------------|
|         | GO:0015850 | organic hydroxy compound transport          | 0.000        |
|         | GO:1901071 | glucosamine-containing compound metaboli... | 0.003        |
|         | GO:0006026 | aminoglycan catabolic process               | 0.004        |
|         | GO:0006030 | chitin metabolic process                    | 0.004        |
|         | GO:0006032 | chitin catabolic process                    | 0.004        |
|         | GO:0046348 | amino sugar catabolic process               | 0.004        |
|         | GO:1901072 | glucosamine-containing compound cataboli... | 0.004        |
|         | GO:0046323 | glucose import                              | 0.004        |
|         | GO:0015749 | monosaccharide transmembrane transport      | 0.004        |
|         | GO:1904659 | glucose transmembrane transport             | 0.004        |
|         | GO:0005996 | monosaccharide metabolic process            | 0.005        |
|         | GO:0010200 | response to chitin                          | 0.005        |
|         | GO:0006022 | aminoglycan metabolic process               | 0.006        |
|         | GO:0008645 | hexose transmembrane transport              | 0.007        |
|         | GO:0015804 | neutral amino acid transport                | 0.008        |
|         | GO:0006833 | water transport                             | 0.008        |
|         | GO:0042044 | fluid transport                             | 0.008        |
|         | GO:0006836 | neurotransmitter transport                  | 0.011        |
|         | GO:0009607 | response to biotic stimulus                 | 0.012        |
|         | GO:0030104 | water homeostasis                           | 0.013        |
|         | GO:0006810 | transport                                   | 0.013        |
|         | GO:0007154 | cell communication                          | 0.013        |
|         | GO:0051234 | establishment of localization               | 0.014        |
|         | GO:0015807 | L-amino acid transport                      | 0.014        |
|         | GO:0006040 | amino sugar metabolic process               | 0.015        |
|         | GO:0006887 | exocytosis                                  | 0.016        |
|         | GO:0051179 | localization                                | 0.017        |
| BP      | GO:0003333 | amino acid transmembrane transport          | 0.019        |
|         | GO:0006487 | protein N-linked glycosylation              | 0.021        |
|         | GO:0018196 | peptidyl-asparagine modification            | 0.024        |
|         | GO:0018279 | protein N-linked glycosylation via aspar... | 0.024        |
|         | GO:0006865 | amino acid transport                        | 0.028        |
|         | GO:0007166 | cell surface receptor signaling pathway     | 0.031        |
|         | GO:0008037 | cell recognition                            | 0.031        |
|         | GO:0071495 | cellular response to endogenous stimulus    | 0.033        |
|         | GO:1902475 | L-alpha-amino acid transmembrane transpo... | 0.033        |
|         | GO:0043207 | response to external biotic stimulus        | 0.034        |
|         | GO:0051707 | response to other organism                  | 0.034        |
|         | GO:0071577 | zinc ion transmembrane transport            | 0.035        |
|         | GO:0009875 | pollen-pistil interaction                   | 0.038        |
|         | GO:0048544 | recognition of pollen                       | 0.041        |
|         | GO:0071229 | cellular response to acid chemical          | 0.045        |
|         | GO:0008361 | regulation of cell size                     | 0.049        |
|         | GO:0032870 | cellular response to hormone stimulus       | 0.049        |
|         | GO:0006575 | cellular modified amino acid metabolic p... | 0.049        |
|         | GO:0098542 | defense response to other organism          | 0.049        |

Continued on next page

| GO type | GO ID      | Description                                 | Adj. p-value |
|---------|------------|---------------------------------------------|--------------|
|         | GO:0055085 | transmembrane transport                     | 0.051        |
|         | GO:0008643 | carbohydrate transport                      | 0.054        |
|         | GO:0006855 | drug transmembrane transport                | 0.077        |
|         | GO:0046903 | secretion                                   | 0.077        |
|         | GO:0098754 | detoxification                              | 0.088        |
|         | GO:0010243 | response to organonitrogen compound         | 0.090        |
|         | GO:0009873 | ethylene-activated signaling pathway        | 0.091        |
|         | GO:0071310 | cellular response to organic substance      | 0.091        |
|         | GO:0032940 | secretion by cell                           | 0.096        |
|         | GO:0006829 | zinc ion transport                          | 0.099        |
|         | GO:0000151 | ubiquitin ligase complex                    | 0.000        |
|         | GO:0005886 | plasma membrane                             | 0.000        |
|         | GO:0012505 | endomembrane system                         | 0.000        |
|         | GO:0005798 | Golgi-associated vesicle                    | 0.002        |
|         | GO:0044459 | plasma membrane part                        | 0.002        |
|         | GO:0031226 | intrinsic component of plasma membrane      | 0.002        |
|         | GO:0005783 | endoplasmic reticulum                       | 0.004        |
|         | GO:0099023 | tethering complex                           | 0.010        |
|         | GO:0030120 | vesicle coat                                | 0.010        |
|         | GO:0030118 | clathrin coat                               | 0.012        |
|         | GO:0005773 | vacuole                                     | 0.013        |
|         | GO:0030660 | Golgi-associated vesicle membrane           | 0.016        |
|         | GO:0009506 | plasmodesma                                 | 0.016        |
| CC      | GO:0055044 | symplast                                    | 0.016        |
|         | GO:0005911 | cell-cell junction                          | 0.017        |
|         | GO:0030054 | cell junction                               | 0.017        |
|         | GO:0044433 | cytoplasmic vesicle part                    | 0.032        |
|         | GO:0005774 | vacuolar membrane                           | 0.053        |
|         | GO:0030662 | coated vesicle membrane                     | 0.053        |
|         | GO:0012506 | vesicle membrane                            | 0.057        |
|         | GO:0031410 | cytoplasmic vesicle                         | 0.061        |
|         | GO:0005794 | Golgi apparatus                             | 0.062        |
|         | GO:0009504 | cell plate                                  | 0.067        |
|         | GO:0031982 | vesicle                                     | 0.067        |
|         | GO:0097708 | intracellular vesicle                       | 0.067        |
|         | GO:0044437 | vacuolar part                               | 0.075        |
|         | GO:0030659 | cytoplasmic vesicle membrane                | 0.089        |
|         | GO:0030135 | coated vesicle                              | 0.090        |
|         | GO:0004497 | monooxygenase activity                      | 0.000        |
|         | GO:0016705 | oxidoreductase activity, acting on paire... | 0.000        |
|         | GO:1901618 | organic hydroxy compound transmembrane t... | 0.000        |
|         | GO:0015166 | polyol transmembrane transporter activit... | 0.000        |
|         | GO:0015145 | monosaccharide transmembrane transporter... | 0.002        |
|         | GO:0140096 | catalytic activity, acting on a protein     | 0.002        |
|         | GO:0005355 | glucose transmembrane transporter activi... | 0.002        |
|         | GO:0004568 | chitinase activity                          | 0.002        |
|         | GO:0097159 | organic cyclic compound binding             | 0.002        |
|         | GO:0004364 | glutathione transferase activity            | 0.002        |
|         | GO:1901363 | heterocyclic compound binding               | 0.002        |

Continued on next page

| GO type | GO ID      | Description                                 | Adj. p-value |
|---------|------------|---------------------------------------------|--------------|
|         | GO:0015149 | hexose transmembrane transporter activit... | 0.003        |
|         | GO:0005215 | transporter activity                        | 0.003        |
|         | GO:0051213 | dioxygenase activity                        | 0.003        |
|         | GO:0015179 | L-amino acid transmembrane transporter a... | 0.005        |
|         | GO:0015293 | symporter activity                          | 0.005        |
|         | GO:0005326 | neurotransmitter transporter activity       | 0.006        |
|         | GO:0015174 | basic amino acid transmembrane transport... | 0.006        |
|         | GO:0016772 | transferase activity, transferring phosp... | 0.007        |
|         | GO:0003824 | catalytic activity                          | 0.011        |
|         | GO:0015294 | solute:cation symporter activity            | 0.011        |
|         | GO:0001871 | pattern binding                             | 0.013        |
|         | GO:0030247 | polysaccharide binding                      | 0.013        |
|         | GO:0048037 | cofactor binding                            | 0.013        |
|         | GO:0015171 | amino acid transmembrane transporter act... | 0.014        |
|         | GO:0097367 | carbohydrate derivative binding             | 0.014        |
|         | GO:0032559 | adenyl ribonucleotide binding               | 0.015        |
|         | GO:0000166 | nucleotide binding                          | 0.015        |
|         | GO:1901265 | nucleoside phosphate binding                | 0.015        |
|         | GO:0015295 | solute:proton symporter activity            | 0.016        |
|         | GO:0030554 | adenyl nucleotide binding                   | 0.017        |
|         | GO:0015297 | antiporter activity                         | 0.019        |
|         | GO:0005351 | carbohydrate:proton symporter activity      | 0.020        |
|         | GO:0005402 | carbohydrate:cation symporter activity      | 0.020        |
|         | GO:0051119 | sugar transmembrane transporter activity    | 0.025        |
|         | GO:0015144 | carbohydrate transmembrane transporter a... | 0.026        |
|         | GO:0032553 | ribonucleotide binding                      | 0.026        |
|         | GO:0022804 | active transmembrane transporter activit... | 0.029        |
|         | GO:0005385 | zinc ion transmembrane transporter activ... | 0.031        |
|         | GO:0036094 | small molecule binding                      | 0.032        |
|         | GO:0022857 | transmembrane transporter activity          | 0.032        |
|         | GO:0032555 | purine ribonucleotide binding               | 0.036        |
|         | GO:0017076 | purine nucleotide binding                   | 0.046        |
|         | GO:0015175 | neutral amino acid transmembrane transpo... | 0.048        |
|         | GO:0008144 | drug binding                                | 0.066        |
|         | GO:0008483 | transaminase activity                       | 0.083        |
|         | GO:0016769 | transferase activity, transferring nitro... | 0.083        |
|         | GO:0042562 | hormone binding                             | 0.095        |

### 4.1.3 Leaf - Preflowering - Cluster 3

| GO type    | GO ID                                       | Description                                 | Adj. p-value |
|------------|---------------------------------------------|---------------------------------------------|--------------|
| BP         | GO:0005975                                  | carbohydrate metabolic process              | 0.000        |
|            | GO:1901071                                  | glucosamine-containing compound metaboli... | 0.006        |
|            | GO:0006855                                  | drug transmembrane transport                | 0.008        |
|            | GO:0042743                                  | hydrogen peroxide metabolic process         | 0.008        |
|            | GO:0006836                                  | neurotransmitter transport                  | 0.009        |
|            | GO:0015893                                  | drug transport                              | 0.015        |
|            | GO:0006022                                  | aminoglycan metabolic process               | 0.016        |
|            | GO:0018196                                  | peptidyl-asparagine modification            | 0.017        |
|            | GO:0018279                                  | protein N-linked glycosylation via aspar... | 0.017        |
|            | GO:1904659                                  | glucose transmembrane transport             | 0.017        |
|            | GO:0005996                                  | monosaccharide metabolic process            | 0.017        |
|            | GO:0015749                                  | monosaccharide transmembrane transport      | 0.019        |
|            | GO:0051187                                  | cofactor catabolic process                  | 0.024        |
|            | GO:0008645                                  | hexose transmembrane transport              | 0.025        |
|            | GO:0046323                                  | glucose import                              | 0.033        |
|            | GO:0003333                                  | amino acid transmembrane transport          | 0.035        |
|            | GO:0006040                                  | amino sugar metabolic process               | 0.035        |
|            | GO:1902475                                  | L-alpha-amino acid transmembrane transpo... | 0.035        |
|            | GO:0006633                                  | fatty acid biosynthetic process             | 0.037        |
|            | GO:0009636                                  | response to toxic substance                 | 0.037        |
|            | GO:1990748                                  | cellular detoxification                     | 0.038        |
|            | GO:0044036                                  | cell wall macromolecule metabolic proces... | 0.038        |
|            | GO:0009058                                  | biosynthetic process                        | 0.040        |
|            | GO:0033692                                  | cellular polysaccharide biosynthetic pro... | 0.042        |
|            | GO:0098869                                  | cellular oxidant detoxification             | 0.042        |
|            | GO:0016999                                  | antibiotic metabolic process                | 0.044        |
|            | GO:0006865                                  | amino acid transport                        | 0.046        |
|            | GO:0071669                                  | plant-type cell wall organization or bio... | 0.053        |
|            | GO:0043412                                  | macromolecule modification                  | 0.056        |
|            | GO:0008037                                  | cell recognition                            | 0.060        |
|            | GO:0015807                                  | L-amino acid transport                      | 0.060        |
|            | GO:0048544                                  | recognition of pollen                       | 0.060        |
|            | GO:0017144                                  | drug metabolic process                      | 0.061        |
|            | GO:0007166                                  | cell surface receptor signaling pathway     | 0.070        |
|            | GO:0009875                                  | pollen-pistil interaction                   | 0.070        |
| GO:0044281 | small molecule metabolic process            | 0.075                                       |              |
| GO:0097237 | cellular response to toxic substance        | 0.079                                       |              |
| GO:0006487 | protein N-linked glycosylation              | 0.088                                       |              |
| GO:0044267 | cellular protein metabolic process          | 0.090                                       |              |
| CC         | GO:0005886                                  | plasma membrane                             | 0.000        |
|            | GO:0044459                                  | plasma membrane part                        | 0.003        |
|            | GO:0031226                                  | intrinsic component of plasma membrane      | 0.005        |
| GO:0008194 | UDP-glycosyltransferase activity            | 0.000                                       |              |
| GO:0004497 | monooxygenase activity                      | 0.000                                       |              |
| GO:0016758 | transferase activity, transferring hexos... | 0.000                                       |              |
| GO:0016705 | oxidoreductase activity, acting on paire... | 0.000                                       |              |

Continued on next page



| GO type | GO ID      | Description                                 | Adj. p-value |
|---------|------------|---------------------------------------------|--------------|
|         | GO:0003824 | catalytic activity                          | 0.000        |
|         | GO:0030246 | carbohydrate binding                        | 0.000        |
|         | GO:0032559 | adenyl ribonucleotide binding               | 0.000        |
|         | GO:0004553 | hydrolase activity, hydrolyzing O-glycos... | 0.002        |
|         | GO:0016772 | transferase activity, transferring phosp... | 0.002        |
|         | GO:0005326 | neurotransmitter transporter activity       | 0.004        |
|         | GO:0032553 | ribonucleotide binding                      | 0.006        |
|         | GO:0032555 | purine ribonucleotide binding               | 0.006        |
|         | GO:0051213 | dioxygenase activity                        | 0.006        |
|         | GO:0015291 | secondary active transmembrane transport... | 0.006        |
|         | GO:0016684 | oxidoreductase activity, acting on perox... | 0.006        |
|         | GO:0017076 | purine nucleotide binding                   | 0.006        |
|         | GO:0004601 | peroxidase activity                         | 0.009        |
|         | GO:0016798 | hydrolase activity, acting on glycosyl b... | 0.009        |
|         | GO:0005355 | glucose transmembrane transporter activi... | 0.011        |
|         | GO:0015297 | antiporter activity                         | 0.011        |
|         | GO:0015145 | monosaccharide transmembrane transporter... | 0.012        |
|         | GO:0016209 | antioxidant activity                        | 0.016        |
|         | GO:0015149 | hexose transmembrane transporter activit... | 0.017        |
|         | GO:0015179 | L-amino acid transmembrane transporter a... | 0.018        |
|         | GO:0015238 | drug transmembrane transporter activity     | 0.018        |
|         | GO:0015171 | amino acid transmembrane transporter act... | 0.021        |
|         | GO:0050662 | coenzyme binding                            | 0.024        |
|         | GO:0097159 | organic cyclic compound binding             | 0.028        |
|         | GO:1901363 | heterocyclic compound binding               | 0.029        |
|         | GO:0043168 | anion binding                               | 0.030        |
|         | GO:0005215 | transporter activity                        | 0.030        |
|         | GO:0015174 | basic amino acid transmembrane transport... | 0.032        |
|         | GO:0015293 | symporter activity                          | 0.034        |
|         | GO:0022804 | active transmembrane transporter activit... | 0.037        |
|         | GO:0003700 | DNA binding transcription factor activit... | 0.042        |
|         | GO:0008144 | drug binding                                | 0.042        |
|         | GO:0015295 | solute:proton symporter activity            | 0.049        |
|         | GO:0016614 | oxidoreductase activity, acting on CH-OH... | 0.058        |
|         | GO:0015294 | solute:cation symporter activity            | 0.058        |
|         | GO:0001871 | pattern binding                             | 0.060        |
|         | GO:0022857 | transmembrane transporter activity          | 0.060        |
|         | GO:0030247 | polysaccharide binding                      | 0.060        |
|         | GO:0004364 | glutathione transferase activity            | 0.068        |
|         | GO:0016747 | transferase activity, transferring acyl ... | 0.080        |
|         | GO:0043167 | ion binding                                 | 0.088        |
|         | GO:0005524 | ATP binding                                 | 0.089        |
|         | GO:0000166 | nucleotide binding                          | 0.099        |
|         | GO:1901265 | nucleoside phosphate binding                | 0.099        |

#### 4.1.4 Leaf - Preflowering - Cluster 4

| GO type | GO ID      | Description                                 | Adj. p-value |
|---------|------------|---------------------------------------------|--------------|
|         | GO:0019684 | photosynthesis, light reaction              | 0.000        |
|         | GO:0051188 | cofactor biosynthetic process               | 0.000        |
|         | GO:0046394 | carboxylic acid biosynthetic process        | 0.000        |
|         | GO:1901566 | organonitrogen compound biosynthetic pro... | 0.000        |
|         | GO:0022900 | electron transport chain                    | 0.000        |
|         | GO:0033014 | tetrapyrrole biosynthetic process           | 0.000        |
|         | GO:0009108 | coenzyme biosynthetic process               | 0.000        |
|         | GO:0006631 | fatty acid metabolic process                | 0.000        |
|         | GO:0006629 | lipid metabolic process                     | 0.000        |
|         | GO:0009150 | purine ribonucleotide metabolic process     | 0.000        |
|         | GO:0006778 | porphyrin-containing compound metabolic ... | 0.000        |
|         | GO:0009165 | nucleotide biosynthetic process             | 0.000        |
|         | GO:0009161 | ribonucleoside monophosphate metabolic p... | 0.000        |
|         | GO:0009205 | purine ribonucleoside triphosphate metab... | 0.000        |
|         | GO:0071555 | cell wall organization                      | 0.000        |
|         | GO:0005975 | carbohydrate metabolic process              | 0.000        |
|         | GO:0016052 | carbohydrate catabolic process              | 0.000        |
|         | GO:0046034 | ATP metabolic process                       | 0.000        |
|         | GO:0009073 | aromatic amino acid family biosynthetic ... | 0.000        |
|         | GO:0005976 | polysaccharide metabolic process            | 0.000        |
|         | GO:0009126 | purine nucleoside monophosphate metaboli... | 0.000        |
|         | GO:0009167 | purine ribonucleoside monophosphate meta... | 0.000        |
|         | GO:0009124 | nucleoside monophosphate biosynthetic pr... | 0.000        |
|         | GO:0072522 | purine-containing compound biosynthetic ... | 0.000        |
|         | GO:0009156 | ribonucleoside monophosphate biosyntheti... | 0.000        |
|         | GO:0046434 | organophosphate catabolic process           | 0.000        |
|         | GO:0006164 | purine nucleotide biosynthetic process      | 0.000        |
|         | GO:0006733 | oxidoreduction coenzyme metabolic proces... | 0.000        |
|         | GO:0008299 | isoprenoid biosynthetic process             | 0.000        |
|         | GO:1902600 | proton transmembrane transport              | 0.000        |
|         | GO:0043604 | amide biosynthetic process                  | 0.000        |
|         | GO:0072524 | pyridine-containing compound metabolic p... | 0.000        |
|         | GO:0007017 | microtubule-based process                   | 0.000        |
|         | GO:0046496 | nicotinamide nucleotide metabolic proces... | 0.000        |
|         | GO:0046939 | nucleotide phosphorylation                  | 0.000        |
|         | GO:0072525 | pyridine-containing compound biosyntheti... | 0.000        |
|         | GO:0019362 | pyridine nucleotide metabolic process       | 0.000        |
|         | GO:0006090 | pyruvate metabolic process                  | 0.001        |
|         | GO:0043043 | peptide biosynthetic process                | 0.001        |
|         | GO:0006412 | translation                                 | 0.002        |
|         | GO:0009773 | photosynthetic electron transport in pho... | 0.002        |
|         | GO:0010109 | regulation of photosynthesis                | 0.002        |
|         | GO:0006767 | water-soluble vitamin metabolic process     | 0.002        |
|         | GO:0045333 | cellular respiration                        | 0.002        |
|         | GO:0045491 | xylan metabolic process                     | 0.002        |
|         | GO:0010206 | photosystem II repair                       | 0.002        |

Continued on next page

| GO type | GO ID      | Description                                 | Adj. p-value |
|---------|------------|---------------------------------------------|--------------|
|         | GO:0046271 | phenylpropanoid catabolic process           | 0.002        |
|         | GO:0006165 | nucleoside diphosphate phosphorylation      | 0.003        |
|         | GO:0009664 | plant-type cell wall organization           | 0.003        |
|         | GO:0042180 | cellular ketone metabolic process           | 0.003        |
|         | GO:0032544 | plastid translation                         | 0.003        |
|         | GO:0044275 | cellular carbohydrate catabolic process     | 0.003        |
|         | GO:0042168 | heme metabolic process                      | 0.003        |
|         | GO:0044249 | cellular biosynthetic process               | 0.003        |
|         | GO:0042364 | water-soluble vitamin biosynthetic proce... | 0.003        |
|         | GO:0006783 | heme biosynthetic process                   | 0.003        |
|         | GO:0010383 | cell wall polysaccharide metabolic proce... | 0.003        |
|         | GO:0042435 | indole-containing compound biosynthetic ... | 0.004        |
|         | GO:0009166 | nucleotide catabolic process                | 0.004        |
|         | GO:0016122 | xanthophyll metabolic process               | 0.004        |
|         | GO:0017004 | cytochrome complex assembly                 | 0.005        |
|         | GO:0034404 | nucleobase-containing small molecule bio... | 0.005        |
|         | GO:0044282 | small molecule catabolic process            | 0.006        |
|         | GO:0046274 | lignin catabolic process                    | 0.006        |
|         | GO:0009132 | nucleoside diphosphate metabolic process    | 0.006        |
|         | GO:0043603 | cellular amide metabolic process            | 0.006        |
|         | GO:0006096 | glycolytic process                          | 0.006        |
|         | GO:0006757 | ATP generation from ADP                     | 0.006        |
|         | GO:0009135 | purine nucleoside diphosphate metabolic ... | 0.006        |
|         | GO:0009179 | purine ribonucleoside diphosphate metabo... | 0.006        |
|         | GO:0009185 | ribonucleoside diphosphate metabolic pro... | 0.006        |
|         | GO:0009768 | photosynthesis, light harvesting in phot... | 0.006        |
|         | GO:0042866 | pyruvate biosynthetic process               | 0.006        |
|         | GO:0046031 | ADP metabolic process                       | 0.006        |
|         | GO:1901292 | nucleoside phosphate catabolic process      | 0.006        |
|         | GO:0009308 | amine metabolic process                     | 0.006        |
|         | GO:0015988 | energy coupled proton transmembrane tran... | 0.007        |
|         | GO:0015991 | ATP hydrolysis coupled proton transport     | 0.007        |
|         | GO:0030091 | protein repair                              | 0.007        |
|         | GO:0090662 | ATP hydrolysis coupled transmembrane tra... | 0.007        |
|         | GO:0099131 | ATP hydrolysis coupled ion transmembrane... | 0.007        |
|         | GO:0099132 | ATP hydrolysis coupled cation transmembr... | 0.007        |
|         | GO:0006721 | terpenoid metabolic process                 | 0.007        |
|         | GO:0044042 | glucan metabolic process                    | 0.009        |
|         | GO:0043467 | regulation of generation of precursor me... | 0.009        |
|         | GO:2000652 | regulation of secondary cell wall biogen... | 0.009        |
|         | GO:1903338 | regulation of cell wall organization or ... | 0.009        |
|         | GO:0009409 | response to cold                            | 0.009        |
|         | GO:0019252 | starch biosynthetic process                 | 0.009        |
|         | GO:0006099 | tricarboxylic acid cycle                    | 0.009        |
|         | GO:0006081 | cellular aldehyde metabolic process         | 0.010        |
|         | GO:0009060 | aerobic respiration                         | 0.010        |
|         | GO:0016114 | terpenoid biosynthetic process              | 0.011        |
|         | GO:0016999 | antibiotic metabolic process                | 0.011        |
|         | GO:0009416 | response to light stimulus                  | 0.011        |

Continued on next page

| GO type | GO ID      | Description                                 | Adj. p-value |
|---------|------------|---------------------------------------------|--------------|
|         | GO:0017001 | antibiotic catabolic process                | 0.011        |
|         | GO:0006073 | cellular glucan metabolic process           | 0.012        |
|         | GO:0006518 | peptide metabolic process                   | 0.012        |
|         | GO:0019318 | hexose metabolic process                    | 0.012        |
|         | GO:0010410 | hemicellulose metabolic process             | 0.013        |
|         | GO:0009314 | response to radiation                       | 0.013        |
|         | GO:0046364 | monosaccharide biosynthetic process         | 0.013        |
|         | GO:1901605 | alpha-amino acid metabolic process          | 0.015        |
|         | GO:0019748 | secondary metabolic process                 | 0.015        |
|         | GO:0043038 | amino acid activation                       | 0.015        |
|         | GO:0043039 | tRNA aminoacylation                         | 0.015        |
|         | GO:0046365 | monosaccharide catabolic process            | 0.015        |
|         | GO:0000272 | polysaccharide catabolic process            | 0.016        |
|         | GO:0006101 | citrate metabolic process                   | 0.016        |
|         | GO:0016311 | dephosphorylation                           | 0.017        |
|         | GO:0006760 | folic acid-containing compound metabolic... | 0.018        |
|         | GO:0044247 | cellular polysaccharide catabolic proces... | 0.018        |
|         | GO:0042558 | pteridine-containing compound metabolic ... | 0.018        |
|         | GO:0044036 | cell wall macromolecule metabolic proces... | 0.018        |
|         | GO:0005982 | starch metabolic process                    | 0.018        |
|         | GO:0015985 | energy coupled proton transport, down el... | 0.018        |
|         | GO:0015986 | ATP synthesis coupled proton transport      | 0.018        |
|         | GO:0009251 | glucan catabolic process                    | 0.018        |
|         | GO:0006743 | ubiquinone metabolic process                | 0.019        |
|         | GO:0006744 | ubiquinone biosynthetic process             | 0.019        |
|         | GO:0072593 | reactive oxygen species metabolic proces... | 0.019        |
|         | GO:1901607 | alpha-amino acid biosynthetic process       | 0.020        |
|         | GO:0045036 | protein targeting to chloroplast            | 0.020        |
|         | GO:0072596 | establishment of protein localization to... | 0.020        |
|         | GO:0010345 | suberin biosynthetic process                | 0.020        |
|         | GO:0016043 | cellular component organization             | 0.020        |
|         | GO:0046185 | aldehyde catabolic process                  | 0.020        |
|         | GO:0043648 | dicarboxylic acid metabolic process         | 0.020        |
|         | GO:0046184 | aldehyde biosynthetic process               | 0.020        |
|         | GO:0009642 | response to light intensity                 | 0.020        |
|         | GO:0010143 | cutin biosynthetic process                  | 0.023        |
|         | GO:0042744 | hydrogen peroxide catabolic process         | 0.024        |
|         | GO:0044085 | cellular component biogenesis               | 0.024        |
|         | GO:0071482 | cellular response to light stimulus         | 0.024        |
|         | GO:0032271 | regulation of protein polymerization        | 0.024        |
|         | GO:0042726 | flavin-containing compound metabolic pro... | 0.024        |
|         | GO:0009058 | biosynthetic process                        | 0.024        |
|         | GO:0018298 | protein-chromophore linkage                 | 0.024        |
|         | GO:0006771 | riboflavin metabolic process                | 0.025        |
|         | GO:0009231 | riboflavin biosynthetic process             | 0.025        |
|         | GO:0042727 | flavin-containing compound biosynthetic ... | 0.025        |
|         | GO:0072350 | tricarboxylic acid metabolic process        | 0.025        |
|         | GO:0005983 | starch catabolic process                    | 0.026        |
|         | GO:0072598 | protein localization to chloroplast         | 0.027        |

Continued on next page

| GO type | GO ID      | Description                                 | Adj. p-value |
|---------|------------|---------------------------------------------|--------------|
|         | GO:1901137 | carbohydrate derivative biosynthetic pro... | 0.028        |
|         | GO:0006568 | tryptophan metabolic process                | 0.028        |
|         | GO:0006586 | indolalkylamine metabolic process           | 0.028        |
|         | GO:1901576 | organic substance biosynthetic process      | 0.030        |
|         | GO:0042548 | regulation of photosynthesis, light reac... | 0.030        |
|         | GO:0071840 | cellular component organization or bioge... | 0.030        |
|         | GO:0006596 | polyamine biosynthetic process              | 0.031        |
|         | GO:0045492 | xylan biosynthetic process                  | 0.032        |
|         | GO:0070592 | cell wall polysaccharide biosynthetic pr... | 0.035        |
|         | GO:0015672 | monovalent inorganic cation transport       | 0.035        |
|         | GO:0009074 | aromatic amino acid family catabolic pro... | 0.035        |
|         | GO:0061024 | membrane organization                       | 0.035        |
|         | GO:0035336 | long-chain fatty-acyl-CoA metabolic proc... | 0.036        |
|         | GO:0009250 | glucan biosynthetic process                 | 0.036        |
|         | GO:0045037 | protein import into chloroplast stroma      | 0.038        |
|         | GO:0006108 | malate metabolic process                    | 0.038        |
|         | GO:0030244 | cellulose biosynthetic process              | 0.038        |
|         | GO:0071478 | cellular response to radiation              | 0.038        |
|         | GO:0006637 | acyl-CoA metabolic process                  | 0.040        |
|         | GO:0035383 | thioester metabolic process                 | 0.040        |
|         | GO:1901463 | regulation of tetrapyrrole biosynthetic ... | 0.040        |
|         | GO:0009438 | methylglyoxal metabolic process             | 0.042        |
|         | GO:0022411 | cellular component disassembly              | 0.042        |
|         | GO:0042182 | ketone catabolic process                    | 0.042        |
|         | GO:0051596 | methylglyoxal catabolic process             | 0.042        |
|         | GO:0030041 | actin filament polymerization               | 0.047        |
|         | GO:0030243 | cellulose metabolic process                 | 0.047        |
|         | GO:0030833 | regulation of actin filament polymerizat... | 0.047        |
|         | GO:0008535 | respiratory chain complex IV assembly       | 0.047        |
|         | GO:0044272 | sulfur compound biosynthetic process        | 0.047        |
|         | GO:0031425 | chloroplast RNA processing                  | 0.047        |
|         | GO:1901568 | fatty acid derivative metabolic process     | 0.050        |
|         | GO:0043624 | cellular protein complex disassembly        | 0.051        |
|         | GO:0071806 | protein transmembrane transport             | 0.052        |
|         | GO:1901401 | regulation of tetrapyrrole metabolic pro... | 0.052        |
|         | GO:0034599 | cellular response to oxidative stress       | 0.053        |
|         | GO:1901135 | carbohydrate derivative metabolic proces... | 0.054        |
|         | GO:0008154 | actin polymerization or depolymerization    | 0.059        |
|         | GO:0022607 | cellular component assembly                 | 0.059        |
|         | GO:0042743 | hydrogen peroxide metabolic process         | 0.059        |
|         | GO:0006089 | lactate metabolic process                   | 0.061        |
|         | GO:0019243 | methylglyoxal catabolic process to D-lac... | 0.061        |
|         | GO:0022904 | respiratory electron transport chain        | 0.061        |
|         | GO:0061727 | methylglyoxal catabolic process to lacta... | 0.061        |
|         | GO:0065002 | intracellular protein transmembrane tran... | 0.061        |
|         | GO:0098660 | inorganic ion transmembrane transport       | 0.061        |
|         | GO:0071214 | cellular response to abiotic stimulus       | 0.061        |
|         | GO:0104004 | cellular response to environmental stimu... | 0.061        |
|         | GO:0009628 | response to abiotic stimulus                | 0.065        |

Continued on next page

| GO type | GO ID      | Description                                 | Adj. p-value |
|---------|------------|---------------------------------------------|--------------|
|         | GO:0006418 | tRNA aminoacylation for protein translat... | 0.065        |
|         | GO:0051181 | cofactor transport                          | 0.071        |
|         | GO:0010103 | stomatal complex morphogenesis              | 0.072        |
|         | GO:0048481 | plant ovule development                     | 0.072        |
|         | GO:0010380 | regulation of chlorophyll biosynthetic p... | 0.073        |
|         | GO:0044038 | cell wall macromolecule biosynthetic pro... | 0.078        |
|         | GO:0070589 | cellular component macromolecule biosynt... | 0.078        |
|         | GO:0051187 | cofactor catabolic process                  | 0.082        |
|         | GO:0032984 | protein-containing complex disassembly      | 0.083        |
|         | GO:0019682 | glyceraldehyde-3-phosphate metabolic pro... | 0.085        |
|         | GO:0009395 | phospholipid catabolic process              | 0.089        |
|         | GO:0035670 | plant-type ovary development                | 0.089        |
|         | GO:0098754 | detoxification                              | 0.089        |
|         | GO:0008064 | regulation of actin polymerization or de... | 0.091        |
|         | GO:0030832 | regulation of actin filament length         | 0.091        |
|         | GO:0032956 | regulation of actin cytoskeleton organiz... | 0.091        |
|         | GO:0032970 | regulation of actin filament-based proce... | 0.091        |
|         | GO:0110053 | regulation of actin filament organizatio... | 0.091        |
|         | GO:0032543 | mitochondrial translation                   | 0.093        |
|         | GO:0035337 | fatty-acyl-CoA metabolic process            | 0.093        |
|         | GO:1901616 | organic hydroxy compound catabolic proce... | 0.095        |
|         | GO:0042775 | mitochondrial ATP synthesis coupled elec... | 0.096        |
|         | GO:0006399 | tRNA metabolic process                      | 0.097        |
|         | GO:0009521 | photosystem                                 | 0.000        |
|         | GO:0044429 | mitochondrial part                          | 0.000        |
|         | GO:0005739 | mitochondrion                               | 0.000        |
|         | GO:1990204 | oxidoreductase complex                      | 0.000        |
|         | GO:0005740 | mitochondrial envelope                      | 0.000        |
|         | GO:0005576 | extracellular region                        | 0.000        |
|         | GO:0005743 | mitochondrial inner membrane                | 0.000        |
|         | GO:0031969 | chloroplast membrane                        | 0.000        |
|         | GO:0098800 | inner mitochondrial membrane protein com... | 0.000        |
|         | GO:0098803 | respiratory chain complex                   | 0.000        |
|         | GO:0005746 | mitochondrial respiratory chain             | 0.000        |
|         | GO:0005875 | microtubule associated complex              | 0.000        |
|         | GO:0016469 | proton-transporting two-sector ATPase co... | 0.000        |
|         | GO:0009528 | plastid inner membrane                      | 0.000        |
|         | GO:0009295 | nucleoid                                    | 0.000        |
|         | GO:0005618 | cell wall                                   | 0.000        |
|         | GO:0005874 | microtubule                                 | 0.000        |
|         | GO:0045259 | proton-transporting ATP synthase complex    | 0.001        |
| CC      | GO:0009707 | chloroplast outer membrane                  | 0.001        |
|         | GO:0033178 | proton-transporting two-sector ATPase co... | 0.001        |
|         | GO:0009527 | plastid outer membrane                      | 0.001        |
|         | GO:0005881 | cytoplasmic microtubule                     | 0.002        |
|         | GO:0030863 | cortical cytoskeleton                       | 0.002        |
|         | GO:0030981 | cortical microtubule cytoskeleton           | 0.002        |
|         | GO:0005840 | ribosome                                    | 0.003        |
|         | GO:0009505 | plant-type cell wall                        | 0.003        |

Continued on next page

| GO type | GO ID      | Description                                 | Adj. p-value |
|---------|------------|---------------------------------------------|--------------|
|         | GO:0005623 | cell                                        | 0.005        |
|         | GO:0055028 | cortical microtubule                        | 0.008        |
|         | GO:0044464 | cell part                                   | 0.008        |
|         | GO:0042644 | chloroplast nucleoid                        | 0.011        |
|         | GO:0033180 | proton-transporting V-type ATPase, V1 do... | 0.013        |
|         | GO:0031090 | organelle membrane                          | 0.023        |
|         | GO:0009508 | plastid chromosome                          | 0.031        |
|         | GO:0019867 | outer membrane                              | 0.043        |
|         | GO:0031968 | organelle outer membrane                    | 0.047        |
|         | GO:0045261 | proton-transporting ATP synthase complex... | 0.066        |
|         | GO:0000229 | cytoplasmic chromosome                      | 0.076        |
|         | GO:0005759 | mitochondrial matrix                        | 0.090        |
|         | GO:0016787 | hydrolase activity                          | 0.000        |
|         | GO:0016491 | oxidoreductase activity                     | 0.000        |
|         | GO:0016829 | lyase activity                              | 0.000        |
|         | GO:0016788 | hydrolase activity, acting on ester bond... | 0.000        |
|         | GO:0008092 | cytoskeletal protein binding                | 0.000        |
|         | GO:0050662 | coenzyme binding                            | 0.000        |
|         | GO:0016651 | oxidoreductase activity, acting on NAD(P... | 0.000        |
|         | GO:0008236 | serine-type peptidase activity              | 0.000        |
|         | GO:0017171 | serine hydrolase activity                   | 0.000        |
|         | GO:0016655 | oxidoreductase activity, acting on NAD(P... | 0.000        |
|         | GO:0016747 | transferase activity, transferring acyl ... | 0.000        |
|         | GO:0051536 | iron-sulfur cluster binding                 | 0.000        |
|         | GO:0051540 | metal cluster binding                       | 0.000        |
|         | GO:0016791 | phosphatase activity                        | 0.000        |
|         | GO:0016684 | oxidoreductase activity, acting on perox... | 0.002        |
|         | GO:0016830 | carbon-carbon lyase activity                | 0.002        |
|         | GO:0016778 | diphosphotransferase activity               | 0.003        |
|         | GO:0016853 | isomerase activity                          | 0.003        |
|         | GO:0019205 | nucleobase-containing compound kinase ac... | 0.003        |
|         | GO:0016838 | carbon-oxygen lyase activity, acting on ... | 0.003        |
|         | GO:0051539 | 4 iron, 4 sulfur cluster binding            | 0.003        |
|         | GO:0016614 | oxidoreductase activity, acting on CH-OH... | 0.004        |
|         | GO:0004601 | peroxidase activity                         | 0.005        |
|         | GO:0005198 | structural molecule activity                | 0.006        |
|         | GO:0016462 | pyrophosphatase activity                    | 0.007        |
|         | GO:0019203 | carbohydrate phosphatase activity           | 0.007        |
|         | GO:0010333 | terpene synthase activity                   | 0.008        |
|         | GO:0017111 | nucleoside-triphosphatase activity          | 0.008        |
|         | GO:0050308 | sugar-phosphatase activity                  | 0.008        |
|         | GO:0016887 | ATPase activity                             | 0.008        |
|         | GO:0016616 | oxidoreductase activity, acting on the C... | 0.009        |
|         | GO:0052716 | hydroquinone:oxygen oxidoreductase activ... | 0.010        |
|         | GO:0016627 | oxidoreductase activity, acting on the C... | 0.010        |
|         | GO:0003993 | acid phosphatase activity                   | 0.010        |
|         | GO:0046933 | proton-transporting ATP synthase activit... | 0.011        |
|         | GO:0016866 | intramolecular transferase activity         | 0.011        |
|         | GO:0016615 | malate dehydrogenase activity               | 0.012        |

Continued on next page

| GO type | GO ID      | Description                                 | Adj. p-value |
|---------|------------|---------------------------------------------|--------------|
|         | GO:0016817 | hydrolase activity, acting on acid anhyd... | 0.013        |
|         | GO:0050660 | flavin adenine dinucleotide binding         | 0.013        |
|         | GO:0016818 | hydrolase activity, acting on acid anhyd... | 0.013        |
|         | GO:0046961 | proton-transporting ATPase activity, rot... | 0.014        |
|         | GO:0015399 | primary active transmembrane transporter... | 0.014        |
|         | GO:0015405 | P-P-bond-hydrolysis-driven transmembrane... | 0.014        |
|         | GO:0050661 | NADP binding                                | 0.014        |
|         | GO:0008374 | O-acyltransferase activity                  | 0.016        |
|         | GO:0016903 | oxidoreductase activity, acting on the a... | 0.017        |
|         | GO:0016836 | hydro-lyase activity                        | 0.018        |
|         | GO:0042626 | ATPase activity, coupled to transmembran... | 0.020        |
|         | GO:0016759 | cellulose synthase activity                 | 0.021        |
|         | GO:0016760 | cellulose synthase (UDP-forming) activit... | 0.021        |
|         | GO:0004175 | endopeptidase activity                      | 0.022        |
|         | GO:1901682 | sulfur compound transmembrane transporte... | 0.022        |
|         | GO:0016413 | O-acetyltransferase activity                | 0.022        |
|         | GO:0016861 | intramolecular oxidoreductase activity, ... | 0.022        |
|         | GO:0051087 | chaperone binding                           | 0.023        |
|         | GO:0016620 | oxidoreductase activity, acting on the a... | 0.024        |
|         | GO:0016814 | hydrolase activity, acting on carbon-nit... | 0.025        |
|         | GO:0016765 | transferase activity, transferring alkyl... | 0.025        |
|         | GO:0036442 | proton-exporting ATPase activity            | 0.025        |
|         | GO:0016741 | transferase activity, transferring one-c... | 0.026        |
|         | GO:0080019 | fatty-acyl-CoA reductase (alcohol-formin... | 0.026        |
|         | GO:0140101 | catalytic activity, acting on a tRNA        | 0.030        |
|         | GO:0051287 | NAD binding                                 | 0.033        |
|         | GO:0004812 | aminoacyl-tRNA ligase activity              | 0.033        |
|         | GO:0016875 | ligase activity, forming carbon-oxygen b... | 0.033        |
|         | GO:0019201 | nucleotide kinase activity                  | 0.035        |
|         | GO:0016831 | carboxy-lyase activity                      | 0.035        |
|         | GO:0008574 | ATP-dependent microtubule motor activity... | 0.036        |
|         | GO:1990939 | ATP-dependent microtubule motor activity    | 0.036        |
|         | GO:0019843 | rRNA binding                                | 0.037        |
|         | GO:0043492 | ATPase activity, coupled to movement of ... | 0.037        |
|         | GO:0019104 | DNA N-glycosylase activity                  | 0.040        |
|         | GO:0033764 | steroid dehydrogenase activity, acting o... | 0.041        |
|         | GO:0016717 | oxidoreductase activity, acting on paire... | 0.042        |
|         | GO:0016874 | ligase activity                             | 0.043        |
|         | GO:0070011 | peptidase activity, acting on L-amino ac... | 0.043        |
|         | GO:0016762 | xyloglucan:xyloglucosyl transferase acti... | 0.044        |
|         | GO:0004743 | pyruvate kinase activity                    | 0.045        |
|         | GO:0030955 | potassium ion binding                       | 0.045        |
|         | GO:0031420 | alkali metal ion binding                    | 0.045        |
|         | GO:0004312 | fatty acid synthase activity                | 0.050        |
|         | GO:0031409 | pigment binding                             | 0.053        |
|         | GO:0016679 | oxidoreductase activity, acting on diphe... | 0.059        |
|         | GO:0004565 | beta-galactosidase activity                 | 0.060        |
|         | GO:0003779 | actin binding                               | 0.061        |
|         | GO:0008168 | methyltransferase activity                  | 0.061        |

Continued on next page



| GO type | GO ID      | Description                                 | Adj. p-value |
|---------|------------|---------------------------------------------|--------------|
|         | GO:0016899 | oxidoreductase activity, acting on the C... | 0.063        |
|         | GO:0046556 | alpha-L-arabinofuranosidase activity        | 0.066        |
|         | GO:0015925 | galactosidase activity                      | 0.067        |
|         | GO:0016405 | CoA-ligase activity                         | 0.067        |
|         | GO:0016878 | acid-thiol ligase activity                  | 0.067        |
|         | GO:0019238 | cyclohydrolase activity                     | 0.067        |
|         | GO:0019829 | cation-transporting ATPase activity         | 0.067        |
|         | GO:0022853 | active ion transmembrane transporter act... | 0.067        |
|         | GO:0042625 | ATPase coupled ion transmembrane transpo... | 0.067        |
|         | GO:0016229 | steroid dehydrogenase activity              | 0.070        |
|         | GO:0008233 | peptidase activity                          | 0.071        |
|         | GO:0004185 | serine-type carboxypeptidase activity       | 0.073        |
|         | GO:0031072 | heat shock protein binding                  | 0.075        |
|         | GO:0016628 | oxidoreductase activity, acting on the C... | 0.076        |
|         | GO:0003854 | 3-beta-hydroxy-delta5-steroid dehydrogen... | 0.078        |
|         | GO:0070008 | serine-type exopeptidase activity           | 0.079        |
|         | GO:0008146 | sulfotransferase activity                   | 0.081        |
|         | GO:0016160 | amylase activity                            | 0.084        |
|         | GO:0071949 | FAD binding                                 | 0.084        |
|         | GO:0019206 | nucleoside kinase activity                  | 0.085        |

#### 4.1.5 Leaf - Preflowering - Cluster 5

| GO type | GO ID      | Description                                 | Adj. p-value |
|---------|------------|---------------------------------------------|--------------|
|         | GO:0006464 | cellular protein modification process       | 0.000        |
|         | GO:0036211 | protein modification process                | 0.000        |
|         | GO:0060255 | regulation of macromolecule metabolic pr... | 0.000        |
|         | GO:0051171 | regulation of nitrogen compound metaboli... | 0.000        |
|         | GO:0080090 | regulation of primary metabolic process     | 0.000        |
|         | GO:0019219 | regulation of nucleobase-containing comp... | 0.000        |
|         | GO:0051252 | regulation of RNA metabolic process         | 0.000        |
|         | GO:1903506 | regulation of nucleic acid-templated tra... | 0.000        |
|         | GO:2001141 | regulation of RNA biosynthetic process      | 0.000        |
|         | GO:0010468 | regulation of gene expression               | 0.000        |
|         | GO:0010556 | regulation of macromolecule biosynthetic... | 0.000        |
|         | GO:0070647 | protein modification by small protein co... | 0.000        |
|         | GO:0048523 | negative regulation of cellular process     | 0.000        |
|         | GO:0009892 | negative regulation of metabolic process    | 0.000        |
|         | GO:0009607 | response to biotic stimulus                 | 0.001        |
|         | GO:0071395 | cellular response to jasmonic acid stimu... | 0.001        |
|         | GO:0009867 | jasmonic acid mediated signaling pathway    | 0.002        |
|         | GO:0071495 | cellular response to endogenous stimulus    | 0.003        |
|         | GO:0006022 | aminoglycan metabolic process               | 0.004        |
|         | GO:0043161 | proteasome-mediated ubiquitin-dependent ... | 0.004        |
|         | GO:0006887 | exocytosis                                  | 0.004        |
|         | GO:0018196 | peptidyl-asparagine modification            | 0.004        |
|         | GO:0018279 | protein N-linked glycosylation via aspar... | 0.004        |
|         | GO:0019538 | protein metabolic process                   | 0.004        |
|         | GO:0031324 | negative regulation of cellular metaboli... | 0.004        |
|         | GO:0044267 | cellular protein metabolic process          | 0.004        |
|         | GO:0032870 | cellular response to hormone stimulus       | 0.005        |
|         | GO:0006026 | aminoglycan catabolic process               | 0.005        |
|         | GO:0006030 | chitin metabolic process                    | 0.005        |
|         | GO:0006032 | chitin catabolic process                    | 0.005        |
|         | GO:0016192 | vesicle-mediated transport                  | 0.005        |
|         | GO:0046348 | amino sugar catabolic process               | 0.005        |
|         | GO:1901072 | glucosamine-containing compound cataboli... | 0.005        |
|         | GO:0050832 | defense response to fungus                  | 0.006        |
|         | GO:0010629 | negative regulation of gene expression      | 0.006        |
|         | GO:0051172 | negative regulation of nitrogen compound... | 0.006        |
|         | GO:0098542 | defense response to other organism          | 0.006        |
|         | GO:0046903 | secretion                                   | 0.007        |
|         | GO:0006487 | protein N-linked glycosylation              | 0.007        |
|         | GO:1902679 | negative regulation of RNA biosynthetic ... | 0.007        |
|         | GO:1903507 | negative regulation of nucleic acid-temp... | 0.007        |
|         | GO:0010498 | proteasomal protein catabolic process       | 0.008        |
|         | GO:0019941 | modification-dependent protein catabolic... | 0.010        |
|         | GO:0006511 | ubiquitin-dependent protein catabolic pr... | 0.011        |
|         | GO:0009812 | flavonoid metabolic process                 | 0.011        |
|         | GO:0009890 | negative regulation of biosynthetic proc... | 0.011        |

Continued on next page

| GO type | GO ID      | Description                                 | Adj. p-value |
|---------|------------|---------------------------------------------|--------------|
|         | GO:0009755 | hormone-mediated signaling pathway          | 0.011        |
|         | GO:0031327 | negative regulation of cellular biosynth... | 0.012        |
|         | GO:0032940 | secretion by cell                           | 0.012        |
|         | GO:0031146 | SCF-dependent proteasomal ubiquitin-depe... | 0.012        |
|         | GO:0043632 | modification-dependent macromolecule cat... | 0.012        |
|         | GO:0042493 | response to drug                            | 0.013        |
|         | GO:0031347 | regulation of defense response              | 0.015        |
|         | GO:0010558 | negative regulation of macromolecule bio... | 0.017        |
|         | GO:1901698 | response to nitrogen compound               | 0.018        |
|         | GO:0009813 | flavonoid biosynthetic process              | 0.018        |
|         | GO:0045892 | negative regulation of transcription, DN... | 0.019        |
|         | GO:0071229 | cellular response to acid chemical          | 0.024        |
|         | GO:0023051 | regulation of signaling                     | 0.025        |
|         | GO:0006040 | amino sugar metabolic process               | 0.026        |
|         | GO:0045934 | negative regulation of nucleobase-contai... | 0.026        |
|         | GO:0009404 | toxin metabolic process                     | 0.026        |
|         | GO:0051253 | negative regulation of RNA metabolic pro... | 0.027        |
|         | GO:1901565 | organonitrogen compound catabolic proces... | 0.027        |
|         | GO:2000026 | regulation of multicellular organismal d... | 0.029        |
|         | GO:0009605 | response to external stimulus               | 0.029        |
|         | GO:0009966 | regulation of signal transduction           | 0.030        |
|         | GO:0031349 | positive regulation of defense response     | 0.032        |
|         | GO:0051716 | cellular response to stimulus               | 0.032        |
|         | GO:0050896 | response to stimulus                        | 0.033        |
|         | GO:0051239 | regulation of multicellular organismal p... | 0.035        |
|         | GO:0048507 | meristem development                        | 0.035        |
|         | GO:2000113 | negative regulation of cellular macromol... | 0.038        |
|         | GO:0009312 | oligosaccharide biosynthetic process        | 0.040        |
|         | GO:1901700 | response to oxygen-containing compound      | 0.042        |
|         | GO:0002684 | positive regulation of immune system pro... | 0.043        |
|         | GO:0023014 | signal transduction by protein phosphory... | 0.043        |
|         | GO:0050778 | positive regulation of immune response      | 0.043        |
|         | GO:0048532 | anatomical structure arrangement            | 0.048        |
|         | GO:0000209 | protein polyubiquitination                  | 0.048        |
|         | GO:0070085 | glycosylation                               | 0.048        |
|         | GO:0018193 | peptidyl-amino acid modification            | 0.053        |
|         | GO:0009617 | response to bacterium                       | 0.055        |
|         | GO:0006139 | nucleobase-containing compound metabolic... | 0.057        |
|         | GO:1902531 | regulation of intracellular signal trans... | 0.058        |
|         | GO:0044238 | primary metabolic process                   | 0.063        |
|         | GO:0010646 | regulation of cell communication            | 0.064        |
|         | GO:0050793 | regulation of developmental process         | 0.064        |
|         | GO:0080134 | regulation of response to stress            | 0.065        |
|         | GO:0048580 | regulation of post-embryonic development    | 0.069        |
|         | GO:0048583 | regulation of response to stimulus          | 0.074        |
|         | GO:0002376 | immune system process                       | 0.076        |
|         | GO:0009863 | salicylic acid mediated signaling pathwa... | 0.076        |
|         | GO:0051817 | modification of morphology or physiology... | 0.080        |
|         | GO:0045089 | positive regulation of innate immune res... | 0.080        |

Continued on next page

| GO type | GO ID      | Description                                 | Adj. p-value |
|---------|------------|---------------------------------------------|--------------|
|         | GO:0071446 | cellular response to salicylic acid stim... | 0.080        |
|         | GO:0001101 | response to acid chemical                   | 0.083        |
|         | GO:0045087 | innate immune response                      | 0.086        |
|         | GO:0042742 | defense response to bacterium               | 0.087        |
|         | GO:0010073 | meristem maintenance                        | 0.089        |
|         | GO:0009933 | meristem structural organization            | 0.092        |
|         | GO:0009856 | pollination                                 | 0.092        |
|         | GO:0044706 | multi-multicellular organism process        | 0.092        |
|         | GO:0009753 | response to jasmonic acid                   | 0.098        |
|         | GO:0006950 | response to stress                          | 0.099        |
|         | GO:0005886 | plasma membrane                             | 0.000        |
|         | GO:0005911 | cell-cell junction                          | 0.007        |
|         | GO:0030054 | cell junction                               | 0.007        |
|         | GO:0009506 | plasmodesma                                 | 0.008        |
|         | GO:0055044 | symplast                                    | 0.008        |
| CC      | GO:0099023 | tethering complex                           | 0.010        |
|         | GO:0000145 | exocyst                                     | 0.015        |
|         | GO:0044432 | endoplasmic reticulum part                  | 0.029        |
|         | GO:0030135 | coated vesicle                              | 0.034        |
|         | GO:0098827 | endoplasmic reticulum subcompartment        | 0.051        |
|         | GO:0042175 | nuclear outer membrane-endoplasmic retic... | 0.055        |
|         | GO:0005789 | endoplasmic reticulum membrane              | 0.058        |
|         | GO:0003677 | DNA binding                                 | 0.000        |
|         | GO:0008061 | chitin binding                              | 0.002        |
|         | GO:0016757 | transferase activity, transferring glyco... | 0.002        |
|         | GO:0035251 | UDP-glucosyltransferase activity            | 0.003        |
|         | GO:0005509 | calcium ion binding                         | 0.004        |
|         | GO:0008194 | UDP-glycosyltransferase activity            | 0.005        |
| MF      | GO:0004568 | chitinase activity                          | 0.005        |
|         | GO:0016758 | transferase activity, transferring hexos... | 0.005        |
|         | GO:0051213 | dioxygenase activity                        | 0.035        |
|         | GO:0008408 | 3'-5' exonuclease activity                  | 0.078        |
|         | GO:0001067 | regulatory region nucleic acid binding      | 0.085        |
|         | GO:0044212 | transcription regulatory region DNA bind... | 0.085        |
|         | GO:0005516 | calmodulin binding                          | 0.092        |

#### 4.1.6 Leaf - Preflowering - Cluster 6

| GO type | GO ID      | Description                                 | Adj. p-value |
|---------|------------|---------------------------------------------|--------------|
|         | GO:0019684 | photosynthesis, light reaction              | 0.000        |
|         | GO:0044281 | small molecule metabolic process            | 0.000        |
|         | GO:0051188 | cofactor biosynthetic process               | 0.000        |
|         | GO:0022900 | electron transport chain                    | 0.000        |
|         | GO:0006732 | coenzyme metabolic process                  | 0.000        |
|         | GO:0016053 | organic acid biosynthetic process           | 0.000        |
|         | GO:0046394 | carboxylic acid biosynthetic process        | 0.000        |
|         | GO:0017144 | drug metabolic process                      | 0.000        |
|         | GO:0009108 | coenzyme biosynthetic process               | 0.000        |
|         | GO:0033014 | tetrapyrrole biosynthetic process           | 0.000        |
|         | GO:0009165 | nucleotide biosynthetic process             | 0.000        |
|         | GO:0005975 | carbohydrate metabolic process              | 0.000        |
|         | GO:0009150 | purine ribonucleotide metabolic process     | 0.000        |
|         | GO:0006778 | porphyrin-containing compound metabolic ... | 0.000        |
|         | GO:0072522 | purine-containing compound biosynthetic ... | 0.000        |
|         | GO:0009124 | nucleoside monophosphate biosynthetic pr... | 0.000        |
|         | GO:0033013 | tetrapyrrole metabolic process              | 0.000        |
|         | GO:0009123 | nucleoside monophosphate metabolic proce... | 0.000        |
|         | GO:0044262 | cellular carbohydrate metabolic process     | 0.000        |
|         | GO:0006164 | purine nucleotide biosynthetic process      | 0.000        |
|         | GO:0044264 | cellular polysaccharide metabolic proces... | 0.000        |
|         | GO:0042546 | cell wall biogenesis                        | 0.000        |
|         | GO:0009156 | ribonucleoside monophosphate biosyntheti... | 0.000        |
|         | GO:0009161 | ribonucleoside monophosphate metabolic p... | 0.000        |
|         | GO:0009152 | purine ribonucleotide biosynthetic proce... | 0.000        |
|         | GO:0009260 | ribonucleotide biosynthetic process         | 0.000        |
|         | GO:0046390 | ribose phosphate biosynthetic process       | 0.000        |
|         | GO:0016052 | carbohydrate catabolic process              | 0.000        |
|         | GO:0016051 | carbohydrate biosynthetic process           | 0.000        |
|         | GO:0010383 | cell wall polysaccharide metabolic proce... | 0.000        |
|         | GO:0000271 | polysaccharide biosynthetic process         | 0.001        |
|         | GO:0046434 | organophosphate catabolic process           | 0.001        |
|         | GO:1902600 | proton transmembrane transport              | 0.001        |
|         | GO:0044275 | cellular carbohydrate catabolic process     | 0.001        |
|         | GO:0072524 | pyridine-containing compound metabolic p... | 0.001        |
|         | GO:0016999 | antibiotic metabolic process                | 0.002        |
|         | GO:0009628 | response to abiotic stimulus                | 0.002        |
|         | GO:0018298 | protein-chromophore linkage                 | 0.002        |
|         | GO:0044036 | cell wall macromolecule metabolic proces... | 0.002        |
|         | GO:0044042 | glucan metabolic process                    | 0.002        |
|         | GO:0006733 | oxidoreduction coenzyme metabolic proces... | 0.003        |
|         | GO:0019318 | hexose metabolic process                    | 0.003        |
|         | GO:0006073 | cellular glucan metabolic process           | 0.003        |
|         | GO:0010109 | regulation of photosynthesis                | 0.003        |
|         | GO:0034637 | cellular carbohydrate biosynthetic proce... | 0.004        |
|         | GO:0009251 | glucan catabolic process                    | 0.004        |

Continued on next page

| GO type | GO ID      | Description                                 | Adj. p-value |
|---------|------------|---------------------------------------------|--------------|
|         | GO:0044247 | cellular polysaccharide catabolic proces... | 0.004        |
|         | GO:0032787 | monocarboxylic acid metabolic process       | 0.004        |
|         | GO:0010206 | photosystem II repair                       | 0.005        |
|         | GO:0006793 | phosphorus metabolic process                | 0.005        |
|         | GO:0000272 | polysaccharide catabolic process            | 0.006        |
|         | GO:0046496 | nicotinamide nucleotide metabolic proces... | 0.006        |
|         | GO:0072525 | pyridine-containing compound biosyntheti... | 0.006        |
|         | GO:0042180 | cellular ketone metabolic process           | 0.007        |
|         | GO:0009664 | plant-type cell wall organization           | 0.007        |
|         | GO:0006090 | pyruvate metabolic process                  | 0.008        |
|         | GO:0033692 | cellular polysaccharide biosynthetic pro... | 0.009        |
|         | GO:0046939 | nucleotide phosphorylation                  | 0.009        |
|         | GO:0019362 | pyridine nucleotide metabolic process       | 0.009        |
|         | GO:0006783 | heme biosynthetic process                   | 0.011        |
|         | GO:0005983 | starch catabolic process                    | 0.011        |
|         | GO:0042168 | heme metabolic process                      | 0.013        |
|         | GO:0019359 | nicotinamide nucleotide biosynthetic pro... | 0.013        |
|         | GO:0009314 | response to radiation                       | 0.014        |
|         | GO:0043467 | regulation of generation of precursor me... | 0.015        |
|         | GO:0046365 | monosaccharide catabolic process            | 0.015        |
|         | GO:0009416 | response to light stimulus                  | 0.016        |
|         | GO:0006767 | water-soluble vitamin metabolic process     | 0.016        |
|         | GO:0015672 | monovalent inorganic cation transport       | 0.017        |
|         | GO:0006796 | phosphate-containing compound metabolic ... | 0.017        |
|         | GO:0019363 | pyridine nucleotide biosynthetic process    | 0.018        |
|         | GO:0090626 | plant epidermis morphogenesis               | 0.019        |
|         | GO:0006520 | cellular amino acid metabolic process       | 0.020        |
|         | GO:0042364 | water-soluble vitamin biosynthetic proce... | 0.021        |
|         | GO:0006165 | nucleoside diphosphate phosphorylation      | 0.024        |
|         | GO:0010118 | stomatal movement                           | 0.025        |
|         | GO:0044282 | small molecule catabolic process            | 0.027        |
|         | GO:0015980 | energy derivation by oxidation of organi... | 0.028        |
|         | GO:0042548 | regulation of photosynthesis, light reac... | 0.029        |
|         | GO:0010103 | stomatal complex morphogenesis              | 0.029        |
|         | GO:0009132 | nucleoside diphosphate metabolic process    | 0.030        |
|         | GO:0098754 | detoxification                              | 0.030        |
|         | GO:0019252 | starch biosynthetic process                 | 0.030        |
|         | GO:0006081 | cellular aldehyde metabolic process         | 0.031        |
|         | GO:0045333 | cellular respiration                        | 0.032        |
|         | GO:0046364 | monosaccharide biosynthetic process         | 0.032        |
|         | GO:0042594 | response to starvation                      | 0.034        |
|         | GO:0006108 | malate metabolic process                    | 0.037        |
|         | GO:0043648 | dicarboxylic acid metabolic process         | 0.039        |
|         | GO:1901137 | carbohydrate derivative biosynthetic pro... | 0.041        |
|         | GO:0009166 | nucleotide catabolic process                | 0.044        |
|         | GO:1901135 | carbohydrate derivative metabolic proces... | 0.047        |
|         | GO:0071496 | cellular response to external stimulus      | 0.047        |
|         | GO:0030091 | protein repair                              | 0.050        |
|         | GO:0061024 | membrane organization                       | 0.054        |

Continued on next page

| GO type | GO ID      | Description                                 | Adj. p-value |
|---------|------------|---------------------------------------------|--------------|
|         | GO:0090698 | post-embryonic plant morphogenesis          | 0.057        |
|         | GO:0010119 | regulation of stomatal movement             | 0.057        |
|         | GO:0034404 | nucleobase-containing small molecule bio... | 0.057        |
|         | GO:1901292 | nucleoside phosphate catabolic process      | 0.057        |
|         | GO:0006096 | glycolytic process                          | 0.062        |
|         | GO:0006757 | ATP generation from ADP                     | 0.062        |
|         | GO:0009135 | purine nucleoside diphosphate metabolic ... | 0.062        |
|         | GO:0009179 | purine ribonucleoside diphosphate metabo... | 0.062        |
|         | GO:0009185 | ribonucleoside diphosphate metabolic pro... | 0.062        |
|         | GO:0009645 | response to low light intensity stimulus    | 0.062        |
|         | GO:0042866 | pyruvate biosynthetic process               | 0.062        |
|         | GO:0046031 | ADP metabolic process                       | 0.062        |
|         | GO:0009308 | amine metabolic process                     | 0.066        |
|         | GO:0009060 | aerobic respiration                         | 0.070        |
|         | GO:0009991 | response to extracellular stimulus          | 0.073        |
|         | GO:0043038 | amino acid activation                       | 0.074        |
|         | GO:0043039 | tRNA aminoacylation                         | 0.074        |
|         | GO:0019682 | glyceraldehyde-3-phosphate metabolic pro... | 0.079        |
|         | GO:0042726 | flavin-containing compound metabolic pro... | 0.084        |
|         | GO:0015740 | C4-dicarboxylate transport                  | 0.086        |
|         | GO:0031668 | cellular response to extracellular stimu... | 0.088        |
|         | GO:0006099 | tricarboxylic acid cycle                    | 0.088        |
|         | GO:1901568 | fatty acid derivative metabolic process     | 0.095        |
|         | GO:0009250 | glucan biosynthetic process                 | 0.097        |
|         | GO:0031977 | thylakoid lumen                             | 0.000        |
|         | GO:0009521 | photosystem                                 | 0.000        |
|         | GO:0005576 | extracellular region                        | 0.000        |
|         | GO:1990204 | oxidoreductase complex                      | 0.000        |
|         | GO:0005740 | mitochondrial envelope                      | 0.000        |
|         | GO:0016469 | proton-transporting two-sector ATPase co... | 0.000        |
|         | GO:0070469 | respiratory chain                           | 0.000        |
|         | GO:0031969 | chloroplast membrane                        | 0.001        |
|         | GO:0042170 | plastid membrane                            | 0.002        |
|         | GO:0043227 | membrane-bounded organelle                  | 0.002        |
| CC      | GO:0043231 | intracellular membrane-bounded organelle    | 0.004        |
|         | GO:0005739 | mitochondrion                               | 0.005        |
|         | GO:0009505 | plant-type cell wall                        | 0.005        |
|         | GO:0033178 | proton-transporting two-sector ATPase co... | 0.008        |
|         | GO:0045261 | proton-transporting ATP synthase complex... | 0.025        |
|         | GO:0043226 | organelle                                   | 0.039        |
|         | GO:0043229 | intracellular organelle                     | 0.043        |
|         | GO:0005623 | cell                                        | 0.048        |
|         | GO:0044425 | membrane part                               | 0.051        |
|         | GO:0044464 | cell part                                   | 0.057        |
|         | GO:0009295 | nucleoid                                    | 0.082        |
|         | GO:0009524 | phragmoplast                                | 0.082        |
|         | GO:0016787 | hydrolase activity                          | 0.000        |
|         | GO:0016798 | hydrolase activity, acting on glycosyl b... | 0.000        |
|         | GO:0016829 | lyase activity                              | 0.000        |

Continued on next page

| GO type | GO ID      | Description                                 | Adj. p-value |
|---------|------------|---------------------------------------------|--------------|
|         | GO:0016788 | hydrolase activity, acting on ester bond... | 0.000        |
|         | GO:0016791 | phosphatase activity                        | 0.000        |
|         | GO:0016209 | antioxidant activity                        | 0.000        |
|         | GO:0016747 | transferase activity, transferring acyl ... | 0.000        |
|         | GO:0050662 | coenzyme binding                            | 0.001        |
|         | GO:0016684 | oxidoreductase activity, acting on perox... | 0.001        |
|         | GO:0016830 | carbon-carbon lyase activity                | 0.001        |
|         | GO:0004601 | peroxidase activity                         | 0.002        |
|         | GO:0044769 | ATPase activity, coupled to transmembran... | 0.004        |
|         | GO:0016616 | oxidoreductase activity, acting on the C... | 0.005        |
|         | GO:0031409 | pigment binding                             | 0.005        |
|         | GO:0015399 | primary active transmembrane transporter... | 0.008        |
|         | GO:0015405 | P-P-bond-hydrolysis-driven transmembrane... | 0.008        |
|         | GO:0046983 | protein dimerization activity               | 0.008        |
|         | GO:0022857 | transmembrane transporter activity          | 0.012        |
|         | GO:0019203 | carbohydrate phosphatase activity           | 0.013        |
|         | GO:0016615 | malate dehydrogenase activity               | 0.014        |
|         | GO:0016776 | phosphotransferase activity, phosphate g... | 0.015        |
|         | GO:0016831 | carboxy-lyase activity                      | 0.016        |
|         | GO:0050308 | sugar-phosphatase activity                  | 0.017        |
|         | GO:0042626 | ATPase activity, coupled to transmembran... | 0.018        |
|         | GO:0016853 | isomerase activity                          | 0.019        |
|         | GO:0043492 | ATPase activity, coupled to movement of ... | 0.024        |
|         | GO:0015075 | ion transmembrane transporter activity      | 0.025        |
|         | GO:0016861 | intramolecular oxidoreductase activity, ... | 0.025        |
|         | GO:0019829 | cation-transporting ATPase activity         | 0.029        |
|         | GO:0022853 | active ion transmembrane transporter act... | 0.029        |
|         | GO:0042625 | ATPase coupled ion transmembrane transpo... | 0.029        |
|         | GO:0005215 | transporter activity                        | 0.041        |
|         | GO:0022804 | active transmembrane transporter activit... | 0.042        |
|         | GO:0051287 | NAD binding                                 | 0.059        |
|         | GO:0015318 | inorganic molecular entity transmembrane... | 0.065        |
|         | GO:0015925 | galactosidase activity                      | 0.072        |
|         | GO:0016799 | hydrolase activity, hydrolyzing N-glycos... | 0.072        |
|         | GO:0015556 | C4-dicarboxylate transmembrane transport... | 0.076        |
|         | GO:0008289 | lipid binding                               | 0.081        |
|         | GO:0031072 | heat shock protein binding                  | 0.081        |
|         | GO:0019205 | nucleobase-containing compound kinase ac... | 0.082        |
|         | GO:0019842 | vitamin binding                             | 0.085        |
|         | GO:0016597 | amino acid binding                          | 0.092        |
|         | GO:0008509 | anion transmembrane transporter activity    | 0.095        |
|         | GO:0016620 | oxidoreductase activity, acting on the a... | 0.095        |



#### 4.1.7 Leaf - Preflowering - Cluster 7

| GO type | GO ID      | Description                                 | Adj. p-value |
|---------|------------|---------------------------------------------|--------------|
|         | GO:0060255 | regulation of macromolecule metabolic pr... | 0.000        |
|         | GO:0051171 | regulation of nitrogen compound metaboli... | 0.000        |
|         | GO:0016070 | RNA metabolic process                       | 0.000        |
|         | GO:0080090 | regulation of primary metabolic process     | 0.000        |
|         | GO:0019219 | regulation of nucleobase-containing comp... | 0.000        |
|         | GO:0051252 | regulation of RNA metabolic process         | 0.000        |
|         | GO:0010468 | regulation of gene expression               | 0.000        |
|         | GO:0010556 | regulation of macromolecule biosynthetic... | 0.000        |
|         | GO:2000112 | regulation of cellular macromolecule bio... | 0.000        |
|         | GO:0031326 | regulation of cellular biosynthetic proc... | 0.000        |
|         | GO:0097659 | nucleic acid-templated transcription        | 0.000        |
|         | GO:0070647 | protein modification by small protein co... | 0.000        |
|         | GO:0010498 | proteasomal protein catabolic process       | 0.000        |
|         | GO:0043161 | proteasome-mediated ubiquitin-dependent ... | 0.000        |
|         | GO:0019941 | modification-dependent protein catabolic... | 0.001        |
|         | GO:0043632 | modification-dependent macromolecule cat... | 0.001        |
|         | GO:0015850 | organic hydroxy compound transport          | 0.002        |
|         | GO:1904659 | glucose transmembrane transport             | 0.004        |
|         | GO:0006887 | exocytosis                                  | 0.005        |
|         | GO:0046323 | glucose import                              | 0.006        |
|         | GO:0008645 | hexose transmembrane transport              | 0.007        |
|         | GO:0015749 | monosaccharide transmembrane transport      | 0.008        |
|         | GO:0046903 | secretion                                   | 0.012        |
|         | GO:0046113 | nucleobase catabolic process                | 0.015        |
|         | GO:0018196 | peptidyl-asparagine modification            | 0.017        |
|         | GO:0018279 | protein N-linked glycosylation via aspar... | 0.017        |
| BP      | GO:0010629 | negative regulation of gene expression      | 0.019        |
|         | GO:0032940 | secretion by cell                           | 0.019        |
|         | GO:0006749 | glutathione metabolic process               | 0.021        |
|         | GO:0010243 | response to organonitrogen compound         | 0.021        |
|         | GO:1901565 | organonitrogen compound catabolic proces... | 0.028        |
|         | GO:0015791 | polyol transport                            | 0.028        |
|         | GO:0006487 | protein N-linked glycosylation              | 0.038        |
|         | GO:0051603 | proteolysis involved in cellular protein... | 0.043        |
|         | GO:0006829 | zinc ion transport                          | 0.047        |
|         | GO:0044257 | cellular protein catabolic process          | 0.049        |
|         | GO:0006884 | cell volume homeostasis                     | 0.054        |
|         | GO:0009992 | cellular water homeostasis                  | 0.054        |
|         | GO:0015793 | glycerol transport                          | 0.054        |
|         | GO:0019748 | secondary metabolic process                 | 0.054        |
|         | GO:0009101 | glycoprotein biosynthetic process           | 0.056        |
|         | GO:0044265 | cellular macromolecule catabolic process    | 0.058        |
|         | GO:0008361 | regulation of cell size                     | 0.060        |
|         | GO:0071826 | ribonucleoprotein complex subunit organi... | 0.068        |
|         | GO:0034620 | cellular response to unfolded protein       | 0.076        |
|         | GO:0035967 | cellular response to topologically incor... | 0.076        |

Continued on next page

| GO type | GO ID      | Description                                 | Adj. p-value |
|---------|------------|---------------------------------------------|--------------|
|         | GO:0071577 | zinc ion transmembrane transport            | 0.076        |
|         | GO:0016310 | phosphorylation                             | 0.076        |
|         | GO:0070085 | glycosylation                               | 0.088        |
|         | GO:0006505 | GPI anchor metabolic process                | 0.091        |
|         | GO:0006506 | GPI anchor biosynthetic process             | 0.091        |
|         | GO:0071705 | nitrogen compound transport                 | 0.093        |
|         | GO:0000151 | ubiquitin ligase complex                    | 0.000        |
|         | GO:0031461 | cullin-RING ubiquitin ligase complex        | 0.000        |
|         | GO:0005681 | spliceosomal complex                        | 0.000        |
|         | GO:0030117 | membrane coat                               | 0.008        |
|         | GO:0048475 | coated membrane                             | 0.008        |
|         | GO:0005635 | nuclear envelope                            | 0.009        |
|         | GO:0099023 | tethering complex                           | 0.009        |
|         | GO:0012505 | endomembrane system                         | 0.011        |
|         | GO:0005798 | Golgi-associated vesicle                    | 0.014        |
|         | GO:0005684 | U2-type spliceosomal complex                | 0.016        |
| CC      | GO:0030120 | vesicle coat                                | 0.016        |
|         | GO:0005783 | endoplasmic reticulum                       | 0.022        |
|         | GO:0071004 | U2-type prespliceosome                      | 0.036        |
|         | GO:0005911 | cell-cell junction                          | 0.038        |
|         | GO:0030054 | cell junction                               | 0.038        |
|         | GO:0009506 | plasmodesma                                 | 0.041        |
|         | GO:0055044 | symplast                                    | 0.041        |
|         | GO:0030660 | Golgi-associated vesicle membrane           | 0.081        |
|         | GO:0071013 | catalytic step 2 spliceosome                | 0.081        |
|         | GO:0030662 | coated vesicle membrane                     | 0.083        |
|         | GO:0071010 | prespliceosome                              | 0.083        |
|         | GO:0005488 | binding                                     | 0.000        |
|         | GO:0004497 | monooxygenase activity                      | 0.000        |
|         | GO:0003676 | nucleic acid binding                        | 0.000        |
|         | GO:0004672 | protein kinase activity                     | 0.000        |
|         | GO:0016705 | oxidoreductase activity, acting on paire... | 0.000        |
|         | GO:0032559 | adenyl ribonucleotide binding               | 0.003        |
|         | GO:0030554 | adenyl nucleotide binding                   | 0.004        |
|         | GO:0097367 | carbohydrate derivative binding             | 0.004        |
|         | GO:0016773 | phosphotransferase activity, alcohol gro... | 0.005        |
|         | GO:0032553 | ribonucleotide binding                      | 0.005        |
|         | GO:0008061 | chitin binding                              | 0.007        |
|         | GO:0032555 | purine ribonucleotide binding               | 0.007        |
|         | GO:0017076 | purine nucleotide binding                   | 0.007        |
|         | GO:0004674 | protein serine/threonine kinase activity    | 0.008        |
|         | GO:0005355 | glucose transmembrane transporter activi... | 0.008        |
|         | GO:0000166 | nucleotide binding                          | 0.009        |
|         | GO:0008194 | UDP-glycosyltransferase activity            | 0.009        |
|         | GO:1901265 | nucleoside phosphate binding                | 0.009        |
|         | GO:1901618 | organic hydroxy compound transmembrane t... | 0.009        |
|         | GO:0015149 | hexose transmembrane transporter activit... | 0.016        |
|         | GO:0140096 | catalytic activity, acting on a protein     | 0.017        |
|         | GO:0046527 | glucosyltransferase activity                | 0.018        |
| MF      |            |                                             |              |

Continued on next page

| GO type | GO ID      | Description                                 | Adj. p-value |
|---------|------------|---------------------------------------------|--------------|
|         | GO:0015145 | monosaccharide transmembrane transporter... | 0.018        |
|         | GO:0015166 | polyol transmembrane transporter activit... | 0.018        |
|         | GO:0016758 | transferase activity, transferring hexos... | 0.024        |
|         | GO:0051213 | dioxygenase activity                        | 0.028        |
|         | GO:0036094 | small molecule binding                      | 0.030        |
|         | GO:0004364 | glutathione transferase activity            | 0.031        |
|         | GO:0015168 | glycerol transmembrane transporter activ... | 0.031        |
|         | GO:0046906 | tetrapyrrole binding                        | 0.043        |
|         | GO:0005372 | water transmembrane transporter activity    | 0.056        |
|         | GO:0015250 | water channel activity                      | 0.056        |
|         | GO:0015254 | glycerol channel activity                   | 0.056        |
|         | GO:0030246 | carbohydrate binding                        | 0.056        |
|         | GO:0043168 | anion binding                               | 0.057        |
|         | GO:0015293 | symporter activity                          | 0.058        |
|         | GO:0001067 | regulatory region nucleic acid binding      | 0.064        |
|         | GO:0044212 | transcription regulatory region DNA bind... | 0.064        |
|         | GO:0008536 | Ran GTPase binding                          | 0.068        |
|         | GO:0005385 | zinc ion transmembrane transporter activ... | 0.076        |
|         | GO:0015294 | solute:cation symporter activity            | 0.079        |
|         | GO:0046914 | transition metal ion binding                | 0.086        |
|         | GO:0016757 | transferase activity, transferring glyco... | 0.086        |
|         | GO:0031624 | ubiquitin conjugating enzyme binding        | 0.086        |
|         | GO:0044390 | ubiquitin-like protein conjugating enzym... | 0.086        |

#### 4.1.8 Leaf - Preflowering - Cluster 8

| GO type | GO ID      | Description                                         | Adj. p-value |
|---------|------------|-----------------------------------------------------|--------------|
|         | GO:0019684 | photosynthesis, light reaction                      | 0.000        |
|         | GO:0051188 | cofactor biosynthetic process                       | 0.000        |
|         | GO:0044283 | small molecule biosynthetic process                 | 0.000        |
|         | GO:0019637 | organophosphate metabolic process                   | 0.000        |
|         | GO:0051186 | cofactor metabolic process                          | 0.000        |
|         | GO:0016053 | organic acid biosynthetic process                   | 0.000        |
|         | GO:0046394 | carboxylic acid biosynthetic process                | 0.000        |
|         | GO:0006753 | nucleoside phosphate metabolic process              | 0.000        |
|         | GO:0006732 | coenzyme metabolic process                          | 0.000        |
|         | GO:0005975 | carbohydrate metabolic process                      | 0.000        |
|         | GO:0009150 | purine ribonucleotide metabolic process             | 0.000        |
|         | GO:0071554 | cell wall organization or biogenesis                | 0.000        |
|         | GO:0009123 | nucleoside monophosphate metabolic process          | 0.000        |
|         | GO:0022900 | electron transport chain                            | 0.000        |
|         | GO:0009699 | phenylpropanoid biosynthetic process                | 0.000        |
|         | GO:0006629 | lipid metabolic process                             | 0.000        |
|         | GO:0008610 | lipid biosynthetic process                          | 0.000        |
|         | GO:0046434 | organophosphate catabolic process                   | 0.000        |
|         | GO:0033014 | tetrapyrrole biosynthetic process                   | 0.000        |
|         | GO:0046034 | ATP metabolic process                               | 0.000        |
|         | GO:0017144 | drug metabolic process                              | 0.000        |
|         | GO:0044262 | cellular carbohydrate metabolic process             | 0.000        |
|         | GO:1901293 | nucleoside phosphate biosynthetic process           | 0.000        |
|         | GO:0009165 | nucleotide biosynthetic process                     | 0.000        |
|         | GO:0071555 | cell wall organization                              | 0.000        |
|         | GO:0042546 | cell wall biogenesis                                | 0.000        |
|         | GO:0006090 | pyruvate metabolic process                          | 0.000        |
|         | GO:0090407 | organophosphate biosynthetic process                | 0.000        |
|         | GO:0009145 | purine nucleoside triphosphate biosynthesis         | 0.000        |
|         | GO:0009206 | purine ribonucleoside triphosphate biosynthesis     | 0.000        |
|         | GO:0006164 | purine nucleotide biosynthetic process              | 0.000        |
|         | GO:0019359 | nicotinamide nucleotide biosynthetic process        | 0.000        |
|         | GO:0009201 | ribonucleoside triphosphate biosynthesis            | 0.000        |
|         | GO:0046939 | nucleotide phosphorylation                          | 0.000        |
|         | GO:0009152 | purine ribonucleotide biosynthetic process          | 0.000        |
|         | GO:0009073 | aromatic amino acid family biosynthetic process     | 0.000        |
|         | GO:0008299 | isoprenoid biosynthetic process                     | 0.000        |
|         | GO:0010383 | cell wall polysaccharide metabolic process          | 0.000        |
|         | GO:0000272 | polysaccharide catabolic process                    | 0.000        |
|         | GO:0015980 | energy derivation by oxidation of organic compounds | 0.001        |
|         | GO:0098869 | cellular oxidant detoxification                     | 0.001        |
|         | GO:0044275 | cellular carbohydrate catabolic process             | 0.001        |
|         | GO:0006766 | vitamin metabolic process                           | 0.001        |
|         | GO:0034404 | nucleobase-containing small molecule biosynthesis   | 0.001        |
|         | GO:0016051 | carbohydrate biosynthetic process                   | 0.002        |
|         | GO:0016109 | tetraterpenoid biosynthetic process                 | 0.002        |

Continued on next page

| GO type | GO ID      | Description                                 | Adj. p-value |
|---------|------------|---------------------------------------------|--------------|
|         | GO:0016117 | carotenoid biosynthetic process             | 0.002        |
|         | GO:0006783 | heme biosynthetic process                   | 0.002        |
|         | GO:0010410 | hemicellulose metabolic process             | 0.003        |
|         | GO:0009808 | lignin metabolic process                    | 0.003        |
|         | GO:0045333 | cellular respiration                        | 0.003        |
|         | GO:0006793 | phosphorus metabolic process                | 0.003        |
|         | GO:0009110 | vitamin biosynthetic process                | 0.003        |
|         | GO:0009664 | plant-type cell wall organization           | 0.004        |
|         | GO:0046365 | monosaccharide catabolic process            | 0.004        |
|         | GO:0016311 | dephosphorylation                           | 0.005        |
|         | GO:0010207 | photosystem II assembly                     | 0.005        |
|         | GO:0045491 | xylan metabolic process                     | 0.005        |
|         | GO:1901135 | carbohydrate derivative metabolic proces... | 0.005        |
|         | GO:0048235 | pollen sperm cell differentiation           | 0.006        |
|         | GO:0009060 | aerobic respiration                         | 0.006        |
|         | GO:0016122 | xanthophyll metabolic process               | 0.007        |
|         | GO:0034637 | cellular carbohydrate biosynthetic proce... | 0.008        |
|         | GO:0006520 | cellular amino acid metabolic process       | 0.008        |
|         | GO:0030244 | cellulose biosynthetic process              | 0.008        |
|         | GO:0044247 | cellular polysaccharide catabolic proces... | 0.008        |
|         | GO:0046185 | aldehyde catabolic process                  | 0.008        |
|         | GO:0009409 | response to cold                            | 0.008        |
|         | GO:0042214 | terpene metabolic process                   | 0.009        |
|         | GO:0008652 | cellular amino acid biosynthetic process    | 0.009        |
|         | GO:0006006 | glucose metabolic process                   | 0.010        |
|         | GO:0030243 | cellulose metabolic process                 | 0.010        |
|         | GO:0030091 | protein repair                              | 0.010        |
|         | GO:2000652 | regulation of secondary cell wall biogen... | 0.011        |
|         | GO:0044036 | cell wall macromolecule metabolic proces... | 0.012        |
|         | GO:0032271 | regulation of protein polymerization        | 0.012        |
|         | GO:0010114 | response to red light                       | 0.012        |
|         | GO:0006796 | phosphate-containing compound metabolic ... | 0.012        |
|         | GO:0009314 | response to radiation                       | 0.012        |
|         | GO:0010103 | stomatal complex morphogenesis              | 0.012        |
|         | GO:0006081 | cellular aldehyde metabolic process         | 0.013        |
|         | GO:0009416 | response to light stimulus                  | 0.016        |
|         | GO:0010143 | cutin biosynthetic process                  | 0.017        |
|         | GO:0017004 | cytochrome complex assembly                 | 0.017        |
|         | GO:0009773 | photosynthetic electron transport in pho... | 0.017        |
|         | GO:0035336 | long-chain fatty-acyl-CoA metabolic proc... | 0.019        |
|         | GO:0009251 | glucan catabolic process                    | 0.019        |
|         | GO:0000162 | tryptophan biosynthetic process             | 0.021        |
|         | GO:0010206 | photosystem II repair                       | 0.021        |
|         | GO:0046219 | indolalkylamine biosynthetic process        | 0.021        |
|         | GO:0071214 | cellular response to abiotic stimulus       | 0.021        |
|         | GO:0104004 | cellular response to environmental stimu... | 0.021        |
|         | GO:0005983 | starch catabolic process                    | 0.021        |
|         | GO:0009250 | glucan biosynthetic process                 | 0.024        |
|         | GO:0009395 | phospholipid catabolic process              | 0.024        |

Continued on next page

| GO type | GO ID      | Description                                 | Adj. p-value |
|---------|------------|---------------------------------------------|--------------|
|         | GO:0042168 | heme metabolic process                      | 0.024        |
|         | GO:1901401 | regulation of tetrapyrrole metabolic pro... | 0.024        |
|         | GO:0007010 | cytoskeleton organization                   | 0.025        |
|         | GO:0098660 | inorganic ion transmembrane transport       | 0.025        |
|         | GO:0006576 | cellular biogenic amine metabolic proces... | 0.027        |
|         | GO:0009309 | amine biosynthetic process                  | 0.027        |
|         | GO:0042401 | cellular biogenic amine biosynthetic pro... | 0.027        |
|         | GO:0032544 | plastid translation                         | 0.029        |
|         | GO:0009438 | methylglyoxal metabolic process             | 0.033        |
|         | GO:0042182 | ketone catabolic process                    | 0.033        |
|         | GO:0046854 | phosphatidylinositol phosphorylation        | 0.033        |
|         | GO:0051596 | methylglyoxal catabolic process             | 0.033        |
|         | GO:0009628 | response to abiotic stimulus                | 0.034        |
|         | GO:0030041 | actin filament polymerization               | 0.034        |
|         | GO:0030833 | regulation of actin filament polymerizat... | 0.034        |
|         | GO:0043038 | amino acid activation                       | 0.034        |
|         | GO:0043039 | tRNA aminoacylation                         | 0.034        |
|         | GO:0019430 | removal of superoxide radicals              | 0.034        |
|         | GO:0071450 | cellular response to oxygen radical         | 0.034        |
|         | GO:0071451 | cellular response to superoxide             | 0.034        |
|         | GO:0010109 | regulation of photosynthesis                | 0.034        |
|         | GO:0044550 | secondary metabolite biosynthetic proces... | 0.036        |
|         | GO:0071478 | cellular response to radiation              | 0.036        |
|         | GO:0035337 | fatty-acyl-CoA metabolic process            | 0.037        |
|         | GO:0046184 | aldehyde biosynthetic process               | 0.037        |
|         | GO:0048438 | floral whorl development                    | 0.038        |
|         | GO:1901137 | carbohydrate derivative biosynthetic pro... | 0.038        |
|         | GO:1901615 | organic hydroxy compound metabolic proce... | 0.042        |
|         | GO:0048481 | plant ovule development                     | 0.043        |
|         | GO:0006108 | malate metabolic process                    | 0.045        |
|         | GO:0019674 | NAD metabolic process                       | 0.047        |
|         | GO:0016114 | terpenoid biosynthetic process              | 0.048        |
|         | GO:0071482 | cellular response to light stimulus         | 0.049        |
|         | GO:0009741 | response to brassinosteroid                 | 0.050        |
|         | GO:0006721 | terpenoid metabolic process                 | 0.053        |
|         | GO:1901617 | organic hydroxy compound biosynthetic pr... | 0.053        |
|         | GO:0006284 | base-excision repair                        | 0.053        |
|         | GO:0015985 | energy coupled proton transport, down el... | 0.053        |
|         | GO:0015986 | ATP synthesis coupled proton transport      | 0.053        |
|         | GO:0006644 | phospholipid metabolic process              | 0.054        |
|         | GO:0006089 | lactate metabolic process                   | 0.056        |
|         | GO:0009074 | aromatic amino acid family catabolic pro... | 0.056        |
|         | GO:0019243 | methylglyoxal catabolic process to D-lac... | 0.056        |
|         | GO:0061727 | methylglyoxal catabolic process to lacta... | 0.056        |
|         | GO:0006558 | L-phenylalanine metabolic process           | 0.056        |
|         | GO:1902221 | erythrose 4-phosphate/phosphoenolpyruvat... | 0.056        |
|         | GO:0006743 | ubiquinone metabolic process                | 0.056        |
|         | GO:0006744 | ubiquinone biosynthetic process             | 0.056        |
|         | GO:0009642 | response to light intensity                 | 0.056        |

Continued on next page

| GO type | GO ID      | Description                                 | Adj. p-value |
|---------|------------|---------------------------------------------|--------------|
|         | GO:1901568 | fatty acid derivative metabolic process     | 0.056        |
|         | GO:0035670 | plant-type ovary development                | 0.057        |
|         | GO:0010345 | suberin biosynthetic process                | 0.058        |
|         | GO:0008064 | regulation of actin polymerization or de... | 0.060        |
|         | GO:0030832 | regulation of actin filament length         | 0.060        |
|         | GO:0032956 | regulation of actin cytoskeleton organiz... | 0.060        |
|         | GO:0032970 | regulation of actin filament-based proce... | 0.060        |
|         | GO:0110053 | regulation of actin filament organizatio... | 0.060        |
|         | GO:0098662 | inorganic cation transmembrane transport    | 0.061        |
|         | GO:0045492 | xylan biosynthetic process                  | 0.061        |
|         | GO:0015672 | monovalent inorganic cation transport       | 0.062        |
|         | GO:0051261 | protein depolymerization                    | 0.063        |
|         | GO:0090626 | plant epidermis morphogenesis               | 0.063        |
|         | GO:0006637 | acyl-CoA metabolic process                  | 0.063        |
|         | GO:0018298 | protein-chromophore linkage                 | 0.063        |
|         | GO:0035383 | thioester metabolic process                 | 0.063        |
|         | GO:0044106 | cellular amine metabolic process            | 0.064        |
|         | GO:0044249 | cellular biosynthetic process               | 0.064        |
|         | GO:0046834 | lipid phosphorylation                       | 0.064        |
|         | GO:1902903 | regulation of supramolecular fiber organ... | 0.064        |
|         | GO:0008272 | sulfate transport                           | 0.068        |
|         | GO:0006418 | tRNA aminoacylation for protein translat... | 0.068        |
|         | GO:1901607 | alpha-amino acid biosynthetic process       | 0.068        |
|         | GO:0051274 | beta-glucan biosynthetic process            | 0.070        |
|         | GO:0098586 | cellular response to virus                  | 0.070        |
|         | GO:1903338 | regulation of cell wall organization or ... | 0.071        |
|         | GO:0034614 | cellular response to reactive oxygen spe... | 0.071        |
|         | GO:0008152 | metabolic process                           | 0.072        |
|         | GO:0051273 | beta-glucan metabolic process               | 0.074        |
|         | GO:0010052 | guard cell differentiation                  | 0.074        |
|         | GO:1901566 | organonitrogen compound biosynthetic pro... | 0.076        |
|         | GO:0043244 | regulation of protein complex disassembl... | 0.077        |
|         | GO:0070592 | cell wall polysaccharide biosynthetic pr... | 0.079        |
|         | GO:0022904 | respiratory electron transport chain        | 0.083        |
|         | GO:0043467 | regulation of generation of precursor me... | 0.086        |
|         | GO:0044038 | cell wall macromolecule biosynthetic pro... | 0.086        |
|         | GO:0070589 | cellular component macromolecule biosynt... | 0.086        |
|         | GO:0032259 | methylation                                 | 0.089        |
|         | GO:0042335 | cuticle development                         | 0.091        |
|         | GO:0006119 | oxidative phosphorylation                   | 0.092        |
|         | GO:0042773 | ATP synthesis coupled electron transport    | 0.092        |
|         | GO:0009308 | amine metabolic process                     | 0.096        |
|         | GO:0031977 | thylakoid lumen                             | 0.000        |
|         | GO:0005576 | extracellular region                        | 0.000        |
|         | GO:0016469 | proton-transporting two-sector ATPase co... | 0.000        |
|         | GO:0031969 | chloroplast membrane                        | 0.000        |
|         | GO:0005856 | cytoskeleton                                | 0.000        |
|         | GO:0044430 | cytoskeletal part                           | 0.000        |
|         | GO:1990204 | oxidoreductase complex                      | 0.000        |

Continued on next page

| GO type | GO ID      | Description                                 | Adj. p-value |
|---------|------------|---------------------------------------------|--------------|
|         | GO:0005875 | microtubule associated complex              | 0.000        |
|         | GO:0005743 | mitochondrial inner membrane                | 0.000        |
|         | GO:0033176 | proton-transporting V-type ATPase comple... | 0.000        |
|         | GO:0009295 | nucleoid                                    | 0.001        |
|         | GO:0009528 | plastid inner membrane                      | 0.001        |
|         | GO:0042646 | plastid nucleoid                            | 0.001        |
|         | GO:0046658 | anchored component of plasma membrane       | 0.001        |
|         | GO:0070469 | respiratory chain                           | 0.001        |
|         | GO:0044455 | mitochondrial membrane part                 | 0.001        |
|         | GO:0016020 | membrane                                    | 0.001        |
|         | GO:0010319 | stromule                                    | 0.002        |
|         | GO:0005618 | cell wall                                   | 0.002        |
|         | GO:0030312 | external encapsulating structure            | 0.002        |
|         | GO:0005881 | cytoplasmic microtubule                     | 0.002        |
|         | GO:0030863 | cortical cytoskeleton                       | 0.002        |
|         | GO:0030981 | cortical microtubule cytoskeleton           | 0.002        |
|         | GO:0009706 | chloroplast inner membrane                  | 0.003        |
|         | GO:0005753 | mitochondrial proton-transporting ATP sy... | 0.004        |
|         | GO:0098796 | membrane protein complex                    | 0.004        |
|         | GO:0042644 | chloroplast nucleoid                        | 0.004        |
|         | GO:0098803 | respiratory chain complex                   | 0.005        |
|         | GO:0009654 | photosystem II oxygen evolving complex      | 0.006        |
|         | GO:0005746 | mitochondrial respiratory chain             | 0.008        |
|         | GO:0009505 | plant-type cell wall                        | 0.008        |
|         | GO:0055028 | cortical microtubule                        | 0.009        |
|         | GO:0045259 | proton-transporting ATP synthase complex    | 0.010        |
|         | GO:0098798 | mitochondrial protein complex               | 0.010        |
|         | GO:0030964 | NADH dehydrogenase complex                  | 0.010        |
|         | GO:0045271 | respiratory chain complex I                 | 0.010        |
|         | GO:0005747 | mitochondrial respiratory chain complex ... | 0.018        |
|         | GO:0009524 | phragmoplast                                | 0.039        |
|         | GO:0000229 | cytoplasmic chromosome                      | 0.052        |
|         | GO:0009508 | plastid chromosome                          | 0.085        |
|         | GO:0016787 | hydrolase activity                          | 0.000        |
|         | GO:0016829 | lyase activity                              | 0.000        |
|         | GO:0016788 | hydrolase activity, acting on ester bond... | 0.000        |
|         | GO:0016491 | oxidoreductase activity                     | 0.000        |
|         | GO:0042578 | phosphoric ester hydrolase activity         | 0.000        |
|         | GO:0016791 | phosphatase activity                        | 0.000        |
|         | GO:0016655 | oxidoreductase activity, acting on NAD(P... | 0.000        |
|         | GO:0003954 | NADH dehydrogenase activity                 | 0.000        |
|         | GO:0008168 | methyltransferase activity                  | 0.002        |
|         | GO:0050662 | coenzyme binding                            | 0.002        |
|         | GO:0016747 | transferase activity, transferring acyl ... | 0.002        |
|         | GO:0016168 | chlorophyll binding                         | 0.003        |
|         | GO:0016746 | transferase activity, transferring acyl ... | 0.003        |
|         | GO:0008236 | serine-type peptidase activity              | 0.003        |
|         | GO:0016413 | O-acetyltransferase activity                | 0.003        |
|         | GO:0016614 | oxidoreductase activity, acting on CH-OH... | 0.003        |

Continued on next page



| GO type | GO ID      | Description                                 | Adj. p-value |
|---------|------------|---------------------------------------------|--------------|
|         | GO:0017171 | serine hydrolase activity                   | 0.003        |
|         | GO:0016762 | xyloglucan:xyloglucosyl transferase acti... | 0.003        |
|         | GO:0004252 | serine-type endopeptidase activity          | 0.004        |
|         | GO:0008374 | O-acyltransferase activity                  | 0.004        |
|         | GO:0016759 | cellulose synthase activity                 | 0.004        |
|         | GO:0016760 | cellulose synthase (UDP-forming) activit... | 0.004        |
|         | GO:0016830 | carbon-carbon lyase activity                | 0.004        |
|         | GO:0008137 | NADH dehydrogenase (ubiquinone) activity    | 0.004        |
|         | GO:0016838 | carbon-oxygen lyase activity, acting on ... | 0.004        |
|         | GO:0048037 | cofactor binding                            | 0.004        |
|         | GO:0050136 | NADH dehydrogenase (quinone) activity       | 0.004        |
|         | GO:0016836 | hydro-lyase activity                        | 0.004        |
|         | GO:0016620 | oxidoreductase activity, acting on the a... | 0.005        |
|         | GO:0016778 | diphosphotransferase activity               | 0.007        |
|         | GO:0140097 | catalytic activity, acting on DNA           | 0.008        |
|         | GO:0008574 | ATP-dependent microtubule motor activity... | 0.008        |
|         | GO:0046961 | proton-transporting ATPase activity, rot... | 0.008        |
|         | GO:1990939 | ATP-dependent microtubule motor activity    | 0.008        |
|         | GO:0016790 | thiolester hydrolase activity               | 0.009        |
|         | GO:0016866 | intramolecular transferase activity         | 0.010        |
|         | GO:0016903 | oxidoreductase activity, acting on the a... | 0.010        |
|         | GO:2001070 | starch binding                              | 0.010        |
|         | GO:0016776 | phosphotransferase activity, phosphate g... | 0.012        |
|         | GO:0019203 | carbohydrate phosphatase activity           | 0.013        |
|         | GO:0010333 | terpene synthase activity                   | 0.013        |
|         | GO:0016853 | isomerase activity                          | 0.015        |
|         | GO:0016840 | carbon-nitrogen lyase activity              | 0.015        |
|         | GO:0016407 | acetyltransferase activity                  | 0.015        |
|         | GO:0016462 | pyrophosphatase activity                    | 0.016        |
|         | GO:0080019 | fatty-acyl-CoA reductase (alcohol-formin... | 0.016        |
|         | GO:0036442 | proton-exporting ATPase activity            | 0.018        |
|         | GO:0016887 | ATPase activity                             | 0.019        |
|         | GO:0016616 | oxidoreductase activity, acting on the C... | 0.019        |
|         | GO:0019205 | nucleobase-containing compound kinase ac... | 0.019        |
|         | GO:0008757 | S-adenosylmethionine-dependent methyltra... | 0.020        |
|         | GO:0140101 | catalytic activity, acting on a tRNA        | 0.023        |
|         | GO:0016818 | hydrolase activity, acting on acid anhyd... | 0.024        |
|         | GO:0017111 | nucleoside-triphosphatase activity          | 0.025        |
|         | GO:0033764 | steroid dehydrogenase activity, acting o... | 0.031        |
|         | GO:0031409 | pigment binding                             | 0.034        |
|         | GO:0046933 | proton-transporting ATP synthase activit... | 0.034        |
|         | GO:0016817 | hydrolase activity, acting on acid anhyd... | 0.034        |
|         | GO:0051287 | NAD binding                                 | 0.039        |
|         | GO:0016799 | hydrolase activity, hydrolyzing N-glycos... | 0.041        |
|         | GO:0019104 | DNA N-glycosylase activity                  | 0.042        |
|         | GO:0051015 | actin filament binding                      | 0.049        |
|         | GO:0016684 | oxidoreductase activity, acting on perox... | 0.049        |
|         | GO:0016615 | malate dehydrogenase activity               | 0.050        |
|         | GO:0003779 | actin binding                               | 0.054        |

Continued on next page

| GO type | GO ID      | Description                                 | Adj. p-value |
|---------|------------|---------------------------------------------|--------------|
|         | GO:0016740 | transferase activity                        | 0.054        |
|         | GO:0003854 | 3-beta-hydroxy-delta5-steroid dehydrogen... | 0.059        |
|         | GO:0016229 | steroid dehydrogenase activity              | 0.061        |
|         | GO:0050308 | sugar-phosphatase activity                  | 0.061        |
|         | GO:0004812 | aminoacyl-tRNA ligase activity              | 0.064        |
|         | GO:0016875 | ligase activity, forming carbon-oxygen b... | 0.064        |
|         | GO:0004601 | peroxidase activity                         | 0.084        |
|         | GO:0016868 | intramolecular transferase activity, pho... | 0.085        |
|         | GO:0004185 | serine-type carboxypeptidase activity       | 0.088        |
|         | GO:0070008 | serine-type exopeptidase activity           | 0.093        |
|         | GO:0016874 | ligase activity                             | 0.095        |
|         | GO:0042349 | guiding stereospecific synthesis activit... | 0.095        |
|         | GO:0016774 | phosphotransferase activity, carboxyl gr... | 0.099        |
|         | GO:0050661 | NADP binding                                | 0.100        |

#### 4.1.9 Leaf - Preflowering - Cluster 9

| GO type    | GO ID                              | Description                                 | Adj. p-value |
|------------|------------------------------------|---------------------------------------------|--------------|
| BP         | GO:0060255                         | regulation of macromolecule metabolic pr... | 0.000        |
|            | GO:0031323                         | regulation of cellular metabolic process    | 0.000        |
|            | GO:0009892                         | negative regulation of metabolic process    | 0.000        |
|            | GO:0018205                         | peptidyl-lysine modification                | 0.000        |
|            | GO:0022613                         | ribonucleoprotein complex biogenesis        | 0.000        |
|            | GO:0009451                         | RNA modification                            | 0.000        |
|            | GO:0042493                         | response to drug                            | 0.003        |
|            | GO:0032259                         | methylation                                 | 0.003        |
|            | GO:1901698                         | response to nitrogen compound               | 0.004        |
|            | GO:0010200                         | response to chitin                          | 0.005        |
|            | GO:0018022                         | peptidyl-lysine methylation                 | 0.005        |
|            | GO:0042254                         | ribosome biogenesis                         | 0.005        |
|            | GO:0010243                         | response to organonitrogen compound         | 0.006        |
|            | GO:0048519                         | negative regulation of biological proces... | 0.008        |
|            | GO:0031497                         | chromatin assembly                          | 0.008        |
|            | GO:0006333                         | chromatin assembly or disassembly           | 0.008        |
|            | GO:0042542                         | response to hydrogen peroxide               | 0.009        |
|            | GO:0018193                         | peptidyl-amino acid modification            | 0.011        |
|            | GO:0006334                         | nucleosome assembly                         | 0.011        |
|            | GO:0009266                         | response to temperature stimulus            | 0.011        |
|            | GO:0006323                         | DNA packaging                               | 0.013        |
|            | GO:0010608                         | posttranscriptional regulation of gene e... | 0.014        |
|            | GO:0031324                         | negative regulation of cellular metaboli... | 0.015        |
|            | GO:0034728                         | nucleosome organization                     | 0.020        |
|            | GO:0051603                         | proteolysis involved in cellular protein... | 0.024        |
|            | GO:0044265                         | cellular macromolecule catabolic process    | 0.033        |
|            | GO:0001510                         | RNA methylation                             | 0.034        |
|            | GO:0048523                         | negative regulation of cellular process     | 0.036        |
|            | GO:0048831                         | regulation of shoot system development      | 0.036        |
|            | GO:0044257                         | cellular protein catabolic process          | 0.039        |
|            | GO:0071103                         | DNA conformation change                     | 0.044        |
|            | GO:0071826                         | ribonucleoprotein complex subunit organi... | 0.056        |
|            | GO:0022618                         | ribonucleoprotein complex assembly          | 0.058        |
|            | GO:0046113                         | nucleobase catabolic process                | 0.063        |
|            | GO:0009966                         | regulation of signal transduction           | 0.066        |
|            | GO:0051246                         | regulation of protein metabolic process     | 0.071        |
|            | GO:0097305                         | response to alcohol                         | 0.071        |
|            | GO:0032268                         | regulation of cellular protein metabolic... | 0.077        |
|            | GO:0009737                         | response to abscisic acid                   | 0.078        |
|            | GO:0023051                         | regulation of signaling                     | 0.079        |
|            | GO:0009909                         | regulation of flower development            | 0.081        |
| GO:0006366 | transcription by RNA polymerase II | 0.097                                       |              |
| GO:0000151 | ubiquitin ligase complex           | 0.000                                       |              |
| GO:0005622 | intracellular                      | 0.003                                       |              |
| GO:0000785 | chromatin                          | 0.004                                       |              |
| GO:0005694 | chromosome                         | 0.018                                       |              |
| CC         |                                    |                                             |              |

Continued on next page

| GO type | GO ID      | Description                                 | Adj. p-value |
|---------|------------|---------------------------------------------|--------------|
|         | GO:0000228 | nuclear chromosome                          | 0.028        |
|         | GO:0043228 | non-membrane-bounded organelle              | 0.056        |
|         | GO:0043232 | intracellular non-membrane-bounded organ... | 0.056        |
|         | GO:0044454 | nuclear chromosome part                     | 0.077        |
|         | GO:0044427 | chromosomal part                            | 0.091        |
|         | GO:0097159 | organic cyclic compound binding             | 0.009        |
|         | GO:1901363 | heterocyclic compound binding               | 0.010        |
|         | GO:0046914 | transition metal ion binding                | 0.015        |
| MF      | GO:0051082 | unfolded protein binding                    | 0.032        |
|         | GO:0080043 | quercetin 3-O-glucosyltransferase activi... | 0.035        |
|         | GO:0080044 | quercetin 7-O-glucosyltransferase activi... | 0.035        |
|         | GO:0051213 | dioxygenase activity                        | 0.054        |

#### 4.1.10 Leaf - Preflowering - Cluster 10

| GO type    | GO ID      | Description                                 | Adj. p-value |       |
|------------|------------|---------------------------------------------|--------------|-------|
| BP         | GO:0071554 | cell wall organization or biogenesis        | 0.000        |       |
|            | GO:0006793 | phosphorus metabolic process                | 0.000        |       |
|            | GO:0005975 | carbohydrate metabolic process              | 0.000        |       |
|            | GO:0072330 | monocarboxylic acid biosynthetic process    | 0.000        |       |
|            | GO:0046394 | carboxylic acid biosynthetic process        | 0.000        |       |
|            | GO:0016310 | phosphorylation                             | 0.000        |       |
|            | GO:0006629 | lipid metabolic process                     | 0.000        |       |
|            | GO:0000272 | polysaccharide catabolic process            | 0.000        |       |
|            | GO:0030243 | cellulose metabolic process                 | 0.001        |       |
|            | GO:0006633 | fatty acid biosynthetic process             | 0.001        |       |
|            | GO:0006270 | DNA replication initiation                  | 0.003        |       |
|            | GO:0006631 | fatty acid metabolic process                | 0.004        |       |
|            | GO:0030244 | cellulose biosynthetic process              | 0.004        |       |
|            | GO:0044275 | cellular carbohydrate catabolic process     | 0.007        |       |
|            | GO:0051273 | beta-glucan metabolic process               | 0.016        |       |
|            | GO:0006260 | DNA replication                             | 0.019        |       |
|            | GO:0070887 | cellular response to chemical stimulus      | 0.021        |       |
|            | GO:0006468 | protein phosphorylation                     | 0.021        |       |
|            | GO:0044247 | cellular polysaccharide catabolic proces... | 0.021        |       |
|            | GO:0099402 | plant organ development                     | 0.028        |       |
|            | GO:0048438 | floral whorl development                    | 0.028        |       |
|            | GO:0006261 | DNA-dependent DNA replication               | 0.030        |       |
|            | GO:0009251 | glucan catabolic process                    | 0.035        |       |
|            | GO:0048467 | gynoecium development                       | 0.035        |       |
|            | GO:0016311 | dephosphorylation                           | 0.042        |       |
|            | GO:0098662 | inorganic cation transmembrane transport    | 0.042        |       |
|            | GO:0009653 | anatomical structure morphogenesis          | 0.052        |       |
|            | GO:0009250 | glucan biosynthetic process                 | 0.054        |       |
|            | GO:0051274 | beta-glucan biosynthetic process            | 0.062        |       |
|            | GO:0005982 | starch metabolic process                    | 0.075        |       |
|            | GO:0048827 | phyllome development                        | 0.079        |       |
|            | CC         | GO:0005618                                  | cell wall    | 0.000 |
|            |            | GO:0016020                                  | membrane     | 0.000 |
| GO:0005886 |            | plasma membrane                             | 0.000        |       |
| GO:0043596 |            | nuclear replication fork                    | 0.074        |       |
| GO:0044425 |            | membrane part                               | 0.078        |       |
| GO:0005657 |            | replication fork                            | 0.087        |       |
|            | GO:0016787 | hydrolase activity                          | 0.000        |       |
|            | GO:0016829 | lyase activity                              | 0.000        |       |
|            | GO:0016301 | kinase activity                             | 0.000        |       |
|            | GO:0016788 | hydrolase activity, acting on ester bond... | 0.000        |       |
|            | GO:0042578 | phosphoric ester hydrolase activity         | 0.000        |       |
|            | GO:0016773 | phosphotransferase activity, alcohol gro... | 0.000        |       |
|            | GO:0016791 | phosphatase activity                        | 0.000        |       |
|            | GO:0016747 | transferase activity, transferring acyl ... | 0.002        |       |
|            | GO:0004674 | protein serine/threonine kinase activity    | 0.003        |       |

Continued on next page

| GO type | GO ID      | Description                                 | Adj. p-value |
|---------|------------|---------------------------------------------|--------------|
|         | GO:0017076 | purine nucleotide binding                   | 0.003        |
|         | GO:0032555 | purine ribonucleotide binding               | 0.003        |
|         | GO:0032553 | ribonucleotide binding                      | 0.005        |
|         | GO:0097367 | carbohydrate derivative binding             | 0.005        |
|         | GO:0016757 | transferase activity, transferring glyco... | 0.007        |
|         | GO:0043168 | anion binding                               | 0.007        |
|         | GO:0016746 | transferase activity, transferring acyl ... | 0.007        |
|         | GO:0008374 | O-acyltransferase activity                  | 0.010        |
|         | GO:0042626 | ATPase activity, coupled to transmembran... | 0.021        |
|         | GO:0015399 | primary active transmembrane transporter... | 0.024        |
|         | GO:0015405 | P-P-bond-hydrolysis-driven transmembrane... | 0.024        |
|         | GO:0043492 | ATPase activity, coupled to movement of ... | 0.031        |
|         | GO:0004185 | serine-type carboxypeptidase activity       | 0.037        |
|         | GO:0004180 | carboxypeptidase activity                   | 0.037        |
|         | GO:0016887 | ATPase activity                             | 0.042        |
|         | GO:0008236 | serine-type peptidase activity              | 0.047        |
|         | GO:0017171 | serine hydrolase activity                   | 0.047        |
|         | GO:0016462 | pyrophosphatase activity                    | 0.062        |
|         | GO:0016866 | intramolecular transferase activity         | 0.062        |
|         | GO:0070008 | serine-type exopeptidase activity           | 0.071        |
|         | GO:0008289 | lipid binding                               | 0.074        |
|         | GO:0017111 | nucleoside-triphosphatase activity          | 0.074        |
|         | GO:0140097 | catalytic activity, acting on DNA           | 0.074        |
|         | GO:0004683 | calmodulin-dependent protein kinase acti... | 0.077        |
|         | GO:0009931 | calcium-dependent protein serine/threoni... | 0.077        |
|         | GO:0010857 | calcium-dependent protein kinase activit... | 0.077        |
|         | GO:0016818 | hydrolase activity, acting on acid anhyd... | 0.090        |

#### 4.1.11 Leaf - Preflowering - Cluster 11

| GO type | GO ID      | Description                                 | Adj. p-value |
|---------|------------|---------------------------------------------|--------------|
|         | GO:0007165 | signal transduction                         | 0.000        |
|         | GO:0007154 | cell communication                          | 0.000        |
|         | GO:0023052 | signaling                                   | 0.001        |
|         | GO:0071702 | organic substance transport                 | 0.001        |
|         | GO:0015850 | organic hydroxy compound transport          | 0.002        |
|         | GO:0006022 | aminoglycan metabolic process               | 0.003        |
|         | GO:0071705 | nitrogen compound transport                 | 0.003        |
|         | GO:0015791 | polyol transport                            | 0.005        |
|         | GO:0006040 | amino sugar metabolic process               | 0.005        |
|         | GO:0046113 | nucleobase catabolic process                | 0.005        |
|         | GO:0007166 | cell surface receptor signaling pathway     | 0.006        |
|         | GO:0006887 | exocytosis                                  | 0.007        |
|         | GO:0008361 | regulation of cell size                     | 0.008        |
|         | GO:0018196 | peptidyl-asparagine modification            | 0.008        |
|         | GO:0018279 | protein N-linked glycosylation via aspar... | 0.008        |
|         | GO:0019748 | secondary metabolic process                 | 0.011        |
|         | GO:0071495 | cellular response to endogenous stimulus    | 0.011        |
|         | GO:1904659 | glucose transmembrane transport             | 0.011        |
|         | GO:0006796 | phosphate-containing compound metabolic ... | 0.012        |
|         | GO:0010243 | response to organonitrogen compound         | 0.015        |
|         | GO:0009607 | response to biotic stimulus                 | 0.015        |
|         | GO:0032870 | cellular response to hormone stimulus       | 0.017        |
|         | GO:0046323 | glucose import                              | 0.019        |
|         | GO:0006749 | glutathione metabolic process               | 0.020        |
|         | GO:0006884 | cell volume homeostasis                     | 0.020        |
|         | GO:0008645 | hexose transmembrane transport              | 0.020        |
|         | GO:0009992 | cellular water homeostasis                  | 0.020        |
|         | GO:0015749 | monosaccharide transmembrane transport      | 0.020        |
|         | GO:0015793 | glycerol transport                          | 0.020        |
|         | GO:1902531 | regulation of intracellular signal trans... | 0.021        |
|         | GO:0071229 | cellular response to acid chemical          | 0.021        |
|         | GO:0003333 | amino acid transmembrane transport          | 0.021        |
|         | GO:0015807 | L-amino acid transport                      | 0.028        |
|         | GO:0006865 | amino acid transport                        | 0.028        |
| BP      | GO:0098542 | defense response to other organism          | 0.028        |
|         | GO:0032940 | secretion by cell                           | 0.028        |
|         | GO:0006793 | phosphorus metabolic process                | 0.028        |
|         | GO:0015804 | neutral amino acid transport                | 0.035        |
|         | GO:0030104 | water homeostasis                           | 0.036        |
|         | GO:0071310 | cellular response to organic substance      | 0.036        |
|         | GO:0046903 | secretion                                   | 0.037        |
|         | GO:0006836 | neurotransmitter transport                  | 0.041        |
|         | GO:0005996 | monosaccharide metabolic process            | 0.042        |
|         | GO:0006810 | transport                                   | 0.042        |
|         | GO:0008037 | cell recognition                            | 0.042        |
|         | GO:0009755 | hormone-mediated signaling pathway          | 0.042        |

Continued on next page

| GO type | GO ID      | Description                                 | Adj. p-value |
|---------|------------|---------------------------------------------|--------------|
|         | GO:0043207 | response to external biotic stimulus        | 0.042        |
|         | GO:0051707 | response to other organism                  | 0.042        |
|         | GO:0009875 | pollen-pistil interaction                   | 0.042        |
|         | GO:1902475 | L-alpha-amino acid transmembrane transpo... | 0.044        |
|         | GO:0071577 | zinc ion transmembrane transport            | 0.047        |
|         | GO:0051234 | establishment of localization               | 0.049        |
|         | GO:0006487 | protein N-linked glycosylation              | 0.050        |
|         | GO:0048544 | recognition of pollen                       | 0.051        |
|         | GO:0051179 | localization                                | 0.056        |
|         | GO:0006833 | water transport                             | 0.062        |
|         | GO:0042044 | fluid transport                             | 0.062        |
|         | GO:0051704 | multi-organism process                      | 0.065        |
|         | GO:0006829 | zinc ion transport                          | 0.074        |
|         | GO:0010466 | negative regulation of peptidase activit... | 0.075        |
|         | GO:0010951 | negative regulation of endopeptidase act... | 0.075        |
|         | GO:0052547 | regulation of peptidase activity            | 0.075        |
|         | GO:0052548 | regulation of endopeptidase activity        | 0.075        |
|         | GO:0050832 | defense response to fungus                  | 0.076        |
|         | GO:0009057 | macromolecule catabolic process             | 0.076        |
|         | GO:0042445 | hormone metabolic process                   | 0.080        |
|         | GO:0045087 | innate immune response                      | 0.085        |
|         | GO:0009738 | abscisic acid-activated signaling pathwa... | 0.094        |
|         | GO:0015893 | drug transport                              | 0.096        |
|         | GO:0045861 | negative regulation of proteolysis          | 0.097        |
|         | GO:0005798 | Golgi-associated vesicle                    | 0.002        |
|         | GO:0005783 | endoplasmic reticulum                       | 0.002        |
|         | GO:0031226 | intrinsic component of plasma membrane      | 0.003        |
|         | GO:0044459 | plasma membrane part                        | 0.003        |
|         | GO:0099023 | tethering complex                           | 0.003        |
|         | GO:0005911 | cell-cell junction                          | 0.005        |
|         | GO:0030054 | cell junction                               | 0.005        |
|         | GO:0030120 | vesicle coat                                | 0.005        |
|         | GO:0009506 | plasmodesma                                 | 0.005        |
|         | GO:0055044 | symplast                                    | 0.005        |
|         | GO:0005794 | Golgi apparatus                             | 0.008        |
| CC      | GO:0030660 | Golgi-associated vesicle membrane           | 0.015        |
|         | GO:0000145 | exocyst                                     | 0.023        |
|         | GO:0012506 | vesicle membrane                            | 0.026        |
|         | GO:0030662 | coated vesicle membrane                     | 0.041        |
|         | GO:0030659 | cytoplasmic vesicle membrane                | 0.045        |
|         | GO:0031410 | cytoplasmic vesicle                         | 0.051        |
|         | GO:0097708 | intracellular vesicle                       | 0.060        |
|         | GO:0044433 | cytoplasmic vesicle part                    | 0.060        |
|         | GO:0005773 | vacuole                                     | 0.061        |
|         | GO:0030118 | clathrin coat                               | 0.070        |
|         | GO:0031982 | vesicle                                     | 0.077        |
|         | GO:0016607 | nuclear speck                               | 0.091        |
|         | GO:0030135 | coated vesicle                              | 0.091        |
|         | GO:0004497 | monooxygenase activity                      | 0.000        |

Continued on next page



| GO type | GO ID      | Description                                 | Adj. p-value |
|---------|------------|---------------------------------------------|--------------|
|         | GO:0016705 | oxidoreductase activity, acting on paire... | 0.000        |
|         | GO:0016758 | transferase activity, transferring hexos... | 0.000        |
|         | GO:0016757 | transferase activity, transferring glyco... | 0.000        |
|         | GO:1901618 | organic hydroxy compound transmembrane t... | 0.001        |
|         | GO:0000166 | nucleotide binding                          | 0.001        |
|         | GO:1901265 | nucleoside phosphate binding                | 0.001        |
|         | GO:0015166 | polyol transmembrane transporter activit... | 0.002        |
|         | GO:0051213 | dioxygenase activity                        | 0.003        |
|         | GO:0008144 | drug binding                                | 0.003        |
|         | GO:0005215 | transporter activity                        | 0.003        |
|         | GO:0015291 | secondary active transmembrane transport... | 0.004        |
|         | GO:0036094 | small molecule binding                      | 0.006        |
|         | GO:0005524 | ATP binding                                 | 0.007        |
|         | GO:0003824 | catalytic activity                          | 0.008        |
|         | GO:0015168 | glycerol transmembrane transporter activ... | 0.009        |
|         | GO:0015297 | antiporter activity                         | 0.010        |
|         | GO:0004364 | glutathione transferase activity            | 0.011        |
|         | GO:0001871 | pattern binding                             | 0.011        |
|         | GO:0015179 | L-amino acid transmembrane transporter a... | 0.011        |
|         | GO:0022857 | transmembrane transporter activity          | 0.011        |
|         | GO:0030247 | polysaccharide binding                      | 0.011        |
|         | GO:0005355 | glucose transmembrane transporter activi... | 0.012        |
|         | GO:0005372 | water transmembrane transporter activity    | 0.013        |
|         | GO:0015250 | water channel activity                      | 0.013        |
|         | GO:0015254 | glycerol channel activity                   | 0.013        |
|         | GO:0015171 | amino acid transmembrane transporter act... | 0.014        |
|         | GO:0015145 | monosaccharide transmembrane transporter... | 0.020        |
|         | GO:0015149 | hexose transmembrane transporter activit... | 0.020        |
|         | GO:0035639 | purine ribonucleoside triphosphate bindi... | 0.023        |
|         | GO:0005326 | neurotransmitter transporter activity       | 0.025        |
|         | GO:0015174 | basic amino acid transmembrane transport... | 0.025        |
|         | GO:0005385 | zinc ion transmembrane transporter activ... | 0.033        |
|         | GO:0015293 | symporter activity                          | 0.033        |
|         | GO:0030414 | peptidase inhibitor activity                | 0.038        |
|         | GO:0061134 | peptidase regulator activity                | 0.038        |
|         | GO:0004866 | endopeptidase inhibitor activity            | 0.048        |
|         | GO:0015144 | carbohydrate transmembrane transporter a... | 0.048        |
|         | GO:0061135 | endopeptidase regulator activity            | 0.048        |
|         | GO:0015294 | solute:cation symporter activity            | 0.049        |
|         | GO:0015295 | solute:proton symporter activity            | 0.055        |
|         | GO:0022804 | active transmembrane transporter activit... | 0.062        |
|         | GO:0008417 | fucosyltransferase activity                 | 0.077        |
|         | GO:0005351 | carbohydrate:proton symporter activity      | 0.099        |
|         | GO:0005402 | carbohydrate:cation symporter activity      | 0.099        |
|         | GO:0051119 | sugar transmembrane transporter activity    | 0.099        |
|         | GO:0072509 | divalent inorganic cation transmembrane ... | 0.099        |

#### 4.1.12 Leaf - Preflowering - Cluster 12

| GO type | GO ID      | Description                                 | Adj. p-value |
|---------|------------|---------------------------------------------|--------------|
|         | GO:0044281 | small molecule metabolic process            | 0.000        |
|         | GO:0019684 | photosynthesis, light reaction              | 0.000        |
|         | GO:0051188 | cofactor biosynthetic process               | 0.000        |
|         | GO:0019637 | organophosphate metabolic process           | 0.000        |
|         | GO:0046394 | carboxylic acid biosynthetic process        | 0.000        |
|         | GO:0006732 | coenzyme metabolic process                  | 0.000        |
|         | GO:0008610 | lipid biosynthetic process                  | 0.000        |
|         | GO:0022900 | electron transport chain                    | 0.000        |
|         | GO:0044255 | cellular lipid metabolic process            | 0.000        |
|         | GO:0006629 | lipid metabolic process                     | 0.000        |
|         | GO:0005975 | carbohydrate metabolic process              | 0.000        |
|         | GO:0009108 | coenzyme biosynthetic process               | 0.000        |
|         | GO:0009150 | purine ribonucleotide metabolic process     | 0.000        |
|         | GO:0009259 | ribonucleotide metabolic process            | 0.000        |
|         | GO:0019693 | ribose phosphate metabolic process          | 0.000        |
|         | GO:0006163 | purine nucleotide metabolic process         | 0.000        |
|         | GO:0033013 | tetrapyrrole metabolic process              | 0.000        |
|         | GO:0016052 | carbohydrate catabolic process              | 0.000        |
|         | GO:0033014 | tetrapyrrole biosynthetic process           | 0.000        |
|         | GO:0006778 | porphyrin-containing compound metabolic ... | 0.000        |
|         | GO:0046034 | ATP metabolic process                       | 0.000        |
|         | GO:0046434 | organophosphate catabolic process           | 0.000        |
|         | GO:0044262 | cellular carbohydrate metabolic process     | 0.000        |
|         | GO:0009165 | nucleotide biosynthetic process             | 0.000        |
|         | GO:0006631 | fatty acid metabolic process                | 0.000        |
|         | GO:0009156 | ribonucleoside monophosphate biosyntheti... | 0.000        |
|         | GO:0009152 | purine ribonucleotide biosynthetic proce... | 0.000        |
|         | GO:0015994 | chlorophyll metabolic process               | 0.000        |
|         | GO:0071555 | cell wall organization                      | 0.000        |
|         | GO:0009206 | purine ribonucleoside triphosphate biosy... | 0.000        |
|         | GO:0006090 | pyruvate metabolic process                  | 0.000        |
|         | GO:0072525 | pyridine-containing compound biosyntheti... | 0.000        |
|         | GO:0019359 | nicotinamide nucleotide biosynthetic pro... | 0.000        |
|         | GO:0008299 | isoprenoid biosynthetic process             | 0.000        |
|         | GO:0046939 | nucleotide phosphorylation                  | 0.000        |
|         | GO:0006754 | ATP biosynthetic process                    | 0.000        |
|         | GO:0009127 | purine nucleoside monophosphate biosynth... | 0.000        |
|         | GO:0009168 | purine ribonucleoside monophosphate bios... | 0.000        |
|         | GO:0006165 | nucleoside diphosphate phosphorylation      | 0.000        |
|         | GO:1902600 | proton transmembrane transport              | 0.000        |
|         | GO:0098869 | cellular oxidant detoxification             | 0.000        |
|         | GO:0009309 | amine biosynthetic process                  | 0.001        |
|         | GO:0042401 | cellular biogenic amine biosynthetic pro... | 0.001        |
|         | GO:0045491 | xylan metabolic process                     | 0.001        |
|         | GO:0006081 | cellular aldehyde metabolic process         | 0.001        |
|         | GO:0009060 | aerobic respiration                         | 0.002        |

Continued on next page

| GO type | GO ID      | Description                                 | Adj. p-value |
|---------|------------|---------------------------------------------|--------------|
|         | GO:0009768 | photosynthesis, light harvesting in phot... | 0.002        |
|         | GO:0010383 | cell wall polysaccharide metabolic proce... | 0.002        |
|         | GO:0034404 | nucleobase-containing small molecule bio... | 0.002        |
|         | GO:2000652 | regulation of secondary cell wall biogen... | 0.002        |
|         | GO:0006006 | glucose metabolic process                   | 0.002        |
|         | GO:0010109 | regulation of photosynthesis                | 0.002        |
|         | GO:0016311 | dephosphorylation                           | 0.002        |
|         | GO:0044275 | cellular carbohydrate catabolic process     | 0.002        |
|         | GO:0006520 | cellular amino acid metabolic process       | 0.003        |
|         | GO:0006576 | cellular biogenic amine metabolic proces... | 0.003        |
|         | GO:0017004 | cytochrome complex assembly                 | 0.003        |
|         | GO:0010410 | hemicellulose metabolic process             | 0.003        |
|         | GO:0015988 | energy coupled proton transmembrane tran... | 0.003        |
|         | GO:0015991 | ATP hydrolysis coupled proton transport     | 0.003        |
|         | GO:0090662 | ATP hydrolysis coupled transmembrane tra... | 0.003        |
|         | GO:0099131 | ATP hydrolysis coupled ion transmembrane... | 0.003        |
|         | GO:0099132 | ATP hydrolysis coupled cation transmembr... | 0.003        |
|         | GO:0006783 | heme biosynthetic process                   | 0.003        |
|         | GO:0010206 | photosystem II repair                       | 0.004        |
|         | GO:0009664 | plant-type cell wall organization           | 0.004        |
|         | GO:0035336 | long-chain fatty-acyl-CoA metabolic proc... | 0.004        |
|         | GO:1901566 | organonitrogen compound biosynthetic pro... | 0.004        |
|         | GO:0042214 | terpene metabolic process                   | 0.004        |
|         | GO:0006108 | malate metabolic process                    | 0.005        |
|         | GO:0006721 | terpenoid metabolic process                 | 0.005        |
|         | GO:0046365 | monosaccharide catabolic process            | 0.005        |
|         | GO:0000272 | polysaccharide catabolic process            | 0.005        |
|         | GO:0016122 | xanthophyll metabolic process               | 0.006        |
|         | GO:0009773 | photosynthetic electron transport in pho... | 0.006        |
|         | GO:0044036 | cell wall macromolecule metabolic proces... | 0.006        |
|         | GO:0046184 | aldehyde biosynthetic process               | 0.007        |
|         | GO:0042168 | heme metabolic process                      | 0.007        |
|         | GO:0032544 | plastid translation                         | 0.007        |
|         | GO:0044106 | cellular amine metabolic process            | 0.007        |
|         | GO:0044550 | secondary metabolite biosynthetic proces... | 0.008        |
|         | GO:0010143 | cutin biosynthetic process                  | 0.009        |
|         | GO:0035337 | fatty-acyl-CoA metabolic process            | 0.010        |
|         | GO:0032271 | regulation of protein polymerization        | 0.010        |
|         | GO:0046185 | aldehyde catabolic process                  | 0.010        |
|         | GO:0019318 | hexose metabolic process                    | 0.010        |
|         | GO:0007010 | cytoskeleton organization                   | 0.011        |
|         | GO:0005983 | starch catabolic process                    | 0.011        |
|         | GO:1901137 | carbohydrate derivative biosynthetic pro... | 0.012        |
|         | GO:0000162 | tryptophan biosynthetic process             | 0.013        |
|         | GO:0046219 | indolalkylamine biosynthetic process        | 0.013        |
|         | GO:1901135 | carbohydrate derivative metabolic proces... | 0.013        |
|         | GO:0009074 | aromatic amino acid family catabolic pro... | 0.015        |
|         | GO:0046271 | phenylpropanoid catabolic process           | 0.015        |
|         | GO:0010103 | stomatal complex morphogenesis              | 0.015        |

Continued on next page

| GO type | GO ID      | Description                                 | Adj. p-value |
|---------|------------|---------------------------------------------|--------------|
|         | GO:0009409 | response to cold                            | 0.015        |
|         | GO:0030091 | protein repair                              | 0.016        |
|         | GO:0043467 | regulation of generation of precursor me... | 0.017        |
|         | GO:0017001 | antibiotic catabolic process                | 0.018        |
|         | GO:0030244 | cellulose biosynthetic process              | 0.020        |
|         | GO:0016114 | terpenoid biosynthetic process              | 0.021        |
|         | GO:0030041 | actin filament polymerization               | 0.022        |
|         | GO:0030833 | regulation of actin filament polymerizat... | 0.022        |
|         | GO:0045492 | xylan biosynthetic process                  | 0.022        |
|         | GO:0070592 | cell wall polysaccharide biosynthetic pr... | 0.022        |
|         | GO:0030243 | cellulose metabolic process                 | 0.023        |
|         | GO:0044038 | cell wall macromolecule biosynthetic pro... | 0.023        |
|         | GO:0044247 | cellular polysaccharide catabolic proces... | 0.023        |
|         | GO:0070589 | cellular component macromolecule biosynt... | 0.023        |
|         | GO:0009250 | glucan biosynthetic process                 | 0.024        |
|         | GO:0033865 | nucleoside bisphosphate metabolic proces... | 0.024        |
|         | GO:0033875 | ribonucleoside bisphosphate metabolic pr... | 0.024        |
|         | GO:0034032 | purine nucleoside bisphosphate metabolic... | 0.024        |
|         | GO:0009438 | methylglyoxal metabolic process             | 0.025        |
|         | GO:0042182 | ketone catabolic process                    | 0.025        |
|         | GO:0051596 | methylglyoxal catabolic process             | 0.025        |
|         | GO:0043648 | dicarboxylic acid metabolic process         | 0.025        |
|         | GO:1903338 | regulation of cell wall organization or ... | 0.025        |
|         | GO:0043244 | regulation of protein complex disassembl... | 0.026        |
|         | GO:0010345 | suberin biosynthetic process                | 0.027        |
|         | GO:0009251 | glucan catabolic process                    | 0.027        |
|         | GO:0009642 | response to light intensity                 | 0.028        |
|         | GO:0034599 | cellular response to oxidative stress       | 0.028        |
|         | GO:0018298 | protein-chromophore linkage                 | 0.029        |
|         | GO:0046274 | lignin catabolic process                    | 0.029        |
|         | GO:1901607 | alpha-amino acid biosynthetic process       | 0.029        |
|         | GO:0010052 | guard cell differentiation                  | 0.030        |
|         | GO:0006743 | ubiquinone metabolic process                | 0.032        |
|         | GO:0006744 | ubiquinone biosynthetic process             | 0.032        |
|         | GO:0009628 | response to abiotic stimulus                | 0.033        |
|         | GO:0006558 | L-phenylalanine metabolic process           | 0.035        |
|         | GO:0006637 | acyl-CoA metabolic process                  | 0.035        |
|         | GO:0016999 | antibiotic metabolic process                | 0.035        |
|         | GO:0035383 | thioester metabolic process                 | 0.035        |
|         | GO:1902221 | erythrose 4-phosphate/phosphoenolpyruvat... | 0.035        |
|         | GO:1901568 | fatty acid derivative metabolic process     | 0.036        |
|         | GO:0009416 | response to light stimulus                  | 0.037        |
|         | GO:0006089 | lactate metabolic process                   | 0.038        |
|         | GO:0019243 | methylglyoxal catabolic process to D-lac... | 0.038        |
|         | GO:0061727 | methylglyoxal catabolic process to lacta... | 0.038        |
|         | GO:0009308 | amine metabolic process                     | 0.038        |
|         | GO:0006793 | phosphorus metabolic process                | 0.039        |
|         | GO:0008064 | regulation of actin polymerization or de... | 0.040        |
|         | GO:0030832 | regulation of actin filament length         | 0.040        |

Continued on next page

| GO type | GO ID      | Description                                 | Adj. p-value |
|---------|------------|---------------------------------------------|--------------|
|         | GO:0032956 | regulation of actin cytoskeleton organiz... | 0.040        |
|         | GO:0032970 | regulation of actin filament-based proce... | 0.040        |
|         | GO:0090626 | plant epidermis morphogenesis               | 0.040        |
|         | GO:0110053 | regulation of actin filament organizatio... | 0.040        |
|         | GO:0009314 | response to radiation                       | 0.041        |
|         | GO:0042435 | indole-containing compound biosynthetic ... | 0.041        |
|         | GO:0048438 | floral whorl development                    | 0.042        |
|         | GO:0000038 | very long-chain fatty acid metabolic pro... | 0.042        |
|         | GO:1901615 | organic hydroxy compound metabolic proce... | 0.042        |
|         | GO:0098660 | inorganic ion transmembrane transport       | 0.043        |
|         | GO:0016043 | cellular component organization             | 0.047        |
|         | GO:0071214 | cellular response to abiotic stimulus       | 0.049        |
|         | GO:0104004 | cellular response to environmental stimu... | 0.049        |
|         | GO:1901605 | alpha-amino acid metabolic process          | 0.052        |
|         | GO:0042744 | hydrogen peroxide catabolic process         | 0.055        |
|         | GO:0019430 | removal of superoxide radicals              | 0.058        |
|         | GO:0071450 | cellular response to oxygen radical         | 0.058        |
|         | GO:0071451 | cellular response to superoxide             | 0.058        |
|         | GO:1902903 | regulation of supramolecular fiber organ... | 0.058        |
|         | GO:0044282 | small molecule catabolic process            | 0.059        |
|         | GO:0015672 | monovalent inorganic cation transport       | 0.059        |
|         | GO:0042548 | regulation of photosynthesis, light reac... | 0.063        |
|         | GO:0006119 | oxidative phosphorylation                   | 0.063        |
|         | GO:0042773 | ATP synthesis coupled electron transport    | 0.063        |
|         | GO:0009058 | biosynthetic process                        | 0.063        |
|         | GO:0045037 | protein import into chloroplast stroma      | 0.063        |
|         | GO:1901617 | organic hydroxy compound biosynthetic pr... | 0.063        |
|         | GO:0071478 | cellular response to radiation              | 0.064        |
|         | GO:0071482 | cellular response to light stimulus         | 0.065        |
|         | GO:0009395 | phospholipid catabolic process              | 0.067        |
|         | GO:0015985 | energy coupled proton transport, down el... | 0.068        |
|         | GO:0015986 | ATP synthesis coupled proton transport      | 0.068        |
|         | GO:0046486 | glycerolipid metabolic process              | 0.068        |
|         | GO:0008154 | actin polymerization or depolymerization    | 0.069        |
|         | GO:1901401 | regulation of tetrapyrrole metabolic pro... | 0.070        |
|         | GO:0006595 | polyamine metabolic process                 | 0.075        |
|         | GO:0022904 | respiratory electron transport chain        | 0.077        |
|         | GO:0051261 | protein depolymerization                    | 0.079        |
|         | GO:0019682 | glyceraldehyde-3-phosphate metabolic pro... | 0.081        |
|         | GO:1901463 | regulation of tetrapyrrole biosynthetic ... | 0.082        |
|         | GO:0006644 | phospholipid metabolic process              | 0.083        |
|         | GO:0009943 | adaxial/abaxial axis specification          | 0.086        |
|         | GO:0009944 | polarity specification of adaxial/abaxia... | 0.086        |
|         | GO:0044249 | cellular biosynthetic process               | 0.086        |
|         | GO:0048235 | pollen sperm cell differentiation           | 0.087        |
|         | GO:0009955 | adaxial/abaxial pattern specification       | 0.089        |
|         | GO:0072593 | reactive oxygen species metabolic proces... | 0.089        |
|         | GO:0043038 | amino acid activation                       | 0.092        |
|         | GO:0043039 | tRNA aminoacylation                         | 0.092        |

Continued on next page

| GO type | GO ID      | Description                                 | Adj. p-value |
|---------|------------|---------------------------------------------|--------------|
|         | GO:0051493 | regulation of cytoskeleton organization     | 0.092        |
|         | GO:1901576 | organic substance biosynthetic process      | 0.092        |
|         | GO:0046364 | monosaccharide biosynthetic process         | 0.092        |
|         | GO:0061024 | membrane organization                       | 0.092        |
|         | GO:0080167 | response to karrikin                        | 0.099        |
|         | GO:0031977 | thylakoid lumen                             | 0.000        |
|         | GO:0009521 | photosystem                                 | 0.000        |
|         | GO:1990204 | oxidoreductase complex                      | 0.000        |
|         | GO:0005856 | cytoskeleton                                | 0.000        |
|         | GO:0044430 | cytoskeletal part                           | 0.000        |
|         | GO:0005875 | microtubule associated complex              | 0.000        |
|         | GO:0031969 | chloroplast membrane                        | 0.000        |
|         | GO:0005739 | mitochondrion                               | 0.000        |
|         | GO:0044429 | mitochondrial part                          | 0.000        |
|         | GO:0016469 | proton-transporting two-sector ATPase co... | 0.000        |
|         | GO:0005743 | mitochondrial inner membrane                | 0.000        |
|         | GO:0005874 | microtubule                                 | 0.000        |
|         | GO:0070469 | respiratory chain                           | 0.000        |
|         | GO:0033178 | proton-transporting two-sector ATPase co... | 0.000        |
|         | GO:0009295 | nucleoid                                    | 0.000        |
|         | GO:0098803 | respiratory chain complex                   | 0.000        |
|         | GO:0009528 | plastid inner membrane                      | 0.000        |
|         | GO:0005746 | mitochondrial respiratory chain             | 0.000        |
|         | GO:0009654 | photosystem II oxygen evolving complex      | 0.001        |
|         | GO:0042646 | plastid nucleoid                            | 0.001        |
|         | GO:0009707 | chloroplast outer membrane                  | 0.001        |
|         | GO:0010319 | stromule                                    | 0.001        |
| CC      | GO:0005618 | cell wall                                   | 0.001        |
|         | GO:0030312 | external encapsulating structure            | 0.001        |
|         | GO:0044424 | intracellular part                          | 0.001        |
|         | GO:0005622 | intracellular                               | 0.002        |
|         | GO:0009527 | plastid outer membrane                      | 0.002        |
|         | GO:0005753 | mitochondrial proton-transporting ATP sy... | 0.002        |
|         | GO:0009706 | chloroplast inner membrane                  | 0.002        |
|         | GO:0098798 | mitochondrial protein complex               | 0.002        |
|         | GO:0005881 | cytoplasmic microtubule                     | 0.003        |
|         | GO:0030863 | cortical cytoskeleton                       | 0.003        |
|         | GO:0030981 | cortical microtubule cytoskeleton           | 0.003        |
|         | GO:0030964 | NADH dehydrogenase complex                  | 0.003        |
|         | GO:0045271 | respiratory chain complex I                 | 0.003        |
|         | GO:0005747 | mitochondrial respiratory chain complex ... | 0.005        |
|         | GO:0045259 | proton-transporting ATP synthase complex    | 0.005        |
|         | GO:0055028 | cortical microtubule                        | 0.010        |
|         | GO:0042644 | chloroplast nucleoid                        | 0.013        |
|         | GO:0009524 | phragmoplast                                | 0.013        |
|         | GO:0044464 | cell part                                   | 0.019        |
|         | GO:0005623 | cell                                        | 0.020        |
|         | GO:0009505 | plant-type cell wall                        | 0.024        |
|         | GO:0000229 | cytoplasmic chromosome                      | 0.077        |

Continued on next page

| GO type | GO ID      | Description                                 | Adj. p-value |
|---------|------------|---------------------------------------------|--------------|
|         | GO:0009508 | plastid chromosome                          | 0.099        |
|         | GO:0016491 | oxidoreductase activity                     | 0.000        |
|         | GO:0016829 | lyase activity                              | 0.000        |
|         | GO:0016788 | hydrolase activity, acting on ester bond... | 0.000        |
|         | GO:0016655 | oxidoreductase activity, acting on NAD(P... | 0.000        |
|         | GO:0016791 | phosphatase activity                        | 0.000        |
|         | GO:0016747 | transferase activity, transferring acyl ... | 0.000        |
|         | GO:0050662 | coenzyme binding                            | 0.000        |
|         | GO:0003954 | NADH dehydrogenase activity                 | 0.000        |
|         | GO:0016614 | oxidoreductase activity, acting on CH-OH... | 0.001        |
|         | GO:0008236 | serine-type peptidase activity              | 0.002        |
|         | GO:0017171 | serine hydrolase activity                   | 0.002        |
|         | GO:0016790 | thiolester hydrolase activity               | 0.003        |
|         | GO:0016838 | carbon-oxygen lyase activity, acting on ... | 0.003        |
|         | GO:0016853 | isomerase activity                          | 0.003        |
|         | GO:0016830 | carbon-carbon lyase activity                | 0.004        |
|         | GO:0044769 | ATPase activity, coupled to transmembran... | 0.004        |
|         | GO:0004252 | serine-type endopeptidase activity          | 0.004        |
|         | GO:0016778 | diphosphotransferase activity               | 0.004        |
|         | GO:0016616 | oxidoreductase activity, acting on the C... | 0.005        |
|         | GO:0080019 | fatty-acyl-CoA reductase (alcohol-formin... | 0.006        |
|         | GO:0016776 | phosphotransferase activity, phosphate g... | 0.006        |
|         | GO:0016866 | intramolecular transferase activity         | 0.006        |
|         | GO:0016620 | oxidoreductase activity, acting on the a... | 0.006        |
|         | GO:0016615 | malate dehydrogenase activity               | 0.006        |
|         | GO:0019203 | carbohydrate phosphatase activity           | 0.007        |
|         | GO:0050308 | sugar-phosphatase activity                  | 0.008        |
|         | GO:0016887 | ATPase activity                             | 0.008        |
|         | GO:0008374 | O-acyltransferase activity                  | 0.009        |
|         | GO:0016759 | cellulose synthase activity                 | 0.009        |
|         | GO:0016760 | cellulose synthase (UDP-forming) activit... | 0.009        |
|         | GO:0016903 | oxidoreductase activity, acting on the a... | 0.009        |
|         | GO:0031072 | heat shock protein binding                  | 0.009        |
|         | GO:0051539 | 4 iron, 4 sulfur cluster binding            | 0.009        |
|         | GO:0010333 | terpene synthase activity                   | 0.009        |
|         | GO:0051536 | iron-sulfur cluster binding                 | 0.009        |
|         | GO:0051540 | metal cluster binding                       | 0.009        |
|         | GO:0016765 | transferase activity, transferring alkyl... | 0.010        |
|         | GO:0016413 | O-acetyltransferase activity                | 0.010        |
|         | GO:0019205 | nucleobase-containing compound kinase ac... | 0.011        |
|         | GO:0140101 | catalytic activity, acting on a tRNA        | 0.011        |
|         | GO:0016741 | transferase activity, transferring one-c... | 0.012        |
|         | GO:0016684 | oxidoreductase activity, acting on perox... | 0.012        |
|         | GO:0016762 | xyloglucan:xyloglucosyl transferase acti... | 0.013        |
|         | GO:0016836 | hydro-lyase activity                        | 0.014        |
|         | GO:0051087 | chaperone binding                           | 0.017        |
|         | GO:0016627 | oxidoreductase activity, acting on the C... | 0.017        |
|         | GO:0016407 | acetyltransferase activity                  | 0.017        |
|         | GO:0016814 | hydrolase activity, acting on carbon-nit... | 0.017        |

Continued on next page

MF

| GO type | GO ID      | Description                                 | Adj. p-value |
|---------|------------|---------------------------------------------|--------------|
|         | GO:0042349 | guiding stereospecific synthesis activit... | 0.017        |
|         | GO:0008574 | ATP-dependent microtubule motor activity... | 0.018        |
|         | GO:0050660 | flavin adenine dinucleotide binding         | 0.018        |
|         | GO:1990939 | ATP-dependent microtubule motor activity    | 0.018        |
|         | GO:0042623 | ATPase activity, coupled                    | 0.018        |
|         | GO:0008168 | methyltransferase activity                  | 0.021        |
|         | GO:0046961 | proton-transporting ATPase activity, rot... | 0.021        |
|         | GO:0051287 | NAD binding                                 | 0.021        |
|         | GO:0016868 | intramolecular transferase activity, pho... | 0.021        |
|         | GO:0004601 | peroxidase activity                         | 0.024        |
|         | GO:0017111 | nucleoside-triphosphatase activity          | 0.026        |
|         | GO:0016717 | oxidoreductase activity, acting on paire... | 0.029        |
|         | GO:0031409 | pigment binding                             | 0.031        |
|         | GO:0016462 | pyrophosphatase activity                    | 0.034        |
|         | GO:0036442 | proton-exporting ATPase activity            | 0.036        |
|         | GO:0046556 | alpha-L-arabinofuranosidase activity        | 0.036        |
|         | GO:0046933 | proton-transporting ATP synthase activit... | 0.036        |
|         | GO:0016799 | hydrolase activity, hydrolyzing N-glycos... | 0.037        |
|         | GO:0033764 | steroid dehydrogenase activity, acting o... | 0.038        |
|         | GO:0052716 | hydroquinone:oxygen oxidoreductase activ... | 0.039        |
|         | GO:0016861 | intramolecular oxidoreductase activity, ... | 0.040        |
|         | GO:0070011 | peptidase activity, acting on L-amino ac... | 0.042        |
|         | GO:2001070 | starch binding                              | 0.043        |
|         | GO:0004312 | fatty acid synthase activity                | 0.044        |
|         | GO:0052689 | carboxylic ester hydrolase activity         | 0.050        |
|         | GO:0016818 | hydrolase activity, acting on acid anhyd... | 0.058        |
|         | GO:0019104 | DNA N-glycosylase activity                  | 0.058        |
|         | GO:0051015 | actin filament binding                      | 0.058        |
|         | GO:0003779 | actin binding                               | 0.061        |
|         | GO:0008233 | peptidase activity                          | 0.061        |
|         | GO:0015399 | primary active transmembrane transporter... | 0.061        |
|         | GO:0015405 | P-P-bond-hydrolysis-driven transmembrane... | 0.061        |
|         | GO:0002161 | aminoacyl-tRNA editing activity             | 0.063        |
|         | GO:0003854 | 3-beta-hydroxy-delta5-steroid dehydrogen... | 0.064        |
|         | GO:0051537 | 2 iron, 2 sulfur cluster binding            | 0.067        |
|         | GO:0140097 | catalytic activity, acting on DNA           | 0.070        |
|         | GO:0016817 | hydrolase activity, acting on acid anhyd... | 0.070        |
|         | GO:0008252 | nucleotidase activity                       | 0.074        |
|         | GO:0043022 | ribosome binding                            | 0.074        |
|         | GO:0050661 | NADP binding                                | 0.075        |
|         | GO:0004743 | pyruvate kinase activity                    | 0.078        |
|         | GO:0019829 | cation-transporting ATPase activity         | 0.078        |
|         | GO:0022853 | active ion transmembrane transporter act... | 0.078        |
|         | GO:0030955 | potassium ion binding                       | 0.078        |
|         | GO:0031420 | alkali metal ion binding                    | 0.078        |
|         | GO:0042625 | ATPase coupled ion transmembrane transpo... | 0.078        |
|         | GO:0016229 | steroid dehydrogenase activity              | 0.079        |
|         | GO:0019238 | cyclohydrolase activity                     | 0.080        |
|         | GO:0042626 | ATPase activity, coupled to transmembran... | 0.080        |

Continued on next page



---

| GO type | GO ID      | Description                                 | Adj. p-value |
|---------|------------|---------------------------------------------|--------------|
|         | GO:0016899 | oxidoreductase activity, acting on the C... | 0.083        |
|         | GO:0016740 | transferase activity                        | 0.091        |

---

#### 4.1.13 Leaf - Preflowering - Cluster 13

| GO type | GO ID      | Description                                 | Adj. p-value |
|---------|------------|---------------------------------------------|--------------|
|         | GO:0006091 | generation of precursor metabolites and ... | 0.001        |
|         | GO:0018205 | peptidyl-lysine modification                | 0.001        |
|         | GO:0006457 | protein folding                             | 0.001        |
|         | GO:0019637 | organophosphate metabolic process           | 0.003        |
|         | GO:0015979 | photosynthesis                              | 0.003        |
|         | GO:0003006 | developmental process involved in reprod... | 0.004        |
|         | GO:0051188 | cofactor biosynthetic process               | 0.004        |
|         | GO:0008202 | steroid metabolic process                   | 0.006        |
|         | GO:0046185 | aldehyde catabolic process                  | 0.007        |
|         | GO:0009628 | response to abiotic stimulus                | 0.007        |
|         | GO:0009266 | response to temperature stimulus            | 0.012        |
|         | GO:0016569 | covalent chromatin modification             | 0.012        |
|         | GO:0016570 | histone modification                        | 0.012        |
|         | GO:0015980 | energy derivation by oxidation of organi... | 0.013        |
|         | GO:0006163 | purine nucleotide metabolic process         | 0.013        |
|         | GO:0006732 | coenzyme metabolic process                  | 0.014        |
|         | GO:0006753 | nucleoside phosphate metabolic process      | 0.014        |
|         | GO:0051276 | chromosome organization                     | 0.016        |
|         | GO:0006089 | lactate metabolic process                   | 0.017        |
|         | GO:0019243 | methylglyoxal catabolic process to D-lac... | 0.017        |
|         | GO:0061727 | methylglyoxal catabolic process to lacta... | 0.017        |
|         | GO:0009117 | nucleotide metabolic process                | 0.019        |
|         | GO:0009259 | ribonucleotide metabolic process            | 0.019        |
|         | GO:0009150 | purine ribonucleotide metabolic process     | 0.019        |
|         | GO:0016053 | organic acid biosynthetic process           | 0.020        |
|         | GO:0046394 | carboxylic acid biosynthetic process        | 0.020        |
|         | GO:0040029 | regulation of gene expression, epigeneti... | 0.026        |
|         | GO:0071214 | cellular response to abiotic stimulus       | 0.026        |
|         | GO:0104004 | cellular response to environmental stimu... | 0.026        |
|         | GO:0005977 | glycogen metabolic process                  | 0.028        |
|         | GO:0006112 | energy reserve metabolic process            | 0.028        |
|         | GO:0008652 | cellular amino acid biosynthetic process    | 0.029        |
|         | GO:0009790 | embryo development                          | 0.029        |
|         | GO:0048608 | reproductive structure development          | 0.031        |
|         | GO:0061458 | reproductive system development             | 0.031        |
|         | GO:0009438 | methylglyoxal metabolic process             | 0.034        |
|         | GO:0042182 | ketone catabolic process                    | 0.034        |
|         | GO:0051596 | methylglyoxal catabolic process             | 0.034        |
|         | GO:0055114 | oxidation-reduction process                 | 0.034        |
|         | GO:1901607 | alpha-amino acid biosynthetic process       | 0.034        |
|         | GO:0018193 | peptidyl-amino acid modification            | 0.035        |
|         | GO:0044281 | small molecule metabolic process            | 0.036        |
|         | GO:0009791 | post-embryonic development                  | 0.037        |
| BP      | GO:0009108 | coenzyme biosynthetic process               | 0.037        |
|         | GO:0022414 | reproductive process                        | 0.038        |
|         | GO:0000003 | reproduction                                | 0.040        |

Continued on next page

| GO type | GO ID      | Description                                 | Adj. p-value |
|---------|------------|---------------------------------------------|--------------|
|         | GO:0009735 | response to cytokinin                       | 0.040        |
|         | GO:0009144 | purine nucleoside triphosphate metabolic... | 0.046        |
|         | GO:0009205 | purine ribonucleoside triphosphate metab... | 0.046        |
|         | GO:0034599 | cellular response to oxidative stress       | 0.046        |
|         | GO:0019693 | ribose phosphate metabolic process          | 0.046        |
|         | GO:0046434 | organophosphate catabolic process           | 0.046        |
|         | GO:0048609 | multicellular organismal reproductive pr... | 0.047        |
|         | GO:0009199 | ribonucleoside triphosphate metabolic pr... | 0.047        |
|         | GO:0006473 | protein acetylation                         | 0.048        |
|         | GO:0005976 | polysaccharide metabolic process            | 0.049        |
|         | GO:0043543 | protein acylation                           | 0.055        |
|         | GO:0016458 | gene silencing                              | 0.059        |
|         | GO:0006325 | chromatin organization                      | 0.059        |
|         | GO:0009123 | nucleoside monophosphate metabolic proce... | 0.059        |
|         | GO:0090407 | organophosphate biosynthetic process        | 0.060        |
|         | GO:0009141 | nucleoside triphosphate metabolic proces... | 0.062        |
|         | GO:0051186 | cofactor metabolic process                  | 0.064        |
|         | GO:0072521 | purine-containing compound metabolic pro... | 0.070        |
|         | GO:1901362 | organic cyclic compound biosynthetic pro... | 0.073        |
|         | GO:0009793 | embryo development ending in seed dorman... | 0.075        |
|         | GO:0006520 | cellular amino acid metabolic process       | 0.075        |
|         | GO:1901293 | nucleoside phosphate biosynthetic proces... | 0.075        |
|         | GO:1901605 | alpha-amino acid metabolic process          | 0.079        |
|         | GO:0009161 | ribonucleoside monophosphate metabolic p... | 0.080        |
|         | GO:0006165 | nucleoside diphosphate phosphorylation      | 0.082        |
|         | GO:0007275 | multicellular organism development          | 0.082        |
|         | GO:2000113 | negative regulation of cellular macromol... | 0.084        |
|         | GO:0005978 | glycogen biosynthetic process               | 0.088        |
|         | GO:0048868 | pollen tube development                     | 0.090        |
|         | GO:0005982 | starch metabolic process                    | 0.091        |
|         | GO:0016052 | carbohydrate catabolic process              | 0.091        |
|         | GO:0034404 | nucleobase-containing small molecule bio... | 0.092        |
|         | GO:0006637 | acyl-CoA metabolic process                  | 0.094        |
|         | GO:0009126 | purine nucleoside monophosphate metaboli... | 0.094        |
|         | GO:0009165 | nucleotide biosynthetic process             | 0.094        |
|         | GO:0009167 | purine ribonucleoside monophosphate meta... | 0.094        |
|         | GO:0035383 | thioester metabolic process                 | 0.094        |
|         | GO:0048316 | seed development                            | 0.094        |
|         | GO:0072330 | monocarboxylic acid biosynthetic process    | 0.094        |
|         | GO:0000103 | sulfate assimilation                        | 0.100        |
|         | GO:0042180 | cellular ketone metabolic process           | 0.100        |
|         | GO:0009579 | thylakoid                                   | 0.000        |
|         | GO:0009526 | plastid envelope                            | 0.000        |
|         | GO:0009534 | chloroplast thylakoid                       | 0.000        |
|         | GO:0042651 | thylakoid membrane                          | 0.000        |
|         | GO:0042170 | plastid membrane                            | 0.006        |
|         | GO:0031969 | chloroplast membrane                        | 0.009        |
| CC      | GO:1990204 | oxidoreductase complex                      | 0.027        |
|         | GO:0031984 | organelle subcompartment                    | 0.036        |

Continued on next page

| GO type | GO ID      | Description                                 | Adj. p-value |
|---------|------------|---------------------------------------------|--------------|
|         | GO:0031225 | anchored component of membrane              | 0.043        |
|         | GO:0030532 | small nuclear ribonucleoprotein complex     | 0.047        |
|         | GO:0097525 | spliceosomal snRNP complex                  | 0.047        |
|         | GO:0120114 | Sm-like protein family complex              | 0.047        |
|         | GO:0046658 | anchored component of plasma membrane       | 0.051        |
|         | GO:0016620 | oxidoreductase activity, acting on the a... | 0.019        |
|         | GO:0016903 | oxidoreductase activity, acting on the a... | 0.019        |
|         | GO:0016407 | acetyltransferase activity                  | 0.036        |
|         | GO:0003824 | catalytic activity                          | 0.047        |
| MF      | GO:0016774 | phosphotransferase activity, carboxyl gr... | 0.068        |
|         | GO:0008080 | N-acetyltransferase activity                | 0.078        |
|         | GO:0043621 | protein self-association                    | 0.086        |
|         | GO:2001070 | starch binding                              | 0.086        |
|         | GO:0042393 | histone binding                             | 0.093        |
|         | GO:0051539 | 4 iron, 4 sulfur cluster binding            | 0.093        |

#### 4.1.14 Leaf - Preflowering - Cluster 14

| GO type | GO ID      | Description                                 | Adj. p-value |
|---------|------------|---------------------------------------------|--------------|
|         | GO:0060255 | regulation of macromolecule metabolic pr... | 0.000        |
|         | GO:0019219 | regulation of nucleobase-containing comp... | 0.000        |
|         | GO:0051252 | regulation of RNA metabolic process         | 0.000        |
|         | GO:0043161 | proteasome-mediated ubiquitin-dependent ... | 0.000        |
|         | GO:0010498 | proteasomal protein catabolic process       | 0.000        |
|         | GO:0006518 | peptide metabolic process                   | 0.000        |
|         | GO:0015850 | organic hydroxy compound transport          | 0.001        |
|         | GO:0043603 | cellular amide metabolic process            | 0.001        |
|         | GO:0000375 | RNA splicing, via transesterification re... | 0.003        |
|         | GO:0006749 | glutathione metabolic process               | 0.003        |
|         | GO:0008645 | hexose transmembrane transport              | 0.004        |
|         | GO:0046323 | glucose import                              | 0.005        |
|         | GO:0043632 | modification-dependent macromolecule cat... | 0.006        |
|         | GO:0031497 | chromatin assembly                          | 0.008        |
|         | GO:0005996 | monosaccharide metabolic process            | 0.010        |
|         | GO:0019941 | modification-dependent protein catabolic... | 0.010        |
|         | GO:1901565 | organonitrogen compound catabolic proces... | 0.010        |
|         | GO:0006884 | cell volume homeostasis                     | 0.011        |
|         | GO:0009992 | cellular water homeostasis                  | 0.011        |
|         | GO:0015793 | glycerol transport                          | 0.011        |
|         | GO:0008361 | regulation of cell size                     | 0.016        |
|         | GO:0006334 | nucleosome assembly                         | 0.018        |
|         | GO:0030104 | water homeostasis                           | 0.018        |
| BP      | GO:0006511 | ubiquitin-dependent protein catabolic pr... | 0.022        |
|         | GO:0006836 | neurotransmitter transport                  | 0.022        |
|         | GO:0006333 | chromatin assembly or disassembly           | 0.022        |
|         | GO:0006022 | aminoglycan metabolic process               | 0.026        |
|         | GO:0006026 | aminoglycan catabolic process               | 0.030        |
|         | GO:0006030 | chitin metabolic process                    | 0.030        |
|         | GO:0006032 | chitin catabolic process                    | 0.030        |
|         | GO:0044257 | cellular protein catabolic process          | 0.030        |
|         | GO:0046348 | amino sugar catabolic process               | 0.030        |
|         | GO:0051603 | proteolysis involved in cellular protein... | 0.030        |
|         | GO:1901072 | glucosamine-containing compound cataboli... | 0.030        |
|         | GO:1901071 | glucosamine-containing compound metaboli... | 0.030        |
|         | GO:0006952 | defense response                            | 0.032        |
|         | GO:0006323 | DNA packaging                               | 0.038        |
|         | GO:0044550 | secondary metabolite biosynthetic proces... | 0.038        |
|         | GO:0000466 | maturation of 5.8S rRNA from tricistroni... | 0.052        |
|         | GO:0044265 | cellular macromolecule catabolic process    | 0.057        |
|         | GO:0000460 | maturation of 5.8S rRNA                     | 0.062        |
|         | GO:0006833 | water transport                             | 0.076        |
|         | GO:0042044 | fluid transport                             | 0.076        |
|         | GO:0034728 | nucleosome organization                     | 0.080        |
|         | GO:0010928 | regulation of auxin mediated signaling p... | 0.080        |
|         | GO:0006575 | cellular modified amino acid metabolic p... | 0.081        |

Continued on next page

| GO type | GO ID      | Description                                 | Adj. p-value |
|---------|------------|---------------------------------------------|--------------|
|         | GO:0008643 | carbohydrate transport                      | 0.087        |
|         | GO:0000151 | ubiquitin ligase complex                    | 0.000        |
|         | GO:0005681 | spliceosomal complex                        | 0.000        |
|         | GO:0071013 | catalytic step 2 spliceosome                | 0.003        |
|         | GO:0044425 | membrane part                               | 0.008        |
|         | GO:0030120 | vesicle coat                                | 0.035        |
|         | GO:0099023 | tethering complex                           | 0.038        |
|         | GO:0016591 | DNA-directed RNA polymerase II, holoenzy... | 0.038        |
|         | GO:0005798 | Golgi-associated vesicle                    | 0.050        |
|         | GO:0005852 | eukaryotic translation initiation factor... | 0.051        |
|         | GO:0080008 | Cul4-RING E3 ubiquitin ligase complex       | 0.057        |
| CC      | GO:0044459 | plasma membrane part                        | 0.058        |
|         | GO:0005911 | cell-cell junction                          | 0.059        |
|         | GO:0030054 | cell junction                               | 0.059        |
|         | GO:0009506 | plasmodesma                                 | 0.062        |
|         | GO:0055044 | symplast                                    | 0.062        |
|         | GO:0005689 | U12-type spliceosomal complex               | 0.066        |
|         | GO:0005886 | plasma membrane                             | 0.066        |
|         | GO:0030687 | preribosome, large subunit precursor        | 0.066        |
|         | GO:0031226 | intrinsic component of plasma membrane      | 0.066        |
|         | GO:0005686 | U2 snRNP                                    | 0.085        |
|         | GO:0000786 | nucleosome                                  | 0.096        |
|         | GO:0004497 | monooxygenase activity                      | 0.000        |
|         | GO:0016705 | oxidoreductase activity, acting on paire... | 0.000        |
|         | GO:1901618 | organic hydroxy compound transmembrane t... | 0.000        |
|         | GO:0005355 | glucose transmembrane transporter activi... | 0.005        |
|         | GO:0015145 | monosaccharide transmembrane transporter... | 0.006        |
|         | GO:0004364 | glutathione transferase activity            | 0.007        |
|         | GO:0015149 | hexose transmembrane transporter activit... | 0.008        |
|         | GO:0015168 | glycerol transmembrane transporter activ... | 0.008        |
|         | GO:0097159 | organic cyclic compound binding             | 0.008        |
|         | GO:1901363 | heterocyclic compound binding               | 0.008        |
|         | GO:0005372 | water transmembrane transporter activity    | 0.012        |
|         | GO:0015250 | water channel activity                      | 0.012        |
|         | GO:0015254 | glycerol channel activity                   | 0.012        |
|         | GO:0005326 | neurotransmitter transporter activity       | 0.019        |
| MF      | GO:0015174 | basic amino acid transmembrane transport... | 0.019        |
|         | GO:0003677 | DNA binding                                 | 0.025        |
|         | GO:0004568 | chitinase activity                          | 0.027        |
|         | GO:0015291 | secondary active transmembrane transport... | 0.029        |
|         | GO:0015293 | symporter activity                          | 0.030        |
|         | GO:0016757 | transferase activity, transferring glyco... | 0.030        |
|         | GO:0051213 | dioxygenase activity                        | 0.030        |
|         | GO:0030246 | carbohydrate binding                        | 0.033        |
|         | GO:0048037 | cofactor binding                            | 0.035        |
|         | GO:0015294 | solute:cation symporter activity            | 0.054        |
|         | GO:0003700 | DNA binding transcription factor activit... | 0.070        |
|         | GO:0005351 | carbohydrate:proton symporter activity      | 0.083        |
|         | GO:0005402 | carbohydrate:cation symporter activity      | 0.083        |

Continued on next page

---

| GO type | GO ID      | Description                                 | Adj. p-value |
|---------|------------|---------------------------------------------|--------------|
|         | GO:0015295 | solute:proton symporter activity            | 0.083        |
|         | GO:0015179 | L-amino acid transmembrane transporter a... | 0.083        |

---

#### 4.1.15 Leaf - Preflowering - Cluster 15

| GO type | GO ID      | Description                                 | Adj. p-value |
|---------|------------|---------------------------------------------|--------------|
|         | GO:0051188 | cofactor biosynthetic process               | 0.000        |
|         | GO:0046394 | carboxylic acid biosynthetic process        | 0.000        |
|         | GO:0019637 | organophosphate metabolic process           | 0.000        |
|         | GO:0009699 | phenylpropanoid biosynthetic process        | 0.000        |
|         | GO:0006732 | coenzyme metabolic process                  | 0.000        |
|         | GO:0009117 | nucleotide metabolic process                | 0.000        |
|         | GO:0008610 | lipid biosynthetic process                  | 0.000        |
|         | GO:0009150 | purine ribonucleotide metabolic process     | 0.000        |
|         | GO:0016052 | carbohydrate catabolic process              | 0.000        |
|         | GO:0009108 | coenzyme biosynthetic process               | 0.000        |
|         | GO:0006629 | lipid metabolic process                     | 0.000        |
|         | GO:0046034 | ATP metabolic process                       | 0.000        |
|         | GO:0033014 | tetrapyrrole biosynthetic process           | 0.000        |
|         | GO:0046434 | organophosphate catabolic process           | 0.000        |
|         | GO:0006779 | porphyrin-containing compound biosynthes... | 0.000        |
|         | GO:0006778 | porphyrin-containing compound metabolic ... | 0.000        |
|         | GO:0090407 | organophosphate biosynthetic process        | 0.000        |
|         | GO:0009165 | nucleotide biosynthetic process             | 0.000        |
|         | GO:0006165 | nucleoside diphosphate phosphorylation      | 0.000        |
|         | GO:0006631 | fatty acid metabolic process                | 0.000        |
|         | GO:0009206 | purine ribonucleoside triphosphate biosy... | 0.000        |
|         | GO:0009073 | aromatic amino acid family biosynthetic ... | 0.000        |
|         | GO:0006164 | purine nucleotide biosynthetic process      | 0.000        |
|         | GO:0046939 | nucleotide phosphorylation                  | 0.000        |
|         | GO:0044264 | cellular polysaccharide metabolic proces... | 0.000        |
|         | GO:0019359 | nicotinamide nucleotide biosynthetic pro... | 0.000        |
|         | GO:0009124 | nucleoside monophosphate biosynthetic pr... | 0.000        |
|         | GO:0009156 | ribonucleoside monophosphate biosynthesi... | 0.000        |
|         | GO:0009152 | purine ribonucleotide biosynthetic proce... | 0.000        |
|         | GO:0019363 | pyridine nucleotide biosynthetic process    | 0.000        |
|         | GO:0009260 | ribonucleotide biosynthetic process         | 0.000        |
|         | GO:0046390 | ribose phosphate biosynthetic process       | 0.000        |
|         | GO:0071555 | cell wall organization                      | 0.000        |
|         | GO:1902600 | proton transmembrane transport              | 0.000        |
|         | GO:0009834 | plant-type secondary cell wall biogenesi... | 0.000        |
|         | GO:0008299 | isoprenoid biosynthetic process             | 0.000        |
|         | GO:0008652 | cellular amino acid biosynthetic process    | 0.001        |
|         | GO:0009808 | lignin metabolic process                    | 0.002        |
|         | GO:0006081 | cellular aldehyde metabolic process         | 0.002        |
|         | GO:0033692 | cellular polysaccharide biosynthetic pro... | 0.002        |
|         | GO:0005982 | starch metabolic process                    | 0.002        |
|         | GO:0042546 | cell wall biogenesis                        | 0.002        |
|         | GO:0009110 | vitamin biosynthetic process                | 0.002        |
|         | GO:0010206 | photosystem II repair                       | 0.002        |
|         | GO:0006720 | isoprenoid metabolic process                | 0.002        |
|         | GO:0006520 | cellular amino acid metabolic process       | 0.002        |

Continued on next page



| GO type | GO ID      | Description                                 | Adj. p-value |
|---------|------------|---------------------------------------------|--------------|
|         | GO:0009642 | response to light intensity                 | 0.002        |
|         | GO:0032787 | monocarboxylic acid metabolic process       | 0.002        |
|         | GO:0016109 | tetraterpenoid biosynthetic process         | 0.003        |
|         | GO:0016117 | carotenoid biosynthetic process             | 0.003        |
|         | GO:0034404 | nucleobase-containing small molecule bio... | 0.003        |
|         | GO:0010207 | photosystem II assembly                     | 0.003        |
|         | GO:0009832 | plant-type cell wall biogenesis             | 0.003        |
|         | GO:0044042 | glucan metabolic process                    | 0.003        |
|         | GO:0045037 | protein import into chloroplast stroma      | 0.003        |
|         | GO:0000272 | polysaccharide catabolic process            | 0.004        |
|         | GO:0044275 | cellular carbohydrate catabolic process     | 0.004        |
|         | GO:0044249 | cellular biosynthetic process               | 0.004        |
|         | GO:0044550 | secondary metabolite biosynthetic proces... | 0.004        |
|         | GO:2000652 | regulation of secondary cell wall biogen... | 0.005        |
|         | GO:0006073 | cellular glucan metabolic process           | 0.005        |
|         | GO:0009628 | response to abiotic stimulus                | 0.005        |
|         | GO:0035336 | long-chain fatty-acyl-CoA metabolic proc... | 0.006        |
|         | GO:0010114 | response to red light                       | 0.006        |
|         | GO:0017004 | cytochrome complex assembly                 | 0.007        |
|         | GO:0032259 | methylation                                 | 0.007        |
|         | GO:0016051 | carbohydrate biosynthetic process           | 0.009        |
|         | GO:0048235 | pollen sperm cell differentiation           | 0.009        |
|         | GO:0097237 | cellular response to toxic substance        | 0.009        |
|         | GO:0016122 | xanthophyll metabolic process               | 0.009        |
|         | GO:0010345 | suberin biosynthetic process                | 0.010        |
|         | GO:0046185 | aldehyde catabolic process                  | 0.010        |
|         | GO:0032544 | plastid translation                         | 0.011        |
|         | GO:0034599 | cellular response to oxidative stress       | 0.011        |
|         | GO:1990748 | cellular detoxification                     | 0.011        |
|         | GO:0009309 | amine biosynthetic process                  | 0.015        |
|         | GO:0042401 | cellular biogenic amine biosynthetic pro... | 0.015        |
|         | GO:0098869 | cellular oxidant detoxification             | 0.016        |
|         | GO:0045491 | xylan metabolic process                     | 0.017        |
|         | GO:0006743 | ubiquinone metabolic process                | 0.019        |
|         | GO:0006744 | ubiquinone biosynthetic process             | 0.019        |
|         | GO:0006399 | tRNA metabolic process                      | 0.019        |
|         | GO:0008152 | metabolic process                           | 0.021        |
|         | GO:0035337 | fatty-acyl-CoA metabolic process            | 0.021        |
|         | GO:1901576 | organic substance biosynthetic process      | 0.021        |
|         | GO:0006644 | phospholipid metabolic process              | 0.023        |
|         | GO:0009409 | response to cold                            | 0.023        |
|         | GO:0009664 | plant-type cell wall organization           | 0.023        |
|         | GO:0034637 | cellular carbohydrate biosynthetic proce... | 0.024        |
|         | GO:0000162 | tryptophan biosynthetic process             | 0.024        |
|         | GO:0046219 | indolalkylamine biosynthetic process        | 0.024        |
|         | GO:0043038 | amino acid activation                       | 0.024        |
|         | GO:0043039 | tRNA aminoacylation                         | 0.024        |
|         | GO:0006576 | cellular biogenic amine metabolic proces... | 0.025        |
|         | GO:0006783 | heme biosynthetic process                   | 0.026        |

Continued on next page

| GO type | GO ID      | Description                                 | Adj. p-value |
|---------|------------|---------------------------------------------|--------------|
|         | GO:0009438 | methylglyoxal metabolic process             | 0.026        |
|         | GO:0042182 | ketone catabolic process                    | 0.026        |
|         | GO:0051596 | methylglyoxal catabolic process             | 0.026        |
|         | GO:0044247 | cellular polysaccharide catabolic proces... | 0.028        |
|         | GO:1901135 | carbohydrate derivative metabolic proces... | 0.028        |
|         | GO:0009768 | photosynthesis, light harvesting in phot... | 0.029        |
|         | GO:0009793 | embryo development ending in seed dorman... | 0.029        |
|         | GO:0010383 | cell wall polysaccharide metabolic proce... | 0.031        |
|         | GO:1901607 | alpha-amino acid biosynthetic process       | 0.032        |
|         | GO:0006637 | acyl-CoA metabolic process                  | 0.035        |
|         | GO:0035383 | thioester metabolic process                 | 0.035        |
|         | GO:0006108 | malate metabolic process                    | 0.037        |
|         | GO:0044106 | cellular amine metabolic process            | 0.038        |
|         | GO:0061077 | chaperone-mediated protein folding          | 0.038        |
|         | GO:0009250 | glucan biosynthetic process                 | 0.039        |
|         | GO:0045489 | pectin biosynthetic process                 | 0.039        |
|         | GO:0071478 | cellular response to radiation              | 0.039        |
|         | GO:0033108 | mitochondrial respiratory chain complex ... | 0.040        |
|         | GO:0006089 | lactate metabolic process                   | 0.040        |
|         | GO:0019243 | methylglyoxal catabolic process to D-lac... | 0.040        |
|         | GO:0061727 | methylglyoxal catabolic process to lacta... | 0.040        |
|         | GO:0043572 | plastid fission                             | 0.042        |
|         | GO:1901615 | organic hydroxy compound metabolic proce... | 0.042        |
|         | GO:1901617 | organic hydroxy compound biosynthetic pr... | 0.042        |
|         | GO:0006119 | oxidative phosphorylation                   | 0.043        |
|         | GO:0042773 | ATP synthesis coupled electron transport    | 0.043        |
|         | GO:0005983 | starch catabolic process                    | 0.044        |
|         | GO:0046184 | aldehyde biosynthetic process               | 0.044        |
|         | GO:1901137 | carbohydrate derivative biosynthetic pro... | 0.044        |
|         | GO:0034614 | cellular response to reactive oxygen spe... | 0.046        |
|         | GO:0010103 | stomatal complex morphogenesis              | 0.046        |
|         | GO:0006721 | terpenoid metabolic process                 | 0.047        |
|         | GO:0006418 | tRNA aminoacylation for protein translat... | 0.049        |
|         | GO:1901605 | alpha-amino acid metabolic process          | 0.051        |
|         | GO:0009058 | biosynthetic process                        | 0.051        |
|         | GO:0009251 | glucan catabolic process                    | 0.051        |
|         | GO:1901568 | fatty acid derivative metabolic process     | 0.051        |
|         | GO:0042168 | heme metabolic process                      | 0.054        |
|         | GO:0051085 | chaperone cofactor-dependent protein ref... | 0.055        |
|         | GO:0016114 | terpenoid biosynthetic process              | 0.057        |
|         | GO:0030244 | cellulose biosynthetic process              | 0.058        |
|         | GO:0022904 | respiratory electron transport chain        | 0.059        |
|         | GO:0044036 | cell wall macromolecule metabolic proces... | 0.059        |
|         | GO:0010143 | cutin biosynthetic process                  | 0.061        |
|         | GO:0010020 | chloroplast fission                         | 0.063        |
|         | GO:0042435 | indole-containing compound biosynthetic ... | 0.066        |
|         | GO:0071214 | cellular response to abiotic stimulus       | 0.066        |
|         | GO:0104004 | cellular response to environmental stimu... | 0.066        |
|         | GO:0010410 | hemicellulose metabolic process             | 0.067        |

Continued on next page

| GO type | GO ID      | Description                                 | Adj. p-value |
|---------|------------|---------------------------------------------|--------------|
|         | GO:0009266 | response to temperature stimulus            | 0.070        |
|         | GO:0006694 | steroid biosynthetic process                | 0.070        |
|         | GO:0071482 | cellular response to light stimulus         | 0.071        |
|         | GO:0016126 | sterol biosynthetic process                 | 0.071        |
|         | GO:0042775 | mitochondrial ATP synthesis coupled elec... | 0.074        |
|         | GO:0009644 | response to high light intensity            | 0.074        |
|         | GO:0051261 | protein depolymerization                    | 0.076        |
|         | GO:0030243 | cellulose metabolic process                 | 0.076        |
|         | GO:0019430 | removal of superoxide radicals              | 0.077        |
|         | GO:0071450 | cellular response to oxygen radical         | 0.077        |
|         | GO:0071451 | cellular response to superoxide             | 0.077        |
|         | GO:0043244 | regulation of protein complex disassembl... | 0.084        |
|         | GO:0009308 | amine metabolic process                     | 0.085        |
|         | GO:1903338 | regulation of cell wall organization or ... | 0.086        |
|         | GO:0045492 | xylan biosynthetic process                  | 0.087        |
|         | GO:0009943 | adaxial/abaxial axis specification          | 0.093        |
|         | GO:0009944 | polarity specification of adaxial/abaxia... | 0.093        |
|         | GO:0019674 | NAD metabolic process                       | 0.097        |
|         | GO:0070592 | cell wall polysaccharide biosynthetic pr... | 0.097        |
|         | GO:0003006 | developmental process involved in reprod... | 0.098        |
|         | GO:0044038 | cell wall macromolecule biosynthetic pro... | 0.098        |
|         | GO:0070589 | cellular component macromolecule biosynt... | 0.098        |
|         | GO:0048481 | plant ovule development                     | 0.100        |
|         | GO:0031977 | thylakoid lumen                             | 0.000        |
|         | GO:0042170 | plastid membrane                            | 0.000        |
|         | GO:0031969 | chloroplast membrane                        | 0.000        |
|         | GO:0009523 | photosystem II                              | 0.000        |
|         | GO:0044429 | mitochondrial part                          | 0.000        |
|         | GO:1990204 | oxidoreductase complex                      | 0.000        |
|         | GO:0005875 | microtubule associated complex              | 0.000        |
|         | GO:0033176 | proton-transporting V-type ATPase comple... | 0.000        |
|         | GO:0005740 | mitochondrial envelope                      | 0.000        |
|         | GO:0009295 | nucleoid                                    | 0.000        |
|         | GO:0005743 | mitochondrial inner membrane                | 0.000        |
|         | GO:0009528 | plastid inner membrane                      | 0.000        |
|         | GO:0005874 | microtubule                                 | 0.000        |
|         | GO:0070469 | respiratory chain                           | 0.000        |
|         | GO:0044455 | mitochondrial membrane part                 | 0.001        |
|         | GO:0031225 | anchored component of membrane              | 0.001        |
|         | GO:0098803 | respiratory chain complex                   | 0.001        |
| CC      | GO:0046658 | anchored component of plasma membrane       | 0.001        |
|         | GO:0005746 | mitochondrial respiratory chain             | 0.002        |
|         | GO:0042644 | chloroplast nucleoid                        | 0.002        |
|         | GO:0010319 | stromule                                    | 0.002        |
|         | GO:0009654 | photosystem II oxygen evolving complex      | 0.003        |
|         | GO:0016020 | membrane                                    | 0.005        |
|         | GO:0009522 | photosystem I                               | 0.006        |
|         | GO:0005618 | cell wall                                   | 0.008        |
|         | GO:0030312 | external encapsulating structure            | 0.008        |

Continued on next page

| GO type | GO ID      | Description                                 | Adj. p-value |
|---------|------------|---------------------------------------------|--------------|
|         | GO:0030964 | NADH dehydrogenase complex                  | 0.009        |
|         | GO:0045271 | respiratory chain complex I                 | 0.009        |
|         | GO:0098798 | mitochondrial protein complex               | 0.012        |
|         | GO:0005753 | mitochondrial proton-transporting ATP sy... | 0.012        |
|         | GO:0005747 | mitochondrial respiratory chain complex ... | 0.013        |
|         | GO:0098796 | membrane protein complex                    | 0.019        |
|         | GO:0009527 | plastid outer membrane                      | 0.028        |
|         | GO:0009707 | chloroplast outer membrane                  | 0.028        |
|         | GO:0019898 | extrinsic component of membrane             | 0.085        |
|         | GO:0016787 | hydrolase activity                          | 0.000        |
|         | GO:0016491 | oxidoreductase activity                     | 0.000        |
|         | GO:0016788 | hydrolase activity, acting on ester bond... | 0.000        |
|         | GO:0016829 | lyase activity                              | 0.000        |
|         | GO:0042578 | phosphoric ester hydrolase activity         | 0.000        |
|         | GO:0016791 | phosphatase activity                        | 0.000        |
|         | GO:0016741 | transferase activity, transferring one-c... | 0.000        |
|         | GO:0003777 | microtubule motor activity                  | 0.000        |
|         | GO:0008168 | methyltransferase activity                  | 0.000        |
|         | GO:0016655 | oxidoreductase activity, acting on NAD(P... | 0.000        |
|         | GO:0050662 | coenzyme binding                            | 0.000        |
|         | GO:0003954 | NADH dehydrogenase activity                 | 0.001        |
|         | GO:0016620 | oxidoreductase activity, acting on the a... | 0.001        |
|         | GO:0016798 | hydrolase activity, acting on glycosyl b... | 0.001        |
|         | GO:0016747 | transferase activity, transferring acyl ... | 0.002        |
|         | GO:0051087 | chaperone binding                           | 0.003        |
|         | GO:0009055 | electron transfer activity                  | 0.004        |
|         | GO:0140101 | catalytic activity, acting on a tRNA        | 0.004        |
|         | GO:0016413 | O-acetyltransferase activity                | 0.004        |
|         | GO:0016853 | isomerase activity                          | 0.004        |
|         | GO:0016746 | transferase activity, transferring acyl ... | 0.004        |
|         | GO:0000287 | magnesium ion binding                       | 0.004        |
|         | GO:0016790 | thiolester hydrolase activity               | 0.004        |
|         | GO:0019205 | nucleobase-containing compound kinase ac... | 0.004        |
|         | GO:0044769 | ATPase activity, coupled to transmembran... | 0.004        |
|         | GO:0046961 | proton-transporting ATPase activity, rot... | 0.004        |
|         | GO:0004553 | hydrolase activity, hydrolyzing O-glycos... | 0.004        |
|         | GO:0016209 | antioxidant activity                        | 0.004        |
|         | GO:0016776 | phosphotransferase activity, phosphate g... | 0.004        |
|         | GO:0016903 | oxidoreductase activity, acting on the a... | 0.004        |
|         | GO:0080019 | fatty-acyl-CoA reductase (alcohol-formin... | 0.006        |
|         | GO:0008374 | O-acyltransferase activity                  | 0.007        |
|         | GO:0016778 | diphosphotransferase activity               | 0.007        |
|         | GO:0016866 | intramolecular transferase activity         | 0.010        |
|         | GO:0140097 | catalytic activity, acting on DNA           | 0.010        |
|         | GO:0008137 | NADH dehydrogenase (ubiquinone) activity    | 0.011        |
|         | GO:0008757 | S-adenosylmethionine-dependent methyltra... | 0.011        |
| MF      | GO:0050136 | NADH dehydrogenase (quinone) activity       | 0.011        |
|         | GO:2001070 | starch binding                              | 0.012        |
|         | GO:0036442 | proton-exporting ATPase activity            | 0.012        |

Continued on next page

| GO type | GO ID      | Description                                 | Adj. p-value |
|---------|------------|---------------------------------------------|--------------|
|         | GO:0016830 | carbon-carbon lyase activity                | 0.013        |
|         | GO:0004252 | serine-type endopeptidase activity          | 0.013        |
|         | GO:0008236 | serine-type peptidase activity              | 0.013        |
|         | GO:0016614 | oxidoreductase activity, acting on CH-OH... | 0.013        |
|         | GO:0016887 | ATPase activity                             | 0.013        |
|         | GO:0017171 | serine hydrolase activity                   | 0.013        |
|         | GO:0016407 | acetyltransferase activity                  | 0.017        |
|         | GO:0016168 | chlorophyll binding                         | 0.018        |
|         | GO:0016759 | cellulose synthase activity                 | 0.018        |
|         | GO:0016760 | cellulose synthase (UDP-forming) activit... | 0.018        |
|         | GO:0016840 | carbon-nitrogen lyase activity              | 0.021        |
|         | GO:0033764 | steroid dehydrogenase activity, acting o... | 0.021        |
|         | GO:0016774 | phosphotransferase activity, carboxyl gr... | 0.038        |
|         | GO:0016462 | pyrophosphatase activity                    | 0.039        |
|         | GO:0017111 | nucleoside-triphosphatase activity          | 0.043        |
|         | GO:0016874 | ligase activity                             | 0.043        |
|         | GO:0016615 | malate dehydrogenase activity               | 0.044        |
|         | GO:0003854 | 3-beta-hydroxy-delta5-steroid dehydrogen... | 0.044        |
|         | GO:0016229 | steroid dehydrogenase activity              | 0.045        |
|         | GO:0004812 | aminoacyl-tRNA ligase activity              | 0.046        |
|         | GO:0016875 | ligase activity, forming carbon-oxygen b... | 0.046        |
|         | GO:0050660 | flavin adenine dinucleotide binding         | 0.046        |
|         | GO:0004721 | phosphoprotein phosphatase activity         | 0.047        |
|         | GO:0016817 | hydrolase activity, acting on acid anhyd... | 0.055        |
|         | GO:0016762 | xyloglucan:xyloglucosyl transferase acti... | 0.055        |
|         | GO:0016818 | hydrolase activity, acting on acid anhyd... | 0.055        |
|         | GO:0050661 | NADP binding                                | 0.062        |
|         | GO:0016838 | carbon-oxygen lyase activity, acting on ... | 0.064        |
|         | GO:0016616 | oxidoreductase activity, acting on the C... | 0.073        |
|         | GO:0050308 | sugar-phosphatase activity                  | 0.073        |
|         | GO:0019238 | cyclohydrolase activity                     | 0.081        |
|         | GO:0016861 | intramolecular oxidoreductase activity, ... | 0.084        |
|         | GO:0019203 | carbohydrate phosphatase activity           | 0.099        |
|         | GO:0042349 | guiding stereospecific synthesis activit... | 0.099        |
|         | GO:0051015 | actin filament binding                      | 0.099        |

4.1.16 Leaf - Preflowering - Cluster 16

| GO type | GO ID      | Description                                 | Adj. p-value |
|---------|------------|---------------------------------------------|--------------|
| BP      | GO:1903506 | regulation of nucleic acid-templated tra... | 0.000        |
|         | GO:2001141 | regulation of RNA biosynthetic process      | 0.000        |
|         | GO:0051252 | regulation of RNA metabolic process         | 0.000        |
|         | GO:0042493 | response to drug                            | 0.004        |
|         | GO:0009404 | toxin metabolic process                     | 0.004        |
|         | GO:0043207 | response to external biotic stimulus        | 0.004        |
|         | GO:0051707 | response to other organism                  | 0.004        |
|         | GO:0009607 | response to biotic stimulus                 | 0.004        |
|         | GO:0051704 | multi-organism process                      | 0.005        |
|         | GO:0044267 | cellular protein metabolic process          | 0.008        |
|         | GO:0050832 | defense response to fungus                  | 0.008        |
|         | GO:0050896 | response to stimulus                        | 0.009        |
|         | GO:0071229 | cellular response to acid chemical          | 0.011        |
|         | GO:0019538 | protein metabolic process                   | 0.011        |
|         | GO:0098542 | defense response to other organism          | 0.017        |
|         | GO:0006887 | exocytosis                                  | 0.023        |
|         | GO:0023014 | signal transduction by protein phosphory... | 0.023        |
|         | GO:0032940 | secretion by cell                           | 0.023        |
|         | GO:1901700 | response to oxygen-containing compound      | 0.023        |
|         | GO:0051716 | cellular response to stimulus               | 0.023        |
|         | GO:0031347 | regulation of defense response              | 0.026        |
|         | GO:0046903 | secretion                                   | 0.028        |
|         | GO:0001101 | response to acid chemical                   | 0.031        |
|         | GO:1901698 | response to nitrogen compound               | 0.032        |
|         | GO:0070887 | cellular response to chemical stimulus      | 0.046        |
|         | GO:0006950 | response to stress                          | 0.052        |
|         | GO:0042737 | drug catabolic process                      | 0.052        |
|         | GO:0048523 | negative regulation of cellular process     | 0.056        |
|         | GO:0009605 | response to external stimulus               | 0.057        |
|         | GO:0042221 | response to chemical                        | 0.060        |
|         | GO:1902531 | regulation of intracellular signal trans... | 0.061        |
|         | GO:0010941 | regulation of cell death                    | 0.072        |
|         | GO:0009863 | salicylic acid mediated signaling pathwa... | 0.080        |
|         | GO:0071446 | cellular response to salicylic acid stim... | 0.084        |
| CC      | GO:0005911 | cell-cell junction                          | 0.005        |
|         | GO:0030054 | cell junction                               | 0.005        |
|         | GO:0009506 | plasmodesma                                 | 0.005        |
|         | GO:0055044 | symplast                                    | 0.005        |
|         | GO:0000145 | exocyst                                     | 0.013        |
|         | GO:0099023 | tethering complex                           | 0.023        |
|         | GO:0030135 | coated vesicle                              | 0.066        |
| MF      | GO:0016757 | transferase activity, transferring glyco... | 0.000        |
|         | GO:0003677 | DNA binding                                 | 0.000        |
|         | GO:0016758 | transferase activity, transferring hexos... | 0.000        |
|         | GO:0030246 | carbohydrate binding                        | 0.000        |
|         | GO:0008194 | UDP-glycosyltransferase activity            | 0.001        |

Continued on next page

---

| GO type | GO ID      | Description                          | Adj. p-value |
|---------|------------|--------------------------------------|--------------|
|         | GO:0046527 | glucosyltransferase activity         | 0.001        |
|         | GO:0004871 | signal transducer activity           | 0.005        |
|         | GO:0001871 | pattern binding                      | 0.028        |
|         | GO:0030247 | polysaccharide binding               | 0.028        |
|         | GO:0004190 | aspartic-type endopeptidase activity | 0.039        |
|         | GO:0070001 | aspartic-type peptidase activity     | 0.039        |
|         | GO:0051213 | dioxygenase activity                 | 0.040        |

---

#### 4.1.17 Leaf - Preflowering - Cluster 17

| GO type | GO ID      | Description                                 | Adj. p-value |
|---------|------------|---------------------------------------------|--------------|
|         | GO:0003333 | amino acid transmembrane transport          | 0.002        |
|         | GO:1904659 | glucose transmembrane transport             | 0.006        |
|         | GO:1903825 | organic acid transmembrane transport        | 0.006        |
|         | GO:0006022 | aminoglycan metabolic process               | 0.008        |
|         | GO:1905039 | carboxylic acid transmembrane transport     | 0.009        |
|         | GO:0046323 | glucose import                              | 0.010        |
|         | GO:0008645 | hexose transmembrane transport              | 0.010        |
|         | GO:0006836 | neurotransmitter transport                  | 0.010        |
|         | GO:0015749 | monosaccharide transmembrane transport      | 0.011        |
|         | GO:0009875 | pollen-pistil interaction                   | 0.021        |
|         | GO:0006040 | amino sugar metabolic process               | 0.024        |
|         | GO:0015807 | L-amino acid transport                      | 0.024        |
|         | GO:0042493 | response to drug                            | 0.024        |
|         | GO:0007166 | cell surface receptor signaling pathway     | 0.024        |
|         | GO:0015849 | organic acid transport                      | 0.025        |
|         | GO:0015804 | neutral amino acid transport                | 0.025        |
|         | GO:0098754 | detoxification                              | 0.028        |
|         | GO:0008037 | cell recognition                            | 0.029        |
|         | GO:0008643 | carbohydrate transport                      | 0.029        |
|         | GO:0046942 | carboxylic acid transport                   | 0.032        |
|         | GO:0048544 | recognition of pollen                       | 0.033        |
|         | GO:1902475 | L-alpha-amino acid transmembrane transpo... | 0.035        |
|         | GO:0010466 | negative regulation of peptidase activit... | 0.038        |
|         | GO:0010951 | negative regulation of endopeptidase act... | 0.038        |
|         | GO:0052547 | regulation of peptidase activity            | 0.038        |
|         | GO:0052548 | regulation of endopeptidase activity        | 0.038        |
| BP      | GO:0006855 | drug transmembrane transport                | 0.038        |
|         | GO:0009607 | response to biotic stimulus                 | 0.038        |
|         | GO:0006820 | anion transport                             | 0.039        |
|         | GO:0006665 | sphingolipid metabolic process              | 0.039        |
|         | GO:1901136 | carbohydrate derivative catabolic proces... | 0.041        |
|         | GO:0019748 | secondary metabolic process                 | 0.043        |
|         | GO:0015706 | nitrate transport                           | 0.048        |
|         | GO:0034219 | carbohydrate transmembrane transport        | 0.049        |
|         | GO:0006796 | phosphate-containing compound metabolic ... | 0.056        |
|         | GO:0015850 | organic hydroxy compound transport          | 0.056        |
|         | GO:0015893 | drug transport                              | 0.058        |
|         | GO:0098542 | defense response to other organism          | 0.066        |
|         | GO:0006793 | phosphorus metabolic process                | 0.073        |
|         | GO:0042737 | drug catabolic process                      | 0.080        |
|         | GO:0008361 | regulation of cell size                     | 0.083        |
|         | GO:0031348 | negative regulation of defense response     | 0.083        |
|         | GO:0043207 | response to external biotic stimulus        | 0.087        |
|         | GO:0051707 | response to other organism                  | 0.087        |
|         | GO:0045861 | negative regulation of proteolysis          | 0.088        |
|         | GO:0005975 | carbohydrate metabolic process              | 0.090        |

Continued on next page



| GO type | GO ID      | Description                                 | Adj. p-value |
|---------|------------|---------------------------------------------|--------------|
|         | GO:0009617 | response to bacterium                       | 0.098        |
|         | GO:0015791 | polyol transport                            | 0.098        |
|         | GO:0006749 | glutathione metabolic process               | 0.098        |
|         | GO:0006833 | water transport                             | 0.098        |
|         | GO:0042044 | fluid transport                             | 0.098        |
|         | GO:0098656 | anion transmembrane transport               | 0.098        |
|         | GO:0009814 | defense response, incompatible interacti... | 0.099        |
| CC      | GO:0071944 | cell periphery                              | 0.000        |
|         | GO:0005773 | vacuole                                     | 0.005        |
|         | GO:0005215 | transporter activity                        | 0.000        |
|         | GO:0016705 | oxidoreductase activity, acting on paire... | 0.000        |
|         | GO:0003824 | catalytic activity                          | 0.000        |
|         | GO:0004497 | monooxygenase activity                      | 0.000        |
|         | GO:0030246 | carbohydrate binding                        | 0.000        |
|         | GO:0015171 | amino acid transmembrane transporter act... | 0.000        |
|         | GO:0005355 | glucose transmembrane transporter activi... | 0.002        |
|         | GO:0015144 | carbohydrate transmembrane transporter a... | 0.002        |
|         | GO:0015293 | symporter activity                          | 0.002        |
|         | GO:0046527 | glucosyltransferase activity                | 0.002        |
|         | GO:0005326 | neurotransmitter transporter activity       | 0.002        |
|         | GO:0005524 | ATP binding                                 | 0.002        |
|         | GO:0043168 | anion binding                               | 0.002        |
|         | GO:0030414 | peptidase inhibitor activity                | 0.002        |
|         | GO:0061134 | peptidase regulator activity                | 0.002        |
|         | GO:0015294 | solute:cation symporter activity            | 0.003        |
|         | GO:0016758 | transferase activity, transferring hexos... | 0.003        |
|         | GO:0015149 | hexose transmembrane transporter activit... | 0.003        |
|         | GO:0015145 | monosaccharide transmembrane transporter... | 0.003        |
|         | GO:0004866 | endopeptidase inhibitor activity            | 0.004        |
|         | GO:0005342 | organic acid transmembrane transporter a... | 0.004        |
|         | GO:0061135 | endopeptidase regulator activity            | 0.004        |
|         | GO:0015179 | L-amino acid transmembrane transporter a... | 0.004        |
|         | GO:0022804 | active transmembrane transporter activit... | 0.005        |
|         | GO:0046943 | carboxylic acid transmembrane transporte... | 0.006        |
|         | GO:0008194 | UDP-glycosyltransferase activity            | 0.007        |
|         | GO:0008514 | organic anion transmembrane transporter ... | 0.007        |
|         | GO:0035639 | purine ribonucleoside triphosphate bindi... | 0.007        |
|         | GO:0015297 | antiporter activity                         | 0.008        |
|         | GO:0051119 | sugar transmembrane transporter activity    | 0.008        |
|         | GO:0015295 | solute:proton symporter activity            | 0.008        |
|         | GO:0016757 | transferase activity, transferring glyco... | 0.010        |
|         | GO:0043167 | ion binding                                 | 0.010        |
|         | GO:1901618 | organic hydroxy compound transmembrane t... | 0.010        |
|         | GO:0008324 | cation transmembrane transporter activit... | 0.012        |
| MF      | GO:0004871 | signal transducer activity                  | 0.013        |
|         | GO:0005351 | carbohydrate:proton symporter activity      | 0.013        |
|         | GO:0005402 | carbohydrate:cation symporter activity      | 0.013        |
|         | GO:0004364 | glutathione transferase activity            | 0.013        |
|         | GO:0004857 | enzyme inhibitor activity                   | 0.016        |

Continued on next page

| GO type | GO ID      | Description                                 | Adj. p-value |
|---------|------------|---------------------------------------------|--------------|
|         | GO:0051213 | dioxygenase activity                        | 0.017        |
|         | GO:0015168 | glycerol transmembrane transporter activ... | 0.018        |
|         | GO:0004553 | hydrolase activity, hydrolyzing O-glycos... | 0.020        |
|         | GO:0008483 | transaminase activity                       | 0.020        |
|         | GO:0016769 | transferase activity, transferring nitro... | 0.020        |
|         | GO:0015174 | basic amino acid transmembrane transport... | 0.023        |
|         | GO:0015166 | polyol transmembrane transporter activit... | 0.025        |
|         | GO:0038023 | signaling receptor activity                 | 0.026        |
|         | GO:0060089 | molecular transducer activity               | 0.026        |
|         | GO:0005310 | dicarboxylic acid transmembrane transpor... | 0.030        |
|         | GO:0016491 | oxidoreductase activity                     | 0.030        |
|         | GO:0004867 | serine-type endopeptidase inhibitor acti... | 0.032        |
|         | GO:0005372 | water transmembrane transporter activity    | 0.033        |
|         | GO:0015250 | water channel activity                      | 0.033        |
|         | GO:0015254 | glycerol channel activity                   | 0.033        |
|         | GO:0046983 | protein dimerization activity               | 0.034        |
|         | GO:0015238 | drug transmembrane transporter activity     | 0.038        |
|         | GO:0000166 | nucleotide binding                          | 0.043        |
|         | GO:0016798 | hydrolase activity, acting on glycosyl b... | 0.043        |
|         | GO:1901265 | nucleoside phosphate binding                | 0.043        |
|         | GO:0036094 | small molecule binding                      | 0.045        |
|         | GO:0004970 | ionotropic glutamate receptor activity      | 0.047        |
|         | GO:0005230 | extracellular ligand-gated ion channel a... | 0.047        |
|         | GO:0008066 | glutamate receptor activity                 | 0.047        |
|         | GO:0022824 | transmitter-gated ion channel activity      | 0.047        |
|         | GO:0022835 | transmitter-gated channel activity          | 0.047        |
|         | GO:0015175 | neutral amino acid transmembrane transpo... | 0.055        |
|         | GO:0022890 | inorganic cation transmembrane transport... | 0.074        |
|         | GO:0004888 | transmembrane signaling receptor activit... | 0.077        |
|         | GO:0003959 | NADPH dehydrogenase activity                | 0.079        |
|         | GO:0030594 | neurotransmitter receptor activity          | 0.085        |
|         | GO:0005102 | signaling receptor binding                  | 0.093        |

#### 4.1.18 Leaf - Preflowering - Cluster 18

| GO type | GO ID      | Description                                 | Adj. p-value |
|---------|------------|---------------------------------------------|--------------|
|         | GO:0071702 | organic substance transport                 | 0.000        |
|         | GO:0046323 | glucose import                              | 0.004        |
|         | GO:0042493 | response to drug                            | 0.005        |
|         | GO:0071705 | nitrogen compound transport                 | 0.005        |
|         | GO:0006833 | water transport                             | 0.005        |
|         | GO:0042044 | fluid transport                             | 0.005        |
|         | GO:0006575 | cellular modified amino acid metabolic p... | 0.007        |
|         | GO:0030104 | water homeostasis                           | 0.007        |
|         | GO:0005996 | monosaccharide metabolic process            | 0.007        |
|         | GO:0006836 | neurotransmitter transport                  | 0.009        |
|         | GO:0006026 | aminoglycan catabolic process               | 0.013        |
|         | GO:0006030 | chitin metabolic process                    | 0.013        |
|         | GO:0006032 | chitin catabolic process                    | 0.013        |
|         | GO:0008643 | carbohydrate transport                      | 0.013        |
|         | GO:0044550 | secondary metabolite biosynthetic proces... | 0.013        |
|         | GO:0046348 | amino sugar catabolic process               | 0.013        |
|         | GO:1901071 | glucosamine-containing compound metaboli... | 0.013        |
|         | GO:1901072 | glucosamine-containing compound cataboli... | 0.013        |
| BP      | GO:0051179 | localization                                | 0.015        |
|         | GO:0006952 | defense response                            | 0.016        |
|         | GO:0006022 | aminoglycan metabolic process               | 0.018        |
|         | GO:0051234 | establishment of localization               | 0.018        |
|         | GO:0006810 | transport                                   | 0.019        |
|         | GO:0015807 | L-amino acid transport                      | 0.024        |
|         | GO:0055114 | oxidation-reduction process                 | 0.025        |
|         | GO:0006040 | amino sugar metabolic process               | 0.035        |
|         | GO:0015804 | neutral amino acid transport                | 0.035        |
|         | GO:0006855 | drug transmembrane transport                | 0.045        |
|         | GO:0044248 | cellular catabolic process                  | 0.045        |
|         | GO:0006665 | sphingolipid metabolic process              | 0.053        |
|         | GO:1902475 | L-alpha-amino acid transmembrane transpo... | 0.055        |
|         | GO:0015893 | drug transport                              | 0.064        |
|         | GO:0010243 | response to organonitrogen compound         | 0.089        |
|         | GO:0046149 | pigment catabolic process                   | 0.091        |
|         | GO:0072523 | purine-containing compound catabolic pro... | 0.091        |
|         | GO:0006468 | protein phosphorylation                     | 0.093        |
|         | GO:0034219 | carbohydrate transmembrane transport        | 0.093        |
|         | GO:0005886 | plasma membrane                             | 0.000        |
|         | GO:0005773 | vacuole                                     | 0.001        |
|         | GO:0044459 | plasma membrane part                        | 0.001        |
|         | GO:0098805 | whole membrane                              | 0.002        |
|         | GO:0030118 | clathrin coat                               | 0.006        |
|         | GO:0071944 | cell periphery                              | 0.006        |
|         | GO:0031226 | intrinsic component of plasma membrane      | 0.010        |
| CC      | GO:0099023 | tethering complex                           | 0.010        |
|         | GO:0030120 | vesicle coat                                | 0.010        |

Continued on next page

| GO type | GO ID      | Description                                 | Adj. p-value |
|---------|------------|---------------------------------------------|--------------|
|         | GO:0044433 | cytoplasmic vesicle part                    | 0.035        |
|         | GO:0098797 | plasma membrane protein complex             | 0.056        |
|         | GO:0005852 | eukaryotic translation initiation factor... | 0.058        |
|         | GO:0017119 | Golgi transport complex                     | 0.073        |
|         | GO:0005777 | peroxisome                                  | 0.090        |
|         | GO:0042579 | microbody                                   | 0.090        |
|         | GO:0004497 | monooxygenase activity                      | 0.000        |
|         | GO:0016705 | oxidoreductase activity, acting on paire... | 0.000        |
|         | GO:1901618 | organic hydroxy compound transmembrane t... | 0.000        |
|         | GO:0005355 | glucose transmembrane transporter activi... | 0.002        |
|         | GO:0015145 | monosaccharide transmembrane transporter... | 0.003        |
|         | GO:0015293 | symporter activity                          | 0.003        |
|         | GO:0015149 | hexose transmembrane transporter activit... | 0.003        |
|         | GO:0030246 | carbohydrate binding                        | 0.003        |
|         | GO:0015144 | carbohydrate transmembrane transporter a... | 0.003        |
|         | GO:0016491 | oxidoreductase activity                     | 0.004        |
|         | GO:0015294 | solute:cation symporter activity            | 0.004        |
|         | GO:0005326 | neurotransmitter transporter activity       | 0.004        |
|         | GO:0015174 | basic amino acid transmembrane transport... | 0.004        |
|         | GO:0008483 | transaminase activity                       | 0.005        |
|         | GO:0016769 | transferase activity, transferring nitro... | 0.005        |
|         | GO:0015291 | secondary active transmembrane transport... | 0.007        |
|         | GO:0004568 | chitinase activity                          | 0.008        |
|         | GO:0042562 | hormone binding                             | 0.009        |
|         | GO:0015179 | L-amino acid transmembrane transporter a... | 0.010        |
|         | GO:0051213 | dioxygenase activity                        | 0.013        |
| MF      | GO:0004672 | protein kinase activity                     | 0.014        |
|         | GO:0005351 | carbohydrate:proton symporter activity      | 0.016        |
|         | GO:0005402 | carbohydrate:cation symporter activity      | 0.016        |
|         | GO:0015295 | solute:proton symporter activity            | 0.016        |
|         | GO:0046914 | transition metal ion binding                | 0.018        |
|         | GO:0005215 | transporter activity                        | 0.031        |
|         | GO:0051119 | sugar transmembrane transporter activity    | 0.031        |
|         | GO:0004857 | enzyme inhibitor activity                   | 0.034        |
|         | GO:0016757 | transferase activity, transferring glyco... | 0.045        |
|         | GO:0016765 | transferase activity, transferring alkyl... | 0.046        |
|         | GO:0019840 | isoprenoid binding                          | 0.047        |
|         | GO:0035673 | oligopeptide transmembrane transporter a... | 0.057        |
|         | GO:0010427 | abscisic acid binding                       | 0.067        |
|         | GO:0004866 | endopeptidase inhibitor activity            | 0.073        |
|         | GO:0061135 | endopeptidase regulator activity            | 0.073        |
|         | GO:0016773 | phosphotransferase activity, alcohol gro... | 0.081        |
|         | GO:0015175 | neutral amino acid transmembrane transpo... | 0.083        |
|         | GO:0022857 | transmembrane transporter activity          | 0.083        |
|         | GO:0030414 | peptidase inhibitor activity                | 0.083        |
|         | GO:0061134 | peptidase regulator activity                | 0.083        |
|         | GO:0015171 | amino acid transmembrane transporter act... | 0.089        |
|         | GO:0004867 | serine-type endopeptidase inhibitor acti... | 0.094        |

#### 4.1.19 Leaf - Preflowering - Cluster 19

| GO type | GO ID      | Description                                 | Adj. p-value |
|---------|------------|---------------------------------------------|--------------|
| BP      | GO:0044085 | cellular component biogenesis               | 0.000        |
|         | GO:0034660 | ncRNA metabolic process                     | 0.000        |
|         | GO:0022607 | cellular component assembly                 | 0.000        |
|         | GO:0034470 | ncRNA processing                            | 0.000        |
|         | GO:0009451 | RNA modification                            | 0.002        |
|         | GO:0006399 | tRNA metabolic process                      | 0.003        |
|         | GO:0008152 | metabolic process                           | 0.009        |
|         | GO:0006396 | RNA processing                              | 0.055        |
|         | GO:0001510 | RNA methylation                             | 0.084        |
| CC      | GO:1902494 | catalytic complex                           | 0.009        |
|         | GO:0031090 | organelle membrane                          | 0.010        |
|         | GO:0046658 | anchored component of plasma membrane       | 0.019        |
|         | GO:0031225 | anchored component of membrane              | 0.019        |
|         | GO:0005576 | extracellular region                        | 0.068        |
| MF      | GO:0016787 | hydrolase activity                          | 0.000        |
|         | GO:0016798 | hydrolase activity, acting on glycosyl b... | 0.021        |
|         | GO:0008173 | RNA methyltransferase activity              | 0.034        |
|         | GO:0140098 | catalytic activity, acting on RNA           | 0.034        |
|         | GO:0016741 | transferase activity, transferring one-c... | 0.034        |
|         | GO:0004553 | hydrolase activity, hydrolyzing O-glycos... | 0.051        |

#### 4.1.20 Leaf - Preflowering - Cluster 20

| GO type | GO ID      | Description                                 | Adj. p-value |
|---------|------------|---------------------------------------------|--------------|
|         | GO:0032259 | methylation                                 | 0.000        |
|         | GO:0051276 | chromosome organization                     | 0.000        |
|         | GO:0043414 | macromolecule methylation                   | 0.000        |
|         | GO:0006091 | generation of precursor metabolites and ... | 0.001        |
|         | GO:0018205 | peptidyl-lysine modification                | 0.002        |
|         | GO:0006325 | chromatin organization                      | 0.003        |
|         | GO:0016570 | histone modification                        | 0.009        |
|         | GO:0019637 | organophosphate metabolic process           | 0.010        |
|         | GO:0048235 | pollen sperm cell differentiation           | 0.010        |
|         | GO:0016569 | covalent chromatin modification             | 0.010        |
|         | GO:0019438 | aromatic compound biosynthetic process      | 0.010        |
|         | GO:0006479 | protein methylation                         | 0.011        |
|         | GO:0008213 | protein alkylation                          | 0.011        |
|         | GO:0018193 | peptidyl-amino acid modification            | 0.011        |
|         | GO:0009699 | phenylpropanoid biosynthetic process        | 0.015        |
|         | GO:0009123 | nucleoside monophosphate metabolic proce... | 0.016        |
|         | GO:1901568 | fatty acid derivative metabolic process     | 0.017        |
|         | GO:0018022 | peptidyl-lysine methylation                 | 0.018        |
|         | GO:0016571 | histone methylation                         | 0.020        |
|         | GO:0006694 | steroid biosynthetic process                | 0.021        |
|         | GO:0009150 | purine ribonucleotide metabolic process     | 0.021        |
|         | GO:1901362 | organic cyclic compound biosynthetic pro... | 0.021        |
|         | GO:0006163 | purine nucleotide metabolic process         | 0.022        |
|         | GO:0051188 | cofactor biosynthetic process               | 0.023        |
|         | GO:0048869 | cellular developmental process              | 0.030        |
|         | GO:0009126 | purine nucleoside monophosphate metaboli... | 0.032        |
|         | GO:0009161 | ribonucleoside monophosphate metabolic p... | 0.032        |
|         | GO:0009167 | purine ribonucleoside monophosphate meta... | 0.032        |
| BP      | GO:0030154 | cell differentiation                        | 0.032        |
|         | GO:0035336 | long-chain fatty-acyl-CoA metabolic proc... | 0.034        |
|         | GO:0071555 | cell wall organization                      | 0.034        |
|         | GO:0046034 | ATP metabolic process                       | 0.038        |
|         | GO:0009259 | ribonucleotide metabolic process            | 0.039        |
|         | GO:0090407 | organophosphate biosynthetic process        | 0.039        |
|         | GO:0009144 | purine nucleoside triphosphate metabolic... | 0.040        |
|         | GO:0009205 | purine ribonucleoside triphosphate metab... | 0.040        |
|         | GO:0072330 | monocarboxylic acid biosynthetic process    | 0.050        |
|         | GO:0044283 | small molecule biosynthetic process         | 0.051        |
|         | GO:0009199 | ribonucleoside triphosphate metabolic pr... | 0.054        |
|         | GO:0016052 | carbohydrate catabolic process              | 0.056        |
|         | GO:0009409 | response to cold                            | 0.059        |
|         | GO:0055114 | oxidation-reduction process                 | 0.069        |
|         | GO:0006629 | lipid metabolic process                     | 0.073        |
|         | GO:0016053 | organic acid biosynthetic process           | 0.073        |
|         | GO:0045229 | external encapsulating structure organiz... | 0.073        |
|         | GO:0046394 | carboxylic acid biosynthetic process        | 0.073        |

Continued on next page

| GO type | GO ID      | Description                                 | Adj. p-value |
|---------|------------|---------------------------------------------|--------------|
|         | GO:0006637 | acyl-CoA metabolic process                  | 0.073        |
|         | GO:0035383 | thioester metabolic process                 | 0.073        |
|         | GO:0035337 | fatty-acyl-CoA metabolic process            | 0.079        |
|         | GO:0006164 | purine nucleotide biosynthetic process      | 0.092        |
|         | GO:0034968 | histone lysine methylation                  | 0.093        |
|         | GO:0008202 | steroid metabolic process                   | 0.094        |
|         | GO:0019359 | nicotinamide nucleotide biosynthetic pro... | 0.097        |
|         | GO:0009152 | purine ribonucleotide biosynthetic proce... | 0.099        |
|         | GO:0009698 | phenylpropanoid metabolic process           | 0.099        |
|         | GO:0046434 | organophosphate catabolic process           | 0.099        |
|         | GO:0009579 | thylakoid                                   | 0.000        |
|         | GO:0009534 | chloroplast thylakoid                       | 0.000        |
|         | GO:0031976 | plastid thylakoid                           | 0.000        |
|         | GO:0005874 | microtubule                                 | 0.001        |
|         | GO:0099080 | supramolecular complex                      | 0.003        |
|         | GO:0099081 | supramolecular polymer                      | 0.003        |
|         | GO:0099512 | supramolecular fiber                        | 0.003        |
|         | GO:0099513 | polymeric cytoskeletal fiber                | 0.003        |
| CC      | GO:0005694 | chromosome                                  | 0.006        |
|         | GO:0015630 | microtubule cytoskeleton                    | 0.007        |
|         | GO:0005881 | cytoplasmic microtubule                     | 0.008        |
|         | GO:0005634 | nucleus                                     | 0.013        |
|         | GO:0055028 | cortical microtubule                        | 0.025        |
|         | GO:0030863 | cortical cytoskeleton                       | 0.039        |
|         | GO:0030981 | cortical microtubule cytoskeleton           | 0.039        |
|         | GO:0005856 | cytoskeleton                                | 0.071        |
|         | GO:0044430 | cytoskeletal part                           | 0.071        |
|         | GO:0005739 | mitochondrion                               | 0.092        |
|         | GO:0003824 | catalytic activity                          | 0.001        |
|         | GO:0008757 | S-adenosylmethionine-dependent methyltra... | 0.001        |
|         | GO:0008276 | protein methyltransferase activity          | 0.006        |
|         | GO:0016278 | lysine N-methyltransferase activity         | 0.007        |
|         | GO:0016279 | protein-lysine N-methyltransferase activ... | 0.007        |
|         | GO:0016620 | oxidoreductase activity, acting on the a... | 0.011        |
|         | GO:0008170 | N-methyltransferase activity                | 0.014        |
|         | GO:0140098 | catalytic activity, acting on RNA           | 0.021        |
| MF      | GO:0042054 | histone methyltransferase activity          | 0.021        |
|         | GO:0016903 | oxidoreductase activity, acting on the a... | 0.025        |
|         | GO:0042393 | histone binding                             | 0.038        |
|         | GO:0016788 | hydrolase activity, acting on ester bond... | 0.040        |
|         | GO:0016787 | hydrolase activity                          | 0.052        |
|         | GO:0080019 | fatty-acyl-CoA reductase (alcohol-formin... | 0.052        |
|         | GO:0018024 | histone-lysine N-methyltransferase activ... | 0.067        |
|         | GO:0016774 | phosphotransferase activity, carboxyl gr... | 0.075        |
|         | GO:0042578 | phosphoric ester hydrolase activity         | 0.076        |

## 4.2 Leaf Postflowering clusters

### 4.2.1 Leaf - Postflowering - Cluster 1

| GO type | GO ID      | Description                                 | Adj. p-value |
|---------|------------|---------------------------------------------|--------------|
|         | GO:0016310 | phosphorylation                             | 0.000        |
|         | GO:0019684 | photosynthesis, light reaction              | 0.000        |
|         | GO:0044262 | cellular carbohydrate metabolic process     | 0.000        |
|         | GO:0044281 | small molecule metabolic process            | 0.000        |
|         | GO:0005975 | carbohydrate metabolic process              | 0.000        |
|         | GO:0007165 | signal transduction                         | 0.000        |
|         | GO:0023052 | signaling                                   | 0.000        |
|         | GO:0044264 | cellular polysaccharide metabolic proces... | 0.000        |
|         | GO:0007154 | cell communication                          | 0.000        |
|         | GO:0042737 | drug catabolic process                      | 0.000        |
|         | GO:0008299 | isoprenoid biosynthetic process             | 0.000        |
|         | GO:0009767 | photosynthetic electron transport chain     | 0.001        |
|         | GO:0044283 | small molecule biosynthetic process         | 0.001        |
|         | GO:0072330 | monocarboxylic acid biosynthetic process    | 0.003        |
|         | GO:0043436 | oxoacid metabolic process                   | 0.004        |
|         | GO:0005982 | starch metabolic process                    | 0.004        |
|         | GO:0050801 | ion homeostasis                             | 0.004        |
|         | GO:0006082 | organic acid metabolic process              | 0.005        |
|         | GO:0006631 | fatty acid metabolic process                | 0.005        |
|         | GO:0006721 | terpenoid metabolic process                 | 0.005        |
|         | GO:0051188 | cofactor biosynthetic process               | 0.005        |
|         | GO:0009606 | tropism                                     | 0.005        |
|         | GO:0030243 | cellulose metabolic process                 | 0.006        |
|         | GO:0009699 | phenylpropanoid biosynthetic process        | 0.006        |
|         | GO:0019752 | carboxylic acid metabolic process           | 0.007        |
|         | GO:0055065 | metal ion homeostasis                       | 0.007        |
|         | GO:0006633 | fatty acid biosynthetic process             | 0.007        |
|         | GO:0042546 | cell wall biogenesis                        | 0.008        |
|         | GO:0050896 | response to stimulus                        | 0.009        |
|         | GO:0055080 | cation homeostasis                          | 0.009        |
|         | GO:0071482 | cellular response to light stimulus         | 0.010        |
|         | GO:1990748 | cellular detoxification                     | 0.011        |
|         | GO:0009605 | response to external stimulus               | 0.011        |
|         | GO:0022900 | electron transport chain                    | 0.011        |
|         | GO:0010383 | cell wall polysaccharide metabolic proce... | 0.011        |
|         | GO:0016052 | carbohydrate catabolic process              | 0.012        |
|         | GO:0097237 | cellular response to toxic substance        | 0.012        |
|         | GO:0016114 | terpenoid biosynthetic process              | 0.013        |
|         | GO:0042445 | hormone metabolic process                   | 0.013        |
|         | GO:0098869 | cellular oxidant detoxification             | 0.013        |
|         | GO:0009201 | ribonucleoside triphosphate biosynthetic... | 0.013        |
|         | GO:0006754 | ATP biosynthetic process                    | 0.014        |
|         | GO:0009142 | nucleoside triphosphate biosynthetic pro... | 0.014        |
|         | GO:0010410 | hemicellulose metabolic process             | 0.014        |
|         | GO:0098771 | inorganic ion homeostasis                   | 0.014        |

Continued on next page



| GO type | GO ID      | Description                                 | Adj. p-value |
|---------|------------|---------------------------------------------|--------------|
|         | GO:0007166 | cell surface receptor signaling pathway     | 0.015        |
|         | GO:0009145 | purine nucleoside triphosphate biosynthe... | 0.016        |
|         | GO:0009206 | purine ribonucleoside triphosphate biosy... | 0.016        |
|         | GO:0051274 | beta-glucan biosynthetic process            | 0.016        |
|         | GO:0006464 | cellular protein modification process       | 0.017        |
|         | GO:0018298 | protein-chromophore linkage                 | 0.017        |
|         | GO:0036211 | protein modification process                | 0.017        |
|         | GO:0009637 | response to blue light                      | 0.018        |
|         | GO:0010114 | response to red light                       | 0.019        |
|         | GO:0009072 | aromatic amino acid family metabolic pro... | 0.021        |
|         | GO:0015985 | energy coupled proton transport, down el... | 0.021        |
|         | GO:0015986 | ATP synthesis coupled proton transport      | 0.021        |
|         | GO:0010817 | regulation of hormone levels                | 0.021        |
|         | GO:0048467 | gynoecium development                       | 0.022        |
|         | GO:0046854 | phosphatidylinositol phosphorylation        | 0.022        |
|         | GO:0006779 | porphyrin-containing compound biosynthet... | 0.023        |
|         | GO:0010118 | stomatal movement                           | 0.023        |
|         | GO:0090698 | post-embryonic plant morphogenesis          | 0.025        |
|         | GO:0009698 | phenylpropanoid metabolic process           | 0.026        |
|         | GO:0071214 | cellular response to abiotic stimulus       | 0.026        |
|         | GO:0104004 | cellular response to environmental stimu... | 0.026        |
|         | GO:0034754 | cellular hormone metabolic process          | 0.028        |
|         | GO:0009150 | purine ribonucleotide metabolic process     | 0.029        |
|         | GO:0051273 | beta-glucan metabolic process               | 0.029        |
|         | GO:0051716 | cellular response to stimulus               | 0.029        |
|         | GO:0009888 | tissue development                          | 0.033        |
|         | GO:0033014 | tetrapyrrole biosynthetic process           | 0.033        |
|         | GO:0010374 | stomatal complex development                | 0.034        |
|         | GO:0009832 | plant-type cell wall biogenesis             | 0.034        |
|         | GO:0019318 | hexose metabolic process                    | 0.034        |
|         | GO:0048440 | carpel development                          | 0.035        |
|         | GO:0071478 | cellular response to radiation              | 0.035        |
|         | GO:0046834 | lipid phosphorylation                       | 0.035        |
|         | GO:0009152 | purine ribonucleotide biosynthetic proce... | 0.036        |
|         | GO:0015995 | chlorophyll biosynthetic process            | 0.036        |
|         | GO:0023014 | signal transduction by protein phosphory... | 0.036        |
|         | GO:0010103 | stomatal complex morphogenesis              | 0.037        |
|         | GO:0051186 | cofactor metabolic process                  | 0.037        |
|         | GO:0045944 | positive regulation of transcription by ... | 0.039        |
|         | GO:0007017 | microtubule-based process                   | 0.040        |
|         | GO:0046034 | ATP metabolic process                       | 0.040        |
|         | GO:0051128 | regulation of cellular component organiz... | 0.040        |
|         | GO:0006163 | purine nucleotide metabolic process         | 0.041        |
|         | GO:0071495 | cellular response to endogenous stimulus    | 0.041        |
|         | GO:0006952 | defense response                            | 0.041        |
|         | GO:0009141 | nucleoside triphosphate metabolic proces... | 0.041        |
|         | GO:0009074 | aromatic amino acid family catabolic pro... | 0.042        |
|         | GO:0019637 | organophosphate metabolic process           | 0.042        |
|         | GO:0051701 | interaction with host                       | 0.042        |

Continued on next page

| GO type | GO ID      | Description                                 | Adj. p-value |
|---------|------------|---------------------------------------------|--------------|
|         | GO:0090627 | plant epidermal cell differentiation        | 0.042        |
|         | GO:0032870 | cellular response to hormone stimulus       | 0.043        |
|         | GO:0000272 | polysaccharide catabolic process            | 0.043        |
|         | GO:0051704 | multi-organism process                      | 0.044        |
|         | GO:0034762 | regulation of transmembrane transport       | 0.046        |
|         | GO:0006164 | purine nucleotide biosynthetic process      | 0.047        |
|         | GO:0031408 | oxylipin biosynthetic process               | 0.048        |
|         | GO:0006753 | nucleoside phosphate metabolic process      | 0.049        |
|         | GO:0006270 | DNA replication initiation                  | 0.049        |
|         | GO:0009416 | response to light stimulus                  | 0.049        |
|         | GO:0009629 | response to gravity                         | 0.050        |
|         | GO:0009630 | gravitropism                                | 0.050        |
|         | GO:0009734 | auxin-activated signaling pathway           | 0.050        |
|         | GO:0072522 | purine-containing compound biosynthetic ... | 0.050        |
|         | GO:0071483 | cellular response to blue light             | 0.052        |
|         | GO:0042440 | pigment metabolic process                   | 0.053        |
|         | GO:0006732 | coenzyme metabolic process                  | 0.053        |
|         | GO:0035670 | plant-type ovary development                | 0.053        |
|         | GO:0009314 | response to radiation                       | 0.054        |
|         | GO:0016055 | Wnt signaling pathway                       | 0.055        |
|         | GO:0098656 | anion transmembrane transport               | 0.055        |
|         | GO:0198738 | cell-cell signaling by wnt                  | 0.055        |
|         | GO:1905114 | cell surface receptor signaling pathway ... | 0.055        |
|         | GO:0009958 | positive gravitropism                       | 0.055        |
|         | GO:0007267 | cell-cell signaling                         | 0.059        |
|         | GO:0034765 | regulation of ion transmembrane transpor... | 0.059        |
|         | GO:1905392 | plant organ morphogenesis                   | 0.059        |
|         | GO:0009144 | purine nucleoside triphosphate metabolic... | 0.059        |
|         | GO:0009165 | nucleotide biosynthetic process             | 0.059        |
|         | GO:0009199 | ribonucleoside triphosphate metabolic pr... | 0.059        |
|         | GO:0009205 | purine ribonucleoside triphosphate metab... | 0.059        |
|         | GO:1901293 | nucleoside phosphate biosynthetic proces... | 0.061        |
|         | GO:0009668 | plastid membrane organization               | 0.061        |
|         | GO:0010027 | thylakoid membrane organization             | 0.061        |
|         | GO:0009117 | nucleotide metabolic process                | 0.062        |
|         | GO:0016109 | tetraterpenoid biosynthetic process         | 0.062        |
|         | GO:0016117 | carotenoid biosynthetic process             | 0.062        |
|         | GO:0070887 | cellular response to chemical stimulus      | 0.063        |
|         | GO:0031407 | oxylipin metabolic process                  | 0.064        |
|         | GO:0009127 | purine nucleoside monophosphate biosynth... | 0.064        |
|         | GO:0009168 | purine ribonucleoside monophosphate bios... | 0.064        |
|         | GO:0018105 | peptidyl-serine phosphorylation             | 0.064        |
|         | GO:0019693 | ribose phosphate metabolic process          | 0.065        |
|         | GO:0016108 | tetraterpenoid metabolic process            | 0.066        |
|         | GO:0016116 | carotenoid metabolic process                | 0.066        |
|         | GO:0009607 | response to biotic stimulus                 | 0.066        |
|         | GO:0010218 | response to far red light                   | 0.066        |
|         | GO:0071365 | cellular response to auxin stimulus         | 0.066        |
|         | GO:0043269 | regulation of ion transport                 | 0.066        |

Continued on next page

| GO type | GO ID      | Description                                 | Adj. p-value |
|---------|------------|---------------------------------------------|--------------|
|         | GO:0009260 | ribonucleotide biosynthetic process         | 0.067        |
|         | GO:0046390 | ribose phosphate biosynthetic process       | 0.067        |
|         | GO:0048481 | plant ovule development                     | 0.070        |
|         | GO:0009124 | nucleoside monophosphate biosynthetic pr... | 0.071        |
|         | GO:0006897 | endocytosis                                 | 0.071        |
|         | GO:0009126 | purine nucleoside monophosphate metaboli... | 0.071        |
|         | GO:0009167 | purine ribonucleoside monophosphate meta... | 0.071        |
|         | GO:0009639 | response to red or far red light            | 0.071        |
|         | GO:0043207 | response to external biotic stimulus        | 0.071        |
|         | GO:0051707 | response to other organism                  | 0.071        |
|         | GO:0072507 | divalent inorganic cation homeostasis       | 0.071        |
|         | GO:0009733 | response to auxin                           | 0.072        |
|         | GO:0072521 | purine-containing compound metabolic pro... | 0.072        |
|         | GO:0008356 | asymmetric cell division                    | 0.073        |
|         | GO:0009259 | ribonucleotide metabolic process            | 0.074        |
|         | GO:0046777 | protein autophosphorylation                 | 0.074        |
|         | GO:0010411 | xyloglucan metabolic process                | 0.075        |
|         | GO:0035556 | intracellular signal transduction           | 0.075        |
|         | GO:0018209 | peptidyl-serine modification                | 0.078        |
|         | GO:0016998 | cell wall macromolecule catabolic proces... | 0.081        |
|         | GO:1901135 | carbohydrate derivative metabolic proces... | 0.083        |
|         | GO:0006816 | calcium ion transport                       | 0.088        |
|         | GO:0022604 | regulation of cell morphogenesis            | 0.088        |
|         | GO:0009690 | cytokinin metabolic process                 | 0.092        |
|         | GO:0006108 | malate metabolic process                    | 0.094        |
|         | GO:0072524 | pyridine-containing compound metabolic p... | 0.094        |
|         | GO:0005984 | disaccharide metabolic process              | 0.097        |
|         | GO:0072525 | pyridine-containing compound biosyntheti... | 0.097        |
|         | GO:0042168 | heme metabolic process                      | 0.098        |
|         | GO:0009534 | chloroplast thylakoid                       | 0.000        |
|         | GO:0016020 | membrane                                    | 0.000        |
|         | GO:0031224 | intrinsic component of membrane             | 0.000        |
|         | GO:0031977 | thylakoid lumen                             | 0.000        |
|         | GO:0009521 | photosystem                                 | 0.000        |
|         | GO:0005618 | cell wall                                   | 0.000        |
|         | GO:0030312 | external encapsulating structure            | 0.000        |
|         | GO:0009505 | plant-type cell wall                        | 0.004        |
|         | GO:0048046 | apoplast                                    | 0.004        |
| CC      | GO:0043596 | nuclear replication fork                    | 0.011        |
|         | GO:0005874 | microtubule                                 | 0.015        |
|         | GO:0099080 | supramolecular complex                      | 0.019        |
|         | GO:0099081 | supramolecular polymer                      | 0.019        |
|         | GO:0099512 | supramolecular fiber                        | 0.019        |
|         | GO:0099513 | polymeric cytoskeletal fiber                | 0.019        |
|         | GO:0009524 | phragmoplast                                | 0.032        |
|         | GO:0015629 | actin cytoskeleton                          | 0.043        |
|         | GO:0010319 | stromule                                    | 0.045        |
|         | GO:0031225 | anchored component of membrane              | 0.073        |
|         | GO:0000347 | THO complex                                 | 0.099        |

Continued on next page

| GO type | GO ID      | Description                                 | Adj. p-value |
|---------|------------|---------------------------------------------|--------------|
|         | GO:0016301 | kinase activity                             | 0.000        |
|         | GO:0016773 | phosphotransferase activity, alcohol gro... | 0.000        |
|         | GO:0032559 | adenyl ribonucleotide binding               | 0.000        |
|         | GO:0043168 | anion binding                               | 0.000        |
|         | GO:0008144 | drug binding                                | 0.000        |
|         | GO:0016798 | hydrolase activity, acting on glycosyl b... | 0.000        |
|         | GO:0003774 | motor activity                              | 0.000        |
|         | GO:0003777 | microtubule motor activity                  | 0.000        |
|         | GO:0016829 | lyase activity                              | 0.000        |
|         | GO:0004871 | signal transducer activity                  | 0.000        |
|         | GO:0042626 | ATPase activity, coupled to transmembran... | 0.001        |
|         | GO:0005516 | calmodulin binding                          | 0.001        |
|         | GO:0015399 | primary active transmembrane transporter... | 0.001        |
|         | GO:0015405 | P-P-bond-hydrolysis-driven transmembrane... | 0.001        |
|         | GO:0042578 | phosphoric ester hydrolase activity         | 0.002        |
|         | GO:0043492 | ATPase activity, coupled to movement of ... | 0.002        |
|         | GO:0016835 | carbon-oxygen lyase activity                | 0.002        |
|         | GO:0001871 | pattern binding                             | 0.003        |
|         | GO:0003779 | actin binding                               | 0.003        |
|         | GO:0008236 | serine-type peptidase activity              | 0.003        |
|         | GO:0017171 | serine hydrolase activity                   | 0.003        |
|         | GO:0022804 | active transmembrane transporter activit... | 0.003        |
|         | GO:0030247 | polysaccharide binding                      | 0.003        |
|         | GO:0031409 | pigment binding                             | 0.003        |
|         | GO:0008238 | exopeptidase activity                       | 0.006        |
|         | GO:0015923 | mannosidase activity                        | 0.007        |
|         | GO:0046933 | proton-transporting ATP synthase activit... | 0.011        |
|         | GO:0042349 | guiding stereospecific synthesis activit... | 0.013        |
|         | GO:0015085 | calcium ion transmembrane transporter ac... | 0.015        |
|         | GO:0016762 | xyloglucan:xyloglucosyl transferase acti... | 0.019        |
|         | GO:0005096 | GTPase activator activity                   | 0.020        |
| MF      | GO:0030246 | carbohydrate binding                        | 0.022        |
|         | GO:0016614 | oxidoreductase activity, acting on CH-OH... | 0.035        |
|         | GO:0016615 | malate dehydrogenase activity               | 0.039        |
|         | GO:0016887 | ATPase activity                             | 0.050        |
|         | GO:0008422 | beta-glucosidase activity                   | 0.052        |
|         | GO:0030594 | neurotransmitter receptor activity          | 0.052        |
|         | GO:0046910 | pectinesterase inhibitor activity           | 0.056        |
|         | GO:0038023 | signaling receptor activity                 | 0.060        |
|         | GO:0060089 | molecular transducer activity               | 0.060        |
|         | GO:2001070 | starch binding                              | 0.062        |
|         | GO:0030695 | GTPase regulator activity                   | 0.064        |
|         | GO:0016717 | oxidoreductase activity, acting on paire... | 0.064        |
|         | GO:0008134 | transcription factor binding                | 0.068        |
|         | GO:0004970 | ionotropic glutamate receptor activity      | 0.068        |
|         | GO:0005230 | extracellular ligand-gated ion channel a... | 0.068        |
|         | GO:0008066 | glutamate receptor activity                 | 0.068        |
|         | GO:0022824 | transmitter-gated ion channel activity      | 0.068        |
|         | GO:0022835 | transmitter-gated channel activity          | 0.068        |

Continued on next page

| GO type | GO ID      | Description                                 | Adj. p-value |
|---------|------------|---------------------------------------------|--------------|
|         | GO:0001228 | transcriptional activator activity, RNA ... | 0.073        |
|         | GO:0016616 | oxidoreductase activity, acting on the C... | 0.074        |
|         | GO:0004659 | prenyltransferase activity                  | 0.074        |
|         | GO:0051015 | actin filament binding                      | 0.075        |
|         | GO:0004888 | transmembrane signaling receptor activit... | 0.076        |
|         | GO:0019901 | protein kinase binding                      | 0.077        |
|         | GO:0008171 | O-methyltransferase activity                | 0.077        |
|         | GO:0015556 | C4-dicarboxylate transmembrane transport... | 0.080        |
|         | GO:0016462 | pyrophosphatase activity                    | 0.083        |
|         | GO:0015925 | galactosidase activity                      | 0.094        |
|         | GO:0016405 | CoA-ligase activity                         | 0.095        |
|         | GO:0016788 | hydrolase activity, acting on ester bond... | 0.095        |
|         | GO:0019829 | cation-transporting ATPase activity         | 0.100        |
|         | GO:0022853 | active ion transmembrane transporter act... | 0.100        |
|         | GO:0042625 | ATPase coupled ion transmembrane transpo... | 0.100        |

#### 4.2.2 Leaf - Postflowering - Cluster 2

| GO type | GO ID      | Description                                 | Adj. p-value |
|---------|------------|---------------------------------------------|--------------|
|         | GO:0090305 | nucleic acid phosphodiester bond hydroly... | 0.000        |
|         | GO:0042255 | ribosome assembly                           | 0.000        |
|         | GO:1900864 | mitochondrial RNA modification              | 0.001        |
|         | GO:0070925 | organelle assembly                          | 0.007        |
|         | GO:0019585 | glucuronate metabolic process               | 0.008        |
|         | GO:0052695 | cellular glucuronidation                    | 0.008        |
|         | GO:0052696 | flavonoid glucuronidation                   | 0.008        |
|         | GO:0090502 | RNA phosphodiester bond hydrolysis, endo... | 0.009        |
|         | GO:0000959 | mitochondrial RNA metabolic process         | 0.010        |
|         | GO:0006281 | DNA repair                                  | 0.010        |
|         | GO:0016569 | covalent chromatin modification             | 0.010        |
|         | GO:0019219 | regulation of nucleobase-containing comp... | 0.014        |
|         | GO:0006063 | uronic acid metabolic process               | 0.015        |
|         | GO:0006974 | cellular response to DNA damage stimulus    | 0.020        |
|         | GO:0071103 | DNA conformation change                     | 0.023        |
|         | GO:0000027 | ribosomal large subunit assembly            | 0.023        |
|         | GO:0051252 | regulation of RNA metabolic process         | 0.031        |
|         | GO:0006298 | mismatch repair                             | 0.032        |
|         | GO:0006560 | proline metabolic process                   | 0.032        |
|         | GO:0016570 | histone modification                        | 0.033        |
|         | GO:0006333 | chromatin assembly or disassembly           | 0.033        |
|         | GO:0072528 | pyrimidine-containing compound biosynthe... | 0.033        |
| BP      | GO:0072527 | pyrimidine-containing compound metabolic... | 0.035        |
|         | GO:0045143 | homologous chromosome segregation           | 0.037        |
|         | GO:0006308 | DNA catabolic process                       | 0.042        |
|         | GO:0031497 | chromatin assembly                          | 0.042        |
|         | GO:0006259 | DNA metabolic process                       | 0.045        |
|         | GO:0018205 | peptidyl-lysine modification                | 0.052        |
|         | GO:0006323 | DNA packaging                               | 0.056        |
|         | GO:0002097 | tRNA wobble base modification               | 0.070        |
|         | GO:1903506 | regulation of nucleic acid-templated tra... | 0.071        |
|         | GO:2001141 | regulation of RNA biosynthetic process      | 0.071        |
|         | GO:0006334 | nucleosome assembly                         | 0.071        |
|         | GO:0019856 | pyrimidine nucleobase biosynthetic proce... | 0.072        |
|         | GO:0006355 | regulation of transcription, DNA-templat... | 0.073        |
|         | GO:0046700 | heterocycle catabolic process               | 0.079        |
|         | GO:0045132 | meiotic chromosome segregation              | 0.079        |
|         | GO:0002098 | tRNA wobble uridine modification            | 0.091        |
|         | GO:0009407 | toxin catabolic process                     | 0.091        |
|         | GO:0034728 | nucleosome organization                     | 0.091        |
|         | GO:0006206 | pyrimidine nucleobase metabolic process     | 0.091        |
|         | GO:0000302 | response to reactive oxygen species         | 0.092        |
|         | GO:0007129 | synapsis                                    | 0.092        |
|         | GO:0009266 | response to temperature stimulus            | 0.095        |
|         | GO:0044270 | cellular nitrogen compound catabolic pro... | 0.097        |
|         | GO:0005759 | mitochondrial matrix                        | 0.000        |

Continued on next page

| GO type | GO ID      | Description                                 | Adj. p-value |
|---------|------------|---------------------------------------------|--------------|
|         | GO:0000785 | chromatin                                   | 0.001        |
|         | GO:0000315 | organellar large ribosomal subunit          | 0.003        |
|         | GO:0005762 | mitochondrial large ribosomal subunit       | 0.003        |
|         | GO:0005686 | U2 snRNP                                    | 0.004        |
|         | GO:0005761 | mitochondrial ribosome                      | 0.009        |
|         | GO:0005694 | chromosome                                  | 0.010        |
|         | GO:0005689 | U12-type spliceosomal complex               | 0.010        |
|         | GO:0000786 | nucleosome                                  | 0.010        |
|         | GO:0044815 | DNA packaging complex                       | 0.016        |
|         | GO:0044427 | chromosomal part                            | 0.023        |
|         | GO:0099023 | tethering complex                           | 0.023        |
|         | GO:0000313 | organellar ribosome                         | 0.024        |
|         | GO:0000228 | nuclear chromosome                          | 0.071        |
|         | GO:0044437 | vacuolar part                               | 0.091        |
|         | GO:0071011 | precatalytic spliceosome                    | 0.097        |
|         | GO:0032993 | protein-DNA complex                         | 0.098        |
|         | GO:0004519 | endonuclease activity                       | 0.022        |
|         | GO:0051082 | unfolded protein binding                    | 0.038        |
| MF      | GO:0080043 | quercetin 3-O-glucosyltransferase activi... | 0.060        |
|         | GO:0080044 | quercetin 7-O-glucosyltransferase activi... | 0.060        |
|         | GO:0003690 | double-stranded DNA binding                 | 0.076        |
|         | GO:0003677 | DNA binding                                 | 0.081        |

### 4.2.3 Leaf - Postflowering - Cluster 3

| GO type | GO ID      | Description                                 | Adj. p-value |
|---------|------------|---------------------------------------------|--------------|
|         | GO:0007165 | signal transduction                         | 0.000        |
|         | GO:0071495 | cellular response to endogenous stimulus    | 0.000        |
|         | GO:0009607 | response to biotic stimulus                 | 0.000        |
|         | GO:0009867 | jasmonic acid mediated signaling pathway    | 0.000        |
|         | GO:0016567 | protein ubiquitination                      | 0.001        |
|         | GO:0031347 | regulation of defense response              | 0.002        |
|         | GO:0042742 | defense response to bacterium               | 0.003        |
|         | GO:0042493 | response to drug                            | 0.004        |
|         | GO:0009620 | response to fungus                          | 0.004        |
|         | GO:1901701 | cellular response to oxygen-containing c... | 0.004        |
|         | GO:0018196 | peptidyl-asparagine modification            | 0.005        |
|         | GO:0018279 | protein N-linked glycosylation via aspar... | 0.005        |
|         | GO:0009407 | toxin catabolic process                     | 0.006        |
|         | GO:0023014 | signal transduction by protein phosphory... | 0.006        |
|         | GO:0042737 | drug catabolic process                      | 0.007        |
|         | GO:0045087 | innate immune response                      | 0.008        |
|         | GO:0045088 | regulation of innate immune response        | 0.010        |
|         | GO:0009751 | response to salicylic acid                  | 0.010        |
|         | GO:0002682 | regulation of immune system process         | 0.010        |
|         | GO:0055085 | transmembrane transport                     | 0.011        |
|         | GO:0006022 | aminoglycan metabolic process               | 0.011        |
|         | GO:0006026 | aminoglycan catabolic process               | 0.011        |
|         | GO:0006030 | chitin metabolic process                    | 0.011        |
|         | GO:0006032 | chitin catabolic process                    | 0.011        |
|         | GO:0006487 | protein N-linked glycosylation              | 0.011        |
|         | GO:0006829 | zinc ion transport                          | 0.011        |
|         | GO:0009404 | toxin metabolic process                     | 0.011        |
|         | GO:0035556 | intracellular signal transduction           | 0.011        |
|         | GO:0046348 | amino sugar catabolic process               | 0.011        |
|         | GO:1901072 | glucosamine-containing compound cataboli... | 0.011        |
|         | GO:0050776 | regulation of immune response               | 0.012        |
|         | GO:0002376 | immune system process                       | 0.012        |
|         | GO:0036065 | fucosylation                                | 0.012        |
|         | GO:0009814 | defense response, incompatible interacti... | 0.016        |
|         | GO:0002237 | response to molecule of bacterial origin    | 0.016        |
|         | GO:0006955 | immune response                             | 0.016        |
|         | GO:0071577 | zinc ion transmembrane transport            | 0.017        |
|         | GO:0009627 | systemic acquired resistance                | 0.018        |
|         | GO:0050832 | defense response to fungus                  | 0.018        |
|         | GO:0005975 | carbohydrate metabolic process              | 0.020        |
|         | GO:0009863 | salicylic acid mediated signaling pathwa... | 0.020        |
|         | GO:0044267 | cellular protein metabolic process          | 0.020        |
| BP      | GO:1901071 | glucosamine-containing compound metaboli... | 0.024        |
|         | GO:0019585 | glucuronate metabolic process               | 0.026        |
|         | GO:0052695 | cellular glucuronidation                    | 0.026        |
|         | GO:0052696 | flavonoid glucuronidation                   | 0.026        |

Continued on next page



| GO type | GO ID      | Description                                 | Adj. p-value |
|---------|------------|---------------------------------------------|--------------|
|         | GO:0080134 | regulation of response to stress            | 0.026        |
|         | GO:0071446 | cellular response to salicylic acid stim... | 0.028        |
|         | GO:0008361 | regulation of cell size                     | 0.029        |
|         | GO:0009812 | flavonoid metabolic process                 | 0.030        |
|         | GO:0006063 | uronic acid metabolic process               | 0.031        |
|         | GO:0002684 | positive regulation of immune system pro... | 0.031        |
|         | GO:0050778 | positive regulation of immune response      | 0.031        |
|         | GO:0006665 | sphingolipid metabolic process              | 0.033        |
|         | GO:0006040 | amino sugar metabolic process               | 0.033        |
|         | GO:0044403 | symbiont process                            | 0.035        |
|         | GO:0015893 | drug transport                              | 0.035        |
|         | GO:0098655 | cation transmembrane transport              | 0.037        |
|         | GO:0006811 | ion transport                               | 0.037        |
|         | GO:0006813 | potassium ion transport                     | 0.037        |
|         | GO:0006855 | drug transmembrane transport                | 0.038        |
|         | GO:0009606 | tropism                                     | 0.039        |
|         | GO:0035303 | regulation of dephosphorylation             | 0.039        |
|         | GO:0009813 | flavonoid biosynthetic process              | 0.039        |
|         | GO:0006836 | neurotransmitter transport                  | 0.040        |
|         | GO:0045089 | positive regulation of innate immune res... | 0.044        |
|         | GO:0048878 | chemical homeostasis                        | 0.049        |
|         | GO:0072507 | divalent inorganic cation homeostasis       | 0.051        |
|         | GO:0034220 | ion transmembrane transport                 | 0.056        |
|         | GO:0010921 | regulation of phosphatase activity          | 0.058        |
|         | GO:0035304 | regulation of protein dephosphorylation     | 0.058        |
|         | GO:0072503 | cellular divalent inorganic cation homeo... | 0.058        |
|         | GO:0080163 | regulation of protein serine/threonine p... | 0.058        |
|         | GO:0060548 | negative regulation of cell death           | 0.059        |
|         | GO:0009645 | response to low light intensity stimulus    | 0.059        |
|         | GO:0030001 | metal ion transport                         | 0.062        |
|         | GO:0000209 | protein polyubiquitination                  | 0.077        |
|         | GO:0019538 | protein metabolic process                   | 0.080        |
|         | GO:0032535 | regulation of cellular component size       | 0.080        |
|         | GO:0090066 | regulation of anatomical structure size     | 0.080        |
|         | GO:0015804 | neutral amino acid transport                | 0.081        |
|         | GO:0009862 | systemic acquired resistance, salicylic ... | 0.083        |
|         | GO:0043666 | regulation of phosphoprotein phosphatase... | 0.084        |
|         | GO:0015850 | organic hydroxy compound transport          | 0.084        |
|         | GO:0042743 | hydrogen peroxide metabolic process         | 0.087        |
|         | GO:0043069 | negative regulation of programmed cell d... | 0.098        |
|         | GO:0005798 | Golgi-associated vesicle                    | 0.000        |
|         | GO:0030660 | Golgi-associated vesicle membrane           | 0.001        |
|         | GO:0044433 | cytoplasmic vesicle part                    | 0.003        |
|         | GO:0098827 | endoplasmic reticulum subcompartment        | 0.036        |
| CC      | GO:0009522 | photosystem I                               | 0.037        |
|         | GO:0005789 | endoplasmic reticulum membrane              | 0.043        |
|         | GO:0044432 | endoplasmic reticulum part                  | 0.047        |
|         | GO:0005576 | extracellular region                        | 0.072        |
|         | GO:0042175 | nuclear outer membrane-endoplasmic retic... | 0.076        |

Continued on next page

| GO type | GO ID      | Description                                 | Adj. p-value |
|---------|------------|---------------------------------------------|--------------|
|         | GO:0030246 | carbohydrate binding                        | 0.000        |
|         | GO:0005215 | transporter activity                        | 0.000        |
|         | GO:0004842 | ubiquitin-protein transferase activity      | 0.000        |
|         | GO:0004871 | signal transducer activity                  | 0.000        |
|         | GO:0046527 | glucosyltransferase activity                | 0.002        |
|         | GO:0005506 | iron ion binding                            | 0.003        |
|         | GO:0015075 | ion transmembrane transporter activity      | 0.003        |
|         | GO:0035251 | UDP-glucosyltransferase activity            | 0.003        |
|         | GO:0015318 | inorganic molecular entity transmembrane... | 0.004        |
|         | GO:0046873 | metal ion transmembrane transporter acti... | 0.005        |
|         | GO:0016758 | transferase activity, transferring hexos... | 0.006        |
|         | GO:0015291 | secondary active transmembrane transport... | 0.006        |
|         | GO:0022804 | active transmembrane transporter activit... | 0.006        |
|         | GO:0004568 | chitinase activity                          | 0.006        |
|         | GO:0016757 | transferase activity, transferring glyco... | 0.006        |
|         | GO:0000981 | RNA polymerase II transcription factor a... | 0.006        |
|         | GO:0015923 | mannosidase activity                        | 0.007        |
|         | GO:0008417 | fucosyltransferase activity                 | 0.007        |
|         | GO:0008324 | cation transmembrane transporter activit... | 0.008        |
|         | GO:0005385 | zinc ion transmembrane transporter activ... | 0.008        |
|         | GO:0008194 | UDP-glycosyltransferase activity            | 0.009        |
|         | GO:0072509 | divalent inorganic cation transmembrane ... | 0.022        |
|         | GO:0022890 | inorganic cation transmembrane transport... | 0.025        |
|         | GO:0015297 | antiporter activity                         | 0.027        |
|         | GO:0005326 | neurotransmitter transporter activity       | 0.027        |
|         | GO:0015276 | ligand-gated ion channel activity           | 0.038        |
|         | GO:0022834 | ligand-gated channel activity               | 0.038        |
|         | GO:0031625 | ubiquitin protein ligase binding            | 0.041        |
| MF      | GO:0044389 | ubiquitin-like protein ligase binding       | 0.041        |
|         | GO:0004190 | aspartic-type endopeptidase activity        | 0.042        |
|         | GO:0070001 | aspartic-type peptidase activity            | 0.042        |
|         | GO:0004553 | hydrolase activity, hydrolyzing O-glycos... | 0.042        |
|         | GO:0080043 | quercetin 3-O-glucosyltransferase activi... | 0.045        |
|         | GO:0080044 | quercetin 7-O-glucosyltransferase activi... | 0.045        |
|         | GO:0004864 | protein phosphatase inhibitor activity      | 0.057        |
|         | GO:0019212 | phosphatase inhibitor activity              | 0.057        |
|         | GO:0004970 | ionotropic glutamate receptor activity      | 0.058        |
|         | GO:0005230 | extracellular ligand-gated ion channel a... | 0.058        |
|         | GO:0008066 | glutamate receptor activity                 | 0.058        |
|         | GO:0022824 | transmitter-gated ion channel activity      | 0.058        |
|         | GO:0022835 | transmitter-gated channel activity          | 0.058        |
|         | GO:0005310 | dicarboxylic acid transmembrane transpor... | 0.059        |
|         | GO:0015238 | drug transmembrane transporter activity     | 0.059        |
|         | GO:0038023 | signaling receptor activity                 | 0.059        |
|         | GO:0060089 | molecular transducer activity               | 0.059        |
|         | GO:0015294 | solute:cation symporter activity            | 0.063        |
|         | GO:0016709 | oxidoreductase activity, acting on paire... | 0.064        |
|         | GO:0046915 | transition metal ion transmembrane trans... | 0.068        |
|         | GO:0030594 | neurotransmitter receptor activity          | 0.068        |

Continued on next page

| GO type | GO ID      | Description                                 | Adj. p-value |
|---------|------------|---------------------------------------------|--------------|
|         | GO:0015166 | polyol transmembrane transporter activit... | 0.072        |
|         | GO:0015293 | symporter activity                          | 0.072        |
|         | GO:1901618 | organic hydroxy compound transmembrane t... | 0.088        |
|         | GO:0019208 | phosphatase regulator activity              | 0.093        |
|         | GO:0019888 | protein phosphatase regulator activity      | 0.093        |
|         | GO:0015149 | hexose transmembrane transporter activit... | 0.094        |
|         | GO:0015179 | L-amino acid transmembrane transporter a... | 0.094        |
|         | GO:0015295 | solute:proton symporter activity            | 0.094        |

#### 4.2.4 Leaf - Postflowering - Cluster 4

| GO type | GO ID      | Description                                 | Adj. p-value |
|---------|------------|---------------------------------------------|--------------|
|         | GO:0006091 | generation of precursor metabolites and ... | 0.000        |
|         | GO:0044283 | small molecule biosynthetic process         | 0.000        |
|         | GO:1902600 | proton transmembrane transport              | 0.000        |
|         | GO:0009108 | coenzyme biosynthetic process               | 0.000        |
|         | GO:0055114 | oxidation-reduction process                 | 0.000        |
|         | GO:1901663 | quinone biosynthetic process                | 0.000        |
|         | GO:0006081 | cellular aldehyde metabolic process         | 0.002        |
|         | GO:0034404 | nucleobase-containing small molecule bio... | 0.002        |
|         | GO:0090501 | RNA phosphodiester bond hydrolysis          | 0.003        |
|         | GO:0006839 | mitochondrial transport                     | 0.003        |
|         | GO:0072522 | purine-containing compound biosynthetic ... | 0.003        |
|         | GO:0046034 | ATP metabolic process                       | 0.003        |
|         | GO:0006082 | organic acid metabolic process              | 0.004        |
|         | GO:0019752 | carboxylic acid metabolic process           | 0.004        |
|         | GO:0070925 | organelle assembly                          | 0.004        |
|         | GO:0043436 | oxoacid metabolic process                   | 0.004        |
|         | GO:0009628 | response to abiotic stimulus                | 0.005        |
|         | GO:0090305 | nucleic acid phosphodiester bond hydroly... | 0.005        |
|         | GO:0006164 | purine nucleotide biosynthetic process      | 0.005        |
|         | GO:0046434 | organophosphate catabolic process           | 0.006        |
|         | GO:0046185 | aldehyde catabolic process                  | 0.006        |
|         | GO:0090502 | RNA phosphodiester bond hydrolysis, endo... | 0.006        |
|         | GO:0042440 | pigment metabolic process                   | 0.008        |
|         | GO:0009156 | ribonucleoside monophosphate biosyntheti... | 0.009        |
|         | GO:0016053 | organic acid biosynthetic process           | 0.009        |
|         | GO:0046394 | carboxylic acid biosynthetic process        | 0.009        |
|         | GO:0009124 | nucleoside monophosphate biosynthetic pr... | 0.011        |
|         | GO:0022900 | electron transport chain                    | 0.013        |
|         | GO:0034655 | nucleobase-containing compound catabolic... | 0.013        |
|         | GO:0009152 | purine ribonucleotide biosynthetic proce... | 0.014        |
|         | GO:0008652 | cellular amino acid biosynthetic process    | 0.024        |
| BP      | GO:0046148 | pigment biosynthetic process                | 0.024        |
|         | GO:0046939 | nucleotide phosphorylation                  | 0.025        |
|         | GO:0006733 | oxidoreduction coenzyme metabolic proces... | 0.026        |
|         | GO:0006743 | ubiquinone metabolic process                | 0.026        |
|         | GO:0006744 | ubiquinone biosynthetic process             | 0.026        |
|         | GO:0015672 | monovalent inorganic cation transport       | 0.026        |
|         | GO:1901607 | alpha-amino acid biosynthetic process       | 0.027        |
|         | GO:0042180 | cellular ketone metabolic process           | 0.035        |
|         | GO:0009084 | glutamine family amino acid biosynthetic... | 0.038        |
|         | GO:0009201 | ribonucleoside triphosphate biosynthetic... | 0.045        |
|         | GO:0009145 | purine nucleoside triphosphate biosynthe... | 0.049        |
|         | GO:0009206 | purine ribonucleoside triphosphate biosy... | 0.049        |
|         | GO:0005977 | glycogen metabolic process                  | 0.054        |
|         | GO:0006112 | energy reserve metabolic process            | 0.054        |
|         | GO:0009142 | nucleoside triphosphate biosynthetic pro... | 0.054        |

Continued on next page

| GO type | GO ID      | Description                                 | Adj. p-value |
|---------|------------|---------------------------------------------|--------------|
|         | GO:0044282 | small molecule catabolic process            | 0.057        |
|         | GO:0006637 | acyl-CoA metabolic process                  | 0.064        |
|         | GO:0035383 | thioester metabolic process                 | 0.064        |
|         | GO:0006605 | protein targeting                           | 0.066        |
|         | GO:0009064 | glutamine family amino acid metabolic pr... | 0.068        |
|         | GO:0006165 | nucleoside diphosphate phosphorylation      | 0.069        |
|         | GO:0005978 | glycogen biosynthetic process               | 0.070        |
|         | GO:0009132 | nucleoside diphosphate metabolic process    | 0.070        |
|         | GO:1901605 | alpha-amino acid metabolic process          | 0.073        |
|         | GO:0016052 | carbohydrate catabolic process              | 0.074        |
|         | GO:0006520 | cellular amino acid metabolic process       | 0.076        |
|         | GO:0006560 | proline metabolic process                   | 0.076        |
|         | GO:0019725 | cellular homeostasis                        | 0.076        |
|         | GO:0009127 | purine nucleoside monophosphate biosynth... | 0.078        |
|         | GO:0009168 | purine ribonucleoside monophosphate bios... | 0.078        |
|         | GO:0043648 | dicarboxylic acid metabolic process         | 0.094        |
|         | GO:0006020 | inositol metabolic process                  | 0.094        |
|         | GO:0009526 | plastid envelope                            | 0.000        |
|         | GO:0098798 | mitochondrial protein complex               | 0.000        |
|         | GO:0042651 | thylakoid membrane                          | 0.000        |
|         | GO:0070469 | respiratory chain                           | 0.000        |
|         | GO:0031966 | mitochondrial membrane                      | 0.000        |
|         | GO:0044455 | mitochondrial membrane part                 | 0.000        |
|         | GO:0005743 | mitochondrial inner membrane                | 0.000        |
|         | GO:0033176 | proton-transporting V-type ATPase comple... | 0.000        |
|         | GO:0009528 | plastid inner membrane                      | 0.000        |
| CC      | GO:0042170 | plastid membrane                            | 0.000        |
|         | GO:0042646 | plastid nucleoid                            | 0.000        |
|         | GO:0070069 | cytochrome complex                          | 0.001        |
|         | GO:0031090 | organelle membrane                          | 0.001        |
|         | GO:0019867 | outer membrane                              | 0.003        |
|         | GO:0031968 | organelle outer membrane                    | 0.006        |
|         | GO:0031984 | organelle subcompartment                    | 0.037        |
|         | GO:0048046 | apoplast                                    | 0.060        |
|         | GO:0042644 | chloroplast nucleoid                        | 0.071        |
|         | GO:0005741 | mitochondrial outer membrane                | 0.090        |
|         | GO:0016491 | oxidoreductase activity                     | 0.000        |
|         | GO:0004519 | endonuclease activity                       | 0.001        |
|         | GO:0016741 | transferase activity, transferring one-c... | 0.001        |
|         | GO:0008168 | methyltransferase activity                  | 0.003        |
|         | GO:0016679 | oxidoreductase activity, acting on diphe... | 0.003        |
|         | GO:0016853 | isomerase activity                          | 0.003        |
|         | GO:0036442 | proton-exporting ATPase activity            | 0.004        |
| MF      | GO:0004518 | nuclease activity                           | 0.008        |
|         | GO:0016829 | lyase activity                              | 0.028        |
|         | GO:0004540 | ribonuclease activity                       | 0.039        |
|         | GO:0004521 | endoribonuclease activity                   | 0.042        |
|         | GO:0016830 | carbon-carbon lyase activity                | 0.061        |
|         | GO:0016788 | hydrolase activity, acting on ester bond... | 0.062        |

Continued on next page

---

| GO type | GO ID      | Description                | Adj. p-value |
|---------|------------|----------------------------|--------------|
|         | GO:0016407 | acetyltransferase activity | 0.084        |
|         | GO:0003824 | catalytic activity         | 0.087        |

---

#### 4.2.5 Leaf - Postflowering - Cluster 5

| GO type | GO ID      | Description                                 | Adj. p-value |
|---------|------------|---------------------------------------------|--------------|
|         | GO:0006163 | purine nucleotide metabolic process         | 0.000        |
|         | GO:0009165 | nucleotide biosynthetic process             | 0.000        |
|         | GO:0046434 | organophosphate catabolic process           | 0.000        |
|         | GO:0009161 | ribonucleoside monophosphate metabolic p... | 0.000        |
|         | GO:0006996 | organelle organization                      | 0.000        |
|         | GO:0044283 | small molecule biosynthetic process         | 0.000        |
|         | GO:0051188 | cofactor biosynthetic process               | 0.000        |
|         | GO:0009152 | purine ribonucleotide biosynthetic proce... | 0.000        |
|         | GO:0046034 | ATP metabolic process                       | 0.000        |
|         | GO:0009124 | nucleoside monophosphate biosynthetic pr... | 0.000        |
|         | GO:0006090 | pyruvate metabolic process                  | 0.001        |
|         | GO:1902600 | proton transmembrane transport              | 0.001        |
|         | GO:0006165 | nucleoside diphosphate phosphorylation      | 0.001        |
|         | GO:0009132 | nucleoside diphosphate metabolic process    | 0.001        |
|         | GO:0009156 | ribonucleoside monophosphate biosyntheti... | 0.001        |
|         | GO:0016052 | carbohydrate catabolic process              | 0.001        |
|         | GO:0009145 | purine nucleoside triphosphate biosynthe... | 0.002        |
|         | GO:0009206 | purine ribonucleoside triphosphate biosy... | 0.002        |
|         | GO:0046939 | nucleotide phosphorylation                  | 0.002        |
|         | GO:0009127 | purine nucleoside monophosphate biosynth... | 0.002        |
|         | GO:0009168 | purine ribonucleoside monophosphate bios... | 0.002        |
|         | GO:0019363 | pyridine nucleotide biosynthetic process    | 0.002        |
|         | GO:0072525 | pyridine-containing compound biosyntheti... | 0.003        |
|         | GO:0034404 | nucleobase-containing small molecule bio... | 0.003        |
|         | GO:1901292 | nucleoside phosphate catabolic process      | 0.003        |
|         | GO:0009201 | ribonucleoside triphosphate biosynthetic... | 0.003        |
|         | GO:0016053 | organic acid biosynthetic process           | 0.003        |
|         | GO:0046394 | carboxylic acid biosynthetic process        | 0.003        |
|         | GO:0034655 | nucleobase-containing compound catabolic... | 0.003        |
|         | GO:0051186 | cofactor metabolic process                  | 0.003        |
|         | GO:0009166 | nucleotide catabolic process                | 0.003        |
|         | GO:0055086 | nucleobase-containing small molecule met... | 0.003        |
|         | GO:0048856 | anatomical structure development            | 0.004        |
|         | GO:0006096 | glycolytic process                          | 0.004        |
|         | GO:0006757 | ATP generation from ADP                     | 0.004        |
|         | GO:0009135 | purine nucleoside diphosphate metabolic ... | 0.004        |
| BP      | GO:0009179 | purine ribonucleoside diphosphate metabo... | 0.004        |
|         | GO:0009185 | ribonucleoside diphosphate metabolic pro... | 0.004        |
|         | GO:0042866 | pyruvate biosynthetic process               | 0.004        |
|         | GO:0046031 | ADP metabolic process                       | 0.004        |
|         | GO:0009142 | nucleoside triphosphate biosynthetic pro... | 0.005        |
|         | GO:1901661 | quinone metabolic process                   | 0.005        |
|         | GO:1901663 | quinone biosynthetic process                | 0.005        |
|         | GO:1901137 | carbohydrate derivative biosynthetic pro... | 0.006        |
|         | GO:0007275 | multicellular organism development          | 0.006        |
|         | GO:0006733 | oxidoreduction coenzyme metabolic proces... | 0.006        |

Continued on next page

| GO type | GO ID      | Description                                 | Adj. p-value |
|---------|------------|---------------------------------------------|--------------|
|         | GO:0008610 | lipid biosynthetic process                  | 0.007        |
|         | GO:0006754 | ATP biosynthetic process                    | 0.008        |
|         | GO:0042181 | ketone biosynthetic process                 | 0.010        |
|         | GO:0006629 | lipid metabolic process                     | 0.010        |
|         | GO:0044255 | cellular lipid metabolic process            | 0.011        |
|         | GO:0019439 | aromatic compound catabolic process         | 0.014        |
|         | GO:0017144 | drug metabolic process                      | 0.014        |
|         | GO:0046496 | nicotinamide nucleotide metabolic proces... | 0.018        |
|         | GO:1901361 | organic cyclic compound catabolic proces... | 0.018        |
|         | GO:0072330 | monocarboxylic acid biosynthetic process    | 0.019        |
|         | GO:0044270 | cellular nitrogen compound catabolic pro... | 0.020        |
|         | GO:0046700 | heterocycle catabolic process               | 0.020        |
|         | GO:0072524 | pyridine-containing compound metabolic p... | 0.021        |
|         | GO:0032501 | multicellular organismal process            | 0.023        |
|         | GO:0032502 | developmental process                       | 0.024        |
|         | GO:0033043 | regulation of organelle organization        | 0.025        |
|         | GO:0019362 | pyridine nucleotide metabolic process       | 0.025        |
|         | GO:0006743 | ubiquinone metabolic process                | 0.028        |
|         | GO:0006744 | ubiquinone biosynthetic process             | 0.028        |
|         | GO:0065002 | intracellular protein transmembrane tran... | 0.039        |
|         | GO:0048229 | gametophyte development                     | 0.041        |
|         | GO:0015672 | monovalent inorganic cation transport       | 0.041        |
|         | GO:0071806 | protein transmembrane transport             | 0.043        |
|         | GO:0055114 | oxidation-reduction process                 | 0.053        |
|         | GO:0005975 | carbohydrate metabolic process              | 0.054        |
|         | GO:0048731 | system development                          | 0.059        |
|         | GO:0006644 | phospholipid metabolic process              | 0.081        |
|         | GO:0042180 | cellular ketone metabolic process           | 0.099        |
|         | GO:0043231 | intracellular membrane-bounded organelle    | 0.000        |
|         | GO:0009579 | thylakoid                                   | 0.000        |
|         | GO:0009534 | chloroplast thylakoid                       | 0.000        |
|         | GO:0019866 | organelle inner membrane                    | 0.000        |
|         | GO:0031966 | mitochondrial membrane                      | 0.000        |
|         | GO:0033176 | proton-transporting V-type ATPase comple... | 0.000        |
|         | GO:0005743 | mitochondrial inner membrane                | 0.000        |
|         | GO:0099080 | supramolecular complex                      | 0.001        |
|         | GO:0099081 | supramolecular polymer                      | 0.001        |
|         | GO:0099512 | supramolecular fiber                        | 0.001        |
| CC      | GO:0099513 | polymeric cytoskeletal fiber                | 0.001        |
|         | GO:0005874 | microtubule                                 | 0.001        |
|         | GO:0033178 | proton-transporting two-sector ATPase co... | 0.005        |
|         | GO:0015630 | microtubule cytoskeleton                    | 0.010        |
|         | GO:0005634 | nucleus                                     | 0.018        |
|         | GO:0044430 | cytoskeletal part                           | 0.031        |
|         | GO:0005856 | cytoskeleton                                | 0.036        |
|         | GO:0009574 | preprophase band                            | 0.052        |
|         | GO:0005881 | cytoplasmic microtubule                     | 0.087        |
|         | GO:0098796 | membrane protein complex                    | 0.087        |
|         | GO:0030863 | cortical cytoskeleton                       | 0.099        |

Continued on next page



| GO type | GO ID      | Description                                 | Adj. p-value |
|---------|------------|---------------------------------------------|--------------|
|         | GO:0030981 | cortical microtubule cytoskeleton           | 0.099        |
|         | GO:0003824 | catalytic activity                          | 0.000        |
|         | GO:0016817 | hydrolase activity, acting on acid anhyd... | 0.007        |
|         | GO:0016818 | hydrolase activity, acting on acid anhyd... | 0.007        |
|         | GO:0017111 | nucleoside-triphosphatase activity          | 0.007        |
| MF      | GO:0016462 | pyrophosphatase activity                    | 0.008        |
|         | GO:0016866 | intramolecular transferase activity         | 0.024        |
|         | GO:0016853 | isomerase activity                          | 0.026        |
|         | GO:0016651 | oxidoreductase activity, acting on NAD(P... | 0.031        |
|         | GO:0016887 | ATPase activity                             | 0.036        |
|         | GO:0003954 | NADH dehydrogenase activity                 | 0.066        |

#### 4.2.6 Leaf - Postflowering - Cluster 6

| GO type | GO ID      | Description                                 | Adj. p-value |
|---------|------------|---------------------------------------------|--------------|
|         | GO:0015850 | organic hydroxy compound transport          | 0.002        |
|         | GO:0046323 | glucose import                              | 0.003        |
|         | GO:0008645 | hexose transmembrane transport              | 0.003        |
|         | GO:0042493 | response to drug                            | 0.004        |
|         | GO:0015749 | monosaccharide transmembrane transport      | 0.004        |
|         | GO:0006022 | aminoglycan metabolic process               | 0.007        |
|         | GO:0018196 | peptidyl-asparagine modification            | 0.008        |
|         | GO:0018279 | protein N-linked glycosylation via aspar... | 0.008        |
|         | GO:0007166 | cell surface receptor signaling pathway     | 0.008        |
|         | GO:0007154 | cell communication                          | 0.009        |
|         | GO:0006487 | protein N-linked glycosylation              | 0.010        |
|         | GO:0071577 | zinc ion transmembrane transport            | 0.012        |
|         | GO:1901071 | glucosamine-containing compound metaboli... | 0.013        |
|         | GO:0019748 | secondary metabolic process                 | 0.014        |
|         | GO:0015791 | polyol transport                            | 0.015        |
|         | GO:1901565 | organonitrogen compound catabolic proces... | 0.019        |
|         | GO:0006829 | zinc ion transport                          | 0.021        |
|         | GO:0071495 | cellular response to endogenous stimulus    | 0.021        |
|         | GO:0071705 | nitrogen compound transport                 | 0.021        |
|         | GO:0008037 | cell recognition                            | 0.022        |
|         | GO:0032870 | cellular response to hormone stimulus       | 0.022        |
|         | GO:0071702 | organic substance transport                 | 0.022        |
|         | GO:0006887 | exocytosis                                  | 0.025        |
|         | GO:0006749 | glutathione metabolic process               | 0.025        |
|         | GO:0003333 | amino acid transmembrane transport          | 0.026        |
|         | GO:0009607 | response to biotic stimulus                 | 0.026        |
|         | GO:0048544 | recognition of pollen                       | 0.028        |
|         | GO:0071310 | cellular response to organic substance      | 0.028        |
|         | GO:0009875 | pollen-pistil interaction                   | 0.028        |
| BP      | GO:0006026 | aminoglycan catabolic process               | 0.032        |
|         | GO:0006030 | chitin metabolic process                    | 0.032        |
|         | GO:0006032 | chitin catabolic process                    | 0.032        |
|         | GO:0046348 | amino sugar catabolic process               | 0.032        |
|         | GO:1901072 | glucosamine-containing compound cataboli... | 0.032        |
|         | GO:0023051 | regulation of signaling                     | 0.032        |
|         | GO:1902531 | regulation of intracellular signal trans... | 0.033        |
|         | GO:0006865 | amino acid transport                        | 0.033        |
|         | GO:0043207 | response to external biotic stimulus        | 0.035        |
|         | GO:0051707 | response to other organism                  | 0.035        |
|         | GO:0010243 | response to organonitrogen compound         | 0.036        |
|         | GO:0006836 | neurotransmitter transport                  | 0.036        |
|         | GO:0009966 | regulation of signal transduction           | 0.038        |
|         | GO:0015804 | neutral amino acid transport                | 0.047        |
|         | GO:0006884 | cell volume homeostasis                     | 0.061        |
|         | GO:0009992 | cellular water homeostasis                  | 0.061        |
|         | GO:0015793 | glycerol transport                          | 0.061        |

Continued on next page

| GO type | GO ID      | Description                                  | Adj. p-value |
|---------|------------|----------------------------------------------|--------------|
|         | GO:0009755 | hormone-mediated signaling pathway           | 0.064        |
|         | GO:0071395 | cellular response to jasmonic acid stimu...  | 0.064        |
|         | GO:0032940 | secretion by cell                            | 0.068        |
|         | GO:0098542 | defense response to other organism           | 0.074        |
|         | GO:0009867 | jasmonic acid mediated signaling pathway     | 0.079        |
|         | GO:0046903 | secretion                                    | 0.085        |
|         | GO:0006904 | vesicle docking involved in exocytosis       | 0.089        |
|         | GO:0140029 | exocytic process                             | 0.089        |
|         | GO:0008643 | carbohydrate transport                       | 0.092        |
|         | GO:0006857 | oligopeptide transport                       | 0.096        |
|         | GO:0010646 | regulation of cell communication             | 0.096        |
|         | GO:0006040 | amino sugar metabolic process                | 0.097        |
|         | GO:0000151 | ubiquitin ligase complex                     | 0.000        |
|         | GO:0005886 | plasma membrane                              | 0.001        |
|         | GO:0031226 | intrinsic component of plasma membrane       | 0.003        |
|         | GO:0005783 | endoplasmic reticulum                        | 0.003        |
|         | GO:0071944 | cell periphery                               | 0.004        |
|         | GO:0030120 | vesicle coat                                 | 0.007        |
|         | GO:0099023 | tethering complex                            | 0.007        |
| CC      | GO:0044459 | plasma membrane part                         | 0.008        |
|         | GO:0005911 | cell-cell junction                           | 0.014        |
|         | GO:0030054 | cell junction                                | 0.014        |
|         | GO:0009506 | plasmodesma                                  | 0.015        |
|         | GO:0055044 | symplast                                     | 0.015        |
|         | GO:0005798 | Golgi-associated vesicle                     | 0.016        |
|         | GO:0030660 | Golgi-associated vesicle membrane            | 0.038        |
|         | GO:0000145 | exocyst                                      | 0.068        |
|         | GO:0004497 | monooxygenase activity                       | 0.000        |
|         | GO:0016705 | oxidoreductase activity, acting on paire...  | 0.000        |
|         | GO:0030246 | carbohydrate binding                         | 0.000        |
|         | GO:0043168 | anion binding                                | 0.002        |
|         | GO:0051213 | dioxygenase activity                         | 0.002        |
|         | GO:1901618 | organic hydroxy compound transmembrane t...  | 0.002        |
|         | GO:0005355 | glucose transmembrane transporter activi...  | 0.002        |
|         | GO:0046527 | glucosyltransferase activity                 | 0.003        |
|         | GO:0008194 | UDP-glycosyltransferase activity             | 0.004        |
|         | GO:0016758 | transferase activity, transferring hexos...  | 0.004        |
|         | GO:0043167 | ion binding                                  | 0.004        |
|         | GO:0015149 | hexose transmembrane transporter activit...  | 0.005        |
|         | GO:0015145 | monosaccharide transmembrane transporter...  | 0.005        |
|         | GO:0036094 | small molecule binding                       | 0.005        |
|         | GO:0005385 | zinc ion transmembrane transporter activ...  | 0.007        |
|         | GO:0015166 | polyol transmembrane transporter activit...  | 0.007        |
|         | GO:0016757 | transferase activity, transferring glyco...  | 0.007        |
|         | GO:0016772 | transferase activity, transferring phosph... | 0.009        |
|         | GO:0005215 | transporter activity                         | 0.009        |
|         | GO:0015293 | symporter activity                           | 0.011        |
|         | GO:0004364 | glutathione transferase activity             | 0.014        |
|         | GO:0015294 | solute:cation symporter activity             | 0.018        |

Continued on next page

MF

| GO type | GO ID      | Description                                 | Adj. p-value |
|---------|------------|---------------------------------------------|--------------|
|         | GO:0001871 | pattern binding                             | 0.019        |
|         | GO:0030247 | polysaccharide binding                      | 0.019        |
|         | GO:0005326 | neurotransmitter transporter activity       | 0.021        |
|         | GO:0015174 | basic amino acid transmembrane transport... | 0.021        |
|         | GO:0072509 | divalent inorganic cation transmembrane ... | 0.021        |
|         | GO:0004568 | chitinase activity                          | 0.024        |
|         | GO:0015291 | secondary active transmembrane transport... | 0.025        |
|         | GO:0015168 | glycerol transmembrane transporter activ... | 0.028        |
|         | GO:0035673 | oligopeptide transmembrane transporter a... | 0.028        |
|         | GO:0015295 | solute:proton symporter activity            | 0.035        |
|         | GO:0005372 | water transmembrane transporter activity    | 0.045        |
|         | GO:0015250 | water channel activity                      | 0.045        |
|         | GO:0015254 | glycerol channel activity                   | 0.045        |
|         | GO:0015171 | amino acid transmembrane transporter act... | 0.045        |
|         | GO:0008144 | drug binding                                | 0.046        |
|         | GO:1990837 | sequence-specific double-stranded DNA bi... | 0.049        |
|         | GO:0005351 | carbohydrate:proton symporter activity      | 0.052        |
|         | GO:0005402 | carbohydrate:cation symporter activity      | 0.052        |
|         | GO:0015297 | antiporter activity                         | 0.052        |
|         | GO:0042562 | hormone binding                             | 0.053        |
|         | GO:0005524 | ATP binding                                 | 0.055        |
|         | GO:0051119 | sugar transmembrane transporter activity    | 0.060        |
|         | GO:0015179 | L-amino acid transmembrane transporter a... | 0.060        |
|         | GO:0015144 | carbohydrate transmembrane transporter a... | 0.069        |
|         | GO:0042887 | amide transmembrane transporter activity    | 0.074        |
|         | GO:0046915 | transition metal ion transmembrane trans... | 0.099        |

#### 4.2.7 Leaf - Postflowering - Cluster 7

| GO type | GO ID      | Description                                 | Adj. p-value |
|---------|------------|---------------------------------------------|--------------|
|         | GO:0019684 | photosynthesis, light reaction              | 0.000        |
|         | GO:0051188 | cofactor biosynthetic process               | 0.000        |
|         | GO:0019637 | organophosphate metabolic process           | 0.000        |
|         | GO:0046394 | carboxylic acid biosynthetic process        | 0.000        |
|         | GO:0006732 | coenzyme metabolic process                  | 0.000        |
|         | GO:0009150 | purine ribonucleotide metabolic process     | 0.000        |
|         | GO:0009123 | nucleoside monophosphate metabolic proce... | 0.000        |
|         | GO:0071554 | cell wall organization or biogenesis        | 0.000        |
|         | GO:0009108 | coenzyme biosynthetic process               | 0.000        |
|         | GO:0009161 | ribonucleoside monophosphate metabolic p... | 0.000        |
|         | GO:0008610 | lipid biosynthetic process                  | 0.000        |
|         | GO:0009165 | nucleotide biosynthetic process             | 0.000        |
|         | GO:0033014 | tetrapyrrole biosynthetic process           | 0.000        |
|         | GO:0046034 | ATP metabolic process                       | 0.000        |
|         | GO:0016052 | carbohydrate catabolic process              | 0.000        |
|         | GO:0009124 | nucleoside monophosphate biosynthetic pr... | 0.000        |
|         | GO:0009156 | ribonucleoside monophosphate biosyntheti... | 0.000        |
|         | GO:0009145 | purine nucleoside triphosphate biosynthe... | 0.000        |
|         | GO:0009206 | purine ribonucleoside triphosphate biosy... | 0.000        |
|         | GO:0006164 | purine nucleotide biosynthetic process      | 0.000        |
|         | GO:0006631 | fatty acid metabolic process                | 0.000        |
|         | GO:0009152 | purine ribonucleotide biosynthetic proce... | 0.000        |
|         | GO:0009260 | ribonucleotide biosynthetic process         | 0.000        |
|         | GO:0046390 | ribose phosphate biosynthetic process       | 0.000        |
|         | GO:0042546 | cell wall biogenesis                        | 0.000        |
|         | GO:0019359 | nicotinamide nucleotide biosynthetic pro... | 0.000        |
|         | GO:0044262 | cellular carbohydrate metabolic process     | 0.000        |
|         | GO:0071555 | cell wall organization                      | 0.000        |
|         | GO:0009201 | ribonucleoside triphosphate biosynthetic... | 0.000        |
|         | GO:0072525 | pyridine-containing compound biosyntheti... | 0.000        |
|         | GO:1902600 | proton transmembrane transport              | 0.000        |
|         | GO:0006090 | pyruvate metabolic process                  | 0.000        |
|         | GO:0046939 | nucleotide phosphorylation                  | 0.000        |
|         | GO:0009073 | aromatic amino acid family biosynthetic ... | 0.000        |
|         | GO:0042401 | cellular biogenic amine biosynthetic pro... | 0.000        |
|         | GO:0015980 | energy derivation by oxidation of organi... | 0.000        |
|         | GO:0098869 | cellular oxidant detoxification             | 0.000        |
|         | GO:0006165 | nucleoside diphosphate phosphorylation      | 0.000        |
|         | GO:0008299 | isoprenoid biosynthetic process             | 0.000        |
|         | GO:0045333 | cellular respiration                        | 0.001        |
|         | GO:0009060 | aerobic respiration                         | 0.001        |
|         | GO:0006081 | cellular aldehyde metabolic process         | 0.001        |
|         | GO:0010383 | cell wall polysaccharide metabolic proce... | 0.001        |
|         | GO:0006006 | glucose metabolic process                   | 0.002        |
|         | GO:0006520 | cellular amino acid metabolic process       | 0.002        |
|         | GO:0033692 | cellular polysaccharide biosynthetic pro... | 0.002        |

Continued on next page

| GO type | GO ID      | Description                                 | Adj. p-value |
|---------|------------|---------------------------------------------|--------------|
|         | GO:0009768 | photosynthesis, light harvesting in phot... | 0.002        |
|         | GO:0010109 | regulation of photosynthesis                | 0.002        |
|         | GO:0010410 | hemicellulose metabolic process             | 0.002        |
|         | GO:0045491 | xylan metabolic process                     | 0.002        |
|         | GO:0016311 | dephosphorylation                           | 0.003        |
|         | GO:0000162 | tryptophan biosynthetic process             | 0.003        |
|         | GO:0046219 | indolalkylamine biosynthetic process        | 0.003        |
|         | GO:0019252 | starch biosynthetic process                 | 0.003        |
|         | GO:1901137 | carbohydrate derivative biosynthetic pro... | 0.003        |
|         | GO:0006108 | malate metabolic process                    | 0.003        |
|         | GO:0044275 | cellular carbohydrate catabolic process     | 0.003        |
|         | GO:0009664 | plant-type cell wall organization           | 0.004        |
|         | GO:0034637 | cellular carbohydrate biosynthetic proce... | 0.004        |
|         | GO:0006099 | tricarboxylic acid cycle                    | 0.004        |
|         | GO:0015988 | energy coupled proton transmembrane tran... | 0.004        |
|         | GO:0015991 | ATP hydrolysis coupled proton transport     | 0.004        |
|         | GO:0090662 | ATP hydrolysis coupled transmembrane tra... | 0.004        |
|         | GO:0099131 | ATP hydrolysis coupled ion transmembrane... | 0.004        |
|         | GO:0099132 | ATP hydrolysis coupled cation transmembr... | 0.004        |
|         | GO:0042168 | heme metabolic process                      | 0.004        |
|         | GO:0006101 | citrate metabolic process                   | 0.005        |
|         | GO:0016122 | xanthophyll metabolic process               | 0.006        |
|         | GO:0017004 | cytochrome complex assembly                 | 0.006        |
|         | GO:0046184 | aldehyde biosynthetic process               | 0.006        |
|         | GO:0006783 | heme biosynthetic process                   | 0.007        |
|         | GO:0010206 | photosystem II repair                       | 0.007        |
|         | GO:0005983 | starch catabolic process                    | 0.007        |
|         | GO:0006721 | terpenoid metabolic process                 | 0.007        |
|         | GO:0010143 | cutin biosynthetic process                  | 0.007        |
|         | GO:0046271 | phenylpropanoid catabolic process           | 0.007        |
|         | GO:0008652 | cellular amino acid biosynthetic process    | 0.008        |
|         | GO:0044036 | cell wall macromolecule metabolic proces... | 0.008        |
|         | GO:0046365 | monosaccharide catabolic process            | 0.008        |
|         | GO:0043467 | regulation of generation of precursor me... | 0.009        |
|         | GO:0015985 | energy coupled proton transport, down el... | 0.012        |
|         | GO:0015986 | ATP synthesis coupled proton transport      | 0.012        |
|         | GO:0032271 | regulation of protein polymerization        | 0.012        |
|         | GO:0009308 | amine metabolic process                     | 0.012        |
|         | GO:0044550 | secondary metabolite biosynthetic proces... | 0.012        |
|         | GO:0000272 | polysaccharide catabolic process            | 0.012        |
|         | GO:0018298 | protein-chromophore linkage                 | 0.012        |
|         | GO:0035336 | long-chain fatty-acyl-CoA metabolic proc... | 0.013        |
|         | GO:0015672 | monovalent inorganic cation transport       | 0.014        |
|         | GO:0009409 | response to cold                            | 0.014        |
|         | GO:0042214 | terpene metabolic process                   | 0.014        |
|         | GO:0046274 | lignin catabolic process                    | 0.016        |
|         | GO:0032544 | plastid translation                         | 0.016        |
|         | GO:0072350 | tricarboxylic acid metabolic process        | 0.017        |
|         | GO:0019318 | hexose metabolic process                    | 0.017        |

Continued on next page

| GO type | GO ID      | Description                                 | Adj. p-value |
|---------|------------|---------------------------------------------|--------------|
|         | GO:0007010 | cytoskeleton organization                   | 0.021        |
|         | GO:0016114 | terpenoid biosynthetic process              | 0.021        |
|         | GO:0030091 | protein repair                              | 0.021        |
|         | GO:0098660 | inorganic ion transmembrane transport       | 0.021        |
|         | GO:1901568 | fatty acid derivative metabolic process     | 0.021        |
|         | GO:0046185 | aldehyde catabolic process                  | 0.021        |
|         | GO:0043038 | amino acid activation                       | 0.022        |
|         | GO:0043039 | tRNA aminoacylation                         | 0.022        |
|         | GO:0010345 | suberin biosynthetic process                | 0.022        |
|         | GO:0016999 | antibiotic metabolic process                | 0.022        |
|         | GO:0017001 | antibiotic catabolic process                | 0.023        |
|         | GO:0044282 | small molecule catabolic process            | 0.023        |
|         | GO:0044247 | cellular polysaccharide catabolic proces... | 0.024        |
|         | GO:0035337 | fatty-acyl-CoA metabolic process            | 0.026        |
|         | GO:0009251 | glucan catabolic process                    | 0.028        |
|         | GO:0033865 | nucleoside bisphosphate metabolic proces... | 0.028        |
|         | GO:0033875 | ribonucleoside bisphosphate metabolic pr... | 0.028        |
|         | GO:0034032 | purine nucleoside bisphosphate metabolic... | 0.028        |
|         | GO:0019674 | NAD metabolic process                       | 0.029        |
|         | GO:0042435 | indole-containing compound biosynthetic ... | 0.029        |
|         | GO:0043244 | regulation of protein complex disassembl... | 0.031        |
|         | GO:1901615 | organic hydroxy compound metabolic proce... | 0.033        |
|         | GO:0030041 | actin filament polymerization               | 0.033        |
|         | GO:0030833 | regulation of actin filament polymerizat... | 0.033        |
|         | GO:0006743 | ubiquinone metabolic process                | 0.034        |
|         | GO:0006744 | ubiquinone biosynthetic process             | 0.034        |
|         | GO:0098662 | inorganic cation transmembrane transport    | 0.035        |
|         | GO:0008154 | actin polymerization or depolymerization    | 0.037        |
|         | GO:0009628 | response to abiotic stimulus                | 0.037        |
|         | GO:0030244 | cellulose biosynthetic process              | 0.041        |
|         | GO:0045492 | xylan biosynthetic process                  | 0.042        |
|         | GO:1903338 | regulation of cell wall organization or ... | 0.043        |
|         | GO:0009250 | glucan biosynthetic process                 | 0.045        |
|         | GO:0044249 | cellular biosynthetic process               | 0.045        |
|         | GO:0071482 | cellular response to light stimulus         | 0.045        |
|         | GO:1901617 | organic hydroxy compound biosynthetic pr... | 0.045        |
|         | GO:0009438 | methylglyoxal metabolic process             | 0.047        |
|         | GO:0042182 | ketone catabolic process                    | 0.047        |
|         | GO:0051596 | methylglyoxal catabolic process             | 0.047        |
|         | GO:0044038 | cell wall macromolecule biosynthetic pro... | 0.049        |
|         | GO:0070589 | cellular component macromolecule biosynt... | 0.049        |
|         | GO:0006812 | cation transport                            | 0.049        |
|         | GO:0070592 | cell wall polysaccharide biosynthetic pr... | 0.049        |
|         | GO:0006637 | acyl-CoA metabolic process                  | 0.051        |
|         | GO:0035383 | thioester metabolic process                 | 0.051        |
|         | GO:0048438 | floral whorl development                    | 0.051        |
|         | GO:0009416 | response to light stimulus                  | 0.054        |
|         | GO:0046486 | glycerolipid metabolic process              | 0.056        |
|         | GO:0080167 | response to karrikin                        | 0.056        |

Continued on next page

| GO type | GO ID      | Description                                 | Adj. p-value |
|---------|------------|---------------------------------------------|--------------|
|         | GO:0009058 | biosynthetic process                        | 0.058        |
|         | GO:0006595 | polyamine metabolic process                 | 0.059        |
|         | GO:0045489 | pectin biosynthetic process                 | 0.059        |
|         | GO:0008064 | regulation of actin polymerization or de... | 0.060        |
|         | GO:0010393 | galacturonan metabolic process              | 0.060        |
|         | GO:0030832 | regulation of actin filament length         | 0.060        |
|         | GO:0032956 | regulation of actin cytoskeleton organiz... | 0.060        |
|         | GO:0032970 | regulation of actin filament-based proce... | 0.060        |
|         | GO:0033500 | carbohydrate homeostasis                    | 0.060        |
|         | GO:0045488 | pectin metabolic process                    | 0.060        |
|         | GO:0072593 | reactive oxygen species metabolic proces... | 0.060        |
|         | GO:0110053 | regulation of actin filament organizatio... | 0.060        |
|         | GO:0006568 | tryptophan metabolic process                | 0.062        |
|         | GO:0006586 | indolalkylamine metabolic process           | 0.062        |
|         | GO:0008152 | metabolic process                           | 0.063        |
|         | GO:0048481 | plant ovule development                     | 0.063        |
|         | GO:0006089 | lactate metabolic process                   | 0.064        |
|         | GO:0006418 | tRNA aminoacylation for protein translat... | 0.064        |
|         | GO:0019243 | methylglyoxal catabolic process to D-lac... | 0.064        |
|         | GO:0019430 | removal of superoxide radicals              | 0.064        |
|         | GO:0061727 | methylglyoxal catabolic process to lacta... | 0.064        |
|         | GO:0071450 | cellular response to oxygen radical         | 0.064        |
|         | GO:0071451 | cellular response to superoxide             | 0.064        |
|         | GO:1902903 | regulation of supramolecular fiber organ... | 0.064        |
|         | GO:0042744 | hydrogen peroxide catabolic process         | 0.065        |
|         | GO:0009395 | phospholipid catabolic process              | 0.068        |
|         | GO:0000038 | very long-chain fatty acid metabolic pro... | 0.070        |
|         | GO:0006771 | riboflavin metabolic process                | 0.070        |
|         | GO:0009231 | riboflavin biosynthetic process             | 0.070        |
|         | GO:0042727 | flavin-containing compound biosynthetic ... | 0.070        |
|         | GO:0030243 | cellulose metabolic process                 | 0.072        |
|         | GO:0006694 | steroid biosynthetic process                | 0.072        |
|         | GO:0010496 | intercellular transport                     | 0.074        |
|         | GO:1901607 | alpha-amino acid biosynthetic process       | 0.075        |
|         | GO:0019682 | glyceraldehyde-3-phosphate metabolic pro... | 0.075        |
|         | GO:0007015 | actin filament organization                 | 0.076        |
|         | GO:0043254 | regulation of protein complex assembly      | 0.082        |
|         | GO:0051261 | protein depolymerization                    | 0.085        |
|         | GO:0071478 | cellular response to radiation              | 0.085        |
|         | GO:0046364 | monosaccharide biosynthetic process         | 0.086        |
|         | GO:0006793 | phosphorus metabolic process                | 0.090        |
|         | GO:0022904 | respiratory electron transport chain        | 0.092        |
|         | GO:0042558 | pteridine-containing compound metabolic ... | 0.092        |
|         | GO:1901576 | organic substance biosynthetic process      | 0.092        |
|         | GO:0043624 | cellular protein complex disassembly        | 0.097        |
|         | GO:0035670 | plant-type ovary development                | 0.099        |
|         | GO:0006119 | oxidative phosphorylation                   | 0.100        |
|         | GO:0042773 | ATP synthesis coupled electron transport    | 0.100        |
|         | GO:0031977 | thylakoid lumen                             | 0.000        |

Continued on next page



| GO type | GO ID      | Description                                 | Adj. p-value |
|---------|------------|---------------------------------------------|--------------|
|         | GO:0009521 | photosystem                                 | 0.000        |
|         | GO:0044430 | cytoskeletal part                           | 0.000        |
|         | GO:0005576 | extracellular region                        | 0.000        |
|         | GO:0044429 | mitochondrial part                          | 0.000        |
|         | GO:0005875 | microtubule associated complex              | 0.000        |
|         | GO:0005739 | mitochondrion                               | 0.000        |
|         | GO:0005740 | mitochondrial envelope                      | 0.000        |
|         | GO:0016469 | proton-transporting two-sector ATPase co... | 0.000        |
|         | GO:0005743 | mitochondrial inner membrane                | 0.000        |
|         | GO:1990204 | oxidoreductase complex                      | 0.000        |
|         | GO:0031969 | chloroplast membrane                        | 0.000        |
|         | GO:0005874 | microtubule                                 | 0.000        |
|         | GO:0044455 | mitochondrial membrane part                 | 0.000        |
|         | GO:0070469 | respiratory chain                           | 0.000        |
|         | GO:0098803 | respiratory chain complex                   | 0.000        |
|         | GO:0005618 | cell wall                                   | 0.000        |
|         | GO:0005746 | mitochondrial respiratory chain             | 0.000        |
|         | GO:0009528 | plastid inner membrane                      | 0.000        |
|         | GO:0033176 | proton-transporting V-type ATPase comple... | 0.000        |
|         | GO:0005753 | mitochondrial proton-transporting ATP sy... | 0.001        |
|         | GO:0046658 | anchored component of plasma membrane       | 0.001        |
|         | GO:0009295 | nucleoid                                    | 0.001        |
|         | GO:0098798 | mitochondrial protein complex               | 0.001        |
|         | GO:0030964 | NADH dehydrogenase complex                  | 0.001        |
|         | GO:0045271 | respiratory chain complex I                 | 0.001        |
|         | GO:0033180 | proton-transporting V-type ATPase, V1 do... | 0.001        |
|         | GO:0005623 | cell                                        | 0.001        |
|         | GO:0044464 | cell part                                   | 0.001        |
|         | GO:0005747 | mitochondrial respiratory chain complex ... | 0.001        |
|         | GO:0009706 | chloroplast inner membrane                  | 0.001        |
|         | GO:0016020 | membrane                                    | 0.002        |
|         | GO:0044424 | intracellular part                          | 0.002        |
|         | GO:0009654 | photosystem II oxygen evolving complex      | 0.002        |
|         | GO:0055028 | cortical microtubule                        | 0.002        |
|         | GO:0042646 | plastid nucleoid                            | 0.006        |
|         | GO:0009524 | phragmoplast                                | 0.013        |
|         | GO:0009505 | plant-type cell wall                        | 0.017        |
|         | GO:0045261 | proton-transporting ATP synthase complex... | 0.042        |
|         | GO:0033177 | proton-transporting two-sector ATPase co... | 0.056        |
|         | GO:0000229 | cytoplasmic chromosome                      | 0.073        |
|         | GO:0009508 | plastid chromosome                          | 0.100        |
|         | GO:0016787 | hydrolase activity                          | 0.000        |
|         | GO:0016491 | oxidoreductase activity                     | 0.000        |
|         | GO:0016829 | lyase activity                              | 0.000        |
|         | GO:0003774 | motor activity                              | 0.000        |
|         | GO:0016788 | hydrolase activity, acting on ester bond... | 0.000        |
|         | GO:0048037 | cofactor binding                            | 0.000        |
|         | GO:0016655 | oxidoreductase activity, acting on NAD(P... | 0.000        |
|         | GO:0016651 | oxidoreductase activity, acting on NAD(P... | 0.000        |

Continued on next page

| GO type | GO ID      | Description                                 | Adj. p-value |
|---------|------------|---------------------------------------------|--------------|
|         | GO:0050662 | coenzyme binding                            | 0.000        |
|         | GO:0016791 | phosphatase activity                        | 0.000        |
|         | GO:0003954 | NADH dehydrogenase activity                 | 0.001        |
|         | GO:0004553 | hydrolase activity, hydrolyzing O-glycos... | 0.001        |
|         | GO:0016887 | ATPase activity                             | 0.001        |
|         | GO:0008236 | serine-type peptidase activity              | 0.002        |
|         | GO:0017171 | serine hydrolase activity                   | 0.002        |
|         | GO:0016776 | phosphotransferase activity, phosphate g... | 0.002        |
|         | GO:0016778 | diphosphotransferase activity               | 0.002        |
|         | GO:0016830 | carbon-carbon lyase activity                | 0.002        |
|         | GO:0016840 | carbon-nitrogen lyase activity              | 0.002        |
|         | GO:0016462 | pyrophosphatase activity                    | 0.002        |
|         | GO:0008137 | NADH dehydrogenase (ubiquinone) activity    | 0.003        |
|         | GO:0016853 | isomerase activity                          | 0.003        |
|         | GO:0050136 | NADH dehydrogenase (quinone) activity       | 0.003        |
|         | GO:0050308 | sugar-phosphatase activity                  | 0.003        |
|         | GO:0016818 | hydrolase activity, acting on acid anhyd... | 0.004        |
|         | GO:0016413 | O-acetyltransferase activity                | 0.004        |
|         | GO:0019203 | carbohydrate phosphatase activity           | 0.004        |
|         | GO:0016615 | malate dehydrogenase activity               | 0.004        |
|         | GO:0016616 | oxidoreductase activity, acting on the C... | 0.004        |
|         | GO:0016838 | carbon-oxygen lyase activity, acting on ... | 0.005        |
|         | GO:0016684 | oxidoreductase activity, acting on perox... | 0.005        |
|         | GO:0016866 | intramolecular transferase activity         | 0.006        |
|         | GO:0046933 | proton-transporting ATP synthase activit... | 0.006        |
|         | GO:0016620 | oxidoreductase activity, acting on the a... | 0.008        |
|         | GO:0042349 | guiding stereospecific synthesis activit... | 0.008        |
|         | GO:0046961 | proton-transporting ATPase activity, rot... | 0.009        |
|         | GO:0010333 | terpene synthase activity                   | 0.009        |
|         | GO:0015399 | primary active transmembrane transporter... | 0.009        |
|         | GO:0015405 | P-P-bond-hydrolysis-driven transmembrane... | 0.009        |
|         | GO:0016759 | cellulose synthase activity                 | 0.009        |
|         | GO:0016760 | cellulose synthase (UDP-forming) activit... | 0.009        |
|         | GO:0016762 | xyloglucan:xyloglucosyl transferase acti... | 0.010        |
|         | GO:0016814 | hydrolase activity, acting on carbon-nit... | 0.010        |
|         | GO:0080019 | fatty-acyl-CoA reductase (alcohol-formin... | 0.011        |
|         | GO:0016836 | hydro-lyase activity                        | 0.011        |
|         | GO:0036442 | proton-exporting ATPase activity            | 0.011        |
|         | GO:0070011 | peptidase activity, acting on L-amino ac... | 0.011        |
|         | GO:0042626 | ATPase activity, coupled to transmembran... | 0.012        |
|         | GO:0003993 | acid phosphatase activity                   | 0.013        |
|         | GO:0004601 | peroxidase activity                         | 0.013        |
|         | GO:0050660 | flavin adenine dinucleotide binding         | 0.013        |
|         | GO:0003779 | actin binding                               | 0.013        |
|         | GO:0016741 | transferase activity, transferring one-c... | 0.014        |
|         | GO:0016903 | oxidoreductase activity, acting on the a... | 0.014        |
|         | GO:0019205 | nucleobase-containing compound kinase ac... | 0.016        |
|         | GO:0016874 | ligase activity                             | 0.018        |
|         | GO:0042623 | ATPase activity, coupled                    | 0.018        |

Continued on next page

| GO type | GO ID      | Description                                 | Adj. p-value |
|---------|------------|---------------------------------------------|--------------|
|         | GO:0008233 | peptidase activity                          | 0.021        |
|         | GO:0052716 | hydroquinone:oxygen oxidoreductase activ... | 0.021        |
|         | GO:0016765 | transferase activity, transferring alkyl... | 0.021        |
|         | GO:0043492 | ATPase activity, coupled to movement of ... | 0.021        |
|         | GO:0140101 | catalytic activity, acting on a tRNA        | 0.021        |
|         | GO:0043022 | ribosome binding                            | 0.024        |
|         | GO:0008168 | methyltransferase activity                  | 0.025        |
|         | GO:0016717 | oxidoreductase activity, acting on paire... | 0.025        |
|         | GO:0016861 | intramolecular oxidoreductase activity, ... | 0.025        |
|         | GO:0051537 | 2 iron, 2 sulfur cluster binding            | 0.025        |
|         | GO:0004175 | endopeptidase activity                      | 0.028        |
|         | GO:0004743 | pyruvate kinase activity                    | 0.028        |
|         | GO:0030955 | potassium ion binding                       | 0.028        |
|         | GO:0031420 | alkali metal ion binding                    | 0.028        |
|         | GO:0031409 | pigment binding                             | 0.029        |
|         | GO:0019104 | DNA N-glycosylase activity                  | 0.030        |
|         | GO:0016868 | intramolecular transferase activity, pho... | 0.038        |
|         | GO:0016799 | hydrolase activity, hydrolyzing N-glycos... | 0.039        |
|         | GO:0050661 | NADP binding                                | 0.040        |
|         | GO:0052689 | carboxylic ester hydrolase activity         | 0.041        |
|         | GO:0004812 | aminoacyl-tRNA ligase activity              | 0.046        |
|         | GO:0016875 | ligase activity, forming carbon-oxygen b... | 0.046        |
|         | GO:0019829 | cation-transporting ATPase activity         | 0.046        |
|         | GO:0022853 | active ion transmembrane transporter act... | 0.046        |
|         | GO:0042625 | ATPase coupled ion transmembrane transpo... | 0.046        |
|         | GO:0046556 | alpha-L-arabinofuranosidase activity        | 0.049        |
|         | GO:0051015 | actin filament binding                      | 0.056        |
|         | GO:0070008 | serine-type exopeptidase activity           | 0.056        |
|         | GO:0016405 | CoA-ligase activity                         | 0.060        |
|         | GO:0016878 | acid-thiol ligase activity                  | 0.060        |
|         | GO:0004185 | serine-type carboxypeptidase activity       | 0.061        |
|         | GO:2001070 | starch binding                              | 0.066        |
|         | GO:0033764 | steroid dehydrogenase activity, acting o... | 0.072        |
|         | GO:0019238 | cyclohydrolase activity                     | 0.076        |
|         | GO:0004659 | prenyltransferase activity                  | 0.081        |
|         | GO:0002161 | aminoacyl-tRNA editing activity             | 0.082        |
|         | GO:0051087 | chaperone binding                           | 0.098        |

#### 4.2.8 Leaf - Postflowering - Cluster 8

| GO type | GO ID      | Description                                 | Adj. p-value |
|---------|------------|---------------------------------------------|--------------|
|         | GO:0016071 | mRNA metabolic process                      | 0.000        |
|         | GO:0008380 | RNA splicing                                | 0.000        |
|         | GO:0022618 | ribonucleoprotein complex assembly          | 0.000        |
|         | GO:0042255 | ribosome assembly                           | 0.000        |
|         | GO:0051171 | regulation of nitrogen compound metaboli... | 0.000        |
|         | GO:0080090 | regulation of primary metabolic process     | 0.000        |
|         | GO:0090501 | RNA phosphodiester bond hydrolysis          | 0.000        |
|         | GO:0010556 | regulation of macromolecule biosynthetic... | 0.001        |
|         | GO:0051252 | regulation of RNA metabolic process         | 0.001        |
|         | GO:0097659 | nucleic acid-templated transcription        | 0.001        |
|         | GO:2000112 | regulation of cellular macromolecule bio... | 0.001        |
|         | GO:0031326 | regulation of cellular biosynthetic proc... | 0.002        |
|         | GO:1903506 | regulation of nucleic acid-templated tra... | 0.003        |
|         | GO:2001141 | regulation of RNA biosynthetic process      | 0.003        |
|         | GO:0006355 | regulation of transcription, DNA-templat... | 0.003        |
|         | GO:0009889 | regulation of biosynthetic process          | 0.003        |
|         | GO:0019941 | modification-dependent protein catabolic... | 0.004        |
|         | GO:0016074 | snoRNA metabolic process                    | 0.004        |
|         | GO:0043144 | snoRNA processing                           | 0.004        |
|         | GO:1900864 | mitochondrial RNA modification              | 0.004        |
|         | GO:0006511 | ubiquitin-dependent protein catabolic pr... | 0.008        |
|         | GO:0006749 | glutathione metabolic process               | 0.009        |
|         | GO:0000027 | ribosomal large subunit assembly            | 0.009        |
|         | GO:0006333 | chromatin assembly or disassembly           | 0.013        |
|         | GO:0031497 | chromatin assembly                          | 0.018        |
| BP      | GO:0090502 | RNA phosphodiester bond hydrolysis, endo... | 0.018        |
|         | GO:0070925 | organelle assembly                          | 0.027        |
|         | GO:0000959 | mitochondrial RNA metabolic process         | 0.030        |
|         | GO:0006323 | DNA packaging                               | 0.030        |
|         | GO:0006334 | nucleosome assembly                         | 0.030        |
|         | GO:0010431 | seed maturation                             | 0.031        |
|         | GO:0046113 | nucleobase catabolic process                | 0.031        |
|         | GO:0044265 | cellular macromolecule catabolic process    | 0.031        |
|         | GO:0000463 | maturation of LSU-rRNA from tricistronic... | 0.035        |
|         | GO:0005996 | monosaccharide metabolic process            | 0.041        |
|         | GO:0006457 | protein folding                             | 0.045        |
|         | GO:0034728 | nucleosome organization                     | 0.045        |
|         | GO:1904659 | glucose transmembrane transport             | 0.050        |
|         | GO:0015749 | monosaccharide transmembrane transport      | 0.052        |
|         | GO:0080156 | mitochondrial mRNA modification             | 0.052        |
|         | GO:0046149 | pigment catabolic process                   | 0.058        |
|         | GO:0044257 | cellular protein catabolic process          | 0.058        |
|         | GO:0051603 | proteolysis involved in cellular protein... | 0.059        |
|         | GO:0008645 | hexose transmembrane transport              | 0.070        |
|         | GO:0015996 | chlorophyll catabolic process               | 0.070        |
|         | GO:0015850 | organic hydroxy compound transport          | 0.071        |

Continued on next page

| GO type | GO ID      | Description                                 | Adj. p-value |
|---------|------------|---------------------------------------------|--------------|
|         | GO:0019748 | secondary metabolic process                 | 0.073        |
|         | GO:0006560 | proline metabolic process                   | 0.085        |
|         | GO:0000380 | alternative mRNA splicing, via spliceoso... | 0.085        |
|         | GO:0046323 | glucose import                              | 0.091        |
|         | GO:0006575 | cellular modified amino acid metabolic p... | 0.097        |
|         | GO:0005681 | spliceosomal complex                        | 0.000        |
|         | GO:0005829 | cytosol                                     | 0.000        |
|         | GO:0030532 | small nuclear ribonucleoprotein complex     | 0.001        |
|         | GO:0097525 | spliceosomal snRNP complex                  | 0.001        |
|         | GO:0120114 | Sm-like protein family complex              | 0.001        |
|         | GO:0005684 | U2-type spliceosomal complex                | 0.005        |
|         | GO:0000785 | chromatin                                   | 0.005        |
|         | GO:0099023 | tethering complex                           | 0.005        |
|         | GO:0005686 | U2 snRNP                                    | 0.006        |
|         | GO:0016607 | nuclear speck                               | 0.008        |
| CC      | GO:0000786 | nucleosome                                  | 0.010        |
|         | GO:0005689 | U12-type spliceosomal complex               | 0.011        |
|         | GO:0044815 | DNA packaging complex                       | 0.023        |
|         | GO:0017119 | Golgi transport complex                     | 0.025        |
|         | GO:0000315 | organellar large ribosomal subunit          | 0.027        |
|         | GO:0005762 | mitochondrial large ribosomal subunit       | 0.027        |
|         | GO:0055029 | nuclear DNA-directed RNA polymerase comp... | 0.034        |
|         | GO:0000428 | DNA-directed RNA polymerase complex         | 0.042        |
|         | GO:0030880 | RNA polymerase complex                      | 0.042        |
|         | GO:0030118 | clathrin coat                               | 0.061        |
|         | GO:0071011 | precatalytic spliceosome                    | 0.100        |
|         | GO:0003676 | nucleic acid binding                        | 0.000        |
|         | GO:0004497 | monooxygenase activity                      | 0.006        |
|         | GO:0046914 | transition metal ion binding                | 0.036        |
|         | GO:0043565 | sequence-specific DNA binding               | 0.036        |
| MF      | GO:0016705 | oxidoreductase activity, acting on paire... | 0.042        |
|         | GO:0016709 | oxidoreductase activity, acting on paire... | 0.082        |
|         | GO:0003677 | DNA binding                                 | 0.085        |
|         | GO:0004364 | glutathione transferase activity            | 0.085        |
|         | GO:0035251 | UDP-glucosyltransferase activity            | 0.085        |

#### 4.2.9 Leaf - Postflowering - Cluster 9

| GO type | GO ID      | Description                                 | Adj. p-value |
|---------|------------|---------------------------------------------|--------------|
|         | GO:0019684 | photosynthesis, light reaction              | 0.000        |
|         | GO:0006091 | generation of precursor metabolites and ... | 0.000        |
|         | GO:0044281 | small molecule metabolic process            | 0.000        |
|         | GO:0044283 | small molecule biosynthetic process         | 0.000        |
|         | GO:0051188 | cofactor biosynthetic process               | 0.000        |
|         | GO:0006796 | phosphate-containing compound metabolic ... | 0.000        |
|         | GO:0017144 | drug metabolic process                      | 0.000        |
|         | GO:0008299 | isoprenoid biosynthetic process             | 0.000        |
|         | GO:0006629 | lipid metabolic process                     | 0.000        |
|         | GO:0016053 | organic acid biosynthetic process           | 0.000        |
|         | GO:0046394 | carboxylic acid biosynthetic process        | 0.000        |
|         | GO:0006732 | coenzyme metabolic process                  | 0.000        |
|         | GO:0005975 | carbohydrate metabolic process              | 0.000        |
|         | GO:0005976 | polysaccharide metabolic process            | 0.000        |
|         | GO:0009108 | coenzyme biosynthetic process               | 0.000        |
|         | GO:0016999 | antibiotic metabolic process                | 0.000        |
|         | GO:0009150 | purine ribonucleotide metabolic process     | 0.000        |
|         | GO:0016310 | phosphorylation                             | 0.000        |
|         | GO:0044262 | cellular carbohydrate metabolic process     | 0.000        |
|         | GO:0016114 | terpenoid biosynthetic process              | 0.000        |
|         | GO:0009165 | nucleotide biosynthetic process             | 0.000        |
|         | GO:0016052 | carbohydrate catabolic process              | 0.000        |
|         | GO:1901293 | nucleoside phosphate biosynthetic proces... | 0.000        |
|         | GO:0009123 | nucleoside monophosphate metabolic proce... | 0.000        |
|         | GO:0009110 | vitamin biosynthetic process                | 0.000        |
|         | GO:0009073 | aromatic amino acid family biosynthetic ... | 0.000        |
|         | GO:0009834 | plant-type secondary cell wall biogenesi... | 0.001        |
|         | GO:0046434 | organophosphate catabolic process           | 0.001        |
|         | GO:0009832 | plant-type cell wall biogenesis             | 0.002        |
|         | GO:0010383 | cell wall polysaccharide metabolic proce... | 0.002        |
|         | GO:0046854 | phosphatidylinositol phosphorylation        | 0.002        |
|         | GO:0072525 | pyridine-containing compound biosyntheti... | 0.002        |
|         | GO:0033692 | cellular polysaccharide biosynthetic pro... | 0.003        |
|         | GO:0048438 | floral whorl development                    | 0.003        |
|         | GO:0051187 | cofactor catabolic process                  | 0.003        |
|         | GO:0071482 | cellular response to light stimulus         | 0.003        |
|         | GO:0044036 | cell wall macromolecule metabolic proces... | 0.003        |
|         | GO:0055086 | nucleobase-containing small molecule met... | 0.003        |
|         | GO:0009808 | lignin metabolic process                    | 0.003        |
|         | GO:0016051 | carbohydrate biosynthetic process           | 0.003        |
|         | GO:0048440 | carpel development                          | 0.003        |
|         | GO:0046939 | nucleotide phosphorylation                  | 0.003        |
|         | GO:0090407 | organophosphate biosynthetic process        | 0.004        |
|         | GO:0072524 | pyridine-containing compound metabolic p... | 0.004        |
|         | GO:0009645 | response to low light intensity stimulus    | 0.004        |
|         | GO:0006165 | nucleoside diphosphate phosphorylation      | 0.005        |

Continued on next page

| GO type | GO ID      | Description                                 | Adj. p-value |
|---------|------------|---------------------------------------------|--------------|
|         | GO:0006733 | oxidoreduction coenzyme metabolic proces... | 0.005        |
|         | GO:0046834 | lipid phosphorylation                       | 0.005        |
|         | GO:0034637 | cellular carbohydrate biosynthetic proce... | 0.005        |
|         | GO:0006090 | pyruvate metabolic process                  | 0.005        |
|         | GO:0007017 | microtubule-based process                   | 0.006        |
|         | GO:0019359 | nicotinamide nucleotide biosynthetic pro... | 0.006        |
|         | GO:0048467 | gynoecium development                       | 0.006        |
|         | GO:1901661 | quinone metabolic process                   | 0.006        |
|         | GO:1901663 | quinone biosynthetic process                | 0.006        |
|         | GO:0006558 | L-phenylalanine metabolic process           | 0.007        |
|         | GO:1902221 | erythrose 4-phosphate/phosphoenolpyruvat... | 0.007        |
|         | GO:0009074 | aromatic amino acid family catabolic pro... | 0.007        |
|         | GO:0009809 | lignin biosynthetic process                 | 0.007        |
|         | GO:0046496 | nicotinamide nucleotide metabolic proces... | 0.008        |
|         | GO:0010206 | photosystem II repair                       | 0.008        |
|         | GO:0010410 | hemicellulose metabolic process             | 0.008        |
|         | GO:0019363 | pyridine nucleotide biosynthetic process    | 0.008        |
|         | GO:0035670 | plant-type ovary development                | 0.009        |
|         | GO:0009166 | nucleotide catabolic process                | 0.009        |
|         | GO:0010109 | regulation of photosynthesis                | 0.009        |
|         | GO:0032787 | monocarboxylic acid metabolic process       | 0.009        |
|         | GO:0019362 | pyridine nucleotide metabolic process       | 0.010        |
|         | GO:0035336 | long-chain fatty-acyl-CoA metabolic proc... | 0.010        |
|         | GO:1901135 | carbohydrate derivative metabolic proces... | 0.010        |
|         | GO:0009773 | photosynthetic electron transport in pho... | 0.011        |
|         | GO:0015985 | energy coupled proton transport, down el... | 0.011        |
|         | GO:0015986 | ATP synthesis coupled proton transport      | 0.011        |
|         | GO:0009314 | response to radiation                       | 0.011        |
|         | GO:0042181 | ketone biosynthetic process                 | 0.011        |
|         | GO:0048481 | plant ovule development                     | 0.011        |
|         | GO:0071478 | cellular response to radiation              | 0.012        |
|         | GO:1901292 | nucleoside phosphate catabolic process      | 0.013        |
|         | GO:0042168 | heme metabolic process                      | 0.013        |
|         | GO:0006096 | glycolytic process                          | 0.013        |
|         | GO:0006757 | ATP generation from ADP                     | 0.013        |
|         | GO:0009135 | purine nucleoside diphosphate metabolic ... | 0.013        |
|         | GO:0009179 | purine ribonucleoside diphosphate metabo... | 0.013        |
|         | GO:0009185 | ribonucleoside diphosphate metabolic pro... | 0.013        |
|         | GO:0042866 | pyruvate biosynthetic process               | 0.013        |
|         | GO:0046031 | ADP metabolic process                       | 0.013        |
|         | GO:0009132 | nucleoside diphosphate metabolic process    | 0.013        |
|         | GO:0009416 | response to light stimulus                  | 0.014        |
|         | GO:0097435 | supramolecular fiber organization           | 0.015        |
|         | GO:0006520 | cellular amino acid metabolic process       | 0.016        |
|         | GO:0009308 | amine metabolic process                     | 0.016        |
|         | GO:0016122 | xanthophyll metabolic process               | 0.017        |
|         | GO:0006783 | heme biosynthetic process                   | 0.018        |
|         | GO:0042214 | terpene metabolic process                   | 0.019        |
|         | GO:0006576 | cellular biogenic amine metabolic proces... | 0.019        |

Continued on next page

| GO type | GO ID      | Description                                 | Adj. p-value |
|---------|------------|---------------------------------------------|--------------|
|         | GO:0042180 | cellular ketone metabolic process           | 0.019        |
|         | GO:0043467 | regulation of generation of precursor me... | 0.019        |
|         | GO:0010103 | stomatal complex morphogenesis              | 0.020        |
|         | GO:0071483 | cellular response to blue light             | 0.020        |
|         | GO:0098754 | detoxification                              | 0.020        |
|         | GO:0006767 | water-soluble vitamin metabolic process     | 0.020        |
|         | GO:1901568 | fatty acid derivative metabolic process     | 0.020        |
|         | GO:0010118 | stomatal movement                           | 0.020        |
|         | GO:0030244 | cellulose biosynthetic process              | 0.020        |
|         | GO:0000272 | polysaccharide catabolic process            | 0.021        |
|         | GO:0042435 | indole-containing compound biosynthetic ... | 0.021        |
|         | GO:2000652 | regulation of secondary cell wall biogen... | 0.021        |
|         | GO:0009250 | glucan biosynthetic process                 | 0.022        |
|         | GO:1901617 | organic hydroxy compound biosynthetic pr... | 0.028        |
|         | GO:0035337 | fatty-acyl-CoA metabolic process            | 0.028        |
|         | GO:0000038 | very long-chain fatty acid metabolic pro... | 0.029        |
|         | GO:0007015 | actin filament organization                 | 0.029        |
|         | GO:0017004 | cytochrome complex assembly                 | 0.031        |
|         | GO:0034220 | ion transmembrane transport                 | 0.031        |
|         | GO:0006637 | acyl-CoA metabolic process                  | 0.034        |
|         | GO:0035383 | thioester metabolic process                 | 0.034        |
|         | GO:0071214 | cellular response to abiotic stimulus       | 0.034        |
|         | GO:0104004 | cellular response to environmental stimu... | 0.034        |
|         | GO:0030243 | cellulose metabolic process                 | 0.034        |
|         | GO:0032544 | plastid translation                         | 0.035        |
|         | GO:0042364 | water-soluble vitamin biosynthetic proce... | 0.036        |
|         | GO:0009789 | positive regulation of abscisic acid-act... | 0.036        |
|         | GO:1901421 | positive regulation of response to alcoh... | 0.036        |
|         | GO:1905959 | positive regulation of cellular response... | 0.036        |
|         | GO:1901615 | organic hydroxy compound metabolic proce... | 0.038        |
|         | GO:0005983 | starch catabolic process                    | 0.038        |
|         | GO:0015672 | monovalent inorganic cation transport       | 0.040        |
|         | GO:0043648 | dicarboxylic acid metabolic process         | 0.041        |
|         | GO:0008652 | cellular amino acid biosynthetic process    | 0.041        |
|         | GO:0046486 | glycerolipid metabolic process              | 0.042        |
|         | GO:0042548 | regulation of photosynthesis, light reac... | 0.044        |
|         | GO:1902600 | proton transmembrane transport              | 0.045        |
|         | GO:0046364 | monosaccharide biosynthetic process         | 0.048        |
|         | GO:0000162 | tryptophan biosynthetic process             | 0.049        |
|         | GO:0046219 | indolalkylamine biosynthetic process        | 0.049        |
|         | GO:0030036 | actin cytoskeleton organization             | 0.050        |
|         | GO:0044275 | cellular carbohydrate catabolic process     | 0.050        |
|         | GO:0009637 | response to blue light                      | 0.050        |
|         | GO:0046184 | aldehyde biosynthetic process               | 0.050        |
|         | GO:0010143 | cutin biosynthetic process                  | 0.051        |
|         | GO:0006468 | protein phosphorylation                     | 0.051        |
|         | GO:0030029 | actin filament-based process                | 0.052        |
|         | GO:0043038 | amino acid activation                       | 0.052        |
|         | GO:0043039 | tRNA aminoacylation                         | 0.052        |

Continued on next page



| GO type | GO ID      | Description                                 | Adj. p-value |
|---------|------------|---------------------------------------------|--------------|
|         | GO:0046365 | monosaccharide catabolic process            | 0.052        |
|         | GO:0022604 | regulation of cell morphogenesis            | 0.055        |
|         | GO:0009642 | response to light intensity                 | 0.058        |
|         | GO:0006775 | fat-soluble vitamin metabolic process       | 0.061        |
|         | GO:0010189 | vitamin E biosynthetic process              | 0.061        |
|         | GO:0042360 | vitamin E metabolic process                 | 0.061        |
|         | GO:0042362 | fat-soluble vitamin biosynthetic process    | 0.061        |
|         | GO:0042726 | flavin-containing compound metabolic pro... | 0.061        |
|         | GO:0009943 | adaxial/abaxial axis specification          | 0.067        |
|         | GO:0009944 | polarity specification of adaxial/abaxia... | 0.067        |
|         | GO:0009741 | response to brassinosteroid                 | 0.067        |
|         | GO:0034754 | cellular hormone metabolic process          | 0.067        |
|         | GO:0010119 | regulation of stomatal movement             | 0.069        |
|         | GO:0010218 | response to far red light                   | 0.069        |
|         | GO:1901401 | regulation of tetrapyrrole metabolic pro... | 0.073        |
|         | GO:0010345 | suberin biosynthetic process                | 0.079        |
|         | GO:0030091 | protein repair                              | 0.079        |
|         | GO:1901463 | regulation of tetrapyrrole biosynthetic ... | 0.079        |
|         | GO:0006568 | tryptophan metabolic process                | 0.081        |
|         | GO:0006586 | indolalkylamine metabolic process           | 0.081        |
|         | GO:0080167 | response to karrikin                        | 0.082        |
|         | GO:0051273 | beta-glucan metabolic process               | 0.087        |
|         | GO:0009095 | aromatic amino acid family biosynthetic ... | 0.087        |
|         | GO:0009606 | tropism                                     | 0.089        |
|         | GO:0051274 | beta-glucan biosynthetic process            | 0.089        |
|         | GO:0009958 | positive gravitropism                       | 0.090        |
|         | GO:1903409 | reactive oxygen species biosynthetic pro... | 0.090        |
|         | GO:0006418 | tRNA aminoacylation for protein translat... | 0.095        |
|         | GO:0044550 | secondary metabolite biosynthetic proces... | 0.096        |
|         | GO:0009629 | response to gravity                         | 0.097        |
|         | GO:0031977 | thylakoid lumen                             | 0.000        |
|         | GO:0009521 | photosystem                                 | 0.000        |
|         | GO:0016020 | membrane                                    | 0.000        |
|         | GO:0005856 | cytoskeleton                                | 0.000        |
|         | GO:0044430 | cytoskeletal part                           | 0.000        |
|         | GO:0010319 | stromule                                    | 0.002        |
|         | GO:0009505 | plant-type cell wall                        | 0.003        |
|         | GO:0045259 | proton-transporting ATP synthase complex    | 0.005        |
|         | GO:0030863 | cortical cytoskeleton                       | 0.007        |
|         | GO:0030981 | cortical microtubule cytoskeleton           | 0.007        |
|         | GO:0009654 | photosystem II oxygen evolving complex      | 0.007        |
|         | GO:0031225 | anchored component of membrane              | 0.010        |
|         | GO:0046658 | anchored component of plasma membrane       | 0.011        |
|         | GO:0099080 | supramolecular complex                      | 0.015        |
| CC      | GO:0099081 | supramolecular polymer                      | 0.015        |
|         | GO:0099512 | supramolecular fiber                        | 0.015        |
|         | GO:0099513 | polymeric cytoskeletal fiber                | 0.015        |
|         | GO:1990204 | oxidoreductase complex                      | 0.016        |
|         | GO:0005874 | microtubule                                 | 0.018        |

Continued on next page

| GO type | GO ID      | Description                                 | Adj. p-value |
|---------|------------|---------------------------------------------|--------------|
|         | GO:0055028 | cortical microtubule                        | 0.019        |
|         | GO:0019866 | organelle inner membrane                    | 0.025        |
|         | GO:0042170 | plastid membrane                            | 0.025        |
|         | GO:0044425 | membrane part                               | 0.025        |
|         | GO:0005881 | cytoplasmic microtubule                     | 0.030        |
|         | GO:0031969 | chloroplast membrane                        | 0.038        |
|         | GO:0045261 | proton-transporting ATP synthase complex... | 0.058        |
|         | GO:0042575 | DNA polymerase complex                      | 0.062        |
|         | GO:0005740 | mitochondrial envelope                      | 0.066        |
|         | GO:0098796 | membrane protein complex                    | 0.073        |
|         | GO:0016787 | hydrolase activity                          | 0.000        |
|         | GO:0016829 | lyase activity                              | 0.000        |
|         | GO:0016491 | oxidoreductase activity                     | 0.000        |
|         | GO:0016209 | antioxidant activity                        | 0.000        |
|         | GO:0008144 | drug binding                                | 0.000        |
|         | GO:0016791 | phosphatase activity                        | 0.000        |
|         | GO:0042578 | phosphoric ester hydrolase activity         | 0.000        |
|         | GO:0016838 | carbon-oxygen lyase activity, acting on ... | 0.000        |
|         | GO:0016773 | phosphotransferase activity, alcohol gro... | 0.000        |
|         | GO:0016788 | hydrolase activity, acting on ester bond... | 0.000        |
|         | GO:0050662 | coenzyme binding                            | 0.000        |
|         | GO:0016835 | carbon-oxygen lyase activity                | 0.000        |
|         | GO:0004672 | protein kinase activity                     | 0.002        |
|         | GO:0046933 | proton-transporting ATP synthase activit... | 0.002        |
|         | GO:0043167 | ion binding                                 | 0.002        |
|         | GO:0042626 | ATPase activity, coupled to transmembran... | 0.002        |
|         | GO:0016746 | transferase activity, transferring acyl ... | 0.003        |
|         | GO:0015399 | primary active transmembrane transporter... | 0.003        |
|         | GO:0015405 | P-P-bond-hydrolysis-driven transmembrane... | 0.003        |
|         | GO:0003779 | actin binding                               | 0.003        |
|         | GO:0016830 | carbon-carbon lyase activity                | 0.003        |
|         | GO:0016747 | transferase activity, transferring acyl ... | 0.004        |
|         | GO:0005215 | transporter activity                        | 0.004        |
|         | GO:0022857 | transmembrane transporter activity          | 0.004        |
|         | GO:0043492 | ATPase activity, coupled to movement of ... | 0.004        |
|         | GO:0050308 | sugar-phosphatase activity                  | 0.006        |
|         | GO:0005216 | ion channel activity                        | 0.006        |
|         | GO:0080019 | fatty-acyl-CoA reductase (alcohol-formin... | 0.006        |
|         | GO:0019203 | carbohydrate phosphatase activity           | 0.007        |
|         | GO:0003993 | acid phosphatase activity                   | 0.010        |
|         | GO:0008574 | ATP-dependent microtubule motor activity... | 0.010        |
|         | GO:1990939 | ATP-dependent microtubule motor activity    | 0.010        |
|         | GO:0016762 | xyloglucan:xyloglucosyl transferase acti... | 0.011        |
|         | GO:0022839 | ion gated channel activity                  | 0.011        |
|         | GO:0016616 | oxidoreductase activity, acting on the C... | 0.012        |
|         | GO:0016651 | oxidoreductase activity, acting on NAD(P... | 0.013        |
|         | GO:0015103 | inorganic anion transmembrane transporte... | 0.020        |
|         | GO:0022836 | gated channel activity                      | 0.021        |
|         | GO:0016620 | oxidoreductase activity, acting on the a... | 0.021        |

Continued on next page

| GO type | GO ID      | Description                                  | Adj. p-value |
|---------|------------|----------------------------------------------|--------------|
|         | GO:0016853 | isomerase activity                           | 0.022        |
|         | GO:0036094 | small molecule binding                       | 0.023        |
|         | GO:0009055 | electron transfer activity                   | 0.024        |
|         | GO:0003954 | NADH dehydrogenase activity                  | 0.024        |
|         | GO:0004252 | serine-type endopeptidase activity           | 0.028        |
|         | GO:0008252 | nucleotidase activity                        | 0.028        |
|         | GO:0008266 | poly(U) RNA binding                          | 0.028        |
|         | GO:0016778 | diphosphotransferase activity                | 0.028        |
|         | GO:0016799 | hydrolase activity, hydrolyzing N-glycos...  | 0.028        |
|         | GO:0050661 | NADP binding                                 | 0.028        |
|         | GO:1901682 | sulfur compound transmembrane transporte...  | 0.028        |
|         | GO:0016776 | phosphotransferase activity, phosphate g...  | 0.030        |
|         | GO:2001070 | starch binding                               | 0.031        |
|         | GO:0016840 | carbon-nitrogen lyase activity               | 0.031        |
|         | GO:0001871 | pattern binding                              | 0.031        |
|         | GO:0016717 | oxidoreductase activity, acting on paire...  | 0.031        |
|         | GO:0030247 | polysaccharide binding                       | 0.031        |
|         | GO:0016887 | ATPase activity                              | 0.041        |
|         | GO:0005509 | calcium ion binding                          | 0.042        |
|         | GO:0044769 | ATPase activity, coupled to transmembran...  | 0.048        |
|         | GO:0000166 | nucleotide binding                           | 0.048        |
|         | GO:0008374 | O-acyltransferase activity                   | 0.048        |
|         | GO:1901265 | nucleoside phosphate binding                 | 0.048        |
|         | GO:0004674 | protein serine/threonine kinase activity     | 0.050        |
|         | GO:0005244 | voltage-gated ion channel activity           | 0.050        |
|         | GO:0022832 | voltage-gated channel activity               | 0.050        |
|         | GO:0043022 | ribosome binding                             | 0.053        |
|         | GO:0004659 | prenyltransferase activity                   | 0.055        |
|         | GO:0004812 | aminoacyl-tRNA ligase activity               | 0.055        |
|         | GO:0008238 | exopeptidase activity                        | 0.055        |
|         | GO:0016744 | transferase activity, transferring aldehy... | 0.055        |
|         | GO:0016875 | ligase activity, forming carbon-oxygen b...  | 0.055        |
|         | GO:0016307 | phosphatidylinositol phosphate kinase ac...  | 0.057        |
|         | GO:0016413 | O-acetyltransferase activity                 | 0.057        |
|         | GO:0051015 | actin filament binding                       | 0.057        |
|         | GO:0019829 | cation-transporting ATPase activity          | 0.060        |
|         | GO:0022853 | active ion transmembrane transporter act...  | 0.060        |
|         | GO:0042625 | ATPase coupled ion transmembrane transpo...  | 0.060        |
|         | GO:0070011 | peptidase activity, acting on L-amino ac...  | 0.060        |
|         | GO:0019104 | DNA N-glycosylase activity                   | 0.062        |
|         | GO:0008146 | sulfotransferase activity                    | 0.064        |
|         | GO:0008233 | peptidase activity                           | 0.064        |
|         | GO:0005507 | copper ion binding                           | 0.065        |
|         | GO:0016874 | ligase activity                              | 0.070        |
|         | GO:0042623 | ATPase activity, coupled                     | 0.070        |
|         | GO:0016615 | malate dehydrogenase activity                | 0.072        |
|         | GO:0015556 | C4-dicarboxylate transmembrane transport...  | 0.074        |
|         | GO:0022804 | active transmembrane transporter activit...  | 0.076        |
|         | GO:0051539 | 4 iron, 4 sulfur cluster binding             | 0.079        |

Continued on next page

| GO type | GO ID      | Description                                 | Adj. p-value |
|---------|------------|---------------------------------------------|--------------|
|         | GO:0004743 | pyruvate kinase activity                    | 0.079        |
|         | GO:0016405 | CoA-ligase activity                         | 0.079        |
|         | GO:0016878 | acid-thiol ligase activity                  | 0.079        |
|         | GO:0030955 | potassium ion binding                       | 0.079        |
|         | GO:0031420 | alkali metal ion binding                    | 0.079        |
|         | GO:0016861 | intramolecular oxidoreductase activity, ... | 0.087        |
|         | GO:0017111 | nucleoside-triphosphatase activity          | 0.087        |
|         | GO:0050660 | flavin adenine dinucleotide binding         | 0.087        |
|         | GO:0019842 | vitamin binding                             | 0.088        |
|         | GO:0016462 | pyrophosphatase activity                    | 0.089        |

#### 4.2.10 Leaf - Postflowering - Cluster 10

| GO type | GO ID      | Description                                 | Adj. p-value |
|---------|------------|---------------------------------------------|--------------|
|         | GO:0042493 | response to drug                            | 0.002        |
|         | GO:0003333 | amino acid transmembrane transport          | 0.004        |
|         | GO:0015807 | L-amino acid transport                      | 0.005        |
|         | GO:0055085 | transmembrane transport                     | 0.006        |
|         | GO:1902475 | L-alpha-amino acid transmembrane transpo... | 0.007        |
|         | GO:0051234 | establishment of localization               | 0.008        |
|         | GO:1901071 | glucosamine-containing compound metaboli... | 0.008        |
|         | GO:0006810 | transport                                   | 0.012        |
|         | GO:0051179 | localization                                | 0.012        |
|         | GO:0071702 | organic substance transport                 | 0.012        |
|         | GO:0006022 | aminoglycan metabolic process               | 0.013        |
|         | GO:0044550 | secondary metabolite biosynthetic proces... | 0.014        |
|         | GO:0015893 | drug transport                              | 0.018        |
|         | GO:0034219 | carbohydrate transmembrane transport        | 0.018        |
|         | GO:1905039 | carboxylic acid transmembrane transport     | 0.019        |
|         | GO:0010200 | response to chitin                          | 0.020        |
|         | GO:0035303 | regulation of dephosphorylation             | 0.020        |
|         | GO:0005996 | monosaccharide metabolic process            | 0.021        |
|         | GO:0080163 | regulation of protein serine/threonine p... | 0.023        |
|         | GO:1903825 | organic acid transmembrane transport        | 0.023        |
|         | GO:0015804 | neutral amino acid transport                | 0.027        |
|         | GO:0000209 | protein polyubiquitination                  | 0.030        |
|         | GO:0006665 | sphingolipid metabolic process              | 0.030        |
| BP      | GO:0010243 | response to organonitrogen compound         | 0.032        |
|         | GO:0010921 | regulation of phosphatase activity          | 0.034        |
|         | GO:0035304 | regulation of protein dephosphorylation     | 0.034        |
|         | GO:0007166 | cell surface receptor signaling pathway     | 0.034        |
|         | GO:0015706 | nitrate transport                           | 0.034        |
|         | GO:0055114 | oxidation-reduction process                 | 0.036        |
|         | GO:0006040 | amino sugar metabolic process               | 0.039        |
|         | GO:0006829 | zinc ion transport                          | 0.040        |
|         | GO:0006575 | cellular modified amino acid metabolic p... | 0.042        |
|         | GO:1901564 | organonitrogen compound metabolic proces... | 0.049        |
|         | GO:0043412 | macromolecule modification                  | 0.050        |
|         | GO:0006887 | exocytosis                                  | 0.051        |
|         | GO:0006820 | anion transport                             | 0.051        |
|         | GO:0043666 | regulation of phosphoprotein phosphatase... | 0.056        |
|         | GO:0006857 | oligopeptide transport                      | 0.065        |
|         | GO:0046942 | carboxylic acid transport                   | 0.067        |
|         | GO:0008037 | cell recognition                            | 0.069        |
|         | GO:0030148 | sphingolipid biosynthetic process           | 0.073        |
|         | GO:0036065 | fucosylation                                | 0.079        |
|         | GO:0015849 | organic acid transport                      | 0.081        |
|         | GO:0009875 | pollen-pistil interaction                   | 0.085        |
|         | GO:0048544 | recognition of pollen                       | 0.088        |
|         | GO:0006796 | phosphate-containing compound metabolic ... | 0.099        |

Continued on next page

| GO type | GO ID      | Description                                 | Adj. p-value |
|---------|------------|---------------------------------------------|--------------|
|         | GO:0019740 | nitrogen utilization                        | 0.099        |
| CC      | GO:0005886 | plasma membrane                             | 0.000        |
|         | GO:0099023 | tethering complex                           | 0.013        |
|         | GO:0000145 | exocyst                                     | 0.065        |
|         | GO:0004497 | monooxygenase activity                      | 0.000        |
|         | GO:0016705 | oxidoreductase activity, acting on paire... | 0.000        |
|         | GO:0030246 | carbohydrate binding                        | 0.000        |
|         | GO:0015294 | solute:cation symporter activity            | 0.000        |
|         | GO:0032559 | adenyl ribonucleotide binding               | 0.001        |
|         | GO:0030554 | adenyl nucleotide binding                   | 0.001        |
|         | GO:0043168 | anion binding                               | 0.001        |
|         | GO:0015318 | inorganic molecular entity transmembrane... | 0.001        |
|         | GO:0015171 | amino acid transmembrane transporter act... | 0.002        |
|         | GO:0032553 | ribonucleotide binding                      | 0.002        |
|         | GO:0015295 | solute:proton symporter activity            | 0.002        |
|         | GO:0042562 | hormone binding                             | 0.002        |
|         | GO:0015174 | basic amino acid transmembrane transport... | 0.002        |
|         | GO:0016491 | oxidoreductase activity                     | 0.004        |
|         | GO:0032555 | purine ribonucleotide binding               | 0.004        |
|         | GO:0017076 | purine nucleotide binding                   | 0.005        |
|         | GO:0005351 | carbohydrate:proton symporter activity      | 0.006        |
|         | GO:0005402 | carbohydrate:cation symporter activity      | 0.006        |
|         | GO:0016757 | transferase activity, transferring glyco... | 0.007        |
|         | GO:0051119 | sugar transmembrane transporter activity    | 0.007        |
|         | GO:0001871 | pattern binding                             | 0.007        |
|         | GO:0030247 | polysaccharide binding                      | 0.007        |
|         | GO:0022804 | active transmembrane transporter activit... | 0.008        |
|         | GO:0043167 | ion binding                                 | 0.008        |
|         | GO:0005385 | zinc ion transmembrane transporter activ... | 0.008        |
|         | GO:0015297 | antiporter activity                         | 0.010        |
|         | GO:0015075 | ion transmembrane transporter activity      | 0.012        |
|         | GO:0019208 | phosphatase regulator activity              | 0.014        |
|         | GO:0019888 | protein phosphatase regulator activity      | 0.014        |
|         | GO:0004857 | enzyme inhibitor activity                   | 0.015        |
|         | GO:0019840 | isoprenoid binding                          | 0.020        |
|         | GO:0003959 | NADPH dehydrogenase activity                | 0.021        |
|         | GO:0004864 | protein phosphatase inhibitor activity      | 0.025        |
|         | GO:0008483 | transaminase activity                       | 0.025        |
| MF      | GO:0016769 | transferase activity, transferring nitro... | 0.025        |
|         | GO:0019212 | phosphatase inhibitor activity              | 0.025        |
|         | GO:0046943 | carboxylic acid transmembrane transporte... | 0.029        |
|         | GO:0038023 | signaling receptor activity                 | 0.030        |
|         | GO:0060089 | molecular transducer activity               | 0.030        |
|         | GO:0072509 | divalent inorganic cation transmembrane ... | 0.033        |
|         | GO:0061630 | ubiquitin protein ligase activity           | 0.034        |
|         | GO:0005342 | organic acid transmembrane transporter a... | 0.034        |
|         | GO:0008417 | fucosyltransferase activity                 | 0.034        |
|         | GO:0030414 | peptidase inhibitor activity                | 0.034        |
|         | GO:0061134 | peptidase regulator activity                | 0.034        |

Continued on next page

| GO type | GO ID      | Description                                 | Adj. p-value |
|---------|------------|---------------------------------------------|--------------|
|         | GO:0010427 | abscisic acid binding                       | 0.035        |
|         | GO:0015238 | drug transmembrane transporter activity     | 0.035        |
|         | GO:0043178 | alcohol binding                             | 0.035        |
|         | GO:0015276 | ligand-gated ion channel activity           | 0.041        |
|         | GO:0022834 | ligand-gated channel activity               | 0.041        |
|         | GO:0004866 | endopeptidase inhibitor activity            | 0.044        |
|         | GO:0061135 | endopeptidase regulator activity            | 0.044        |
|         | GO:0004970 | ionotropic glutamate receptor activity      | 0.045        |
|         | GO:0005230 | extracellular ligand-gated ion channel a... | 0.045        |
|         | GO:0008066 | glutamate receptor activity                 | 0.045        |
|         | GO:0022824 | transmitter-gated ion channel activity      | 0.045        |
|         | GO:0022835 | transmitter-gated channel activity          | 0.045        |
|         | GO:0036094 | small molecule binding                      | 0.045        |
|         | GO:0008144 | drug binding                                | 0.047        |
|         | GO:0061659 | ubiquitin-like protein ligase activity      | 0.050        |
|         | GO:0004867 | serine-type endopeptidase inhibitor acti... | 0.051        |
|         | GO:0015175 | neutral amino acid transmembrane transpo... | 0.058        |
|         | GO:0000166 | nucleotide binding                          | 0.059        |
|         | GO:1901265 | nucleoside phosphate binding                | 0.059        |
|         | GO:0004888 | transmembrane signaling receptor activit... | 0.065        |
|         | GO:0035673 | oligopeptide transmembrane transporter a... | 0.065        |
|         | GO:0046915 | transition metal ion transmembrane trans... | 0.071        |
|         | GO:0046983 | protein dimerization activity               | 0.076        |
|         | GO:0030594 | neurotransmitter receptor activity          | 0.092        |

### 4.3 Root Preflowering clusters

#### 4.3.1 Root - Preflowering - Cluster 1

| GO type | GO ID      | Description                                 | Adj. p-value |
|---------|------------|---------------------------------------------|--------------|
|         | GO:0051276 | chromosome organization                     | 0.000        |
|         | GO:0034660 | ncRNA metabolic process                     | 0.000        |
|         | GO:0034470 | ncRNA processing                            | 0.000        |
|         | GO:0022613 | ribonucleoprotein complex biogenesis        | 0.000        |
|         | GO:0006974 | cellular response to DNA damage stimulus    | 0.000        |
|         | GO:0016071 | mRNA metabolic process                      | 0.000        |
|         | GO:0003006 | developmental process involved in reprod... | 0.000        |
|         | GO:0048856 | anatomical structure development            | 0.000        |
|         | GO:0022607 | cellular component assembly                 | 0.000        |
|         | GO:0009791 | post-embryonic development                  | 0.000        |
|         | GO:0007049 | cell cycle                                  | 0.000        |
|         | GO:0048608 | reproductive structure development          | 0.000        |
|         | GO:0061458 | reproductive system development             | 0.000        |
|         | GO:0033554 | cellular response to stress                 | 0.000        |
|         | GO:0016458 | gene silencing                              | 0.000        |
|         | GO:0010629 | negative regulation of gene expression      | 0.000        |
|         | GO:0048731 | system development                          | 0.000        |
|         | GO:0009790 | embryo development                          | 0.000        |
|         | GO:0031047 | gene silencing by RNA                       | 0.000        |
|         | GO:0006399 | tRNA metabolic process                      | 0.000        |
|         | GO:1903047 | mitotic cell cycle process                  | 0.000        |
|         | GO:0000278 | mitotic cell cycle                          | 0.000        |
|         | GO:0010608 | posttranscriptional regulation of gene e... | 0.000        |
|         | GO:0006304 | DNA modification                            | 0.000        |
|         | GO:0044728 | DNA methylation or demethylation            | 0.000        |
|         | GO:0016441 | posttranscriptional gene silencing          | 0.000        |
|         | GO:0006261 | DNA-dependent DNA replication               | 0.000        |
|         | GO:0006479 | protein methylation                         | 0.000        |
|         | GO:0035194 | posttranscriptional gene silencing by RN... | 0.000        |
|         | GO:0001510 | RNA methylation                             | 0.000        |
|         | GO:0016571 | histone methylation                         | 0.000        |
|         | GO:0018205 | peptidyl-lysine modification                | 0.000        |
|         | GO:0033043 | regulation of organelle organization        | 0.000        |
|         | GO:0007059 | chromosome segregation                      | 0.000        |
|         | GO:0050793 | regulation of developmental process         | 0.000        |
|         | GO:0018022 | peptidyl-lysine methylation                 | 0.000        |
|         | GO:0051052 | regulation of DNA metabolic process         | 0.000        |
|         | GO:0051641 | cellular localization                       | 0.000        |
|         | GO:2000113 | negative regulation of cellular macromol... | 0.000        |
|         | GO:0022618 | ribonucleoprotein complex assembly          | 0.000        |
|         | GO:0090501 | RNA phosphodiester bond hydrolysis          | 0.000        |
|         | GO:0010212 | response to ionizing radiation              | 0.000        |
|         | GO:0048869 | cellular developmental process              | 0.000        |
|         | GO:0009553 | embryo sac development                      | 0.000        |
|         | GO:0051726 | regulation of cell cycle                    | 0.000        |

Continued on next page



| GO type | GO ID      | Description                                 | Adj. p-value |
|---------|------------|---------------------------------------------|--------------|
|         | GO:0009653 | anatomical structure morphogenesis          | 0.000        |
|         | GO:0009908 | flower development                          | 0.000        |
|         | GO:0042274 | ribosomal small subunit biogenesis          | 0.000        |
|         | GO:0006342 | chromatin silencing                         | 0.000        |
|         | GO:0010564 | regulation of cell cycle process            | 0.000        |
|         | GO:0006417 | regulation of translation                   | 0.000        |
|         | GO:2000026 | regulation of multicellular organismal d... | 0.000        |
|         | GO:0007276 | gamete generation                           | 0.000        |
|         | GO:0006886 | intracellular protein transport             | 0.000        |
|         | GO:0048367 | shoot system development                    | 0.000        |
|         | GO:0070192 | chromosome organization involved in meio... | 0.000        |
|         | GO:0000902 | cell morphogenesis                          | 0.000        |
|         | GO:0006400 | tRNA modification                           | 0.000        |
|         | GO:0005977 | glycogen metabolic process                  | 0.000        |
|         | GO:0006112 | energy reserve metabolic process            | 0.000        |
|         | GO:0048580 | regulation of post-embryonic development    | 0.000        |
|         | GO:0070925 | organelle assembly                          | 0.000        |
|         | GO:0045132 | meiotic chromosome segregation              | 0.000        |
|         | GO:0030490 | maturation of SSU-rRNA                      | 0.000        |
|         | GO:0071824 | protein-DNA complex subunit organization    | 0.000        |
|         | GO:0061077 | chaperone-mediated protein folding          | 0.000        |
|         | GO:0000154 | rRNA modification                           | 0.000        |
|         | GO:0065004 | protein-DNA complex assembly                | 0.001        |
|         | GO:0048831 | regulation of shoot system development      | 0.001        |
|         | GO:0000281 | mitotic cytokinesis                         | 0.001        |
|         | GO:0000469 | cleavage involved in rRNA processing        | 0.001        |
|         | GO:0032984 | protein-containing complex disassembly      | 0.001        |
|         | GO:0000245 | spliceosomal complex assembly               | 0.001        |
|         | GO:0005978 | glycogen biosynthetic process               | 0.001        |
|         | GO:0009890 | negative regulation of biosynthetic proc... | 0.001        |
|         | GO:0045934 | negative regulation of nucleobase-contai... | 0.001        |
|         | GO:0048518 | positive regulation of biological proces... | 0.001        |
|         | GO:0009266 | response to temperature stimulus            | 0.001        |
|         | GO:0051168 | nuclear export                              | 0.001        |
|         | GO:0009314 | response to radiation                       | 0.001        |
|         | GO:0009161 | ribonucleoside monophosphate metabolic p... | 0.001        |
|         | GO:0009123 | nucleoside monophosphate metabolic proce... | 0.001        |
|         | GO:0007346 | regulation of mitotic cell cycle            | 0.002        |
|         | GO:0009909 | regulation of flower development            | 0.002        |
|         | GO:0046185 | aldehyde catabolic process                  | 0.002        |
|         | GO:2000241 | regulation of reproductive process          | 0.002        |
|         | GO:0000819 | sister chromatid segregation                | 0.002        |
|         | GO:0006298 | mismatch repair                             | 0.002        |
|         | GO:0061640 | cytoskeleton-dependent cytokinesis          | 0.002        |
|         | GO:0031935 | regulation of chromatin silencing           | 0.002        |
|         | GO:0045143 | homologous chromosome segregation           | 0.002        |
|         | GO:1901987 | regulation of cell cycle phase transitio... | 0.002        |
|         | GO:0006611 | protein export from nucleus                 | 0.002        |
|         | GO:0015833 | peptide transport                           | 0.002        |

Continued on next page

| GO type | GO ID      | Description                                 | Adj. p-value |
|---------|------------|---------------------------------------------|--------------|
|         | GO:0042886 | amide transport                             | 0.002        |
|         | GO:0000373 | Group II intron splicing                    | 0.002        |
|         | GO:0030488 | tRNA methylation                            | 0.002        |
|         | GO:0007129 | synapsis                                    | 0.002        |
|         | GO:0016573 | histone acetylation                         | 0.002        |
|         | GO:0018393 | internal peptidyl-lysine acetylation        | 0.002        |
|         | GO:0018394 | peptidyl-lysine acetylation                 | 0.002        |
|         | GO:0006323 | DNA packaging                               | 0.003        |
|         | GO:0010228 | vegetative to reproductive phase transit... | 0.003        |
|         | GO:0007033 | vacuole organization                        | 0.003        |
|         | GO:0044770 | cell cycle phase transition                 | 0.003        |
|         | GO:0055046 | microgametogenesis                          | 0.003        |
|         | GO:0071478 | cellular response to radiation              | 0.003        |
|         | GO:1901990 | regulation of mitotic cell cycle phase t... | 0.003        |
|         | GO:0051567 | histone H3-K9 methylation                   | 0.003        |
|         | GO:0061647 | histone H3-K9 modification                  | 0.003        |
|         | GO:0022411 | cellular component disassembly              | 0.003        |
|         | GO:0044786 | cell cycle DNA replication                  | 0.003        |
|         | GO:0031060 | regulation of histone methylation           | 0.004        |
|         | GO:0042255 | ribosome assembly                           | 0.004        |
|         | GO:0006475 | internal protein amino acid acetylation     | 0.004        |
|         | GO:0035195 | gene silencing by miRNA                     | 0.004        |
|         | GO:0071407 | cellular response to organic cyclic comp... | 0.004        |
|         | GO:0044249 | cellular biosynthetic process               | 0.004        |
|         | GO:0051094 | positive regulation of developmental pro... | 0.004        |
|         | GO:0035196 | production of miRNAs involved in gene si... | 0.005        |
|         | GO:0048284 | organelle fusion                            | 0.005        |
|         | GO:0090502 | RNA phosphodiester bond hydrolysis, endo... | 0.005        |
|         | GO:0006405 | RNA export from nucleus                     | 0.005        |
|         | GO:0072528 | pyrimidine-containing compound biosynthe... | 0.005        |
|         | GO:0048232 | male gamete generation                      | 0.005        |
|         | GO:0000460 | maturation of 5.8S rRNA                     | 0.005        |
|         | GO:0009126 | purine nucleoside monophosphate metaboli... | 0.006        |
|         | GO:0009167 | purine ribonucleoside monophosphate meta... | 0.006        |
|         | GO:0010639 | negative regulation of organelle organiz... | 0.006        |
|         | GO:0043624 | cellular protein complex disassembly        | 0.006        |
|         | GO:0051172 | negative regulation of nitrogen compound... | 0.006        |
|         | GO:0030154 | cell differentiation                        | 0.006        |
|         | GO:0006406 | mRNA export from nucleus                    | 0.006        |
|         | GO:0071427 | mRNA-containing ribonucleoprotein comple... | 0.006        |
|         | GO:0043038 | amino acid activation                       | 0.007        |
|         | GO:0043039 | tRNA aminoacylation                         | 0.007        |
|         | GO:0044772 | mitotic cell cycle phase transition         | 0.007        |
|         | GO:0006403 | RNA localization                            | 0.007        |
|         | GO:0031167 | rRNA methylation                            | 0.007        |
|         | GO:0009893 | positive regulation of metabolic process    | 0.007        |
|         | GO:0000466 | maturation of 5.8S rRNA from tricistroni... | 0.007        |
|         | GO:0048437 | floral organ development                    | 0.007        |
|         | GO:0006284 | base-excision repair                        | 0.007        |

Continued on next page

| GO type | GO ID      | Description                                 | Adj. p-value |
|---------|------------|---------------------------------------------|--------------|
|         | GO:0019953 | sexual reproduction                         | 0.007        |
|         | GO:0015980 | energy derivation by oxidation of organi... | 0.007        |
|         | GO:0050657 | nucleic acid transport                      | 0.007        |
|         | GO:0050658 | RNA transport                               | 0.007        |
|         | GO:0051236 | establishment of RNA localization           | 0.007        |
|         | GO:0009156 | ribonucleoside monophosphate biosyntheti... | 0.007        |
|         | GO:0006289 | nucleotide-excision repair                  | 0.008        |
|         | GO:0009117 | nucleotide metabolic process                | 0.008        |
|         | GO:0031497 | chromatin assembly                          | 0.008        |
|         | GO:0009124 | nucleoside monophosphate biosynthetic pr... | 0.008        |
|         | GO:0031056 | regulation of histone modification          | 0.008        |
|         | GO:0017148 | negative regulation of translation          | 0.008        |
|         | GO:0009845 | seed germination                            | 0.008        |
|         | GO:0009438 | methylglyoxal metabolic process             | 0.008        |
|         | GO:0042182 | ketone catabolic process                    | 0.008        |
|         | GO:0051596 | methylglyoxal catabolic process             | 0.008        |
|         | GO:0034728 | nucleosome organization                     | 0.009        |
|         | GO:0045037 | protein import into chloroplast stroma      | 0.009        |
|         | GO:0071166 | ribonucleoprotein complex localization      | 0.009        |
|         | GO:0071426 | ribonucleoprotein complex export from nu... | 0.009        |
|         | GO:0090351 | seedling development                        | 0.009        |
|         | GO:0033365 | protein localization to organelle           | 0.009        |
|         | GO:0048868 | pollen tube development                     | 0.010        |
|         | GO:0006753 | nucleoside phosphate metabolic process      | 0.010        |
|         | GO:0010332 | response to gamma radiation                 | 0.010        |
|         | GO:0048523 | negative regulation of cellular process     | 0.010        |
|         | GO:0006376 | mRNA splice site selection                  | 0.010        |
|         | GO:0031324 | negative regulation of cellular metaboli... | 0.010        |
|         | GO:0048582 | positive regulation of post-embryonic de... | 0.010        |
|         | GO:0006333 | chromatin assembly or disassembly           | 0.011        |
|         | GO:0006418 | tRNA aminoacylation for protein translat... | 0.011        |
|         | GO:0045036 | protein targeting to chloroplast            | 0.011        |
|         | GO:0072596 | establishment of protein localization to... | 0.011        |
|         | GO:0048522 | positive regulation of cellular process     | 0.012        |
|         | GO:0051240 | positive regulation of multicellular org... | 0.012        |
|         | GO:0016192 | vesicle-mediated transport                  | 0.012        |
|         | GO:0051253 | negative regulation of RNA metabolic pro... | 0.012        |
|         | GO:0034249 | negative regulation of cellular amide me... | 0.012        |
|         | GO:0010604 | positive regulation of macromolecule met... | 0.012        |
|         | GO:0006334 | nucleosome assembly                         | 0.013        |
|         | GO:0006366 | transcription by RNA polymerase II          | 0.013        |
|         | GO:0009860 | pollen tube growth                          | 0.013        |
|         | GO:0009165 | nucleotide biosynthetic process             | 0.013        |
|         | GO:2000242 | negative regulation of reproductive proc... | 0.015        |
|         | GO:1901293 | nucleoside phosphate biosynthetic proces... | 0.015        |
|         | GO:0044260 | cellular macromolecule metabolic process    | 0.015        |
|         | GO:0000027 | ribosomal large subunit assembly            | 0.015        |
|         | GO:0010073 | meristem maintenance                        | 0.016        |
|         | GO:0007292 | female gamete generation                    | 0.016        |

Continued on next page

| GO type | GO ID      | Description                                 | Adj. p-value |
|---------|------------|---------------------------------------------|--------------|
|         | GO:0006415 | translational termination                   | 0.017        |
|         | GO:0016074 | snoRNA metabolic process                    | 0.017        |
|         | GO:0016973 | poly(A)+ mRNA export from nucleus           | 0.017        |
|         | GO:0043144 | snoRNA processing                           | 0.017        |
|         | GO:0005983 | starch catabolic process                    | 0.017        |
|         | GO:0031503 | protein-containing complex localization     | 0.017        |
|         | GO:0072598 | protein localization to chloroplast         | 0.018        |
|         | GO:0006271 | DNA strand elongation involved in DNA re... | 0.018        |
|         | GO:0022616 | DNA strand elongation                       | 0.018        |
|         | GO:0048438 | floral whorl development                    | 0.018        |
|         | GO:0043543 | protein acylation                           | 0.019        |
|         | GO:2001251 | negative regulation of chromosome organi... | 0.019        |
|         | GO:0006221 | pyrimidine nucleotide biosynthetic proce... | 0.019        |
|         | GO:0000478 | endonucleolytic cleavage involved in rRN... | 0.019        |
|         | GO:0006089 | lactate metabolic process                   | 0.019        |
|         | GO:0006273 | lagging strand elongation                   | 0.019        |
|         | GO:0019243 | methylglyoxal catabolic process to D-lac... | 0.019        |
|         | GO:0051129 | negative regulation of cellular componen... | 0.019        |
|         | GO:0061727 | methylglyoxal catabolic process to lacta... | 0.019        |
|         | GO:0006338 | chromatin remodeling                        | 0.019        |
|         | GO:0072594 | establishment of protein localization to... | 0.019        |
|         | GO:1902679 | negative regulation of RNA biosynthetic ... | 0.019        |
|         | GO:1903507 | negative regulation of nucleic acid-temp... | 0.019        |
|         | GO:1905268 | negative regulation of chromatin organiz... | 0.019        |
|         | GO:0006473 | protein acetylation                         | 0.019        |
|         | GO:0044703 | multi-organism reproductive process         | 0.020        |
|         | GO:0051028 | mRNA transport                              | 0.020        |
|         | GO:0032268 | regulation of cellular protein metabolic... | 0.020        |
|         | GO:0140014 | mitotic nuclear division                    | 0.020        |
|         | GO:0051246 | regulation of protein metabolic process     | 0.021        |
|         | GO:0009259 | ribonucleotide metabolic process            | 0.021        |
|         | GO:0009911 | positive regulation of flower developmen... | 0.022        |
|         | GO:0048581 | negative regulation of post-embryonic de... | 0.024        |
|         | GO:0051304 | chromosome separation                       | 0.024        |
|         | GO:0019252 | starch biosynthetic process                 | 0.024        |
|         | GO:0019693 | ribose phosphate metabolic process          | 0.024        |
|         | GO:0032784 | regulation of DNA-templated transcriptio... | 0.024        |
|         | GO:0000904 | cell morphogenesis involved in different... | 0.025        |
|         | GO:0006913 | nucleocytoplasmic transport                 | 0.026        |
|         | GO:0032270 | positive regulation of cellular protein ... | 0.026        |
|         | GO:0051169 | nuclear transport                           | 0.026        |
|         | GO:0051247 | positive regulation of protein metabolic... | 0.026        |
|         | GO:0009218 | pyrimidine ribonucleotide metabolic proc... | 0.027        |
|         | GO:0009220 | pyrimidine ribonucleotide biosynthetic p... | 0.027        |
|         | GO:0006413 | translational initiation                    | 0.028        |
|         | GO:0006075 | (1-;3)-beta-D-glucan biosynthetic proces... | 0.028        |
|         | GO:0009629 | response to gravity                         | 0.028        |
|         | GO:0070828 | heterochromatin organization                | 0.028        |
|         | GO:0060627 | regulation of vesicle-mediated transport    | 0.028        |

Continued on next page

| GO type | GO ID      | Description                                 | Adj. p-value |
|---------|------------|---------------------------------------------|--------------|
|         | GO:0140053 | mitochondrial gene expression               | 0.028        |
|         | GO:0071214 | cellular response to abiotic stimulus       | 0.028        |
|         | GO:0104004 | cellular response to environmental stimu... | 0.028        |
|         | GO:0042023 | DNA endoreduplication                       | 0.029        |
|         | GO:0048825 | cotyledon development                       | 0.029        |
|         | GO:0009127 | purine nucleoside monophosphate biosynth... | 0.029        |
|         | GO:0009168 | purine ribonucleoside monophosphate bios... | 0.029        |
|         | GO:0006220 | pyrimidine nucleotide metabolic process     | 0.030        |
|         | GO:0051053 | negative regulation of DNA metabolic pro... | 0.031        |
|         | GO:0048444 | floral organ morphogenesis                  | 0.031        |
|         | GO:0007140 | male meiotic nuclear division               | 0.031        |
|         | GO:0009910 | negative regulation of flower developmen... | 0.032        |
|         | GO:0009642 | response to light intensity                 | 0.033        |
|         | GO:1900140 | regulation of seedling development          | 0.034        |
|         | GO:0042542 | response to hydrogen peroxide               | 0.034        |
|         | GO:0006605 | protein targeting                           | 0.036        |
|         | GO:0017038 | protein import                              | 0.037        |
|         | GO:0009416 | response to light stimulus                  | 0.037        |
|         | GO:0006775 | fat-soluble vitamin metabolic process       | 0.039        |
|         | GO:0010189 | vitamin E biosynthetic process              | 0.039        |
|         | GO:0042360 | vitamin E metabolic process                 | 0.039        |
|         | GO:0042362 | fat-soluble vitamin biosynthetic process    | 0.039        |
|         | GO:0009743 | response to carbohydrate                    | 0.040        |
|         | GO:0071482 | cellular response to light stimulus         | 0.040        |
|         | GO:0000075 | cell cycle checkpoint                       | 0.041        |
|         | GO:0000302 | response to reactive oxygen species         | 0.041        |
|         | GO:0006207 | 'de novo' pyrimidine nucleobase biosynth... | 0.041        |
|         | GO:0008360 | regulation of cell shape                    | 0.041        |
|         | GO:0031338 | regulation of vesicle fusion                | 0.041        |
|         | GO:0051640 | organelle localization                      | 0.041        |
|         | GO:0006188 | IMP biosynthetic process                    | 0.042        |
|         | GO:0017004 | cytochrome complex assembly                 | 0.042        |
|         | GO:0009615 | response to virus                           | 0.043        |
|         | GO:0042180 | cellular ketone metabolic process           | 0.044        |
|         | GO:0010030 | positive regulation of seed germination     | 0.045        |
|         | GO:0072527 | pyrimidine-containing compound metabolic... | 0.046        |
|         | GO:0051307 | meiotic chromosome separation               | 0.047        |
|         | GO:0090174 | organelle membrane fusion                   | 0.048        |
|         | GO:0048440 | carpel development                          | 0.048        |
|         | GO:0009260 | ribonucleotide biosynthetic process         | 0.048        |
|         | GO:0046390 | ribose phosphate biosynthetic process       | 0.048        |
|         | GO:0009630 | gravitropism                                | 0.049        |
|         | GO:0046132 | pyrimidine ribonucleoside biosynthetic p... | 0.051        |
|         | GO:0046134 | pyrimidine nucleoside biosynthetic proce... | 0.051        |
|         | GO:0051241 | negative regulation of multicellular org... | 0.052        |
|         | GO:0035670 | plant-type ovary development                | 0.052        |
|         | GO:0048481 | plant ovule development                     | 0.052        |
|         | GO:0031325 | positive regulation of cellular metaboli... | 0.052        |
|         | GO:0006357 | regulation of transcription by RNA polym... | 0.053        |

Continued on next page

| GO type | GO ID      | Description                                 | Adj. p-value |
|---------|------------|---------------------------------------------|--------------|
|         | GO:0006950 | response to stress                          | 0.055        |
|         | GO:0034614 | cellular response to reactive oxygen spe... | 0.055        |
|         | GO:0048507 | meristem development                        | 0.057        |
|         | GO:0010029 | regulation of seed germination              | 0.057        |
|         | GO:0009060 | aerobic respiration                         | 0.057        |
|         | GO:0022406 | membrane docking                            | 0.058        |
|         | GO:0046040 | IMP metabolic process                       | 0.058        |
|         | GO:0140056 | organelle localization by membrane tethe... | 0.058        |
|         | GO:0051716 | cellular response to stimulus               | 0.058        |
|         | GO:0006906 | vesicle fusion                              | 0.059        |
|         | GO:0006352 | DNA-templated transcription, initiation     | 0.062        |
|         | GO:0043632 | modification-dependent macromolecule cat... | 0.063        |
|         | GO:0009555 | pollen development                          | 0.063        |
|         | GO:0043647 | inositol phosphate metabolic process        | 0.064        |
|         | GO:0045787 | positive regulation of cell cycle           | 0.064        |
|         | GO:0007267 | cell-cell signaling                         | 0.065        |
|         | GO:0048468 | cell development                            | 0.065        |
|         | GO:2001020 | regulation of response to DNA damage sti... | 0.066        |
|         | GO:0048598 | embryonic morphogenesis                     | 0.066        |
|         | GO:0008283 | cell proliferation                          | 0.068        |
|         | GO:0044003 | modification by symbiont of host morphol... | 0.068        |
|         | GO:0007093 | mitotic cell cycle checkpoint               | 0.069        |
|         | GO:0048278 | vesicle docking                             | 0.072        |
|         | GO:0006354 | DNA-templated transcription, elongation     | 0.073        |
|         | GO:0048467 | gynoecium development                       | 0.078        |
|         | GO:0000959 | mitochondrial RNA metabolic process         | 0.082        |
|         | GO:0015931 | nucleobase-containing compound transport    | 0.083        |
|         | GO:0051817 | modification of morphology or physiology... | 0.083        |
|         | GO:0070816 | phosphorylation of RNA polymerase II C-t... | 0.085        |
|         | GO:0006904 | vesicle docking involved in exocytosis      | 0.086        |
|         | GO:0032543 | mitochondrial translation                   | 0.086        |
|         | GO:0140029 | exocytic process                            | 0.086        |
|         | GO:0006383 | transcription by RNA polymerase III         | 0.086        |
|         | GO:0009932 | cell tip growth                             | 0.088        |
|         | GO:0090626 | plant epidermis morphogenesis               | 0.088        |
|         | GO:0009129 | pyrimidine nucleoside monophosphate meta... | 0.091        |
|         | GO:0009130 | pyrimidine nucleoside monophosphate bios... | 0.091        |
|         | GO:0010948 | negative regulation of cell cycle proces... | 0.091        |
|         | GO:0042127 | regulation of cell proliferation            | 0.092        |
|         | GO:0035265 | organ growth                                | 0.092        |
|         | GO:0065002 | intracellular protein transmembrane tran... | 0.092        |
|         | GO:0051173 | positive regulation of nitrogen compound... | 0.093        |
|         | GO:0019856 | pyrimidine nucleobase biosynthetic proce... | 0.093        |
|         | GO:0030036 | actin cytoskeleton organization             | 0.093        |
|         | GO:0043254 | regulation of protein complex assembly      | 0.093        |
|         | GO:0009904 | chloroplast accumulation movement           | 0.093        |
|         | GO:0009163 | nucleoside biosynthetic process             | 0.093        |
|         | GO:0042455 | ribonucleoside biosynthetic process         | 0.093        |
|         | GO:0071806 | protein transmembrane transport             | 0.094        |

Continued on next page

| GO type | GO ID      | Description                                 | Adj. p-value |
|---------|------------|---------------------------------------------|--------------|
|         | GO:0045737 | positive regulation of cyclin-dependent ... | 0.097        |
|         | GO:0090329 | regulation of DNA-dependent DNA replicat... | 0.097        |
|         | GO:0033108 | mitochondrial respiratory chain complex ... | 0.099        |
|         | GO:1902494 | catalytic complex                           | 0.000        |
|         | GO:0005634 | nucleus                                     | 0.000        |
|         | GO:0044427 | chromosomal part                            | 0.000        |
|         | GO:1990904 | ribonucleoprotein complex                   | 0.000        |
|         | GO:1990234 | transferase complex                         | 0.000        |
|         | GO:0000228 | nuclear chromosome                          | 0.000        |
|         | GO:0044454 | nuclear chromosome part                     | 0.000        |
|         | GO:0005654 | nucleoplasm                                 | 0.000        |
|         | GO:0009526 | plastid envelope                            | 0.000        |
|         | GO:0009579 | thylakoid                                   | 0.000        |
|         | GO:0061695 | transferase complex, transferring phosph... | 0.000        |
|         | GO:0000785 | chromatin                                   | 0.000        |
|         | GO:0000151 | ubiquitin ligase complex                    | 0.000        |
|         | GO:0031461 | cullin-RING ubiquitin ligase complex        | 0.000        |
|         | GO:0016604 | nuclear body                                | 0.000        |
|         | GO:0000428 | DNA-directed RNA polymerase complex         | 0.000        |
|         | GO:0030880 | RNA polymerase complex                      | 0.000        |
|         | GO:0000793 | condensed chromosome                        | 0.000        |
|         | GO:0055029 | nuclear DNA-directed RNA polymerase comp... | 0.001        |
|         | GO:0042646 | plastid nucleoid                            | 0.001        |
|         | GO:0005657 | replication fork                            | 0.001        |
|         | GO:0005663 | DNA replication factor C complex            | 0.001        |
|         | GO:0000229 | cytoplasmic chromosome                      | 0.001        |
|         | GO:0009528 | plastid inner membrane                      | 0.001        |
|         | GO:0000123 | histone acetyltransferase complex           | 0.001        |
|         | GO:0000790 | nuclear chromatin                           | 0.002        |
| CC      | GO:0009295 | nucleoid                                    | 0.002        |
|         | GO:0005684 | U2-type spliceosomal complex                | 0.002        |
|         | GO:0009706 | chloroplast inner membrane                  | 0.003        |
|         | GO:0009508 | plastid chromosome                          | 0.003        |
|         | GO:0030532 | small nuclear ribonucleoprotein complex     | 0.004        |
|         | GO:0097525 | spliceosomal snRNP complex                  | 0.004        |
|         | GO:0120114 | Sm-like protein family complex              | 0.004        |
|         | GO:0009707 | chloroplast outer membrane                  | 0.004        |
|         | GO:0031984 | organelle subcompartment                    | 0.004        |
|         | GO:0071010 | prespliceosome                              | 0.005        |
|         | GO:0009524 | phragmoplast                                | 0.005        |
|         | GO:0016607 | nuclear speck                               | 0.007        |
|         | GO:0009527 | plastid outer membrane                      | 0.008        |
|         | GO:0031248 | protein acetyltransferase complex           | 0.009        |
|         | GO:1902493 | acetyltransferase complex                   | 0.009        |
|         | GO:0005643 | nuclear pore                                | 0.012        |
|         | GO:0071004 | U2-type prespliceosome                      | 0.016        |
|         | GO:0030687 | preribosome, large subunit precursor        | 0.020        |
|         | GO:0019867 | outer membrane                              | 0.021        |
|         | GO:0031977 | thylakoid lumen                             | 0.021        |

Continued on next page

| GO type | GO ID      | Description                                 | Adj. p-value |
|---------|------------|---------------------------------------------|--------------|
|         | GO:0000148 | 1,3-beta-D-glucan synthase complex          | 0.023        |
|         | GO:0031968 | organelle outer membrane                    | 0.025        |
|         | GO:0000313 | organellar ribosome                         | 0.038        |
|         | GO:0015030 | Cajal body                                  | 0.042        |
|         | GO:0098805 | whole membrane                              | 0.050        |
|         | GO:0005761 | mitochondrial ribosome                      | 0.056        |
|         | GO:0005666 | DNA-directed RNA polymerase III complex     | 0.057        |
|         | GO:0042644 | chloroplast nucleoid                        | 0.060        |
|         | GO:0140098 | catalytic activity, acting on RNA           | 0.000        |
|         | GO:0003676 | nucleic acid binding                        | 0.000        |
|         | GO:0004386 | helicase activity                           | 0.000        |
|         | GO:0008094 | DNA-dependent ATPase activity               | 0.000        |
|         | GO:0008173 | RNA methyltransferase activity              | 0.000        |
|         | GO:0003724 | RNA helicase activity                       | 0.000        |
|         | GO:0003678 | DNA helicase activity                       | 0.000        |
|         | GO:0008170 | N-methyltransferase activity                | 0.000        |
|         | GO:0008276 | protein methyltransferase activity          | 0.000        |
|         | GO:0004519 | endonuclease activity                       | 0.000        |
|         | GO:0042054 | histone methyltransferase activity          | 0.000        |
|         | GO:0016278 | lysine N-methyltransferase activity         | 0.000        |
|         | GO:0016279 | protein-lysine N-methyltransferase activ... | 0.000        |
|         | GO:0019783 | ubiquitin-like protein-specific protease... | 0.001        |
|         | GO:0044877 | protein-containing complex binding          | 0.001        |
|         | GO:0051082 | unfolded protein binding                    | 0.001        |
|         | GO:0003899 | DNA-directed 5'-3' RNA polymerase activi... | 0.002        |
|         | GO:0016866 | intramolecular transferase activity         | 0.002        |
|         | GO:0019843 | rRNA binding                                | 0.003        |
|         | GO:0003689 | DNA clamp loader activity                   | 0.003        |
|         | GO:0033170 | protein-DNA loading ATPase activity         | 0.003        |
|         | GO:0036459 | thiol-dependent ubiquitinyl hydrolase ac... | 0.003        |
|         | GO:0101005 | ubiquitinyl hydrolase activity              | 0.003        |
|         | GO:0016423 | tRNA (guanine) methyltransferase activit... | 0.003        |
|         | GO:0016893 | endonuclease activity, active with eithe... | 0.004        |
|         | GO:0016853 | isomerase activity                          | 0.004        |
|         | GO:0004527 | exonuclease activity                        | 0.004        |
|         | GO:0043021 | ribonucleoprotein complex binding           | 0.004        |
|         | GO:0004536 | deoxyribonuclease activity                  | 0.005        |
|         | GO:0003690 | double-stranded DNA binding                 | 0.006        |
|         | GO:0003684 | damaged DNA binding                         | 0.006        |
|         | GO:0016796 | exonuclease activity, active with either... | 0.008        |
|         | GO:0016891 | endoribonuclease activity, producing 5'-... | 0.008        |
|         | GO:0030983 | mismatched DNA binding                      | 0.008        |
|         | GO:0036094 | small molecule binding                      | 0.008        |
|         | GO:0008135 | translation factor activity, RNA binding    | 0.009        |
|         | GO:0008649 | rRNA methyltransferase activity             | 0.009        |
| MF      | GO:0140102 | catalytic activity, acting on a rRNA        | 0.009        |
|         | GO:0008175 | tRNA methyltransferase activity             | 0.009        |
|         | GO:0043621 | protein self-association                    | 0.011        |
|         | GO:0003924 | GTPase activity                             | 0.011        |

Continued on next page



| GO type | GO ID      | Description                                 | Adj. p-value |
|---------|------------|---------------------------------------------|--------------|
|         | GO:0008408 | 3'-5' exonuclease activity                  | 0.011        |
|         | GO:0004540 | ribonuclease activity                       | 0.014        |
|         | GO:0000166 | nucleotide binding                          | 0.020        |
|         | GO:1901265 | nucleoside phosphate binding                | 0.020        |
|         | GO:0005527 | macrolide binding                           | 0.021        |
|         | GO:0005528 | FK506 binding                               | 0.021        |
|         | GO:0003729 | mRNA binding                                | 0.021        |
|         | GO:0016874 | ligase activity                             | 0.023        |
|         | GO:0003713 | transcription coactivator activity          | 0.025        |
|         | GO:0051087 | chaperone binding                           | 0.025        |
|         | GO:1901363 | heterocyclic compound binding               | 0.025        |
|         | GO:0097159 | organic cyclic compound binding             | 0.026        |
|         | GO:0004520 | endodeoxyribonuclease activity              | 0.029        |
|         | GO:0004812 | aminoacyl-tRNA ligase activity              | 0.029        |
|         | GO:0016875 | ligase activity, forming carbon-oxygen b... | 0.029        |
|         | GO:0004521 | endoribonuclease activity                   | 0.033        |
|         | GO:0042162 | telomeric DNA binding                       | 0.034        |
|         | GO:0051536 | iron-sulfur cluster binding                 | 0.037        |
|         | GO:0051540 | metal cluster binding                       | 0.037        |
|         | GO:0008138 | protein tyrosine/serine/threonine phosph... | 0.037        |
|         | GO:0016884 | carbon-nitrogen ligase activity, with gl... | 0.039        |
|         | GO:0004529 | exodeoxyribonuclease activity               | 0.042        |
|         | GO:0016895 | exodeoxyribonuclease activity, producing... | 0.042        |
|         | GO:0004549 | tRNA-specific ribonuclease activity         | 0.043        |
|         | GO:0004526 | ribonuclease P activity                     | 0.045        |
|         | GO:0042803 | protein homodimerization activity           | 0.045        |
|         | GO:0003843 | 1,3-beta-D-glucan synthase activity         | 0.048        |
|         | GO:0017069 | snRNA binding                               | 0.061        |
|         | GO:0060589 | nucleoside-triphosphatase regulator acti... | 0.064        |
|         | GO:0016774 | phosphotransferase activity, carboxyl gr... | 0.078        |
|         | GO:0030695 | GTPase regulator activity                   | 0.086        |
|         | GO:0004402 | histone acetyltransferase activity          | 0.096        |
|         | GO:0061733 | peptide-lysine-N-acetyltransferase activ... | 0.096        |
|         | GO:0003697 | single-stranded DNA binding                 | 0.098        |

### 4.3.2 Root - Preflowering - Cluster 2

| GO type | GO ID      | Description                                 | Adj. p-value |
|---------|------------|---------------------------------------------|--------------|
|         | GO:0009404 | toxin metabolic process                     | 0.000        |
|         | GO:0055085 | transmembrane transport                     | 0.000        |
|         | GO:0009753 | response to jasmonic acid                   | 0.000        |
|         | GO:0098754 | detoxification                              | 0.000        |
|         | GO:0009636 | response to toxic substance                 | 0.001        |
|         | GO:0042430 | indole-containing compound metabolic pro... | 0.001        |
|         | GO:0009072 | aromatic amino acid family metabolic pro... | 0.002        |
|         | GO:0003333 | amino acid transmembrane transport          | 0.002        |
|         | GO:0010243 | response to organonitrogen compound         | 0.004        |
|         | GO:0008645 | hexose transmembrane transport              | 0.004        |
|         | GO:0015749 | monosaccharide transmembrane transport      | 0.004        |
|         | GO:0051346 | negative regulation of hydrolase activit... | 0.004        |
|         | GO:0043412 | macromolecule modification                  | 0.004        |
|         | GO:0006040 | amino sugar metabolic process               | 0.005        |
|         | GO:0006575 | cellular modified amino acid metabolic p... | 0.005        |
|         | GO:1904659 | glucose transmembrane transport             | 0.006        |
|         | GO:0006820 | anion transport                             | 0.007        |
|         | GO:0009312 | oligosaccharide biosynthetic process        | 0.007        |
|         | GO:0098542 | defense response to other organism          | 0.007        |
|         | GO:0001666 | response to hypoxia                         | 0.007        |
|         | GO:0009607 | response to biotic stimulus                 | 0.007        |
|         | GO:0043086 | negative regulation of catalytic activit... | 0.008        |
|         | GO:0009627 | systemic acquired resistance                | 0.008        |
|         | GO:0071229 | cellular response to acid chemical          | 0.008        |
|         | GO:0009308 | amine metabolic process                     | 0.008        |
|         | GO:0046323 | glucose import                              | 0.008        |
|         | GO:0009073 | aromatic amino acid family biosynthetic ... | 0.009        |
|         | GO:0044092 | negative regulation of molecular functio... | 0.009        |
|         | GO:1905039 | carboxylic acid transmembrane transport     | 0.009        |
|         | GO:0006568 | tryptophan metabolic process                | 0.009        |
|         | GO:0006586 | indolalkylamine metabolic process           | 0.009        |
|         | GO:0046351 | disaccharide biosynthetic process           | 0.009        |
|         | GO:0009751 | response to salicylic acid                  | 0.010        |
|         | GO:0046942 | carboxylic acid transport                   | 0.011        |
|         | GO:1901136 | carbohydrate derivative catabolic proces... | 0.013        |
|         | GO:0070482 | response to oxygen levels                   | 0.015        |
| BP      | GO:0009593 | detection of chemical stimulus              | 0.015        |
|         | GO:0051704 | multi-organism process                      | 0.015        |
|         | GO:0043207 | response to external biotic stimulus        | 0.016        |
|         | GO:0051707 | response to other organism                  | 0.016        |
|         | GO:0009862 | systemic acquired resistance, salicylic ... | 0.018        |
|         | GO:1903825 | organic acid transmembrane transport        | 0.019        |
|         | GO:0098656 | anion transmembrane transport               | 0.022        |
|         | GO:0015849 | organic acid transport                      | 0.022        |
|         | GO:0036293 | response to decreased oxygen levels         | 0.023        |
|         | GO:0042537 | benzene-containing compound metabolic pr... | 0.025        |

Continued on next page

| GO type | GO ID      | Description                                 | Adj. p-value |
|---------|------------|---------------------------------------------|--------------|
|         | GO:0000162 | tryptophan biosynthetic process             | 0.026        |
|         | GO:0016143 | S-glycoside metabolic process               | 0.026        |
|         | GO:0019757 | glycosinolate metabolic process             | 0.026        |
|         | GO:0019760 | glucosinolate metabolic process             | 0.026        |
|         | GO:0042435 | indole-containing compound biosynthetic ... | 0.026        |
|         | GO:0046219 | indolalkylamine biosynthetic process        | 0.026        |
|         | GO:0030162 | regulation of proteolysis                   | 0.027        |
|         | GO:0009309 | amine biosynthetic process                  | 0.031        |
|         | GO:0042401 | cellular biogenic amine biosynthetic pro... | 0.031        |
|         | GO:0042445 | hormone metabolic process                   | 0.034        |
|         | GO:1902022 | L-lysine transport                          | 0.034        |
|         | GO:1903401 | L-lysine transmembrane transport            | 0.034        |
|         | GO:0017001 | antibiotic catabolic process                | 0.034        |
|         | GO:0009856 | pollination                                 | 0.037        |
|         | GO:0044706 | multi-multicellular organism process        | 0.037        |
|         | GO:0009056 | catabolic process                           | 0.038        |
|         | GO:0009698 | phenylpropanoid metabolic process           | 0.038        |
|         | GO:0042447 | hormone catabolic process                   | 0.039        |
|         | GO:0044248 | cellular catabolic process                  | 0.047        |
|         | GO:0034219 | carbohydrate transmembrane transport        | 0.048        |
|         | GO:0006790 | sulfur compound metabolic process           | 0.055        |
|         | GO:0043666 | regulation of phosphoprotein phosphatase... | 0.076        |
|         | GO:0006465 | signal peptide processing                   | 0.080        |
|         | GO:0015706 | nitrate transport                           | 0.080        |
|         | GO:0051187 | cofactor catabolic process                  | 0.080        |
|         | GO:0042744 | hydrogen peroxide catabolic process         | 0.084        |
|         | GO:0080163 | regulation of protein serine/threonine p... | 0.084        |
|         | GO:0071944 | cell periphery                              | 0.000        |
|         | GO:0000323 | lytic vacuole                               | 0.000        |
| CC      | GO:0031226 | intrinsic component of plasma membrane      | 0.004        |
|         | GO:0044421 | extracellular region part                   | 0.004        |
|         | GO:0044459 | plasma membrane part                        | 0.030        |
|         | GO:0046906 | tetrapyrrole binding                        | 0.000        |
|         | GO:0016705 | oxidoreductase activity, acting on paire... | 0.000        |
|         | GO:0022857 | transmembrane transporter activity          | 0.000        |
|         | GO:0005215 | transporter activity                        | 0.000        |
|         | GO:0030414 | peptidase inhibitor activity                | 0.000        |
|         | GO:0061134 | peptidase regulator activity                | 0.000        |
|         | GO:0015291 | secondary active transmembrane transport... | 0.000        |
|         | GO:0022804 | active transmembrane transporter activit... | 0.000        |
|         | GO:0043565 | sequence-specific DNA binding               | 0.000        |
|         | GO:0015149 | hexose transmembrane transporter activit... | 0.001        |
|         | GO:0015171 | amino acid transmembrane transporter act... | 0.001        |
|         | GO:0015145 | monosaccharide transmembrane transporter... | 0.001        |
|         | GO:0016829 | lyase activity                              | 0.002        |
|         | GO:0005355 | glucose transmembrane transporter activi... | 0.002        |
|         | GO:0004190 | aspartic-type endopeptidase activity        | 0.002        |
|         | GO:0070001 | aspartic-type peptidase activity            | 0.002        |
|         | GO:0015075 | ion transmembrane transporter activity      | 0.002        |

Continued on next page

| GO type | GO ID      | Description                                 | Adj. p-value |
|---------|------------|---------------------------------------------|--------------|
|         | GO:0008194 | UDP-glycosyltransferase activity            | 0.003        |
|         | GO:0001067 | regulatory region nucleic acid binding      | 0.003        |
|         | GO:0044212 | transcription regulatory region DNA bind... | 0.003        |
|         | GO:0046527 | glucosyltransferase activity                | 0.003        |
|         | GO:0016765 | transferase activity, transferring alkyl... | 0.003        |
|         | GO:0015295 | solute:proton symporter activity            | 0.004        |
|         | GO:0005351 | carbohydrate:proton symporter activity      | 0.004        |
|         | GO:0005402 | carbohydrate:cation symporter activity      | 0.004        |
|         | GO:0051119 | sugar transmembrane transporter activity    | 0.004        |
|         | GO:0015172 | acidic amino acid transmembrane transpor... | 0.005        |
|         | GO:0016682 | oxidoreductase activity, acting on diphe... | 0.005        |
|         | GO:0015318 | inorganic molecular entity transmembrane... | 0.010        |
|         | GO:0015293 | symporter activity                          | 0.011        |
|         | GO:0015181 | arginine transmembrane transporter activ... | 0.013        |
|         | GO:0015189 | L-lysine transmembrane transporter activ... | 0.013        |
|         | GO:0001046 | core promoter sequence-specific DNA bind... | 0.014        |
|         | GO:0003959 | NADPH dehydrogenase activity                | 0.014        |
|         | GO:0015294 | solute:cation symporter activity            | 0.014        |
|         | GO:0016863 | intramolecular oxidoreductase activity, ... | 0.020        |
|         | GO:0046943 | carboxylic acid transmembrane transporte... | 0.022        |
|         | GO:0001047 | core promoter binding                       | 0.023        |
|         | GO:0042562 | hormone binding                             | 0.024        |
|         | GO:0016679 | oxidoreductase activity, acting on diphe... | 0.025        |
|         | GO:0004864 | protein phosphatase inhibitor activity      | 0.029        |
|         | GO:0019212 | phosphatase inhibitor activity              | 0.029        |
|         | GO:0016841 | ammonia-lyase activity                      | 0.031        |
|         | GO:0008233 | peptidase activity                          | 0.032        |
|         | GO:0036094 | small molecule binding                      | 0.033        |
|         | GO:0016838 | carbon-oxygen lyase activity, acting on ... | 0.034        |
|         | GO:0005342 | organic acid transmembrane transporter a... | 0.038        |
|         | GO:0015174 | basic amino acid transmembrane transport... | 0.042        |
|         | GO:0001228 | transcriptional activator activity, RNA ... | 0.046        |
|         | GO:0015297 | antiporter activity                         | 0.047        |
|         | GO:0070008 | serine-type exopeptidase activity           | 0.048        |
|         | GO:0019208 | phosphatase regulator activity              | 0.049        |
|         | GO:0019888 | protein phosphatase regulator activity      | 0.049        |
|         | GO:0070011 | peptidase activity, acting on L-amino ac... | 0.050        |
|         | GO:0008324 | cation transmembrane transporter activit... | 0.053        |
|         | GO:0015144 | carbohydrate transmembrane transporter a... | 0.053        |
|         | GO:0016746 | transferase activity, transferring acyl ... | 0.054        |
|         | GO:0005326 | neurotransmitter transporter activity       | 0.057        |
|         | GO:0000166 | nucleotide binding                          | 0.060        |
|         | GO:1901265 | nucleoside phosphate binding                | 0.060        |
|         | GO:0000981 | RNA polymerase II transcription factor a... | 0.061        |
|         | GO:0008483 | transaminase activity                       | 0.065        |
|         | GO:0008514 | organic anion transmembrane transporter ... | 0.065        |
|         | GO:0016769 | transferase activity, transferring nitro... | 0.065        |
|         | GO:0052716 | hydroquinone:oxygen oxidoreductase activ... | 0.065        |
|         | GO:0004871 | signal transducer activity                  | 0.075        |

Continued on next page

| GO type | GO ID      | Description                                 | Adj. p-value |
|---------|------------|---------------------------------------------|--------------|
|         | GO:0004185 | serine-type carboxypeptidase activity       | 0.081        |
|         | GO:0005385 | zinc ion transmembrane transporter activ... | 0.081        |
|         | GO:0008509 | anion transmembrane transporter activity    | 0.081        |
|         | GO:0019840 | isoprenoid binding                          | 0.090        |
|         | GO:0016758 | transferase activity, transferring hexos... | 0.092        |
|         | GO:0046915 | transition metal ion transmembrane trans... | 0.092        |
|         | GO:0030594 | neurotransmitter receptor activity          | 0.094        |

### 4.3.3 Root - Preflowering - Cluster 3

| GO type | GO ID      | Description                                  | Adj. p-value |
|---------|------------|----------------------------------------------|--------------|
|         | GO:0010383 | cell wall polysaccharide metabolic proces... | 0.000        |
|         | GO:0044262 | cellular carbohydrate metabolic process      | 0.000        |
|         | GO:0007017 | microtubule-based process                    | 0.000        |
|         | GO:0097237 | cellular response to toxic substance         | 0.000        |
|         | GO:0009832 | plant-type cell wall biogenesis              | 0.000        |
|         | GO:0072330 | monocarboxylic acid biosynthetic process     | 0.000        |
|         | GO:0000902 | cell morphogenesis                           | 0.000        |
|         | GO:0007010 | cytoskeleton organization                    | 0.000        |
|         | GO:0006754 | ATP biosynthetic process                     | 0.000        |
|         | GO:0016049 | cell growth                                  | 0.000        |
|         | GO:0030243 | cellulose metabolic process                  | 0.000        |
|         | GO:1902600 | proton transmembrane transport               | 0.000        |
|         | GO:0051273 | beta-glucan metabolic process                | 0.000        |
|         | GO:0046434 | organophosphate catabolic process            | 0.000        |
|         | GO:0070592 | cell wall polysaccharide biosynthetic pr...  | 0.000        |
|         | GO:0009699 | phenylpropanoid biosynthetic process         | 0.000        |
|         | GO:0019318 | hexose metabolic process                     | 0.000        |
|         | GO:1903047 | mitotic cell cycle process                   | 0.000        |
|         | GO:0000281 | mitotic cytokinesis                          | 0.000        |
|         | GO:0016053 | organic acid biosynthetic process            | 0.000        |
|         | GO:0046394 | carboxylic acid biosynthetic process         | 0.000        |
|         | GO:0006631 | fatty acid metabolic process                 | 0.000        |
|         | GO:0046496 | nicotinamide nucleotide metabolic proces...  | 0.000        |
|         | GO:0000910 | cytokinesis                                  | 0.000        |
|         | GO:0019362 | pyridine nucleotide metabolic process        | 0.000        |
|         | GO:0009826 | unidimensional cell growth                   | 0.000        |
|         | GO:0006733 | oxidoreduction coenzyme metabolic proces...  | 0.000        |
|         | GO:0044283 | small molecule biosynthetic process          | 0.000        |
|         | GO:0048468 | cell development                             | 0.000        |
|         | GO:0090558 | plant epidermis development                  | 0.000        |
|         | GO:0045492 | xylan biosynthetic process                   | 0.000        |
|         | GO:0048868 | pollen tube development                      | 0.000        |
|         | GO:0051301 | cell division                                | 0.000        |
|         | GO:0006633 | fatty acid biosynthetic process              | 0.000        |
|         | GO:0044247 | cellular polysaccharide catabolic proces...  | 0.000        |
|         | GO:0006979 | response to oxidative stress                 | 0.000        |
|         | GO:0097435 | supramolecular fiber organization            | 0.000        |
|         | GO:0000904 | cell morphogenesis involved in different...  | 0.000        |
|         | GO:0048193 | Golgi vesicle transport                      | 0.001        |
|         | GO:0008154 | actin polymerization or depolymerization     | 0.001        |
|         | GO:0019748 | secondary metabolic process                  | 0.001        |
|         | GO:0072525 | pyridine-containing compound biosyntheti...  | 0.001        |
|         | GO:0006090 | pyruvate metabolic process                   | 0.001        |
|         | GO:0009225 | nucleotide-sugar metabolic process           | 0.001        |
|         | GO:0006884 | cell volume homeostasis                      | 0.002        |
|         | GO:0009992 | cellular water homeostasis                   | 0.002        |

Continued on next page

| GO type | GO ID      | Description                                 | Adj. p-value |
|---------|------------|---------------------------------------------|--------------|
|         | GO:0010103 | stomatal complex morphogenesis              | 0.002        |
|         | GO:0015793 | glycerol transport                          | 0.002        |
|         | GO:0051186 | cofactor metabolic process                  | 0.002        |
|         | GO:0098660 | inorganic ion transmembrane transport       | 0.002        |
|         | GO:0006833 | water transport                             | 0.002        |
|         | GO:0042044 | fluid transport                             | 0.002        |
|         | GO:0009251 | glucan catabolic process                    | 0.002        |
|         | GO:0008064 | regulation of actin polymerization or de... | 0.003        |
|         | GO:0030832 | regulation of actin filament length         | 0.003        |
|         | GO:0032956 | regulation of actin cytoskeleton organiz... | 0.003        |
|         | GO:0032970 | regulation of actin filament-based proce... | 0.003        |
|         | GO:0110053 | regulation of actin filament organizatio... | 0.003        |
|         | GO:0090627 | plant epidermal cell differentiation        | 0.003        |
|         | GO:0006119 | oxidative phosphorylation                   | 0.003        |
|         | GO:0042773 | ATP synthesis coupled electron transport    | 0.003        |
|         | GO:0071840 | cellular component organization or bioge... | 0.003        |
|         | GO:0048856 | anatomical structure development            | 0.003        |
|         | GO:0048588 | developmental cell growth                   | 0.003        |
|         | GO:0006101 | citrate metabolic process                   | 0.003        |
|         | GO:0007015 | actin filament organization                 | 0.003        |
|         | GO:0015791 | polyol transport                            | 0.003        |
|         | GO:0098662 | inorganic cation transmembrane transport    | 0.003        |
|         | GO:0030029 | actin filament-based process                | 0.003        |
|         | GO:0030245 | cellulose catabolic process                 | 0.003        |
|         | GO:0030258 | lipid modification                          | 0.003        |
|         | GO:0034404 | nucleobase-containing small molecule bio... | 0.003        |
|         | GO:0006732 | coenzyme metabolic process                  | 0.003        |
|         | GO:0044550 | secondary metabolite biosynthetic proces... | 0.003        |
|         | GO:0010374 | stomatal complex development                | 0.004        |
|         | GO:0010052 | guard cell differentiation                  | 0.004        |
|         | GO:0051493 | regulation of cytoskeleton organization     | 0.004        |
|         | GO:0022603 | regulation of anatomical structure morph... | 0.004        |
|         | GO:0030036 | actin cytoskeleton organization             | 0.004        |
|         | GO:0042545 | cell wall modification                      | 0.004        |
|         | GO:0080147 | root hair cell development                  | 0.005        |
|         | GO:0051235 | maintenance of location                     | 0.005        |
|         | GO:0051258 | protein polymerization                      | 0.005        |
|         | GO:0030041 | actin filament polymerization               | 0.005        |
|         | GO:0030833 | regulation of actin filament polymerizat... | 0.005        |
|         | GO:0051275 | beta-glucan catabolic process               | 0.005        |
|         | GO:0044255 | cellular lipid metabolic process            | 0.005        |
|         | GO:0009808 | lignin metabolic process                    | 0.006        |
|         | GO:0042775 | mitochondrial ATP synthesis coupled elec... | 0.006        |
|         | GO:0034220 | ion transmembrane transport                 | 0.007        |
|         | GO:0000226 | microtubule cytoskeleton organization       | 0.007        |
|         | GO:0008361 | regulation of cell size                     | 0.007        |
|         | GO:0090407 | organophosphate biosynthetic process        | 0.007        |
|         | GO:0022904 | respiratory electron transport chain        | 0.008        |
|         | GO:0030154 | cell differentiation                        | 0.008        |

Continued on next page

| GO type | GO ID      | Description                                 | Adj. p-value |
|---------|------------|---------------------------------------------|--------------|
|         | GO:0035556 | intracellular signal transduction           | 0.008        |
|         | GO:0022604 | regulation of cell morphogenesis            | 0.008        |
|         | GO:0006099 | tricarboxylic acid cycle                    | 0.008        |
|         | GO:0007049 | cell cycle                                  | 0.008        |
|         | GO:1902903 | regulation of supramolecular fiber organ... | 0.008        |
|         | GO:1903338 | regulation of cell wall organization or ... | 0.009        |
|         | GO:0009060 | aerobic respiration                         | 0.009        |
|         | GO:0048469 | cell maturation                             | 0.009        |
|         | GO:0048764 | trichoblast maturation                      | 0.009        |
|         | GO:0048765 | root hair cell differentiation              | 0.009        |
|         | GO:0022622 | root system development                     | 0.011        |
|         | GO:0048767 | root hair elongation                        | 0.011        |
|         | GO:0018105 | peptidyl-serine phosphorylation             | 0.011        |
|         | GO:0010413 | glucuronoxylan metabolic process            | 0.011        |
|         | GO:0010417 | glucuronoxylan biosynthetic process         | 0.011        |
|         | GO:0006270 | DNA replication initiation                  | 0.011        |
|         | GO:0010191 | mucilage metabolic process                  | 0.012        |
|         | GO:0005984 | disaccharide metabolic process              | 0.012        |
|         | GO:0065008 | regulation of biological quality            | 0.012        |
|         | GO:0015980 | energy derivation by oxidation of organi... | 0.012        |
|         | GO:0010054 | trichoblast differentiation                 | 0.013        |
|         | GO:0010026 | trichome differentiation                    | 0.013        |
|         | GO:0032502 | developmental process                       | 0.013        |
|         | GO:0048278 | vesicle docking                             | 0.013        |
|         | GO:0010215 | cellulose microfibril organization          | 0.013        |
|         | GO:0019321 | pentose metabolic process                   | 0.014        |
|         | GO:0019752 | carboxylic acid metabolic process           | 0.014        |
|         | GO:0016042 | lipid catabolic process                     | 0.014        |
|         | GO:0006891 | intra-Golgi vesicle-mediated transport      | 0.014        |
|         | GO:0052546 | cell wall pectin metabolic process          | 0.014        |
|         | GO:0048364 | root development                            | 0.014        |
|         | GO:2000652 | regulation of secondary cell wall biogen... | 0.014        |
|         | GO:0009250 | glucan biosynthetic process                 | 0.017        |
|         | GO:0008643 | carbohydrate transport                      | 0.017        |
|         | GO:0006644 | phospholipid metabolic process              | 0.017        |
|         | GO:0018209 | peptidyl-serine modification                | 0.017        |
|         | GO:0051510 | regulation of unidimensional cell growth    | 0.017        |
|         | GO:0046470 | phosphatidylcholine metabolic process       | 0.018        |
|         | GO:0046854 | phosphatidylinositol phosphorylation        | 0.018        |
|         | GO:0009934 | regulation of meristem structural organi... | 0.018        |
|         | GO:0044703 | multi-organism reproductive process         | 0.018        |
|         | GO:0010214 | seed coat development                       | 0.019        |
|         | GO:0032271 | regulation of protein polymerization        | 0.019        |
|         | GO:0009108 | coenzyme biosynthetic process               | 0.020        |
|         | GO:0006006 | glucose metabolic process                   | 0.021        |
|         | GO:0009932 | cell tip growth                             | 0.021        |
|         | GO:0022406 | membrane docking                            | 0.021        |
|         | GO:0140056 | organelle localization by membrane tethe... | 0.021        |
|         | GO:0008610 | lipid biosynthetic process                  | 0.022        |

Continued on next page



| GO type | GO ID      | Description                                 | Adj. p-value |
|---------|------------|---------------------------------------------|--------------|
|         | GO:0009056 | catabolic process                           | 0.022        |
|         | GO:0010192 | mucilage biosynthetic process               | 0.023        |
|         | GO:0051129 | negative regulation of cellular componen... | 0.023        |
|         | GO:0006811 | ion transport                               | 0.023        |
|         | GO:0043436 | oxoacid metabolic process                   | 0.025        |
|         | GO:0009395 | phospholipid catabolic process              | 0.025        |
|         | GO:0006082 | organic acid metabolic process              | 0.025        |
|         | GO:0019953 | sexual reproduction                         | 0.026        |
|         | GO:0046486 | glycerolipid metabolic process              | 0.027        |
|         | GO:0070726 | cell wall assembly                          | 0.027        |
|         | GO:0071668 | plant-type cell wall assembly               | 0.027        |
|         | GO:0043647 | inositol phosphate metabolic process        | 0.027        |
|         | GO:0009860 | pollen tube growth                          | 0.028        |
|         | GO:0006812 | cation transport                            | 0.030        |
|         | GO:0015850 | organic hydroxy compound transport          | 0.030        |
|         | GO:0006650 | glycerophospholipid metabolic process       | 0.030        |
|         | GO:0071470 | cellular response to osmotic stress         | 0.030        |
|         | GO:1901615 | organic hydroxy compound metabolic proce... | 0.030        |
|         | GO:0072350 | tricarboxylic acid metabolic process        | 0.031        |
|         | GO:0031407 | oxylipin metabolic process                  | 0.032        |
|         | GO:0070887 | cellular response to chemical stimulus      | 0.032        |
|         | GO:0010053 | root epidermal cell differentiation         | 0.032        |
|         | GO:0010256 | endomembrane system organization            | 0.033        |
|         | GO:0009555 | pollen development                          | 0.038        |
|         | GO:0019751 | polyol metabolic process                    | 0.038        |
|         | GO:0009100 | glycoprotein metabolic process              | 0.038        |
|         | GO:0055082 | cellular chemical homeostasis               | 0.038        |
|         | GO:0009226 | nucleotide-sugar biosynthetic process       | 0.039        |
|         | GO:0044770 | cell cycle phase transition                 | 0.039        |
|         | GO:0010090 | trichome morphogenesis                      | 0.040        |
|         | GO:0007030 | Golgi organization                          | 0.040        |
|         | GO:0090698 | post-embryonic plant morphogenesis          | 0.040        |
|         | GO:0010345 | suberin biosynthetic process                | 0.040        |
|         | GO:0046834 | lipid phosphorylation                       | 0.042        |
|         | GO:0019566 | arabinose metabolic process                 | 0.042        |
|         | GO:0048359 | mucilage metabolic process involved in s... | 0.045        |
|         | GO:0030198 | extracellular matrix organization           | 0.045        |
|         | GO:0043062 | extracellular structure organization        | 0.045        |
|         | GO:0046173 | polyol biosynthetic process                 | 0.047        |
|         | GO:0098655 | cation transmembrane transport              | 0.048        |
|         | GO:0010564 | regulation of cell cycle process            | 0.051        |
|         | GO:0031408 | oxylipin biosynthetic process               | 0.051        |
|         | GO:0019915 | lipid storage                               | 0.052        |
|         | GO:1901617 | organic hydroxy compound biosynthetic pr... | 0.052        |
|         | GO:0021700 | developmental maturation                    | 0.053        |
|         | GO:0044772 | mitotic cell cycle phase transition         | 0.054        |
|         | GO:0046365 | monosaccharide catabolic process            | 0.058        |
|         | GO:0015985 | energy coupled proton transport, down el... | 0.060        |
|         | GO:0015986 | ATP synthesis coupled proton transport      | 0.060        |

Continued on next page

| GO type | GO ID      | Description                                 | Adj. p-value |
|---------|------------|---------------------------------------------|--------------|
|         | GO:0048878 | chemical homeostasis                        | 0.064        |
|         | GO:0034765 | regulation of ion transmembrane transpor... | 0.064        |
|         | GO:0051716 | cellular response to stimulus               | 0.065        |
|         | GO:0009741 | response to brassinosteroid                 | 0.067        |
|         | GO:0030641 | regulation of cellular pH                   | 0.070        |
|         | GO:0051453 | regulation of intracellular pH              | 0.070        |
|         | GO:0018904 | ether metabolic process                     | 0.075        |
|         | GO:0006108 | malate metabolic process                    | 0.080        |
|         | GO:0010639 | negative regulation of organelle organiz... | 0.082        |
|         | GO:0030004 | cellular monovalent inorganic cation hom... | 0.083        |
|         | GO:0005996 | monosaccharide metabolic process            | 0.084        |
|         | GO:0008356 | asymmetric cell division                    | 0.087        |
|         | GO:0044248 | cellular catabolic process                  | 0.091        |
|         | GO:0046835 | carbohydrate phosphorylation                | 0.091        |
|         | GO:0070085 | glycosylation                               | 0.091        |
|         | GO:0071695 | anatomical structure maturation             | 0.091        |
|         | GO:0006793 | phosphorus metabolic process                | 0.098        |
|         | GO:0006536 | glutamate metabolic process                 | 0.098        |
|         | GO:0016020 | membrane                                    | 0.000        |
|         | GO:0098791 | Golgi subcompartment                        | 0.000        |
|         | GO:0044425 | membrane part                               | 0.000        |
|         | GO:0005773 | vacuole                                     | 0.000        |
|         | GO:0031225 | anchored component of membrane              | 0.000        |
|         | GO:0044437 | vacuolar part                               | 0.000        |
|         | GO:0033178 | proton-transporting two-sector ATPase co... | 0.000        |
|         | GO:0005768 | endosome                                    | 0.000        |
|         | GO:0033180 | proton-transporting V-type ATPase, V1 do... | 0.001        |
|         | GO:0044433 | cytoplasmic vesicle part                    | 0.001        |
|         | GO:0030660 | Golgi-associated vesicle membrane           | 0.001        |
|         | GO:0009504 | cell plate                                  | 0.002        |
|         | GO:0005769 | early endosome                              | 0.002        |
|         | GO:0070069 | cytochrome complex                          | 0.003        |
|         | GO:0005876 | spindle microtubule                         | 0.003        |
|         | GO:0005881 | cytoplasmic microtubule                     | 0.004        |
| CC      | GO:0030863 | cortical cytoskeleton                       | 0.004        |
|         | GO:0030981 | cortical microtubule cytoskeleton           | 0.004        |
|         | GO:0005819 | spindle                                     | 0.004        |
|         | GO:0055028 | cortical microtubule                        | 0.005        |
|         | GO:0005753 | mitochondrial proton-transporting ATP sy... | 0.007        |
|         | GO:0030136 | clathrin-coated vesicle                     | 0.008        |
|         | GO:0009705 | plant-type vacuole membrane                 | 0.015        |
|         | GO:0033177 | proton-transporting two-sector ATPase co... | 0.016        |
|         | GO:0030658 | transport vesicle membrane                  | 0.023        |
|         | GO:0009574 | preprophase band                            | 0.023        |
|         | GO:0000325 | plant-type vacuole                          | 0.030        |
|         | GO:0000775 | chromosome, centromeric region              | 0.033        |
|         | GO:0030133 | transport vesicle                           | 0.036        |
|         | GO:0005798 | Golgi-associated vesicle                    | 0.052        |
|         | GO:0045259 | proton-transporting ATP synthase complex    | 0.070        |

Continued on next page

| GO type | GO ID      | Description                                 | Adj. p-value |
|---------|------------|---------------------------------------------|--------------|
|         | GO:0042995 | cell projection                             | 0.079        |
|         | GO:0120025 | plasma membrane bounded cell projection     | 0.079        |
|         | GO:0090406 | pollen tube                                 | 0.086        |
|         | GO:0016757 | transferase activity, transferring glyco... | 0.000        |
|         | GO:0015077 | monovalent inorganic cation transmembran... | 0.000        |
|         | GO:0015078 | proton transmembrane transporter activit... | 0.000        |
|         | GO:0005372 | water transmembrane transporter activity    | 0.001        |
|         | GO:0015250 | water channel activity                      | 0.001        |
|         | GO:0015254 | glycerol channel activity                   | 0.001        |
|         | GO:0015926 | glucosidase activity                        | 0.001        |
|         | GO:0046906 | tetrapyrrole binding                        | 0.001        |
|         | GO:0004567 | beta-mannosidase activity                   | 0.002        |
|         | GO:0009055 | electron transfer activity                  | 0.002        |
|         | GO:0005085 | guanyl-nucleotide exchange factor activi... | 0.002        |
|         | GO:0015168 | glycerol transmembrane transporter activ... | 0.002        |
|         | GO:0016758 | transferase activity, transferring hexos... | 0.002        |
|         | GO:0016759 | cellulose synthase activity                 | 0.002        |
|         | GO:0016760 | cellulose synthase (UDP-forming) activit... | 0.002        |
|         | GO:0008146 | sulfotransferase activity                   | 0.003        |
|         | GO:0015267 | channel activity                            | 0.003        |
|         | GO:0015318 | inorganic molecular entity transmembrane... | 0.003        |
|         | GO:0016788 | hydrolase activity, acting on ester bond... | 0.003        |
|         | GO:0022803 | passive transmembrane transporter activi... | 0.003        |
|         | GO:0022838 | substrate-specific channel activity         | 0.003        |
|         | GO:0020037 | heme binding                                | 0.003        |
|         | GO:0046910 | pectinesterase inhibitor activity           | 0.003        |
|         | GO:0015166 | polyol transmembrane transporter activit... | 0.003        |
|         | GO:0016857 | racemase and epimerase activity, acting ... | 0.003        |
|         | GO:0005088 | Ras guanyl-nucleotide exchange factor ac... | 0.004        |
|         | GO:0015144 | carbohydrate transmembrane transporter a... | 0.004        |
|         | GO:0030276 | clathrin binding                            | 0.004        |
|         | GO:0030599 | pectinesterase activity                     | 0.004        |
|         | GO:0008810 | cellulase activity                          | 0.005        |
|         | GO:1901618 | organic hydroxy compound transmembrane t... | 0.006        |
|         | GO:0008422 | beta-glucosidase activity                   | 0.007        |
|         | GO:0008324 | cation transmembrane transporter activit... | 0.008        |
|         | GO:0016717 | oxidoreductase activity, acting on paire... | 0.008        |
|         | GO:0015923 | mannosidase activity                        | 0.008        |
| MF      | GO:0008081 | phosphoric diester hydrolase activity       | 0.009        |
|         | GO:0051020 | GTPase binding                              | 0.010        |
|         | GO:0016307 | phosphatidylinositol phosphate kinase ac... | 0.013        |
|         | GO:0042285 | xylosyltransferase activity                 | 0.013        |
|         | GO:0016854 | racemase and epimerase activity             | 0.013        |
|         | GO:1901681 | sulfur compound binding                     | 0.014        |
|         | GO:0042349 | guiding stereospecific synthesis activit... | 0.016        |
|         | GO:0005509 | calcium ion binding                         | 0.016        |
|         | GO:0016722 | oxidoreductase activity, oxidizing metal... | 0.017        |
|         | GO:0019203 | carbohydrate phosphatase activity           | 0.019        |
|         | GO:0046527 | glucosyltransferase activity                | 0.020        |

Continued on next page

| GO type | GO ID      | Description                                 | Adj. p-value |
|---------|------------|---------------------------------------------|--------------|
|         | GO:0070569 | uridylyltransferase activity                | 0.021        |
|         | GO:0016791 | phosphatase activity                        | 0.021        |
|         | GO:0016835 | carbon-oxygen lyase activity                | 0.022        |
|         | GO:0015020 | glucuronosyltransferase activity            | 0.025        |
|         | GO:0016615 | malate dehydrogenase activity               | 0.025        |
|         | GO:0005215 | transporter activity                        | 0.025        |
|         | GO:0098772 | molecular function regulator                | 0.029        |
|         | GO:0019200 | carbohydrate kinase activity                | 0.029        |
|         | GO:0051015 | actin filament binding                      | 0.030        |
|         | GO:0004743 | pyruvate kinase activity                    | 0.042        |
|         | GO:0015018 | galactosylgalactosylxylosylprotein 3-bet... | 0.042        |
|         | GO:0030955 | potassium ion binding                       | 0.042        |
|         | GO:0031420 | alkali metal ion binding                    | 0.042        |
|         | GO:0017016 | Ras GTPase binding                          | 0.043        |
|         | GO:0031267 | small GTPase binding                        | 0.043        |
|         | GO:0016417 | S-acyltransferase activity                  | 0.050        |
|         | GO:0046933 | proton-transporting ATP synthase activit... | 0.052        |
|         | GO:0005200 | structural constituent of cytoskeleton      | 0.058        |
|         | GO:0008194 | UDP-glycosyltransferase activity            | 0.058        |
|         | GO:0008378 | galactosyltransferase activity              | 0.060        |
|         | GO:0008047 | enzyme activator activity                   | 0.067        |
|         | GO:0016740 | transferase activity                        | 0.071        |
|         | GO:0043168 | anion binding                               | 0.076        |
|         | GO:0052716 | hydroquinone:oxygen oxidoreductase activ... | 0.076        |
|         | GO:0004620 | phospholipase activity                      | 0.097        |
|         | GO:0008171 | O-methyltransferase activity                | 0.100        |

#### 4.3.4 Root - Preflowering - Cluster 4

| GO type | GO ID      | Description                                 | Adj. p-value |
|---------|------------|---------------------------------------------|--------------|
|         | GO:1903506 | regulation of nucleic acid-templated tra... | 0.000        |
|         | GO:0009753 | response to jasmonic acid                   | 0.000        |
|         | GO:0071229 | cellular response to acid chemical          | 0.000        |
|         | GO:0009751 | response to salicylic acid                  | 0.000        |
|         | GO:0009867 | jasmonic acid mediated signaling pathway    | 0.000        |
|         | GO:0009312 | oligosaccharide biosynthetic process        | 0.001        |
|         | GO:0042537 | benzene-containing compound metabolic pr... | 0.002        |
|         | GO:0019538 | protein metabolic process                   | 0.003        |
|         | GO:0005992 | trehalose biosynthetic process              | 0.003        |
|         | GO:0042447 | hormone catabolic process                   | 0.003        |
|         | GO:0009862 | systemic acquired resistance, salicylic ... | 0.004        |
|         | GO:0034654 | nucleobase-containing compound biosynthe... | 0.004        |
|         | GO:0044267 | cellular protein metabolic process          | 0.004        |
|         | GO:0003333 | amino acid transmembrane transport          | 0.004        |
|         | GO:0006865 | amino acid transport                        | 0.004        |
|         | GO:0007165 | signal transduction                         | 0.004        |
|         | GO:0010468 | regulation of gene expression               | 0.004        |
|         | GO:0031347 | regulation of defense response              | 0.005        |
|         | GO:0001101 | response to acid chemical                   | 0.005        |
|         | GO:0005991 | trehalose metabolic process                 | 0.005        |
|         | GO:0046351 | disaccharide biosynthetic process           | 0.005        |
|         | GO:1901701 | cellular response to oxygen-containing c... | 0.005        |
|         | GO:0019222 | regulation of metabolic process             | 0.005        |
|         | GO:0023052 | signaling                                   | 0.005        |
|         | GO:0009814 | defense response, incompatible interacti... | 0.006        |
|         | GO:0019438 | aromatic compound biosynthetic process      | 0.006        |
|         | GO:0042445 | hormone metabolic process                   | 0.009        |
|         | GO:0009072 | aromatic amino acid family metabolic pro... | 0.010        |
|         | GO:0071215 | cellular response to abscisic acid stimu... | 0.010        |
|         | GO:0097306 | cellular response to alcohol                | 0.010        |
|         | GO:0009696 | salicylic acid metabolic process            | 0.011        |
|         | GO:0046677 | response to antibiotic                      | 0.011        |
|         | GO:0071446 | cellular response to salicylic acid stim... | 0.012        |
|         | GO:0009605 | response to external stimulus               | 0.014        |
|         | GO:0051704 | multi-organism process                      | 0.014        |
|         | GO:0009863 | salicylic acid mediated signaling pathwa... | 0.014        |
|         | GO:0009617 | response to bacterium                       | 0.015        |
| BP      | GO:0032787 | monocarboxylic acid metabolic process       | 0.015        |
|         | GO:1901362 | organic cyclic compound biosynthetic pro... | 0.015        |
|         | GO:0006040 | amino sugar metabolic process               | 0.017        |
|         | GO:0043648 | dicarboxylic acid metabolic process         | 0.018        |
|         | GO:0042737 | drug catabolic process                      | 0.018        |
|         | GO:0009636 | response to toxic substance                 | 0.019        |
|         | GO:1901698 | response to nitrogen compound               | 0.019        |
|         | GO:0009620 | response to fungus                          | 0.019        |
|         | GO:0018130 | heterocycle biosynthetic process            | 0.020        |

Continued on next page

| GO type | GO ID      | Description                                 | Adj. p-value |
|---------|------------|---------------------------------------------|--------------|
|         | GO:0046942 | carboxylic acid transport                   | 0.024        |
|         | GO:0043436 | oxoacid metabolic process                   | 0.025        |
|         | GO:0006082 | organic acid metabolic process              | 0.030        |
|         | GO:0050832 | defense response to fungus                  | 0.030        |
|         | GO:1905039 | carboxylic acid transmembrane transport     | 0.032        |
|         | GO:0002831 | regulation of response to biotic stimulu... | 0.033        |
|         | GO:0009755 | hormone-mediated signaling pathway          | 0.033        |
|         | GO:0006575 | cellular modified amino acid metabolic p... | 0.034        |
|         | GO:0055114 | oxidation-reduction process                 | 0.035        |
|         | GO:0015893 | drug transport                              | 0.037        |
|         | GO:0015849 | organic acid transport                      | 0.039        |
|         | GO:0035304 | regulation of protein dephosphorylation     | 0.040        |
|         | GO:1901700 | response to oxygen-containing compound      | 0.042        |
|         | GO:0055081 | anion homeostasis                           | 0.046        |
|         | GO:0032101 | regulation of response to external stimu... | 0.048        |
|         | GO:1903825 | organic acid transmembrane transport        | 0.052        |
|         | GO:0080163 | regulation of protein serine/threonine p... | 0.057        |
|         | GO:0002237 | response to molecule of bacterial origin    | 0.058        |
|         | GO:0001666 | response to hypoxia                         | 0.060        |
|         | GO:0015711 | organic anion transport                     | 0.061        |
|         | GO:0009311 | oligosaccharide metabolic process           | 0.062        |
|         | GO:0043666 | regulation of phosphoprotein phosphatase... | 0.070        |
|         | GO:0071236 | cellular response to antibiotic             | 0.071        |
|         | GO:0009991 | response to extracellular stimulus          | 0.077        |
|         | GO:0009698 | phenylpropanoid metabolic process           | 0.078        |
|         | GO:0050896 | response to stimulus                        | 0.080        |
|         | GO:0035303 | regulation of dephosphorylation             | 0.080        |
|         | GO:0070482 | response to oxygen levels                   | 0.080        |
|         | GO:0006811 | ion transport                               | 0.081        |
|         | GO:0071396 | cellular response to lipid                  | 0.091        |
| CC      | GO:0005576 | extracellular region                        | 0.003        |
|         | GO:0044421 | extracellular region part                   | 0.018        |
|         | GO:0022857 | transmembrane transporter activity          | 0.000        |
|         | GO:0016831 | carboxy-lyase activity                      | 0.000        |
|         | GO:0022804 | active transmembrane transporter activit... | 0.000        |
|         | GO:0044212 | transcription regulatory region DNA bind... | 0.000        |
|         | GO:0000166 | nucleotide binding                          | 0.001        |
|         | GO:0016830 | carbon-carbon lyase activity                | 0.001        |
|         | GO:0036094 | small molecule binding                      | 0.001        |
|         | GO:1901265 | nucleoside phosphate binding                | 0.001        |
|         | GO:0004190 | aspartic-type endopeptidase activity        | 0.001        |
|         | GO:0070001 | aspartic-type peptidase activity            | 0.001        |
|         | GO:0015171 | amino acid transmembrane transporter act... | 0.002        |
|         | GO:0004871 | signal transducer activity                  | 0.005        |
|         | GO:0001047 | core promoter binding                       | 0.006        |
|         | GO:0016491 | oxidoreductase activity                     | 0.007        |
|         | GO:0001046 | core promoter sequence-specific DNA bind... | 0.009        |
|         | GO:0003959 | NADPH dehydrogenase activity                | 0.011        |
|         | GO:0016682 | oxidoreductase activity, acting on diphe... | 0.011        |

Continued on next page

| GO type | GO ID      | Description                                 | Adj. p-value |
|---------|------------|---------------------------------------------|--------------|
|         | GO:0003714 | transcription corepressor activity          | 0.017        |
|         | GO:0046943 | carboxylic acid transmembrane transporte... | 0.020        |
|         | GO:0016829 | lyase activity                              | 0.028        |
|         | GO:0005342 | organic acid transmembrane transporter a... | 0.034        |
|         | GO:0004864 | protein phosphatase inhibitor activity      | 0.037        |
|         | GO:0019212 | phosphatase inhibitor activity              | 0.037        |
|         | GO:0042562 | hormone binding                             | 0.042        |
|         | GO:0001228 | transcriptional activator activity, RNA ... | 0.046        |
|         | GO:0016841 | ammonia-lyase activity                      | 0.048        |
|         | GO:0046872 | metal ion binding                           | 0.049        |
|         | GO:0016765 | transferase activity, transferring alkyl... | 0.055        |
|         | GO:0000976 | transcription regulatory region sequence... | 0.056        |
|         | GO:0008509 | anion transmembrane transporter activity    | 0.059        |
|         | GO:0043169 | cation binding                              | 0.065        |
|         | GO:0004702 | signal transducer, downstream of recepto... | 0.072        |
|         | GO:0005057 | signal transducer activity, downstream o... | 0.072        |
|         | GO:0004805 | trehalose-phosphatase activity              | 0.072        |
|         | GO:0019208 | phosphatase regulator activity              | 0.072        |
|         | GO:0019888 | protein phosphatase regulator activity      | 0.072        |
|         | GO:0016679 | oxidoreductase activity, acting on diphe... | 0.072        |
|         | GO:0008514 | organic anion transmembrane transporter ... | 0.078        |
|         | GO:0016840 | carbon-nitrogen lyase activity              | 0.078        |
|         | GO:0019203 | carbohydrate phosphatase activity           | 0.078        |
|         | GO:0016757 | transferase activity, transferring glyco... | 0.085        |
|         | GO:0016298 | lipase activity                             | 0.086        |

#### 4.3.5 Root - Preflowering - Cluster 5

| GO type | GO ID      | Description                                 | Adj. p-value |
|---------|------------|---------------------------------------------|--------------|
|         | GO:0060255 | regulation of macromolecule metabolic pr... | 0.000        |
|         | GO:0031323 | regulation of cellular metabolic process    | 0.000        |
|         | GO:0051171 | regulation of nitrogen compound metaboli... | 0.000        |
|         | GO:0010468 | regulation of gene expression               | 0.000        |
|         | GO:0080090 | regulation of primary metabolic process     | 0.000        |
|         | GO:0019219 | regulation of nucleobase-containing comp... | 0.000        |
|         | GO:0031326 | regulation of cellular biosynthetic proc... | 0.000        |
|         | GO:0009889 | regulation of biosynthetic process          | 0.000        |
|         | GO:0010556 | regulation of macromolecule biosynthetic... | 0.000        |
|         | GO:0051252 | regulation of RNA metabolic process         | 0.000        |
|         | GO:0044267 | cellular protein metabolic process          | 0.000        |
|         | GO:0032446 | protein modification by small protein co... | 0.000        |
|         | GO:0008033 | tRNA processing                             | 0.000        |
|         | GO:0043161 | proteasome-mediated ubiquitin-dependent ... | 0.000        |
|         | GO:0090305 | nucleic acid phosphodiester bond hydroly... | 0.000        |
|         | GO:0010498 | proteasomal protein catabolic process       | 0.000        |
|         | GO:0006952 | defense response                            | 0.002        |
|         | GO:0042752 | regulation of circadian rhythm              | 0.003        |
|         | GO:0006796 | phosphate-containing compound metabolic ... | 0.004        |
|         | GO:0065007 | biological regulation                       | 0.004        |
|         | GO:0002097 | tRNA wobble base modification               | 0.004        |
|         | GO:0010501 | RNA secondary structure unwinding           | 0.004        |
|         | GO:0044265 | cellular macromolecule catabolic process    | 0.005        |
|         | GO:0016226 | iron-sulfur cluster assembly                | 0.005        |
|         | GO:0031163 | metallo-sulfur cluster assembly             | 0.005        |
|         | GO:0090501 | RNA phosphodiester bond hydrolysis          | 0.005        |
|         | GO:0006063 | uronic acid metabolic process               | 0.005        |
|         | GO:0006511 | ubiquitin-dependent protein catabolic pr... | 0.007        |
|         | GO:0007623 | circadian rhythm                            | 0.007        |
|         | GO:0048511 | rhythmic process                            | 0.007        |
|         | GO:0009813 | flavonoid biosynthetic process              | 0.007        |
|         | GO:0009627 | systemic acquired resistance                | 0.007        |
| BP      | GO:0009909 | regulation of flower development            | 0.008        |
|         | GO:1904659 | glucose transmembrane transport             | 0.010        |
|         | GO:0015749 | monosaccharide transmembrane transport      | 0.011        |
|         | GO:0008645 | hexose transmembrane transport              | 0.014        |
|         | GO:0006793 | phosphorus metabolic process                | 0.015        |
|         | GO:0019941 | modification-dependent protein catabolic... | 0.015        |
|         | GO:2000241 | regulation of reproductive process          | 0.018        |
|         | GO:0043632 | modification-dependent macromolecule cat... | 0.018        |
|         | GO:0046323 | glucose import                              | 0.018        |
|         | GO:0031425 | chloroplast RNA processing                  | 0.018        |
|         | GO:0009751 | response to salicylic acid                  | 0.031        |
|         | GO:0006836 | neurotransmitter transport                  | 0.033        |
|         | GO:0000373 | Group II intron splicing                    | 0.038        |
|         | GO:0044257 | cellular protein catabolic process          | 0.048        |

Continued on next page



| GO type | GO ID      | Description                                 | Adj. p-value |
|---------|------------|---------------------------------------------|--------------|
|         | GO:0006568 | tryptophan metabolic process                | 0.054        |
|         | GO:0006586 | indolalkylamine metabolic process           | 0.054        |
|         | GO:0015995 | chlorophyll biosynthetic process            | 0.054        |
|         | GO:0098542 | defense response to other organism          | 0.058        |
|         | GO:0000162 | tryptophan biosynthetic process             | 0.062        |
|         | GO:0046219 | indolalkylamine biosynthetic process        | 0.062        |
|         | GO:0051603 | proteolysis involved in cellular protein... | 0.063        |
|         | GO:0009607 | response to biotic stimulus                 | 0.067        |
|         | GO:0006281 | DNA repair                                  | 0.071        |
|         | GO:0006289 | nucleotide-excision repair                  | 0.071        |
|         | GO:0043207 | response to external biotic stimulus        | 0.071        |
|         | GO:0051707 | response to other organism                  | 0.071        |
|         | GO:0051606 | detection of stimulus                       | 0.072        |
|         | GO:1902022 | L-lysine transport                          | 0.079        |
|         | GO:1903401 | L-lysine transmembrane transport            | 0.079        |
|         | GO:0009987 | cellular process                            | 0.082        |
|         | GO:0042430 | indole-containing compound metabolic pro... | 0.083        |
|         | GO:0006974 | cellular response to DNA damage stimulus    | 0.087        |
|         | GO:0006379 | mRNA cleavage                               | 0.096        |
|         | GO:0044451 | nucleoplasm part                            | 0.000        |
|         | GO:1990234 | transferase complex                         | 0.000        |
|         | GO:0009507 | chloroplast                                 | 0.000        |
|         | GO:0043227 | membrane-bounded organelle                  | 0.001        |
|         | GO:0061695 | transferase complex, transferring phosph... | 0.004        |
|         | GO:0016604 | nuclear body                                | 0.005        |
|         | GO:0016592 | mediator complex                            | 0.006        |
|         | GO:1902494 | catalytic complex                           | 0.007        |
|         | GO:0042651 | thylakoid membrane                          | 0.007        |
|         | GO:0034357 | photosynthetic membrane                     | 0.010        |
| CC      | GO:0044436 | thylakoid part                              | 0.013        |
|         | GO:0009579 | thylakoid                                   | 0.024        |
|         | GO:0044435 | plastid part                                | 0.024        |
|         | GO:0009534 | chloroplast thylakoid                       | 0.026        |
|         | GO:0031976 | plastid thylakoid                           | 0.026        |
|         | GO:0080008 | Cul4-RING E3 ubiquitin ligase complex       | 0.027        |
|         | GO:0055035 | plastid thylakoid membrane                  | 0.028        |
|         | GO:0009535 | chloroplast thylakoid membrane              | 0.039        |
|         | GO:0044434 | chloroplast part                            | 0.046        |
|         | GO:0009508 | plastid chromosome                          | 0.055        |
|         | GO:0016607 | nuclear speck                               | 0.064        |
|         | GO:0003677 | DNA binding                                 | 0.000        |
|         | GO:0004672 | protein kinase activity                     | 0.000        |
|         | GO:0140098 | catalytic activity, acting on RNA           | 0.000        |
|         | GO:0004518 | nuclease activity                           | 0.004        |
|         | GO:0043167 | ion binding                                 | 0.004        |
|         | GO:0004540 | ribonuclease activity                       | 0.004        |
|         | GO:0008408 | 3'-5' exonuclease activity                  | 0.006        |
|         | GO:0035639 | purine ribonucleoside triphosphate bindi... | 0.008        |
|         | GO:0005524 | ATP binding                                 | 0.009        |

Continued on next page

| GO type | GO ID      | Description                                 | Adj. p-value |
|---------|------------|---------------------------------------------|--------------|
|         | GO:0005506 | iron ion binding                            | 0.009        |
|         | GO:0003725 | double-stranded RNA binding                 | 0.010        |
|         | GO:0003724 | RNA helicase activity                       | 0.011        |
|         | GO:0004532 | exoribonuclease activity                    | 0.014        |
|         | GO:0008026 | ATP-dependent helicase activity             | 0.014        |
|         | GO:0070035 | purine NTP-dependent helicase activity      | 0.014        |
|         | GO:0008173 | RNA methyltransferase activity              | 0.017        |
|         | GO:0080043 | quercetin 3-O-glucosyltransferase activi... | 0.021        |
|         | GO:0080044 | quercetin 7-O-glucosyltransferase activi... | 0.021        |
|         | GO:0016896 | exoribonuclease activity, producing 5'-p... | 0.023        |
|         | GO:0016705 | oxidoreductase activity, acting on paire... | 0.025        |
|         | GO:0008144 | drug binding                                | 0.025        |
|         | GO:0004004 | ATP-dependent RNA helicase activity         | 0.025        |
|         | GO:0008186 | RNA-dependent ATPase activity               | 0.025        |
|         | GO:0005355 | glucose transmembrane transporter activi... | 0.026        |
|         | GO:0004527 | exonuclease activity                        | 0.026        |
|         | GO:0015145 | monosaccharide transmembrane transporter... | 0.027        |
|         | GO:0005326 | neurotransmitter transporter activity       | 0.030        |
|         | GO:0051213 | dioxygenase activity                        | 0.035        |
|         | GO:0015149 | hexose transmembrane transporter activit... | 0.035        |
|         | GO:0004497 | monooxygenase activity                      | 0.043        |
|         | GO:0072509 | divalent inorganic cation transmembrane ... | 0.043        |
|         | GO:0030246 | carbohydrate binding                        | 0.072        |
|         | GO:0015172 | acidic amino acid transmembrane transpor... | 0.077        |
|         | GO:0015181 | arginine transmembrane transporter activ... | 0.077        |
|         | GO:0015189 | L-lysine transmembrane transporter activ... | 0.077        |
|         | GO:0030983 | mismatched DNA binding                      | 0.080        |
|         | GO:0004519 | endonuclease activity                       | 0.089        |
|         | GO:0046915 | transition metal ion transmembrane trans... | 0.097        |
|         | GO:0015291 | secondary active transmembrane transport... | 0.099        |

#### 4.3.6 Root - Preflowering - Cluster 6

| GO type | GO ID      | Description                                 | Adj. p-value |
|---------|------------|---------------------------------------------|--------------|
|         | GO:0051171 | regulation of nitrogen compound metaboli... | 0.000        |
|         | GO:0032446 | protein modification by small protein co... | 0.000        |
|         | GO:0060255 | regulation of macromolecule metabolic pr... | 0.000        |
|         | GO:0080090 | regulation of primary metabolic process     | 0.000        |
|         | GO:0055085 | transmembrane transport                     | 0.000        |
|         | GO:0043161 | proteasome-mediated ubiquitin-dependent ... | 0.000        |
|         | GO:0010498 | proteasomal protein catabolic process       | 0.001        |
|         | GO:0042430 | indole-containing compound metabolic pro... | 0.006        |
|         | GO:0044257 | cellular protein catabolic process          | 0.007        |
|         | GO:0000162 | tryptophan biosynthetic process             | 0.008        |
|         | GO:0006511 | ubiquitin-dependent protein catabolic pr... | 0.008        |
|         | GO:0046219 | indolalkylamine biosynthetic process        | 0.008        |
|         | GO:0051603 | proteolysis involved in cellular protein... | 0.009        |
|         | GO:1901565 | organonitrogen compound catabolic proces... | 0.009        |
|         | GO:0050794 | regulation of cellular process              | 0.010        |
|         | GO:1902022 | L-lysine transport                          | 0.010        |
|         | GO:1903401 | L-lysine transmembrane transport            | 0.010        |
|         | GO:0010921 | regulation of phosphatase activity          | 0.011        |
|         | GO:0043632 | modification-dependent macromolecule cat... | 0.011        |
|         | GO:0044265 | cellular macromolecule catabolic process    | 0.011        |
|         | GO:0019438 | aromatic compound biosynthetic process      | 0.013        |
| BP      | GO:0006857 | oligopeptide transport                      | 0.014        |
|         | GO:1901362 | organic cyclic compound biosynthetic pro... | 0.015        |
|         | GO:0019941 | modification-dependent protein catabolic... | 0.017        |
|         | GO:0080163 | regulation of protein serine/threonine p... | 0.020        |
|         | GO:0035303 | regulation of dephosphorylation             | 0.022        |
|         | GO:0009627 | systemic acquired resistance                | 0.023        |
|         | GO:0043666 | regulation of phosphoprotein phosphatase... | 0.024        |
|         | GO:0030163 | protein catabolic process                   | 0.026        |
|         | GO:0006836 | neurotransmitter transport                  | 0.033        |
|         | GO:0006749 | glutathione metabolic process               | 0.045        |
|         | GO:0008643 | carbohydrate transport                      | 0.046        |
|         | GO:0006508 | proteolysis                                 | 0.049        |
|         | GO:0006820 | anion transport                             | 0.049        |
|         | GO:0035304 | regulation of protein dephosphorylation     | 0.049        |
|         | GO:0043648 | dicarboxylic acid metabolic process         | 0.053        |
|         | GO:0009308 | amine metabolic process                     | 0.066        |
|         | GO:0009072 | aromatic amino acid family metabolic pro... | 0.067        |
|         | GO:0000041 | transition metal ion transport              | 0.071        |
|         | GO:0015802 | basic amino acid transport                  | 0.078        |
|         | GO:0010243 | response to organonitrogen compound         | 0.081        |
|         | GO:0071577 | zinc ion transmembrane transport            | 0.096        |
|         | GO:0042364 | water-soluble vitamin biosynthetic proce... | 0.099        |
|         | GO:0000323 | lytic vacuole                               | 0.004        |
|         | GO:0031226 | intrinsic component of plasma membrane      | 0.010        |
|         | GO:0031461 | cullin-RING ubiquitin ligase complex        | 0.010        |

Continued on next page

| GO type | GO ID      | Description                                 | Adj. p-value |
|---------|------------|---------------------------------------------|--------------|
|         | GO:0005764 | lysosome                                    | 0.015        |
|         | GO:0071013 | catalytic step 2 spliceosome                | 0.019        |
|         | GO:0016591 | DNA-directed RNA polymerase II, holoenzy... | 0.021        |
|         | GO:0044459 | plasma membrane part                        | 0.021        |
|         | GO:0090575 | RNA polymerase II transcription factor c... | 0.026        |
|         | GO:0000151 | ubiquitin ligase complex                    | 0.031        |
|         | GO:0005886 | plasma membrane                             | 0.050        |
|         | GO:0071944 | cell periphery                              | 0.070        |
|         | GO:0044798 | nuclear transcription factor complex        | 0.072        |
|         | GO:0019787 | ubiquitin-like protein transferase activ... | 0.000        |
|         | GO:0004497 | monooxygenase activity                      | 0.000        |
|         | GO:0016705 | oxidoreductase activity, acting on paire... | 0.000        |
|         | GO:0015291 | secondary active transmembrane transport... | 0.000        |
|         | GO:0022857 | transmembrane transporter activity          | 0.001        |
|         | GO:0044212 | transcription regulatory region DNA bind... | 0.001        |
|         | GO:0017076 | purine nucleotide binding                   | 0.002        |
|         | GO:0005351 | carbohydrate:proton symporter activity      | 0.002        |
|         | GO:0005402 | carbohydrate:cation symporter activity      | 0.002        |
|         | GO:0015295 | solute:proton symporter activity            | 0.002        |
|         | GO:0032553 | ribonucleotide binding                      | 0.002        |
|         | GO:0015294 | solute:cation symporter activity            | 0.002        |
|         | GO:0001047 | core promoter binding                       | 0.003        |
|         | GO:0003677 | DNA binding                                 | 0.003        |
|         | GO:0035639 | purine ribonucleoside triphosphate bindi... | 0.003        |
|         | GO:0046906 | tetrapyrrole binding                        | 0.003        |
|         | GO:0001046 | core promoter sequence-specific DNA bind... | 0.005        |
|         | GO:0001871 | pattern binding                             | 0.005        |
|         | GO:0030247 | polysaccharide binding                      | 0.005        |
|         | GO:1901363 | heterocyclic compound binding               | 0.005        |
|         | GO:0035251 | UDP-glucosyltransferase activity            | 0.005        |
|         | GO:0097159 | organic cyclic compound binding             | 0.005        |
|         | GO:0015181 | arginine transmembrane transporter activ... | 0.006        |
|         | GO:0015189 | L-lysine transmembrane transporter activ... | 0.006        |
|         | GO:0015172 | acidic amino acid transmembrane transpor... | 0.006        |
|         | GO:0043531 | ADP binding                                 | 0.006        |
|         | GO:0016830 | carbon-carbon lyase activity                | 0.009        |
|         | GO:0015318 | inorganic molecular entity transmembrane... | 0.010        |
|         | GO:0003824 | catalytic activity                          | 0.011        |
|         | GO:0015075 | ion transmembrane transporter activity      | 0.011        |
|         | GO:0004864 | protein phosphatase inhibitor activity      | 0.013        |
|         | GO:0019212 | phosphatase inhibitor activity              | 0.013        |
|         | GO:0008324 | cation transmembrane transporter activit... | 0.015        |
|         | GO:0008061 | chitin binding                              | 0.016        |
| MF      | GO:0005326 | neurotransmitter transporter activity       | 0.019        |
|         | GO:0015174 | basic amino acid transmembrane transport... | 0.019        |
|         | GO:0061630 | ubiquitin protein ligase activity           | 0.021        |
|         | GO:0004364 | glutathione transferase activity            | 0.022        |
|         | GO:0061659 | ubiquitin-like protein ligase activity      | 0.022        |
|         | GO:0036094 | small molecule binding                      | 0.023        |

Continued on next page

| GO type | GO ID      | Description                                 | Adj. p-value |
|---------|------------|---------------------------------------------|--------------|
|         | GO:0001228 | transcriptional activator activity, RNA ... | 0.023        |
|         | GO:0019208 | phosphatase regulator activity              | 0.026        |
|         | GO:0019888 | protein phosphatase regulator activity      | 0.026        |
|         | GO:0004857 | enzyme inhibitor activity                   | 0.032        |
|         | GO:0030414 | peptidase inhibitor activity                | 0.033        |
|         | GO:0061134 | peptidase regulator activity                | 0.033        |
|         | GO:0005385 | zinc ion transmembrane transporter activ... | 0.035        |
|         | GO:0008194 | UDP-glycosyltransferase activity            | 0.036        |
|         | GO:0004866 | endopeptidase inhibitor activity            | 0.039        |
|         | GO:0016765 | transferase activity, transferring alkyl... | 0.039        |
|         | GO:0061135 | endopeptidase regulator activity            | 0.039        |
|         | GO:0015144 | carbohydrate transmembrane transporter a... | 0.041        |
|         | GO:0042562 | hormone binding                             | 0.047        |
|         | GO:0046527 | glucosyltransferase activity                | 0.047        |
|         | GO:0022890 | inorganic cation transmembrane transport... | 0.050        |
|         | GO:0000166 | nucleotide binding                          | 0.054        |
|         | GO:1901265 | nucleoside phosphate binding                | 0.054        |
|         | GO:0008483 | transaminase activity                       | 0.059        |
|         | GO:0016769 | transferase activity, transferring nitro... | 0.059        |
|         | GO:0046915 | transition metal ion transmembrane trans... | 0.064        |
|         | GO:0004970 | ionotropic glutamate receptor activity      | 0.066        |
|         | GO:0005230 | extracellular ligand-gated ion channel a... | 0.066        |
|         | GO:0008066 | glutamate receptor activity                 | 0.066        |
|         | GO:0022824 | transmitter-gated ion channel activity      | 0.066        |
|         | GO:0022835 | transmitter-gated channel activity          | 0.066        |
|         | GO:0072509 | divalent inorganic cation transmembrane ... | 0.066        |
|         | GO:0010427 | abscisic acid binding                       | 0.071        |
|         | GO:0000976 | transcription regulatory region sequence... | 0.074        |
|         | GO:0019840 | isoprenoid binding                          | 0.075        |
|         | GO:0004568 | chitinase activity                          | 0.081        |

#### 4.3.7 Root - Preflowering - Cluster 7

| GO type | GO ID      | Description                                 | Adj. p-value |
|---------|------------|---------------------------------------------|--------------|
|         | GO:0007017 | microtubule-based process                   | 0.000        |
|         | GO:0010383 | cell wall polysaccharide metabolic proce... | 0.000        |
|         | GO:0044036 | cell wall macromolecule metabolic proces... | 0.000        |
|         | GO:0046034 | ATP metabolic process                       | 0.000        |
|         | GO:0009832 | plant-type cell wall biogenesis             | 0.000        |
|         | GO:0032989 | cellular component morphogenesis            | 0.000        |
|         | GO:0000902 | cell morphogenesis                          | 0.000        |
|         | GO:1903047 | mitotic cell cycle process                  | 0.000        |
|         | GO:0009145 | purine nucleoside triphosphate biosynthe... | 0.000        |
|         | GO:0009206 | purine ribonucleoside triphosphate biosy... | 0.000        |
|         | GO:0009142 | nucleoside triphosphate biosynthetic pro... | 0.000        |
|         | GO:0046434 | organophosphate catabolic process           | 0.000        |
|         | GO:0016049 | cell growth                                 | 0.000        |
|         | GO:1902600 | proton transmembrane transport              | 0.000        |
|         | GO:0000910 | cytokinesis                                 | 0.000        |
|         | GO:0009156 | ribonucleoside monophosphate biosyntheti... | 0.000        |
|         | GO:0098754 | detoxification                              | 0.000        |
|         | GO:0009124 | nucleoside monophosphate biosynthetic pr... | 0.000        |
|         | GO:0044038 | cell wall macromolecule biosynthetic pro... | 0.000        |
|         | GO:0070589 | cellular component macromolecule biosynt... | 0.000        |
|         | GO:0046496 | nicotinamide nucleotide metabolic proces... | 0.000        |
|         | GO:0046939 | nucleotide phosphorylation                  | 0.000        |
|         | GO:0016192 | vesicle-mediated transport                  | 0.000        |
|         | GO:0070592 | cell wall polysaccharide biosynthetic pr... | 0.000        |
|         | GO:0046394 | carboxylic acid biosynthetic process        | 0.000        |
|         | GO:0019318 | hexose metabolic process                    | 0.000        |
|         | GO:0034637 | cellular carbohydrate biosynthetic proce... | 0.000        |
|         | GO:0048193 | Golgi vesicle transport                     | 0.000        |
|         | GO:0009699 | phenylpropanoid biosynthetic process        | 0.000        |
|         | GO:0000226 | microtubule cytoskeleton organization       | 0.000        |
|         | GO:0006629 | lipid metabolic process                     | 0.000        |
|         | GO:0000904 | cell morphogenesis involved in different... | 0.000        |
|         | GO:0097435 | supramolecular fiber organization           | 0.000        |
|         | GO:0051273 | beta-glucan metabolic process               | 0.000        |
|         | GO:0006631 | fatty acid metabolic process                | 0.000        |
|         | GO:0006260 | DNA replication                             | 0.000        |
|         | GO:0006101 | citrate metabolic process                   | 0.001        |
|         | GO:0048868 | pollen tube development                     | 0.001        |
|         | GO:0006261 | DNA-dependent DNA replication               | 0.001        |
|         | GO:0032502 | developmental process                       | 0.001        |
|         | GO:0006119 | oxidative phosphorylation                   | 0.001        |
|         | GO:0042773 | ATP synthesis coupled electron transport    | 0.001        |
|         | GO:0006633 | fatty acid biosynthetic process             | 0.001        |
|         | GO:0044703 | multi-organism reproductive process         | 0.001        |
|         | GO:0006099 | tricarboxylic acid cycle                    | 0.001        |
|         | GO:0010052 | guard cell differentiation                  | 0.001        |

Continued on next page

| GO type | GO ID      | Description                                 | Adj. p-value |
|---------|------------|---------------------------------------------|--------------|
|         | GO:0090626 | plant epidermis morphogenesis               | 0.001        |
|         | GO:0008154 | actin polymerization or depolymerization    | 0.002        |
|         | GO:0019953 | sexual reproduction                         | 0.002        |
|         | GO:0030244 | cellulose biosynthetic process              | 0.002        |
|         | GO:0032535 | regulation of cellular component size       | 0.002        |
|         | GO:0090066 | regulation of anatomical structure size     | 0.002        |
|         | GO:0015791 | polyol transport                            | 0.002        |
|         | GO:0044247 | cellular polysaccharide catabolic proces... | 0.002        |
|         | GO:0045493 | xylan catabolic process                     | 0.002        |
|         | GO:0006650 | glycerophospholipid metabolic process       | 0.002        |
|         | GO:0010564 | regulation of cell cycle process            | 0.002        |
|         | GO:0090627 | plant epidermal cell differentiation        | 0.002        |
|         | GO:0098662 | inorganic cation transmembrane transport    | 0.002        |
|         | GO:0008064 | regulation of actin polymerization or de... | 0.002        |
|         | GO:0030832 | regulation of actin filament length         | 0.002        |
|         | GO:0032956 | regulation of actin cytoskeleton organiz... | 0.002        |
|         | GO:0032970 | regulation of actin filament-based proce... | 0.002        |
|         | GO:0110053 | regulation of actin filament organizatio... | 0.002        |
|         | GO:0048588 | developmental cell growth                   | 0.003        |
|         | GO:0052546 | cell wall pectin metabolic process          | 0.003        |
|         | GO:0009225 | nucleotide-sugar metabolic process          | 0.003        |
|         | GO:0044255 | cellular lipid metabolic process            | 0.003        |
|         | GO:0010374 | stomatal complex development                | 0.003        |
|         | GO:0051274 | beta-glucan biosynthetic process            | 0.003        |
|         | GO:0015985 | energy coupled proton transport, down el... | 0.003        |
|         | GO:0015986 | ATP synthesis coupled proton transport      | 0.003        |
|         | GO:0042775 | mitochondrial ATP synthesis coupled elec... | 0.003        |
|         | GO:0051258 | protein polymerization                      | 0.003        |
|         | GO:0015980 | energy derivation by oxidation of organi... | 0.004        |
|         | GO:0008361 | regulation of cell size                     | 0.004        |
|         | GO:0051129 | negative regulation of cellular componen... | 0.004        |
|         | GO:0072350 | tricarboxylic acid metabolic process        | 0.004        |
|         | GO:0009056 | catabolic process                           | 0.004        |
|         | GO:0009809 | lignin biosynthetic process                 | 0.004        |
|         | GO:0030041 | actin filament polymerization               | 0.004        |
|         | GO:0030833 | regulation of actin filament polymerizat... | 0.004        |
|         | GO:0051179 | localization                                | 0.004        |
|         | GO:0006012 | galactose metabolic process                 | 0.005        |
|         | GO:0006644 | phospholipid metabolic process              | 0.005        |
|         | GO:0048469 | cell maturation                             | 0.005        |
|         | GO:0048764 | trichoblast maturation                      | 0.005        |
|         | GO:0048765 | root hair cell differentiation              | 0.005        |
|         | GO:0022904 | respiratory electron transport chain        | 0.005        |
|         | GO:0010026 | trichome differentiation                    | 0.005        |
|         | GO:0051493 | regulation of cytoskeleton organization     | 0.005        |
|         | GO:0080147 | root hair cell development                  | 0.006        |
|         | GO:0048278 | vesicle docking                             | 0.006        |
|         | GO:0046486 | glycerolipid metabolic process              | 0.006        |
|         | GO:0010054 | trichoblast differentiation                 | 0.006        |

Continued on next page

| GO type | GO ID      | Description                                 | Adj. p-value |
|---------|------------|---------------------------------------------|--------------|
|         | GO:0019321 | pentose metabolic process                   | 0.007        |
|         | GO:0044275 | cellular carbohydrate catabolic process     | 0.008        |
|         | GO:0006810 | transport                                   | 0.008        |
|         | GO:0044770 | cell cycle phase transition                 | 0.008        |
|         | GO:0034220 | ion transmembrane transport                 | 0.008        |
|         | GO:0007015 | actin filament organization                 | 0.008        |
|         | GO:0032787 | monocarboxylic acid metabolic process       | 0.008        |
|         | GO:0051234 | establishment of localization               | 0.009        |
|         | GO:1902903 | regulation of supramolecular fiber organ... | 0.009        |
|         | GO:0009100 | glycoprotein metabolic process              | 0.009        |
|         | GO:0030029 | actin filament-based process                | 0.009        |
|         | GO:0018105 | peptidyl-serine phosphorylation             | 0.011        |
|         | GO:0030036 | actin cytoskeleton organization             | 0.011        |
|         | GO:0051188 | cofactor biosynthetic process               | 0.011        |
|         | GO:0022622 | root system development                     | 0.012        |
|         | GO:0009934 | regulation of meristem structural organi... | 0.013        |
|         | GO:0022406 | membrane docking                            | 0.013        |
|         | GO:0140056 | organelle localization by membrane tethe... | 0.013        |
|         | GO:0009226 | nucleotide-sugar biosynthetic process       | 0.013        |
|         | GO:0019722 | calcium-mediated signaling                  | 0.013        |
|         | GO:0008610 | lipid biosynthetic process                  | 0.014        |
|         | GO:0006486 | protein glycosylation                       | 0.014        |
|         | GO:0043413 | macromolecule glycosylation                 | 0.014        |
|         | GO:0015850 | organic hydroxy compound transport          | 0.015        |
|         | GO:0044772 | mitotic cell cycle phase transition         | 0.015        |
|         | GO:0048364 | root development                            | 0.015        |
|         | GO:0051235 | maintenance of location                     | 0.015        |
|         | GO:0006812 | cation transport                            | 0.016        |
|         | GO:0045490 | pectin catabolic process                    | 0.016        |
|         | GO:0018209 | peptidyl-serine modification                | 0.016        |
|         | GO:0010053 | root epidermal cell differentiation         | 0.016        |
|         | GO:0010639 | negative regulation of organelle organiz... | 0.017        |
|         | GO:1903338 | regulation of cell wall organization or ... | 0.017        |
|         | GO:0070085 | glycosylation                               | 0.018        |
|         | GO:0007275 | multicellular organism development          | 0.018        |
|         | GO:0022604 | regulation of cell morphogenesis            | 0.020        |
|         | GO:0006006 | glucose metabolic process                   | 0.021        |
|         | GO:0031122 | cytoplasmic microtubule organization        | 0.021        |
|         | GO:0043547 | positive regulation of GTPase activity      | 0.022        |
|         | GO:0019752 | carboxylic acid metabolic process           | 0.022        |
|         | GO:0048229 | gametophyte development                     | 0.022        |
|         | GO:0046470 | phosphatidylcholine metabolic process       | 0.022        |
|         | GO:0009808 | lignin metabolic process                    | 0.024        |
|         | GO:0022603 | regulation of anatomical structure morph... | 0.024        |
|         | GO:0006979 | response to oxidative stress                | 0.024        |
|         | GO:0009932 | cell tip growth                             | 0.025        |
|         | GO:0051345 | positive regulation of hydrolase activit... | 0.025        |
|         | GO:0009860 | pollen tube growth                          | 0.025        |
|         | GO:0030198 | extracellular matrix organization           | 0.025        |

Continued on next page



| GO type | GO ID      | Description                                 | Adj. p-value |
|---------|------------|---------------------------------------------|--------------|
|         | GO:0043062 | extracellular structure organization        | 0.025        |
|         | GO:0046835 | carbohydrate phosphorylation                | 0.026        |
|         | GO:0032501 | multicellular organismal process            | 0.027        |
|         | GO:0030004 | cellular monovalent inorganic cation hom... | 0.028        |
|         | GO:0006888 | ER to Golgi vesicle-mediated transport      | 0.029        |
|         | GO:0097164 | ammonium ion metabolic process              | 0.032        |
|         | GO:0000280 | nuclear division                            | 0.032        |
|         | GO:0007051 | spindle organization                        | 0.035        |
|         | GO:2000652 | regulation of secondary cell wall biogen... | 0.035        |
|         | GO:0032271 | regulation of protein polymerization        | 0.035        |
|         | GO:0055082 | cellular chemical homeostasis               | 0.035        |
|         | GO:0043087 | regulation of GTPase activity               | 0.037        |
|         | GO:0010345 | suberin biosynthetic process                | 0.037        |
|         | GO:0048826 | cotyledon morphogenesis                     | 0.038        |
|         | GO:0051640 | organelle localization                      | 0.038        |
|         | GO:0051726 | regulation of cell cycle                    | 0.038        |
|         | GO:0030258 | lipid modification                          | 0.040        |
|         | GO:0043647 | inositol phosphate metabolic process        | 0.041        |
|         | GO:0046854 | phosphatidylinositol phosphorylation        | 0.041        |
|         | GO:0030148 | sphingolipid biosynthetic process           | 0.041        |
|         | GO:0000086 | G2/M transition of mitotic cell cycle       | 0.041        |
|         | GO:0042545 | cell wall modification                      | 0.041        |
|         | GO:0051275 | beta-glucan catabolic process               | 0.041        |
|         | GO:1901617 | organic hydroxy compound biosynthetic pr... | 0.041        |
|         | GO:1901990 | regulation of mitotic cell cycle phase t... | 0.043        |
|         | GO:0030245 | cellulose catabolic process                 | 0.044        |
|         | GO:0019915 | lipid storage                               | 0.044        |
|         | GO:0030641 | regulation of cellular pH                   | 0.048        |
|         | GO:0051453 | regulation of intracellular pH              | 0.048        |
|         | GO:0098655 | cation transmembrane transport              | 0.048        |
|         | GO:0031109 | microtubule polymerization or depolymeri... | 0.051        |
|         | GO:0035556 | intracellular signal transduction           | 0.051        |
|         | GO:0006536 | glutamate metabolic process                 | 0.051        |
|         | GO:0009101 | glycoprotein biosynthetic process           | 0.052        |
|         | GO:0007030 | Golgi organization                          | 0.052        |
|         | GO:0019932 | second-messenger-mediated signaling         | 0.052        |
|         | GO:0009629 | response to gravity                         | 0.053        |
|         | GO:0043254 | regulation of protein complex assembly      | 0.053        |
|         | GO:1901987 | regulation of cell cycle phase transitio... | 0.054        |
|         | GO:0006970 | response to osmotic stress                  | 0.055        |
|         | GO:0048825 | cotyledon development                       | 0.057        |
|         | GO:0009250 | glucan biosynthetic process                 | 0.058        |
|         | GO:1903046 | meiotic cell cycle process                  | 0.058        |
|         | GO:0044839 | cell cycle G2/M phase transition            | 0.059        |
|         | GO:0044248 | cellular catabolic process                  | 0.059        |
|         | GO:0016050 | vesicle organization                        | 0.059        |
|         | GO:0000819 | sister chromatid segregation                | 0.060        |
|         | GO:0009395 | phospholipid catabolic process              | 0.060        |
|         | GO:0051651 | maintenance of location in cell             | 0.060        |

Continued on next page

| GO type | GO ID      | Description                                 | Adj. p-value |
|---------|------------|---------------------------------------------|--------------|
|         | GO:0016482 | cytosolic transport                         | 0.061        |
|         | GO:0048878 | chemical homeostasis                        | 0.063        |
|         | GO:0065008 | regulation of biological quality            | 0.063        |
|         | GO:0042147 | retrograde transport, endosome to Golgi     | 0.063        |
|         | GO:0048316 | seed development                            | 0.066        |
|         | GO:0021700 | developmental maturation                    | 0.066        |
|         | GO:0008643 | carbohydrate transport                      | 0.067        |
|         | GO:0051321 | meiotic cell cycle                          | 0.070        |
|         | GO:0009555 | pollen development                          | 0.070        |
|         | GO:0071103 | DNA conformation change                     | 0.073        |
|         | GO:0051716 | cellular response to stimulus               | 0.074        |
|         | GO:0010215 | cellulose microfibril organization          | 0.074        |
|         | GO:0000003 | reproduction                                | 0.076        |
|         | GO:0008356 | asymmetric cell division                    | 0.076        |
|         | GO:0010090 | trichome morphogenesis                      | 0.076        |
|         | GO:0043244 | regulation of protein complex disassembl... | 0.076        |
|         | GO:0048285 | organelle fission                           | 0.081        |
|         | GO:0016042 | lipid catabolic process                     | 0.081        |
|         | GO:0022900 | electron transport chain                    | 0.082        |
|         | GO:0046834 | lipid phosphorylation                       | 0.087        |
|         | GO:0006811 | ion transport                               | 0.091        |
|         | GO:0007346 | regulation of mitotic cell cycle            | 0.092        |
|         | GO:0098813 | nuclear chromosome segregation              | 0.093        |
|         | GO:0033043 | regulation of organelle organization        | 0.095        |
|         | GO:0022414 | reproductive process                        | 0.096        |
|         | GO:0051510 | regulation of unidimensional cell growth    | 0.096        |
|         | GO:0098657 | import into cell                            | 0.096        |
|         | GO:0003006 | developmental process involved in reprod... | 0.097        |
|         | GO:0044430 | cytoskeletal part                           | 0.000        |
|         | GO:0016020 | membrane                                    | 0.000        |
|         | GO:0070469 | respiratory chain                           | 0.000        |
|         | GO:0005740 | mitochondrial envelope                      | 0.000        |
|         | GO:0031225 | anchored component of membrane              | 0.000        |
|         | GO:0044429 | mitochondrial part                          | 0.000        |
|         | GO:0044437 | vacuolar part                               | 0.000        |
|         | GO:0044425 | membrane part                               | 0.000        |
|         | GO:0033178 | proton-transporting two-sector ATPase co... | 0.000        |
|         | GO:0005819 | spindle                                     | 0.000        |
|         | GO:0005768 | endosome                                    | 0.000        |
|         | GO:0030660 | Golgi-associated vesicle membrane           | 0.001        |
|         | GO:0005881 | cytoplasmic microtubule                     | 0.001        |
|         | GO:0030863 | cortical cytoskeleton                       | 0.001        |
|         | GO:0030981 | cortical microtubule cytoskeleton           | 0.001        |
|         | GO:0055028 | cortical microtubule                        | 0.001        |
|         | GO:0033177 | proton-transporting two-sector ATPase co... | 0.001        |
|         | GO:0033180 | proton-transporting V-type ATPase, V1 do... | 0.001        |
|         | GO:0009504 | cell plate                                  | 0.001        |
|         | GO:0044815 | DNA packaging complex                       | 0.002        |
|         | GO:0032993 | protein-DNA complex                         | 0.002        |

Continued on next page

| GO type | GO ID      | Description                                 | Adj. p-value |
|---------|------------|---------------------------------------------|--------------|
|         | GO:0044433 | cytoplasmic vesicle part                    | 0.002        |
|         | GO:0045259 | proton-transporting ATP synthase complex    | 0.002        |
|         | GO:0031224 | intrinsic component of membrane             | 0.003        |
|         | GO:0000786 | nucleosome                                  | 0.005        |
|         | GO:0070069 | cytochrome complex                          | 0.005        |
|         | GO:0005838 | proteasome regulatory particle              | 0.005        |
|         | GO:0022624 | proteasome accessory complex                | 0.005        |
|         | GO:0000775 | chromosome, centromeric region              | 0.006        |
|         | GO:0005769 | early endosome                              | 0.007        |
|         | GO:0030118 | clathrin coat                               | 0.008        |
|         | GO:0009574 | preprophase band                            | 0.014        |
|         | GO:0005798 | Golgi-associated vesicle                    | 0.015        |
|         | GO:0030133 | transport vesicle                           | 0.017        |
|         | GO:0030658 | transport vesicle membrane                  | 0.017        |
|         | GO:0000325 | plant-type vacuole                          | 0.022        |
|         | GO:0030136 | clathrin-coated vesicle                     | 0.024        |
|         | GO:0044427 | chromosomal part                            | 0.027        |
|         | GO:0000793 | condensed chromosome                        | 0.029        |
|         | GO:0009705 | plant-type vacuole membrane                 | 0.033        |
|         | GO:0042575 | DNA polymerase complex                      | 0.033        |
|         | GO:0043596 | nuclear replication fork                    | 0.056        |
|         | GO:0000794 | condensed nuclear chromosome                | 0.062        |
|         | GO:0016021 | integral component of membrane              | 0.079        |
|         | GO:0017119 | Golgi transport complex                     | 0.079        |
|         | GO:0000347 | THO complex                                 | 0.081        |
|         | GO:0005657 | replication fork                            | 0.082        |
|         | GO:0005938 | cell cortex                                 | 0.085        |
|         | GO:0000228 | nuclear chromosome                          | 0.087        |
|         | GO:0019867 | outer membrane                              | 0.095        |
|         | GO:0031201 | SNARE complex                               | 0.096        |
|         | GO:0044454 | nuclear chromosome part                     | 0.096        |
|         | GO:0003824 | catalytic activity                          | 0.000        |
|         | GO:0016787 | hydrolase activity                          | 0.000        |
|         | GO:0016491 | oxidoreductase activity                     | 0.000        |
|         | GO:0015077 | monovalent inorganic cation transmembran... | 0.001        |
|         | GO:0005085 | guanyl-nucleotide exchange factor activi... | 0.001        |
|         | GO:0009044 | xylan 1,4-beta-xylosidase activity          | 0.001        |
|         | GO:0097599 | xylanase activity                           | 0.001        |
|         | GO:0042349 | guiding stereospecific synthesis activit... | 0.002        |
|         | GO:0016462 | pyrophosphatase activity                    | 0.002        |
|         | GO:0015166 | polyol transmembrane transporter activit... | 0.002        |
|         | GO:0016853 | isomerase activity                          | 0.002        |
|         | GO:0016817 | hydrolase activity, acting on acid anhyd... | 0.002        |
|         | GO:0015078 | proton transmembrane transporter activit... | 0.003        |
|         | GO:1901618 | organic hydroxy compound transmembrane t... | 0.003        |
|         | GO:0046933 | proton-transporting ATP synthase activit... | 0.003        |
|         | GO:0016747 | transferase activity, transferring acyl ... | 0.003        |
|         | GO:0016620 | oxidoreductase activity, acting on the a... | 0.004        |
|         | GO:0042578 | phosphoric ester hydrolase activity         | 0.004        |

Continued on next page

| GO type | GO ID      | Description                                 | Adj. p-value |
|---------|------------|---------------------------------------------|--------------|
|         | GO:0015318 | inorganic molecular entity transmembrane... | 0.005        |
|         | GO:0022890 | inorganic cation transmembrane transport... | 0.005        |
|         | GO:0051020 | GTPase binding                              | 0.006        |
|         | GO:0140097 | catalytic activity, acting on DNA           | 0.006        |
|         | GO:0004567 | beta-mannosidase activity                   | 0.006        |
|         | GO:0016759 | cellulose synthase activity                 | 0.006        |
|         | GO:0016760 | cellulose synthase (UDP-forming) activit... | 0.006        |
|         | GO:0016788 | hydrolase activity, acting on ester bond... | 0.008        |
|         | GO:0016776 | phosphotransferase activity, phosphate g... | 0.010        |
|         | GO:0016887 | ATPase activity                             | 0.010        |
|         | GO:0015926 | glucosidase activity                        | 0.011        |
|         | GO:0016857 | racemase and epimerase activity, acting ... | 0.012        |
|         | GO:0045330 | aspartyl esterase activity                  | 0.013        |
|         | GO:0098772 | molecular function regulator                | 0.015        |
|         | GO:1901681 | sulfur compound binding                     | 0.015        |
|         | GO:0015923 | mannosidase activity                        | 0.016        |
|         | GO:0030276 | clathrin binding                            | 0.018        |
|         | GO:0003678 | DNA helicase activity                       | 0.019        |
|         | GO:0004743 | pyruvate kinase activity                    | 0.019        |
|         | GO:0005200 | structural constituent of cytoskeleton      | 0.019        |
|         | GO:0008047 | enzyme activator activity                   | 0.019        |
|         | GO:0008081 | phosphoric diester hydrolase activity       | 0.019        |
|         | GO:0008324 | cation transmembrane transporter activit... | 0.019        |
|         | GO:0015267 | channel activity                            | 0.019        |
|         | GO:0016722 | oxidoreductase activity, oxidizing metal... | 0.019        |
|         | GO:0022803 | passive transmembrane transporter activi... | 0.019        |
|         | GO:0022838 | substrate-specific channel activity         | 0.019        |
|         | GO:0030955 | potassium ion binding                       | 0.019        |
|         | GO:0031420 | alkali metal ion binding                    | 0.019        |
|         | GO:0042285 | xylosyltransferase activity                 | 0.019        |
|         | GO:0046906 | tetrapyrrole binding                        | 0.019        |
|         | GO:0070569 | uridylyltransferase activity                | 0.019        |
|         | GO:0008289 | lipid binding                               | 0.022        |
|         | GO:0016868 | intramolecular transferase activity, pho... | 0.022        |
|         | GO:0017016 | Ras GTPase binding                          | 0.023        |
|         | GO:0031267 | small GTPase binding                        | 0.023        |
|         | GO:0008378 | galactosyltransferase activity              | 0.024        |
|         | GO:0019201 | nucleotide kinase activity                  | 0.024        |
|         | GO:0016758 | transferase activity, transferring hexos... | 0.025        |
|         | GO:0016417 | S-acyltransferase activity                  | 0.029        |
|         | GO:0015144 | carbohydrate transmembrane transporter a... | 0.030        |
|         | GO:0030599 | pectinesterase activity                     | 0.032        |
|         | GO:0020037 | heme binding                                | 0.032        |
|         | GO:0005215 | transporter activity                        | 0.035        |
|         | GO:0035639 | purine ribonucleoside triphosphate bindi... | 0.035        |
|         | GO:0016854 | racemase and epimerase activity             | 0.040        |
|         | GO:0019205 | nucleobase-containing compound kinase ac... | 0.041        |
|         | GO:0016679 | oxidoreductase activity, acting on diphe... | 0.044        |
|         | GO:0015154 | disaccharide transmembrane transporter a... | 0.049        |

Continued on next page

| GO type | GO ID      | Description                                 | Adj. p-value |
|---------|------------|---------------------------------------------|--------------|
|         | GO:0015157 | oligosaccharide transmembrane transporte... | 0.049        |
|         | GO:0019200 | carbohydrate kinase activity                | 0.049        |
|         | GO:0097367 | carbohydrate derivative binding             | 0.049        |
|         | GO:0016791 | phosphatase activity                        | 0.049        |
|         | GO:0043138 | 3'-5' DNA helicase activity                 | 0.049        |
|         | GO:0008810 | cellulase activity                          | 0.050        |
|         | GO:0016836 | hydro-lyase activity                        | 0.050        |
|         | GO:0032553 | ribonucleotide binding                      | 0.050        |
|         | GO:0032555 | purine ribonucleotide binding               | 0.050        |
|         | GO:0016835 | carbon-oxygen lyase activity                | 0.051        |
|         | GO:0015075 | ion transmembrane transporter activity      | 0.051        |
|         | GO:0017076 | purine nucleotide binding                   | 0.051        |
|         | GO:0052716 | hydroquinone:oxygen oxidoreductase activ... | 0.057        |
|         | GO:0060589 | nucleoside-triphosphatase regulator acti... | 0.059        |
|         | GO:0016717 | oxidoreductase activity, acting on paire... | 0.061        |
|         | GO:0005524 | ATP binding                                 | 0.062        |
|         | GO:0016615 | malate dehydrogenase activity               | 0.062        |
|         | GO:0051015 | actin filament binding                      | 0.062        |
|         | GO:0019899 | enzyme binding                              | 0.066        |
|         | GO:0046910 | pectinesterase inhibitor activity           | 0.069        |
|         | GO:0051087 | chaperone binding                           | 0.072        |
|         | GO:0015020 | glucuronosyltransferase activity            | 0.079        |
|         | GO:0019104 | DNA N-glycosylase activity                  | 0.079        |
|         | GO:0046527 | glucosyltransferase activity                | 0.081        |
|         | GO:0030234 | enzyme regulator activity                   | 0.084        |
|         | GO:0016651 | oxidoreductase activity, acting on NAD(P... | 0.084        |
|         | GO:0043168 | anion binding                               | 0.084        |
|         | GO:0004129 | cytochrome-c oxidase activity               | 0.085        |
|         | GO:0015002 | heme-copper terminal oxidase activity       | 0.085        |
|         | GO:0016675 | oxidoreductase activity, acting on a hem... | 0.085        |
|         | GO:0016676 | oxidoreductase activity, acting on a hem... | 0.085        |
|         | GO:0004185 | serine-type carboxypeptidase activity       | 0.089        |
|         | GO:0032559 | adenyl ribonucleotide binding               | 0.089        |
|         | GO:0001883 | purine nucleoside binding                   | 0.090        |
|         | GO:0005525 | GTP binding                                 | 0.090        |
|         | GO:0019001 | guanyl nucleotide binding                   | 0.090        |
|         | GO:0030554 | adenyl nucleotide binding                   | 0.090        |
|         | GO:0032550 | purine ribonucleoside binding               | 0.090        |
|         | GO:0032561 | guanyl ribonucleotide binding               | 0.090        |
|         | GO:0008144 | drug binding                                | 0.091        |
|         | GO:0005096 | GTPase activator activity                   | 0.092        |
|         | GO:0016829 | lyase activity                              | 0.092        |
|         | GO:0001882 | nucleoside binding                          | 0.093        |
|         | GO:0046983 | protein dimerization activity               | 0.099        |

#### 4.3.8 Root - Preflowering - Cluster 8

| GO type | GO ID      | Description                                 | Adj. p-value |
|---------|------------|---------------------------------------------|--------------|
|         | GO:0042737 | drug catabolic process                      | 0.000        |
|         | GO:0010383 | cell wall polysaccharide metabolic proce... | 0.000        |
|         | GO:0044036 | cell wall macromolecule metabolic proces... | 0.000        |
|         | GO:0019748 | secondary metabolic process                 | 0.000        |
|         | GO:0009832 | plant-type cell wall biogenesis             | 0.000        |
|         | GO:0044281 | small molecule metabolic process            | 0.000        |
|         | GO:0043436 | oxoacid metabolic process                   | 0.000        |
|         | GO:0006082 | organic acid metabolic process              | 0.000        |
|         | GO:0055086 | nucleobase-containing small molecule met... | 0.000        |
|         | GO:0007017 | microtubule-based process                   | 0.000        |
|         | GO:0044550 | secondary metabolite biosynthetic proces... | 0.000        |
|         | GO:0070592 | cell wall polysaccharide biosynthetic pr... | 0.000        |
|         | GO:0016053 | organic acid biosynthetic process           | 0.000        |
|         | GO:0046394 | carboxylic acid biosynthetic process        | 0.000        |
|         | GO:0043648 | dicarboxylic acid metabolic process         | 0.000        |
|         | GO:0010038 | response to metal ion                       | 0.000        |
|         | GO:0009808 | lignin metabolic process                    | 0.000        |
|         | GO:0006732 | coenzyme metabolic process                  | 0.001        |
|         | GO:0045489 | pectin biosynthetic process                 | 0.002        |
|         | GO:0006810 | transport                                   | 0.002        |
|         | GO:0019722 | calcium-mediated signaling                  | 0.002        |
|         | GO:1902600 | proton transmembrane transport              | 0.002        |
|         | GO:0006811 | ion transport                               | 0.002        |
|         | GO:0051179 | localization                                | 0.003        |
|         | GO:0006884 | cell volume homeostasis                     | 0.003        |
|         | GO:0009992 | cellular water homeostasis                  | 0.003        |
|         | GO:0015793 | glycerol transport                          | 0.003        |
|         | GO:0019637 | organophosphate metabolic process           | 0.003        |
|         | GO:0051234 | establishment of localization               | 0.003        |
|         | GO:0030148 | sphingolipid biosynthetic process           | 0.003        |
|         | GO:0006270 | DNA replication initiation                  | 0.004        |
|         | GO:0009060 | aerobic respiration                         | 0.004        |
|         | GO:0015985 | energy coupled proton transport, down el... | 0.004        |
|         | GO:0015986 | ATP synthesis coupled proton transport      | 0.004        |
|         | GO:0000910 | cytokinesis                                 | 0.005        |
|         | GO:0006091 | generation of precursor metabolites and ... | 0.005        |
|         | GO:0034404 | nucleobase-containing small molecule bio... | 0.005        |
|         | GO:0030104 | water homeostasis                           | 0.005        |
|         | GO:1903047 | mitotic cell cycle process                  | 0.006        |
|         | GO:0006833 | water transport                             | 0.006        |
|         | GO:0042044 | fluid transport                             | 0.006        |
|         | GO:0009225 | nucleotide-sugar metabolic process          | 0.006        |
|         | GO:0019932 | second-messenger-mediated signaling         | 0.006        |
|         | GO:0009108 | coenzyme biosynthetic process               | 0.006        |
|         | GO:0009404 | toxin metabolic process                     | 0.006        |
|         | GO:0060560 | developmental growth involved in morphog... | 0.007        |

Continued on next page

| GO type | GO ID      | Description                                 | Adj. p-value |
|---------|------------|---------------------------------------------|--------------|
|         | GO:0006101 | citrate metabolic process                   | 0.007        |
|         | GO:0007010 | cytoskeleton organization                   | 0.008        |
|         | GO:0016049 | cell growth                                 | 0.009        |
|         | GO:0055082 | cellular chemical homeostasis               | 0.010        |
|         | GO:0046364 | monosaccharide biosynthetic process         | 0.011        |
|         | GO:0006099 | tricarboxylic acid cycle                    | 0.011        |
|         | GO:0022904 | respiratory electron transport chain        | 0.012        |
|         | GO:0009407 | toxin catabolic process                     | 0.012        |
|         | GO:0000278 | mitotic cell cycle                          | 0.012        |
|         | GO:0009826 | unidimensional cell growth                  | 0.013        |
|         | GO:0048468 | cell development                            | 0.015        |
|         | GO:0061640 | cytoskeleton-dependent cytokinesis          | 0.016        |
|         | GO:0008610 | lipid biosynthetic process                  | 0.016        |
|         | GO:0010345 | suberin biosynthetic process                | 0.016        |
|         | GO:1903338 | regulation of cell wall organization or ... | 0.017        |
|         | GO:0015791 | polyol transport                            | 0.017        |
|         | GO:0072350 | tricarboxylic acid metabolic process        | 0.020        |
|         | GO:0008643 | carbohydrate transport                      | 0.020        |
|         | GO:0018209 | peptidyl-serine modification                | 0.020        |
|         | GO:2000652 | regulation of secondary cell wall biogen... | 0.021        |
|         | GO:0000281 | mitotic cytokinesis                         | 0.022        |
|         | GO:0010413 | glucuronoxylan metabolic process            | 0.023        |
|         | GO:0010417 | glucuronoxylan biosynthetic process         | 0.023        |
|         | GO:0034220 | ion transmembrane transport                 | 0.023        |
|         | GO:0019953 | sexual reproduction                         | 0.030        |
|         | GO:0018105 | peptidyl-serine phosphorylation             | 0.030        |
|         | GO:0010026 | trichome differentiation                    | 0.032        |
|         | GO:0005996 | monosaccharide metabolic process            | 0.035        |
|         | GO:0044703 | multi-organism reproductive process         | 0.035        |
|         | GO:0009395 | phospholipid catabolic process              | 0.036        |
|         | GO:0008361 | regulation of cell size                     | 0.038        |
|         | GO:0090376 | seed trichome differentiation               | 0.038        |
|         | GO:0009074 | aromatic amino acid family catabolic pro... | 0.039        |
|         | GO:0007154 | cell communication                          | 0.039        |
|         | GO:0015980 | energy derivation by oxidation of organi... | 0.040        |
|         | GO:0032989 | cellular component morphogenesis            | 0.041        |
|         | GO:0046274 | lignin catabolic process                    | 0.042        |
|         | GO:0055085 | transmembrane transport                     | 0.043        |
|         | GO:0090407 | organophosphate biosynthetic process        | 0.046        |
|         | GO:0042221 | response to chemical                        | 0.048        |
|         | GO:1901575 | organic substance catabolic process         | 0.053        |
|         | GO:0006888 | ER to Golgi vesicle-mediated transport      | 0.054        |
|         | GO:0000902 | cell morphogenesis                          | 0.055        |
|         | GO:0015850 | organic hydroxy compound transport          | 0.059        |
|         | GO:0019321 | pentose metabolic process                   | 0.059        |
|         | GO:0006575 | cellular modified amino acid metabolic p... | 0.060        |
|         | GO:0000904 | cell morphogenesis involved in different... | 0.061        |
|         | GO:0006812 | cation transport                            | 0.061        |
|         | GO:0035556 | intracellular signal transduction           | 0.064        |

Continued on next page

| GO type | GO ID      | Description                                 | Adj. p-value |
|---------|------------|---------------------------------------------|--------------|
|         | GO:0019439 | aromatic compound catabolic process         | 0.068        |
|         | GO:0006793 | phosphorus metabolic process                | 0.069        |
|         | GO:0000911 | cytokinesis by cell plate formation         | 0.070        |
|         | GO:0009226 | nucleotide-sugar biosynthetic process       | 0.070        |
|         | GO:0090378 | seed trichome elongation                    | 0.079        |
|         | GO:0051235 | maintenance of location                     | 0.084        |
|         | GO:0010043 | response to zinc ion                        | 0.093        |
|         | GO:0006665 | sphingolipid metabolic process              | 0.094        |
|         | GO:0060260 | regulation of transcription initiation f... | 0.094        |
|         | GO:0060261 | positive regulation of transcription ini... | 0.094        |
|         | GO:1901361 | organic cyclic compound catabolic proces... | 0.094        |
|         | GO:2000142 | regulation of DNA-templated transcriptio... | 0.094        |
|         | GO:2000144 | positive regulation of DNA-templated tra... | 0.094        |
|         | GO:0040007 | growth                                      | 0.094        |
|         | GO:0051261 | protein depolymerization                    | 0.099        |
|         | GO:0016054 | organic acid catabolic process              | 0.099        |
|         | GO:0033866 | nucleoside bisphosphate biosynthetic pro... | 0.099        |
|         | GO:0034030 | ribonucleoside bisphosphate biosynthetic... | 0.099        |
|         | GO:0034033 | purine nucleoside bisphosphate biosynthe... | 0.099        |
|         | GO:0046271 | phenylpropanoid catabolic process           | 0.099        |
|         | GO:0046395 | carboxylic acid catabolic process           | 0.099        |
|         | GO:1901264 | carbohydrate derivative transport           | 0.099        |
|         | GO:0070469 | respiratory chain                           | 0.000        |
|         | GO:0098800 | inner mitochondrial membrane protein com... | 0.000        |
|         | GO:0044445 | cytosolic part                              | 0.000        |
|         | GO:0005740 | mitochondrial envelope                      | 0.000        |
|         | GO:0031225 | anchored component of membrane              | 0.000        |
|         | GO:1990204 | oxidoreductase complex                      | 0.000        |
|         | GO:0044431 | Golgi apparatus part                        | 0.000        |
|         | GO:0000502 | proteasome complex                          | 0.000        |
|         | GO:0044437 | vacuolar part                               | 0.000        |
|         | GO:0005839 | proteasome core complex                     | 0.000        |
|         | GO:0005829 | cytosol                                     | 0.000        |
|         | GO:0032993 | protein-DNA complex                         | 0.001        |
|         | GO:0070069 | cytochrome complex                          | 0.002        |
|         | GO:0005838 | proteasome regulatory particle              | 0.002        |
|         | GO:0019773 | proteasome core complex, alpha-subunit c... | 0.002        |
|         | GO:0022624 | proteasome accessory complex                | 0.002        |
|         | GO:0033176 | proton-transporting V-type ATPase comple... | 0.002        |
|         | GO:0009524 | phragmoplast                                | 0.003        |
|         | GO:0005876 | spindle microtubule                         | 0.003        |
| CC      | GO:0005739 | mitochondrion                               | 0.006        |
|         | GO:0008540 | proteasome regulatory particle, base sub... | 0.017        |
|         | GO:0031595 | nuclear proteasome complex                  | 0.022        |
|         | GO:0030120 | vesicle coat                                | 0.036        |
|         | GO:0030662 | coated vesicle membrane                     | 0.037        |
|         | GO:0030135 | coated vesicle                              | 0.043        |
|         | GO:0031597 | cytosolic proteasome complex                | 0.048        |
|         | GO:0030659 | cytoplasmic vesicle membrane                | 0.050        |

Continued on next page



| GO type | GO ID      | Description                                 | Adj. p-value |
|---------|------------|---------------------------------------------|--------------|
|         | GO:0044444 | cytoplasmic part                            | 0.055        |
|         | GO:0000788 | nuclear nucleosome                          | 0.058        |
|         | GO:0030660 | Golgi-associated vesicle membrane           | 0.060        |
|         | GO:0044432 | endoplasmic reticulum part                  | 0.060        |
|         | GO:0033178 | proton-transporting two-sector ATPase co... | 0.067        |
|         | GO:0030136 | clathrin-coated vesicle                     | 0.077        |
|         | GO:0009504 | cell plate                                  | 0.078        |
|         | GO:0044433 | cytoplasmic vesicle part                    | 0.080        |
|         | GO:0005737 | cytoplasm                                   | 0.084        |
|         | GO:0000325 | plant-type vacuole                          | 0.097        |
|         | GO:0000347 | THO complex                                 | 0.097        |
|         | GO:0012506 | vesicle membrane                            | 0.100        |
|         | GO:0016798 | hydrolase activity, acting on glycosyl b... | 0.000        |
|         | GO:0016491 | oxidoreductase activity                     | 0.000        |
|         | GO:0005215 | transporter activity                        | 0.000        |
|         | GO:0022857 | transmembrane transporter activity          | 0.000        |
|         | GO:0016830 | carbon-carbon lyase activity                | 0.000        |
|         | GO:0016831 | carboxy-lyase activity                      | 0.000        |
|         | GO:0050662 | coenzyme binding                            | 0.000        |
|         | GO:0015318 | inorganic molecular entity transmembrane... | 0.000        |
|         | GO:0005088 | Ras guanyl-nucleotide exchange factor ac... | 0.001        |
|         | GO:0004650 | polygalacturonase activity                  | 0.001        |
|         | GO:0015075 | ion transmembrane transporter activity      | 0.001        |
|         | GO:0046933 | proton-transporting ATP synthase activit... | 0.001        |
|         | GO:0016857 | racemase and epimerase activity, acting ... | 0.001        |
|         | GO:0008194 | UDP-glycosyltransferase activity            | 0.002        |
|         | GO:0015144 | carbohydrate transmembrane transporter a... | 0.002        |
|         | GO:0016679 | oxidoreductase activity, acting on diphe... | 0.002        |
|         | GO:0005085 | guanyl-nucleotide exchange factor activi... | 0.002        |
|         | GO:0008238 | exopeptidase activity                       | 0.002        |
|         | GO:0015077 | monovalent inorganic cation transmembran... | 0.002        |
|         | GO:0030276 | clathrin binding                            | 0.002        |
|         | GO:0000287 | magnesium ion binding                       | 0.003        |
|         | GO:0036442 | proton-exporting ATPase activity            | 0.003        |
|         | GO:0046961 | proton-transporting ATPase activity, rot... | 0.003        |
|         | GO:0004565 | beta-galactosidase activity                 | 0.003        |
|         | GO:0017048 | Rho GTPase binding                          | 0.004        |
|         | GO:0015078 | proton transmembrane transporter activit... | 0.004        |
|         | GO:0008374 | O-acyltransferase activity                  | 0.004        |
|         | GO:0015925 | galactosidase activity                      | 0.004        |
|         | GO:0016835 | carbon-oxygen lyase activity                | 0.004        |
|         | GO:0016682 | oxidoreductase activity, acting on diphe... | 0.005        |
|         | GO:1901618 | organic hydroxy compound transmembrane t... | 0.006        |
|         | GO:0004683 | calmodulin-dependent protein kinase acti... | 0.006        |
|         | GO:0009931 | calcium-dependent protein serine/threoni... | 0.006        |
|         | GO:0010857 | calcium-dependent protein kinase activit... | 0.006        |
|         | GO:0005089 | Rho guanyl-nucleotide exchange factor ac... | 0.006        |
|         | GO:0015166 | polyol transmembrane transporter activit... | 0.006        |
|         | GO:0015020 | glucuronosyltransferase activity            | 0.007        |

Continued on next page

| GO type | GO ID      | Description                                 | Adj. p-value |
|---------|------------|---------------------------------------------|--------------|
|         | GO:0022890 | inorganic cation transmembrane transport... | 0.007        |
|         | GO:0005200 | structural constituent of cytoskeleton      | 0.008        |
|         | GO:0008081 | phosphoric diester hydrolase activity       | 0.008        |
|         | GO:0022804 | active transmembrane transporter activit... | 0.009        |
|         | GO:0008324 | cation transmembrane transporter activit... | 0.009        |
|         | GO:0022838 | substrate-specific channel activity         | 0.009        |
|         | GO:0046982 | protein heterodimerization activity         | 0.012        |
|         | GO:0001883 | purine nucleoside binding                   | 0.012        |
|         | GO:0005525 | GTP binding                                 | 0.012        |
|         | GO:0016854 | racemase and epimerase activity             | 0.012        |
|         | GO:0019001 | guanyl nucleotide binding                   | 0.012        |
|         | GO:0032550 | purine ribonucleoside binding               | 0.012        |
|         | GO:0032561 | guanyl ribonucleotide binding               | 0.012        |
|         | GO:0052716 | hydroquinone:oxygen oxidoreductase activ... | 0.012        |
|         | GO:0015267 | channel activity                            | 0.014        |
|         | GO:0022803 | passive transmembrane transporter activi... | 0.014        |
|         | GO:0051287 | NAD binding                                 | 0.014        |
|         | GO:0032549 | ribonucleoside binding                      | 0.015        |
|         | GO:0004427 | inorganic diphosphatase activity            | 0.016        |
|         | GO:0001882 | nucleoside binding                          | 0.017        |
|         | GO:0004364 | glutathione transferase activity            | 0.017        |
|         | GO:0008509 | anion transmembrane transporter activity    | 0.021        |
|         | GO:0004743 | pyruvate kinase activity                    | 0.025        |
|         | GO:0030955 | potassium ion binding                       | 0.025        |
|         | GO:0031420 | alkali metal ion binding                    | 0.025        |
|         | GO:0015103 | inorganic anion transmembrane transporte... | 0.025        |
|         | GO:0003779 | actin binding                               | 0.026        |
|         | GO:0042578 | phosphoric ester hydrolase activity         | 0.027        |
|         | GO:0046912 | transferase activity, transferring acyl ... | 0.027        |
|         | GO:0016651 | oxidoreductase activity, acting on NAD(P... | 0.029        |
|         | GO:0047372 | acylglycerol lipase activity                | 0.030        |
|         | GO:0016782 | transferase activity, transferring sulfu... | 0.037        |
|         | GO:0016838 | carbon-oxygen lyase activity, acting on ... | 0.044        |
|         | GO:0016836 | hydro-lyase activity                        | 0.044        |
|         | GO:0030170 | pyridoxal phosphate binding                 | 0.047        |
|         | GO:0070279 | vitamin B6 binding                          | 0.047        |
|         | GO:0070569 | uridylyltransferase activity                | 0.049        |
|         | GO:0019842 | vitamin binding                             | 0.050        |
|         | GO:0016407 | acetyltransferase activity                  | 0.065        |
|         | GO:1901505 | carbohydrate derivative transmembrane tr... | 0.083        |
|         | GO:0016799 | hydrolase activity, hydrolyzing N-glycos... | 0.091        |
|         | GO:0019829 | cation-transporting ATPase activity         | 0.096        |
|         | GO:0022853 | active ion transmembrane transporter act... | 0.096        |
|         | GO:0042625 | ATPase coupled ion transmembrane transpo... | 0.096        |

#### 4.3.9 Root - Preflowering - Cluster 9

| GO type | GO ID      | Description                                 | Adj. p-value                             |       |
|---------|------------|---------------------------------------------|------------------------------------------|-------|
| BP      | GO:0006396 | RNA processing                              | 0.000                                    |       |
|         | GO:0006464 | cellular protein modification process       | 0.000                                    |       |
|         | GO:0006351 | transcription, DNA-templated                | 0.000                                    |       |
|         | GO:0034470 | ncRNA processing                            | 0.000                                    |       |
|         | GO:0009451 | RNA modification                            | 0.000                                    |       |
|         | GO:0006259 | DNA metabolic process                       | 0.000                                    |       |
|         | GO:0008033 | tRNA processing                             | 0.000                                    |       |
|         | GO:0051276 | chromosome organization                     | 0.000                                    |       |
|         | GO:0006400 | tRNA modification                           | 0.002                                    |       |
|         | GO:0006399 | tRNA metabolic process                      | 0.004                                    |       |
|         | GO:0006793 | phosphorus metabolic process                | 0.004                                    |       |
|         | GO:0034654 | nucleobase-containing compound biosynthe... | 0.005                                    |       |
|         | GO:0009812 | flavonoid metabolic process                 | 0.006                                    |       |
|         | GO:2000241 | regulation of reproductive process          | 0.008                                    |       |
|         | GO:0002098 | tRNA wobble uridine modification            | 0.014                                    |       |
|         | GO:0070192 | chromosome organization involved in meio... | 0.014                                    |       |
|         | GO:0140013 | meiotic nuclear division                    | 0.014                                    |       |
|         | GO:0048285 | organelle fission                           | 0.014                                    |       |
|         | GO:2000026 | regulation of multicellular organismal d... | 0.016                                    |       |
|         | GO:0007127 | meiosis I                                   | 0.016                                    |       |
|         | GO:0061982 | meiosis I cell cycle process                | 0.016                                    |       |
|         | GO:1903046 | meiotic cell cycle process                  | 0.017                                    |       |
|         | GO:0044267 | cellular protein metabolic process          | 0.018                                    |       |
|         | GO:0022414 | reproductive process                        | 0.018                                    |       |
|         | GO:0051321 | meiotic cell cycle                          | 0.021                                    |       |
|         | GO:0006310 | DNA recombination                           | 0.023                                    |       |
|         | GO:0000280 | nuclear division                            | 0.023                                    |       |
|         | GO:0048580 | regulation of post-embryonic development    | 0.024                                    |       |
|         | GO:0002097 | tRNA wobble base modification               | 0.026                                    |       |
|         | GO:0019538 | protein metabolic process                   | 0.027                                    |       |
|         | GO:0000003 | reproduction                                | 0.030                                    |       |
|         | GO:0051239 | regulation of multicellular organismal p... | 0.030                                    |       |
|         | GO:0009736 | cytokinin-activated signaling pathway       | 0.036                                    |       |
|         | GO:0007131 | reciprocal meiotic recombination            | 0.042                                    |       |
|         | GO:0035825 | homologous recombination                    | 0.042                                    |       |
|         | GO:0071368 | cellular response to cytokinin stimulus     | 0.057                                    |       |
|         | GO:0033554 | cellular response to stress                 | 0.068                                    |       |
|         | GO:0050793 | regulation of developmental process         | 0.069                                    |       |
|         | GO:0022402 | cell cycle process                          | 0.074                                    |       |
|         | GO:0000160 | phosphorelay signal transduction system     | 0.080                                    |       |
|         | CC         | GO:0005654                                  | nucleoplasm                              | 0.000 |
|         |            | GO:0043231                                  | intracellular membrane-bounded organelle | 0.067 |
|         |            | GO:0043227                                  | membrane-bounded organelle               | 0.098 |
|         | GO:0000166 | nucleotide binding                          | 0.000                                    |       |
|         | GO:0042623 | ATPase activity, coupled                    | 0.000                                    |       |
|         | GO:0016887 | ATPase activity                             | 0.000                                    |       |

Continued on next page

| GO type | GO ID      | Description                                 | Adj. p-value |
|---------|------------|---------------------------------------------|--------------|
|         | GO:0017111 | nucleoside-triphosphatase activity          | 0.000        |
|         | GO:0004519 | endonuclease activity                       | 0.001        |
|         | GO:0003677 | DNA binding                                 | 0.001        |
|         | GO:0016817 | hydrolase activity, acting on acid anhyd... | 0.001        |
|         | GO:0016462 | pyrophosphatase activity                    | 0.002        |
|         | GO:0008094 | DNA-dependent ATPase activity               | 0.002        |
|         | GO:0016818 | hydrolase activity, acting on acid anhyd... | 0.002        |
|         | GO:0140097 | catalytic activity, acting on DNA           | 0.032        |
|         | GO:0005506 | iron ion binding                            | 0.042        |
|         | GO:0043565 | sequence-specific DNA binding               | 0.058        |
|         | GO:0004497 | monooxygenase activity                      | 0.067        |
|         | GO:0016740 | transferase activity                        | 0.067        |
|         | GO:0016705 | oxidoreductase activity, acting on paire... | 0.070        |
|         | GO:0051213 | dioxygenase activity                        | 0.074        |
|         | GO:0003700 | DNA binding transcription factor activit... | 0.094        |

#### 4.3.10 Root - Preflowering - Cluster 10

| GO type    | GO ID      | Description                                 | Adj. p-value                                |       |
|------------|------------|---------------------------------------------|---------------------------------------------|-------|
| BP         | GO:0042493 | response to drug                            | 0.000                                       |       |
|            | GO:0019219 | regulation of nucleobase-containing comp... | 0.005                                       |       |
|            | GO:2000112 | regulation of cellular macromolecule bio... | 0.006                                       |       |
|            | GO:0010468 | regulation of gene expression               | 0.007                                       |       |
|            | GO:0055114 | oxidation-reduction process                 | 0.007                                       |       |
|            | GO:1903506 | regulation of nucleic acid-templated tra... | 0.007                                       |       |
|            | GO:2001141 | regulation of RNA biosynthetic process      | 0.007                                       |       |
|            | GO:0009627 | systemic acquired resistance                | 0.009                                       |       |
|            | GO:0010556 | regulation of macromolecule biosynthetic... | 0.018                                       |       |
|            | GO:0006351 | transcription, DNA-templated                | 0.018                                       |       |
|            | GO:0006749 | glutathione metabolic process               | 0.020                                       |       |
|            | GO:0044550 | secondary metabolite biosynthetic proces... | 0.023                                       |       |
|            | GO:0031326 | regulation of cellular biosynthetic proc... | 0.027                                       |       |
|            | GO:0032446 | protein modification by small protein co... | 0.029                                       |       |
|            | GO:0009617 | response to bacterium                       | 0.030                                       |       |
|            | GO:0009889 | regulation of biosynthetic process          | 0.034                                       |       |
|            | GO:0006855 | drug transmembrane transport                | 0.034                                       |       |
|            | GO:0015893 | drug transport                              | 0.034                                       |       |
|            | GO:0046677 | response to antibiotic                      | 0.045                                       |       |
|            | GO:0097659 | nucleic acid-templated transcription        | 0.050                                       |       |
|            | GO:0010243 | response to organonitrogen compound         | 0.051                                       |       |
|            | GO:0032774 | RNA biosynthetic process                    | 0.061                                       |       |
|            | GO:0016567 | protein ubiquitination                      | 0.086                                       |       |
|            | GO:0042742 | defense response to bacterium               | 0.088                                       |       |
|            | GO:0006829 | zinc ion transport                          | 0.090                                       |       |
|            | GO:0009607 | response to biotic stimulus                 | 0.090                                       |       |
|            | CC         | GO:0044459                                  | plasma membrane part                        | 0.018 |
| GO:0004497 |            | monooxygenase activity                      | 0.000                                       |       |
| GO:0016705 |            | oxidoreductase activity, acting on paire... | 0.000                                       |       |
| GO:0015291 |            | secondary active transmembrane transport... | 0.000                                       |       |
| GO:0022857 |            | transmembrane transporter activity          | 0.000                                       |       |
| GO:0005215 |            | transporter activity                        | 0.000                                       |       |
| GO:0022804 |            | active transmembrane transporter activit... | 0.001                                       |       |
| GO:0046527 |            | glucosyltransferase activity                | 0.002                                       |       |
| GO:0035639 |            | purine ribonucleoside triphosphate bindi... | 0.002                                       |       |
| GO:0008194 |            | UDP-glycosyltransferase activity            | 0.002                                       |       |
| GO:0015318 |            | inorganic molecular entity transmembrane... | 0.002                                       |       |
| GO:0051213 |            | dioxygenase activity                        | 0.002                                       |       |
| GO:0004364 |            | glutathione transferase activity            | 0.003                                       |       |
| MF         |            | GO:0043167                                  | ion binding                                 | 0.004 |
|            |            | GO:0019787                                  | ubiquitin-like protein transferase activ... | 0.010 |
|            | GO:0015075 | ion transmembrane transporter activity      | 0.010                                       |       |
|            | GO:0048037 | cofactor binding                            | 0.015                                       |       |
|            | GO:0001871 | pattern binding                             | 0.017                                       |       |
|            | GO:0030247 | polysaccharide binding                      | 0.017                                       |       |
|            | GO:0016758 | transferase activity, transferring hexos... | 0.028                                       |       |

Continued on next page

---

| GO type | GO ID      | Description                                 | Adj. p-value |
|---------|------------|---------------------------------------------|--------------|
|         | GO:0003677 | DNA binding                                 | 0.031        |
|         | GO:0004842 | ubiquitin-protein transferase activity      | 0.033        |
|         | GO:0046914 | transition metal ion binding                | 0.043        |
|         | GO:0005385 | zinc ion transmembrane transporter activ... | 0.056        |
|         | GO:0008324 | cation transmembrane transporter activit... | 0.057        |
|         | GO:0015238 | drug transmembrane transporter activity     | 0.073        |
|         | GO:0016829 | lyase activity                              | 0.091        |

---

#### 4.3.11 Root - Preflowering - Cluster 11

| GO type | GO ID      | Description                                 | Adj. p-value |
|---------|------------|---------------------------------------------|--------------|
|         | GO:0005976 | polysaccharide metabolic process            | 0.000        |
|         | GO:0044264 | cellular polysaccharide metabolic proces... | 0.000        |
|         | GO:0044042 | glucan metabolic process                    | 0.000        |
|         | GO:0006073 | cellular glucan metabolic process           | 0.000        |
|         | GO:0005975 | carbohydrate metabolic process              | 0.000        |
|         | GO:0016052 | carbohydrate catabolic process              | 0.000        |
|         | GO:0000272 | polysaccharide catabolic process            | 0.000        |
|         | GO:0044247 | cellular polysaccharide catabolic proces... | 0.000        |
|         | GO:0007010 | cytoskeleton organization                   | 0.000        |
|         | GO:0033043 | regulation of organelle organization        | 0.000        |
|         | GO:0048868 | pollen tube development                     | 0.000        |
|         | GO:0044275 | cellular carbohydrate catabolic process     | 0.000        |
|         | GO:0009790 | embryo development                          | 0.000        |
|         | GO:1903047 | mitotic cell cycle process                  | 0.000        |
|         | GO:0097237 | cellular response to toxic substance        | 0.001        |
|         | GO:0005982 | starch metabolic process                    | 0.001        |
|         | GO:0051128 | regulation of cellular component organiz... | 0.002        |
|         | GO:0051273 | beta-glucan metabolic process               | 0.002        |
|         | GO:0009791 | post-embryonic development                  | 0.002        |
|         | GO:0009555 | pollen development                          | 0.002        |
|         | GO:0009636 | response to toxic substance                 | 0.003        |
|         | GO:0030258 | lipid modification                          | 0.003        |
|         | GO:0040029 | regulation of gene expression, epigeneti... | 0.003        |
|         | GO:0032506 | cytokinetic process                         | 0.004        |
|         | GO:1902410 | mitotic cytokinetic process                 | 0.004        |
|         | GO:0006979 | response to oxidative stress                | 0.004        |
|         | GO:0009793 | embryo development ending in seed dorman... | 0.004        |
|         | GO:0098869 | cellular oxidant detoxification             | 0.004        |
|         | GO:0010393 | galacturonan metabolic process              | 0.004        |
|         | GO:0045488 | pectin metabolic process                    | 0.004        |
|         | GO:0005983 | starch catabolic process                    | 0.004        |
|         | GO:0031935 | regulation of chromatin silencing           | 0.004        |
|         | GO:0032535 | regulation of cellular component size       | 0.004        |
|         | GO:0090066 | regulation of anatomical structure size     | 0.004        |
|         | GO:0009826 | unidimensional cell growth                  | 0.005        |
|         | GO:0045489 | pectin biosynthetic process                 | 0.005        |
|         | GO:0048731 | system development                          | 0.007        |
|         | GO:0050793 | regulation of developmental process         | 0.007        |
|         | GO:0009415 | response to water                           | 0.007        |
|         | GO:0051276 | chromosome organization                     | 0.007        |
|         | GO:0098657 | import into cell                            | 0.008        |
|         | GO:0009414 | response to water deprivation               | 0.010        |
|         | GO:0006012 | galactose metabolic process                 | 0.010        |
|         | GO:0015988 | energy coupled proton transmembrane tran... | 0.010        |
|         | GO:0015991 | ATP hydrolysis coupled proton transport     | 0.010        |
|         | GO:0090662 | ATP hydrolysis coupled transmembrane tra... | 0.010        |

Continued on next page

| GO type | GO ID      | Description                                         | Adj. p-value |
|---------|------------|-----------------------------------------------------|--------------|
|         | GO:0099131 | ATP hydrolysis coupled ion transmembrane...         | 0.010        |
|         | GO:0099132 | ATP hydrolysis coupled cation transmembr...         | 0.010        |
|         | GO:0009845 | seed germination                                    | 0.010        |
|         | GO:0008361 | regulation of cell size                             | 0.012        |
|         | GO:0055046 | microgametogenesis                                  | 0.012        |
|         | GO:0000226 | microtubule cytoskeleton organization               | 0.012        |
|         | GO:0000726 | non-recombinational repair                          | 0.012        |
|         | GO:0006303 | double-strand break repair via nonhomolo...         | 0.012        |
|         | GO:0009932 | cell tip growth                                     | 0.012        |
|         | GO:0009642 | response to light intensity                         | 0.013        |
|         | GO:0097305 | response to alcohol                                 | 0.014        |
|         | GO:0001101 | response to acid chemical                           | 0.015        |
|         | GO:0006897 | endocytosis                                         | 0.015        |
|         | GO:0022406 | membrane docking                                    | 0.015        |
|         | GO:0140056 | organelle localization by membrane tethe...         | 0.015        |
|         | GO:0072330 | monocarboxylic acid biosynthetic process            | 0.016        |
|         | GO:0048468 | cell development                                    | 0.016        |
|         | GO:0048229 | gametophyte development                             | 0.017        |
|         | GO:0048278 | vesicle docking                                     | 0.018        |
|         | GO:0044255 | cellular lipid metabolic process                    | 0.018        |
|         | GO:0016042 | lipid catabolic process                             | 0.019        |
|         | GO:0090351 | seedling development                                | 0.019        |
|         | GO:0006986 | response to unfolded protein                        | 0.019        |
|         | GO:0009888 | tissue development                                  | 0.020        |
|         | GO:0048608 | reproductive structure development                  | 0.020        |
|         | GO:0061458 | reproductive system development                     | 0.020        |
|         | GO:0010033 | response to organic substance                       | 0.020        |
|         | GO:0006457 | protein folding                                     | 0.022        |
|         | GO:0030104 | water homeostasis                                   | 0.022        |
|         | GO:0009737 | response to abscisic acid                           | 0.024        |
|         | GO:0033993 | response to lipid                                   | 0.024        |
|         | GO:0019915 | lipid storage                                       | 0.026        |
|         | GO:0022603 | regulation of anatomical structure morph...         | 0.026        |
|         | GO:0051567 | histone H3-K9 methylation                           | 0.026        |
|         | GO:0061647 | histone H3-K9 modification                          | 0.026        |
|         | GO:0046486 | glycerolipid metabolic process                      | 0.026        |
|         | GO:0065008 | regulation of biological quality                    | 0.027        |
|         | GO:0010035 | response to inorganic substance                     | 0.027        |
|         | GO:0010191 | mucilage metabolic process                          | 0.028        |
|         | GO:0006075 | (1- $\beta$ 3)-beta-D-glucan biosynthetic proces... | 0.028        |
|         | GO:0046434 | organophosphate catabolic process                   | 0.028        |
|         | GO:0009644 | response to high light intensity                    | 0.029        |
|         | GO:0008154 | actin polymerization or depolymerization            | 0.030        |
|         | GO:0010029 | regulation of seed germination                      | 0.030        |
|         | GO:0046854 | phosphatidylinositol phosphorylation                | 0.030        |
|         | GO:0019637 | organophosphate metabolic process                   | 0.031        |
|         | GO:1900140 | regulation of seedling development                  | 0.031        |
|         | GO:0000302 | response to reactive oxygen species                 | 0.032        |
|         | GO:0018205 | peptidyl-lysine modification                        | 0.032        |

Continued on next page



| GO type | GO ID      | Description                                 | Adj. p-value |
|---------|------------|---------------------------------------------|--------------|
|         | GO:0050826 | response to freezing                        | 0.034        |
|         | GO:0071470 | cellular response to osmotic stress         | 0.035        |
|         | GO:0048193 | Golgi vesicle transport                     | 0.038        |
|         | GO:0006644 | phospholipid metabolic process              | 0.038        |
|         | GO:0009123 | nucleoside monophosphate metabolic proce... | 0.038        |
|         | GO:0043647 | inositol phosphate metabolic process        | 0.038        |
|         | GO:0010192 | mucilage biosynthetic process               | 0.038        |
|         | GO:0006884 | cell volume homeostasis                     | 0.039        |
|         | GO:0009161 | ribonucleoside monophosphate metabolic p... | 0.039        |
|         | GO:0009992 | cellular water homeostasis                  | 0.039        |
|         | GO:0015791 | polyol transport                            | 0.039        |
|         | GO:0015793 | glycerol transport                          | 0.039        |
|         | GO:0051274 | beta-glucan biosynthetic process            | 0.039        |
|         | GO:0006089 | lactate metabolic process                   | 0.040        |
|         | GO:0019243 | methylglyoxal catabolic process to D-lac... | 0.040        |
|         | GO:0061727 | methylglyoxal catabolic process to lacta... | 0.040        |
|         | GO:0008064 | regulation of actin polymerization or de... | 0.041        |
|         | GO:0030832 | regulation of actin filament length         | 0.041        |
|         | GO:0032956 | regulation of actin cytoskeleton organiz... | 0.041        |
|         | GO:0032970 | regulation of actin filament-based proce... | 0.041        |
|         | GO:0034968 | histone lysine methylation                  | 0.041        |
|         | GO:0110053 | regulation of actin filament organizatio... | 0.041        |
|         | GO:0005984 | disaccharide metabolic process              | 0.041        |
|         | GO:0007389 | pattern specification process               | 0.041        |
|         | GO:0000723 | telomere maintenance                        | 0.041        |
|         | GO:0032200 | telomere organization                       | 0.041        |
|         | GO:0033044 | regulation of chromosome organization       | 0.041        |
|         | GO:0030245 | cellulose catabolic process                 | 0.041        |
|         | GO:0042180 | cellular ketone metabolic process           | 0.042        |
|         | GO:0071214 | cellular response to abiotic stimulus       | 0.047        |
|         | GO:0104004 | cellular response to environmental stimu... | 0.047        |
|         | GO:0050896 | response to stimulus                        | 0.048        |
|         | GO:0005985 | sucrose metabolic process                   | 0.049        |
|         | GO:0006631 | fatty acid metabolic process                | 0.049        |
|         | GO:0006970 | response to osmotic stress                  | 0.049        |
|         | GO:0030029 | actin filament-based process                | 0.049        |
|         | GO:0060968 | regulation of gene silencing                | 0.049        |
|         | GO:1902275 | regulation of chromatin organization        | 0.050        |
|         | GO:0006650 | glycerophospholipid metabolic process       | 0.050        |
|         | GO:0048359 | mucilage metabolic process involved in s... | 0.050        |
|         | GO:0097435 | supramolecular fiber organization           | 0.050        |
|         | GO:0016579 | protein deubiquitination                    | 0.051        |
|         | GO:0046834 | lipid phosphorylation                       | 0.051        |
|         | GO:0046185 | aldehyde catabolic process                  | 0.051        |
|         | GO:0006950 | response to stress                          | 0.051        |
|         | GO:0034614 | cellular response to reactive oxygen spe... | 0.053        |
|         | GO:0009438 | methylglyoxal metabolic process             | 0.054        |
|         | GO:0042182 | ketone catabolic process                    | 0.054        |
|         | GO:0051596 | methylglyoxal catabolic process             | 0.054        |

Continued on next page

| GO type | GO ID      | Description                                   | Adj. p-value |
|---------|------------|-----------------------------------------------|--------------|
|         | GO:0009126 | purine nucleoside monophosphate metaboli...   | 0.054        |
|         | GO:0009167 | purine ribonucleoside monophosphate meta...   | 0.054        |
|         | GO:0042391 | regulation of membrane potential              | 0.055        |
|         | GO:0030041 | actin filament polymerization                 | 0.055        |
|         | GO:0030833 | regulation of actin filament polymerizat...   | 0.055        |
|         | GO:0009259 | ribonucleotide metabolic process              | 0.056        |
|         | GO:0006074 | (1- $\beta$ )-beta-D-glucan metabolic process | 0.057        |
|         | GO:0006833 | water transport                               | 0.059        |
|         | GO:0009166 | nucleotide catabolic process                  | 0.059        |
|         | GO:0042044 | fluid transport                               | 0.059        |
|         | GO:0035966 | response to topologically incorrect prot...   | 0.060        |
|         | GO:0051275 | beta-glucan catabolic process                 | 0.060        |
|         | GO:0030004 | cellular monovalent inorganic cation hom...   | 0.062        |
|         | GO:0060249 | anatomical structure homeostasis              | 0.062        |
|         | GO:0051493 | regulation of cytoskeleton organization       | 0.064        |
|         | GO:0009741 | response to brassinosteroid                   | 0.064        |
|         | GO:0016570 | histone modification                          | 0.065        |
|         | GO:0034404 | nucleobase-containing small molecule bio...   | 0.065        |
|         | GO:0009725 | response to hormone                           | 0.065        |
|         | GO:0033554 | cellular response to stress                   | 0.065        |
|         | GO:0046034 | ATP metabolic process                         | 0.067        |
|         | GO:0009719 | response to endogenous stimulus               | 0.067        |
|         | GO:0015850 | organic hydroxy compound transport            | 0.067        |
|         | GO:1901292 | nucleoside phosphate catabolic process        | 0.067        |
|         | GO:0010876 | lipid localization                            | 0.068        |
|         | GO:0019359 | nicotinamide nucleotide biosynthetic pro...   | 0.071        |
|         | GO:0048878 | chemical homeostasis                          | 0.071        |
|         | GO:0006096 | glycolytic process                            | 0.071        |
|         | GO:0006757 | ATP generation from ADP                       | 0.071        |
|         | GO:0009135 | purine nucleoside diphosphate metabolic ...   | 0.071        |
|         | GO:0009179 | purine ribonucleoside diphosphate metabo...   | 0.071        |
|         | GO:0009185 | ribonucleoside diphosphate metabolic pro...   | 0.071        |
|         | GO:0042866 | pyruvate biosynthetic process                 | 0.071        |
|         | GO:0046031 | ADP metabolic process                         | 0.071        |
|         | GO:0009127 | purine nucleoside monophosphate biosynth...   | 0.075        |
|         | GO:0009168 | purine ribonucleoside monophosphate bios...   | 0.075        |
|         | GO:0010214 | seed coat development                         | 0.077        |
|         | GO:0006002 | fructose 6-phosphate metabolic process        | 0.080        |
|         | GO:0030036 | actin cytoskeleton organization               | 0.081        |
|         | GO:0003002 | regionalization                               | 0.082        |
|         | GO:0018022 | peptidyl-lysine methylation                   | 0.086        |
|         | GO:1902903 | regulation of supramolecular fiber organ...   | 0.086        |
|         | GO:0016571 | histone methylation                           | 0.086        |
|         | GO:0051085 | chaperone cofactor-dependent protein ref...   | 0.086        |
|         | GO:0009201 | ribonucleoside triphosphate biosynthetic...   | 0.089        |
|         | GO:1901000 | regulation of response to salt stress         | 0.089        |
|         | GO:0009260 | ribonucleotide biosynthetic process           | 0.091        |
|         | GO:0046390 | ribose phosphate biosynthetic process         | 0.091        |
|         | GO:0021700 | developmental maturation                      | 0.094        |

Continued on next page

| GO type | GO ID      | Description                                 | Adj. p-value |
|---------|------------|---------------------------------------------|--------------|
|         | GO:0006816 | calcium ion transport                       | 0.095        |
|         | GO:0019363 | pyridine nucleotide biosynthetic process    | 0.097        |
|         | GO:0022604 | regulation of cell morphogenesis            | 0.098        |
|         | GO:0030117 | membrane coat                               | 0.002        |
|         | GO:0048475 | coated membrane                             | 0.002        |
|         | GO:0033176 | proton-transporting V-type ATPase comple... | 0.003        |
|         | GO:0098588 | bounding membrane of organelle              | 0.005        |
|         | GO:0031982 | vesicle                                     | 0.009        |
|         | GO:0005819 | spindle                                     | 0.012        |
|         | GO:0005886 | plasma membrane                             | 0.015        |
|         | GO:0005773 | vacuole                                     | 0.018        |
|         | GO:0005802 | trans-Golgi network                         | 0.019        |
|         | GO:0005811 | lipid droplet                               | 0.020        |
|         | GO:0097708 | intracellular vesicle                       | 0.021        |
|         | GO:0000148 | 1,3-beta-D-glucan synthase complex          | 0.022        |
|         | GO:0030135 | coated vesicle                              | 0.023        |
|         | GO:0031410 | cytoplasmic vesicle                         | 0.023        |
|         | GO:0030659 | cytoplasmic vesicle membrane                | 0.030        |
|         | GO:0005911 | cell-cell junction                          | 0.039        |
|         | GO:0009506 | plasmodesma                                 | 0.039        |
|         | GO:0030054 | cell junction                               | 0.039        |
| CC      | GO:0030662 | coated vesicle membrane                     | 0.039        |
|         | GO:0031984 | organelle subcompartment                    | 0.039        |
|         | GO:0044459 | plasma membrane part                        | 0.039        |
|         | GO:0055044 | symplast                                    | 0.039        |
|         | GO:0090406 | pollen tube                                 | 0.039        |
|         | GO:0012506 | vesicle membrane                            | 0.045        |
|         | GO:0044437 | vacuolar part                               | 0.048        |
|         | GO:0005774 | vacuolar membrane                           | 0.050        |
|         | GO:0009705 | plant-type vacuole membrane                 | 0.056        |
|         | GO:0000782 | telomere cap complex                        | 0.056        |
|         | GO:0000783 | nuclear telomere cap complex                | 0.056        |
|         | GO:0044433 | cytoplasmic vesicle part                    | 0.063        |
|         | GO:0030120 | vesicle coat                                | 0.070        |
|         | GO:0031226 | intrinsic component of plasma membrane      | 0.070        |
|         | GO:0098805 | whole membrane                              | 0.072        |
|         | GO:0000781 | chromosome, telomeric region                | 0.073        |
|         | GO:0030133 | transport vesicle                           | 0.075        |
|         | GO:0009504 | cell plate                                  | 0.077        |
|         | GO:0033178 | proton-transporting two-sector ATPase co... | 0.083        |
|         | GO:0000325 | plant-type vacuole                          | 0.093        |
|         | GO:0004553 | hydrolase activity, hydrolyzing O-glycos... | 0.000        |
|         | GO:0017111 | nucleoside-triphosphatase activity          | 0.000        |
|         | GO:0019783 | ubiquitin-like protein-specific protease... | 0.001        |
|         | GO:0043168 | anion binding                               | 0.003        |
|         | GO:0003824 | catalytic activity                          | 0.004        |
|         | GO:0016407 | acetyltransferase activity                  | 0.004        |
|         | GO:0016307 | phosphatidylinositol phosphate kinase ac... | 0.005        |
|         | GO:0030554 | adenyl nucleotide binding                   | 0.006        |

Continued on next page

| GO type | GO ID      | Description                                 | Adj. p-value |
|---------|------------|---------------------------------------------|--------------|
|         | GO:0036094 | small molecule binding                      | 0.006        |
|         | GO:0005515 | protein binding                             | 0.007        |
|         | GO:0032559 | adenyl ribonucleotide binding               | 0.007        |
|         | GO:0017076 | purine nucleotide binding                   | 0.008        |
|         | GO:0051087 | chaperone binding                           | 0.009        |
|         | GO:0032553 | ribonucleotide binding                      | 0.010        |
|         | GO:0032555 | purine ribonucleotide binding               | 0.010        |
|         | GO:0097367 | carbohydrate derivative binding             | 0.011        |
|         | GO:0008289 | lipid binding                               | 0.011        |
|         | GO:0005524 | ATP binding                                 | 0.014        |
|         | GO:0015925 | galactosidase activity                      | 0.014        |
|         | GO:0005261 | cation channel activity                     | 0.015        |
|         | GO:0043167 | ion binding                                 | 0.016        |
|         | GO:0035639 | purine ribonucleoside triphosphate bindi... | 0.019        |
|         | GO:0008144 | drug binding                                | 0.026        |
|         | GO:0004567 | beta-mannosidase activity                   | 0.027        |
|         | GO:0016757 | transferase activity, transferring glyco... | 0.027        |
|         | GO:0008270 | zinc ion binding                            | 0.027        |
|         | GO:0018024 | histone-lysine N-methyltransferase activ... | 0.027        |
|         | GO:0016788 | hydrolase activity, acting on ester bond... | 0.027        |
|         | GO:0015923 | mannosidase activity                        | 0.028        |
|         | GO:0003843 | 1,3-beta-D-glucan synthase activity         | 0.030        |
|         | GO:0060589 | nucleoside-triphosphatase regulator acti... | 0.030        |
|         | GO:0016903 | oxidoreductase activity, acting on the a... | 0.035        |
|         | GO:0051082 | unfolded protein binding                    | 0.040        |
|         | GO:0005372 | water transmembrane transporter activity    | 0.040        |
|         | GO:0015250 | water channel activity                      | 0.040        |
|         | GO:0015254 | glycerol channel activity                   | 0.040        |
|         | GO:0015267 | channel activity                            | 0.040        |
|         | GO:0022803 | passive transmembrane transporter activi... | 0.040        |
|         | GO:0022838 | substrate-specific channel activity         | 0.040        |
|         | GO:0036459 | thiol-dependent ubiquitinyl hydrolase ac... | 0.046        |
|         | GO:0101005 | ubiquitinyl hydrolase activity              | 0.046        |
|         | GO:1901681 | sulfur compound binding                     | 0.046        |
|         | GO:0015166 | polyol transmembrane transporter activit... | 0.052        |
|         | GO:0004650 | polygalacturonase activity                  | 0.053        |
|         | GO:0015168 | glycerol transmembrane transporter activ... | 0.053        |
|         | GO:0035091 | phosphatidylinositol binding                | 0.056        |
|         | GO:0005488 | binding                                     | 0.057        |
|         | GO:0050661 | NADP binding                                | 0.058        |
|         | GO:1901618 | organic hydroxy compound transmembrane t... | 0.059        |
|         | GO:0015926 | glucosidase activity                        | 0.068        |
|         | GO:0016620 | oxidoreductase activity, acting on the a... | 0.068        |
|         | GO:0008810 | cellulase activity                          | 0.080        |
|         | GO:0043621 | protein self-association                    | 0.081        |
|         | GO:0015085 | calcium ion transmembrane transporter ac... | 0.088        |
|         | GO:0036442 | proton-exporting ATPase activity            | 0.090        |
|         | GO:0008443 | phosphofructokinase activity                | 0.092        |
|         | GO:0022843 | voltage-gated cation channel activity       | 0.095        |

Continued on next page

---

| GO type | GO ID      | Description                                 | Adj. p-value |
|---------|------------|---------------------------------------------|--------------|
|         | GO:0051015 | actin filament binding                      | 0.095        |
|         | GO:0004565 | beta-galactosidase activity                 | 0.095        |
|         | GO:0016278 | lysine N-methyltransferase activity         | 0.095        |
|         | GO:0016279 | protein-lysine N-methyltransferase activ... | 0.095        |

---

#### 4.3.12 Root - Preflowering - Cluster 12

| GO type | GO ID      | Description                                 | Adj. p-value |
|---------|------------|---------------------------------------------|--------------|
|         | GO:0019748 | secondary metabolic process                 | 0.000        |
|         | GO:0009698 | phenylpropanoid metabolic process           | 0.000        |
|         | GO:0010383 | cell wall polysaccharide metabolic proce... | 0.000        |
|         | GO:0009832 | plant-type cell wall biogenesis             | 0.000        |
|         | GO:0072330 | monocarboxylic acid biosynthetic process    | 0.000        |
|         | GO:0001101 | response to acid chemical                   | 0.000        |
|         | GO:0046351 | disaccharide biosynthetic process           | 0.000        |
|         | GO:0009753 | response to jasmonic acid                   | 0.000        |
|         | GO:0045492 | xylan biosynthetic process                  | 0.000        |
|         | GO:0071229 | cellular response to acid chemical          | 0.000        |
|         | GO:0006063 | uronic acid metabolic process               | 0.000        |
|         | GO:0009867 | jasmonic acid mediated signaling pathway    | 0.000        |
|         | GO:0009725 | response to hormone                         | 0.000        |
|         | GO:0009414 | response to water deprivation               | 0.001        |
|         | GO:0071495 | cellular response to endogenous stimulus    | 0.002        |
|         | GO:0009620 | response to fungus                          | 0.002        |
|         | GO:0032870 | cellular response to hormone stimulus       | 0.002        |
|         | GO:0006950 | response to stress                          | 0.002        |
|         | GO:0031407 | oxylipin metabolic process                  | 0.002        |
|         | GO:1903506 | regulation of nucleic acid-templated tra... | 0.003        |
|         | GO:2001141 | regulation of RNA biosynthetic process      | 0.003        |
|         | GO:0048878 | chemical homeostasis                        | 0.003        |
|         | GO:0051273 | beta-glucan metabolic process               | 0.004        |
|         | GO:0048544 | recognition of pollen                       | 0.004        |
|         | GO:0034220 | ion transmembrane transport                 | 0.004        |
|         | GO:0055082 | cellular chemical homeostasis               | 0.005        |
|         | GO:0009311 | oligosaccharide metabolic process           | 0.005        |
|         | GO:0009755 | hormone-mediated signaling pathway          | 0.005        |
|         | GO:0010345 | suberin biosynthetic process                | 0.005        |
|         | GO:0031408 | oxylipin biosynthetic process               | 0.005        |
|         | GO:0042445 | hormone metabolic process                   | 0.005        |
|         | GO:0008037 | cell recognition                            | 0.005        |
|         | GO:0050794 | regulation of cellular process              | 0.005        |
|         | GO:0033692 | cellular polysaccharide biosynthetic pro... | 0.007        |
|         | GO:0051252 | regulation of RNA metabolic process         | 0.007        |
|         | GO:0030244 | cellulose biosynthetic process              | 0.007        |
|         | GO:0043207 | response to external biotic stimulus        | 0.007        |
|         | GO:0051707 | response to other organism                  | 0.007        |
|         | GO:0009875 | pollen-pistil interaction                   | 0.008        |
|         | GO:0007264 | small GTPase mediated signal transductio... | 0.009        |
|         | GO:0031347 | regulation of defense response              | 0.009        |
|         | GO:0006631 | fatty acid metabolic process                | 0.009        |
|         | GO:0046777 | protein autophosphorylation                 | 0.011        |
|         | GO:0009695 | jasmonic acid biosynthetic process          | 0.012        |
|         | GO:0071310 | cellular response to organic substance      | 0.012        |
|         | GO:0065007 | biological regulation                       | 0.012        |

Continued on next page

| GO type | GO ID      | Description                                 | Adj. p-value |
|---------|------------|---------------------------------------------|--------------|
|         | GO:0050789 | regulation of biological process            | 0.014        |
|         | GO:0010817 | regulation of hormone levels                | 0.014        |
|         | GO:0010143 | cutin biosynthetic process                  | 0.015        |
|         | GO:0019219 | regulation of nucleobase-containing comp... | 0.016        |
|         | GO:0097659 | nucleic acid-templated transcription        | 0.017        |
|         | GO:0032774 | RNA biosynthetic process                    | 0.018        |
|         | GO:0051716 | cellular response to stimulus               | 0.018        |
|         | GO:0006355 | regulation of transcription, DNA-templat... | 0.018        |
|         | GO:0009969 | xyloglucan biosynthetic process             | 0.018        |
|         | GO:0009605 | response to external stimulus               | 0.018        |
|         | GO:0044281 | small molecule metabolic process            | 0.018        |
|         | GO:0055081 | anion homeostasis                           | 0.021        |
|         | GO:0016053 | organic acid biosynthetic process           | 0.022        |
|         | GO:0046394 | carboxylic acid biosynthetic process        | 0.022        |
|         | GO:0051275 | beta-glucan catabolic process               | 0.022        |
|         | GO:0010646 | regulation of cell communication            | 0.023        |
|         | GO:0010215 | cellulose microfibril organization          | 0.025        |
|         | GO:0009966 | regulation of signal transduction           | 0.025        |
|         | GO:0009694 | jasmonic acid metabolic process             | 0.026        |
|         | GO:0023051 | regulation of signaling                     | 0.027        |
|         | GO:0010556 | regulation of macromolecule biosynthetic... | 0.030        |
|         | GO:0080134 | regulation of response to stress            | 0.031        |
|         | GO:0009617 | response to bacterium                       | 0.031        |
|         | GO:0009269 | response to desiccation                     | 0.032        |
|         | GO:0035556 | intracellular signal transduction           | 0.033        |
|         | GO:0051704 | multi-organism process                      | 0.033        |
|         | GO:0046686 | response to cadmium ion                     | 0.034        |
|         | GO:0006820 | anion transport                             | 0.036        |
|         | GO:0048268 | clathrin coat assembly                      | 0.036        |
|         | GO:0009751 | response to salicylic acid                  | 0.037        |
|         | GO:0098542 | defense response to other organism          | 0.040        |
|         | GO:0009889 | regulation of biosynthetic process          | 0.040        |
|         | GO:0042545 | cell wall modification                      | 0.041        |
|         | GO:0031326 | regulation of cellular biosynthetic proc... | 0.043        |
|         | GO:0006633 | fatty acid biosynthetic process             | 0.043        |
|         | GO:0050832 | defense response to fungus                  | 0.051        |
|         | GO:0009863 | salicylic acid mediated signaling pathwa... | 0.052        |
|         | GO:0070726 | cell wall assembly                          | 0.059        |
|         | GO:0071668 | plant-type cell wall assembly               | 0.059        |
|         | GO:0046677 | response to antibiotic                      | 0.061        |
|         | GO:0071446 | cellular response to salicylic acid stim... | 0.062        |
|         | GO:0050801 | ion homeostasis                             | 0.068        |
|         | GO:0009856 | pollination                                 | 0.068        |
|         | GO:0044706 | multi-multicellular organism process        | 0.068        |
|         | GO:0046364 | monosaccharide biosynthetic process         | 0.070        |
|         | GO:0051274 | beta-glucan biosynthetic process            | 0.070        |
|         | GO:0010214 | seed coat development                       | 0.073        |
|         | GO:0065008 | regulation of biological quality            | 0.074        |
|         | GO:0019438 | aromatic compound biosynthetic process      | 0.077        |

Continued on next page

| GO type    | GO ID                                       | Description                                 | Adj. p-value |
|------------|---------------------------------------------|---------------------------------------------|--------------|
|            | GO:0009690                                  | cytokinin metabolic process                 | 0.080        |
|            | GO:0006351                                  | transcription, DNA-templated                | 0.080        |
|            | GO:0036065                                  | fucosylation                                | 0.082        |
|            | GO:0006970                                  | response to osmotic stress                  | 0.089        |
|            | GO:0006790                                  | sulfur compound metabolic process           | 0.090        |
|            | GO:0009069                                  | serine family amino acid metabolic proce... | 0.091        |
|            | GO:0071215                                  | cellular response to abscisic acid stimu... | 0.099        |
|            | GO:0097306                                  | cellular response to alcohol                | 0.099        |
| CC         | GO:0031225                                  | anchored component of membrane              | 0.000        |
|            | GO:0044421                                  | extracellular region part                   | 0.000        |
|            | GO:0009521                                  | photosystem                                 | 0.004        |
|            | GO:0005769                                  | early endosome                              | 0.014        |
|            | GO:0005768                                  | endosome                                    | 0.019        |
|            | GO:0090406                                  | pollen tube                                 | 0.044        |
|            | GO:0012505                                  | endomembrane system                         | 0.063        |
|            | GO:0009523                                  | photosystem II                              | 0.096        |
| MF         | GO:0016491                                  | oxidoreductase activity                     | 0.000        |
|            | GO:0016773                                  | phosphotransferase activity, alcohol gro... | 0.000        |
|            | GO:0030246                                  | carbohydrate binding                        | 0.000        |
|            | GO:0016705                                  | oxidoreductase activity, acting on paire... | 0.000        |
|            | GO:0015318                                  | inorganic molecular entity transmembrane... | 0.000        |
|            | GO:0004805                                  | trehalose-phosphatase activity              | 0.001        |
|            | GO:0015075                                  | ion transmembrane transporter activity      | 0.001        |
|            | GO:0016791                                  | phosphatase activity                        | 0.002        |
|            | GO:0015020                                  | glucuronosyltransferase activity            | 0.002        |
|            | GO:0008081                                  | phosphoric diester hydrolase activity       | 0.003        |
|            | GO:0019203                                  | carbohydrate phosphatase activity           | 0.004        |
|            | GO:0030276                                  | clathrin binding                            | 0.004        |
|            | GO:0005516                                  | calmodulin binding                          | 0.004        |
|            | GO:0022838                                  | substrate-specific channel activity         | 0.005        |
|            | GO:0016759                                  | cellulose synthase activity                 | 0.005        |
|            | GO:0016760                                  | cellulose synthase (UDP-forming) activit... | 0.005        |
|            | GO:0008422                                  | beta-glucosidase activity                   | 0.005        |
|            | GO:0043565                                  | sequence-specific DNA binding               | 0.005        |
|            | GO:0008236                                  | serine-type peptidase activity              | 0.005        |
|            | GO:0017171                                  | serine hydrolase activity                   | 0.005        |
|            | GO:0042285                                  | xylosyltransferase activity                 | 0.006        |
|            | GO:0008107                                  | galactoside 2-alpha-L-fucosyltransferase... | 0.006        |
|            | GO:0031127                                  | alpha-(1,2)-fucosyltransferase activity     | 0.006        |
|            | GO:0004871                                  | signal transducer activity                  | 0.006        |
|            | GO:0015018                                  | galactosylgalactosylxylosylprotein 3-bet... | 0.007        |
|            | GO:0015267                                  | channel activity                            | 0.009        |
|            | GO:0022803                                  | passive transmembrane transporter activi... | 0.009        |
|            | GO:0016838                                  | carbon-oxygen lyase activity, acting on ... | 0.010        |
|            | GO:0004602                                  | glutathione peroxidase activity             | 0.013        |
|            | GO:0015926                                  | glucosidase activity                        | 0.014        |
|            | GO:0003677                                  | DNA binding                                 | 0.015        |
|            | GO:0005545                                  | 1-phosphatidylinositol binding              | 0.016        |
| GO:0004683 | calmodulin-dependent protein kinase acti... | 0.018                                       |              |

Continued on next page



| GO type | GO ID      | Description                                 | Adj. p-value |
|---------|------------|---------------------------------------------|--------------|
|         | GO:0009931 | calcium-dependent protein serine/threoni... | 0.018        |
|         | GO:0010857 | calcium-dependent protein kinase activit... | 0.018        |
|         | GO:0022890 | inorganic cation transmembrane transport... | 0.021        |
|         | GO:0010333 | terpene synthase activity                   | 0.022        |
|         | GO:0097367 | carbohydrate derivative binding             | 0.023        |
|         | GO:0043168 | anion binding                               | 0.026        |
|         | GO:0015077 | monovalent inorganic cation transmembran... | 0.026        |
|         | GO:0004702 | signal transducer, downstream of recepto... | 0.030        |
|         | GO:0005057 | signal transducer activity, downstream o... | 0.030        |
|         | GO:0008417 | fucosyltransferase activity                 | 0.034        |
|         | GO:0016717 | oxidoreductase activity, acting on paire... | 0.034        |
|         | GO:0032559 | adenyl ribonucleotide binding               | 0.036        |
|         | GO:0001067 | regulatory region nucleic acid binding      | 0.040        |
|         | GO:0044212 | transcription regulatory region DNA bind... | 0.040        |
|         | GO:0008509 | anion transmembrane transporter activity    | 0.041        |
|         | GO:0030554 | adenyl nucleotide binding                   | 0.046        |
|         | GO:0016835 | carbon-oxygen lyase activity                | 0.049        |
|         | GO:0015079 | potassium ion transmembrane transporter ... | 0.051        |
|         | GO:0008378 | galactosyltransferase activity              | 0.055        |
|         | GO:0032553 | ribonucleotide binding                      | 0.071        |
|         | GO:0032555 | purine ribonucleotide binding               | 0.085        |
|         | GO:0050662 | coenzyme binding                            | 0.088        |
|         | GO:0008144 | drug binding                                | 0.094        |

#### 4.3.13 Root - Preflowering - Cluster 13

| GO type | GO ID      | Description                                 | Adj. p-value |
|---------|------------|---------------------------------------------|--------------|
|         | GO:0032446 | protein modification by small protein co... | 0.000        |
|         | GO:0055085 | transmembrane transport                     | 0.000        |
|         | GO:0009751 | response to salicylic acid                  | 0.000        |
|         | GO:0009753 | response to jasmonic acid                   | 0.002        |
|         | GO:0042430 | indole-containing compound metabolic pro... | 0.003        |
|         | GO:0006026 | aminoglycan catabolic process               | 0.005        |
|         | GO:0006030 | chitin metabolic process                    | 0.005        |
|         | GO:0006032 | chitin catabolic process                    | 0.005        |
|         | GO:0043207 | response to external biotic stimulus        | 0.005        |
|         | GO:0046348 | amino sugar catabolic process               | 0.005        |
|         | GO:0051707 | response to other organism                  | 0.005        |
|         | GO:1901072 | glucosamine-containing compound cataboli... | 0.005        |
|         | GO:0006749 | glutathione metabolic process               | 0.005        |
|         | GO:0009627 | systemic acquired resistance                | 0.005        |
|         | GO:0098542 | defense response to other organism          | 0.005        |
|         | GO:0006022 | aminoglycan metabolic process               | 0.007        |
|         | GO:0009867 | jasmonic acid mediated signaling pathway    | 0.008        |
|         | GO:0071395 | cellular response to jasmonic acid stimu... | 0.011        |
|         | GO:0043666 | regulation of phosphoprotein phosphatase... | 0.013        |
|         | GO:0006857 | oligopeptide transport                      | 0.013        |
|         | GO:0080163 | regulation of protein serine/threonine p... | 0.013        |
|         | GO:0006568 | tryptophan metabolic process                | 0.013        |
|         | GO:0006586 | indolalkylamine metabolic process           | 0.013        |
|         | GO:0044550 | secondary metabolite biosynthetic proces... | 0.013        |
|         | GO:1901071 | glucosamine-containing compound metaboli... | 0.013        |
|         | GO:0003333 | amino acid transmembrane transport          | 0.017        |
|         | GO:0010466 | negative regulation of peptidase activit... | 0.018        |
|         | GO:0010951 | negative regulation of endopeptidase act... | 0.018        |
|         | GO:0052547 | regulation of peptidase activity            | 0.018        |
|         | GO:0052548 | regulation of endopeptidase activity        | 0.018        |
|         | GO:1902022 | L-lysine transport                          | 0.018        |
| BP      | GO:1903401 | L-lysine transmembrane transport            | 0.018        |
|         | GO:0043648 | dicarboxylic acid metabolic process         | 0.019        |
|         | GO:0010921 | regulation of phosphatase activity          | 0.024        |
|         | GO:0035304 | regulation of protein dephosphorylation     | 0.024        |
|         | GO:0015893 | drug transport                              | 0.026        |
|         | GO:0035303 | regulation of dephosphorylation             | 0.026        |
|         | GO:0009617 | response to bacterium                       | 0.027        |
|         | GO:0045861 | negative regulation of proteolysis          | 0.027        |
|         | GO:0009862 | systemic acquired resistance, salicylic ... | 0.028        |
|         | GO:0007154 | cell communication                          | 0.028        |
|         | GO:0008643 | carbohydrate transport                      | 0.028        |
|         | GO:0000162 | tryptophan biosynthetic process             | 0.034        |
|         | GO:0005996 | monosaccharide metabolic process            | 0.034        |
|         | GO:0046219 | indolalkylamine biosynthetic process        | 0.034        |
|         | GO:0006865 | amino acid transport                        | 0.040        |

Continued on next page

| GO type | GO ID      | Description                                  | Adj. p-value |
|---------|------------|----------------------------------------------|--------------|
|         | GO:0006575 | cellular modified amino acid metabolic p...  | 0.043        |
|         | GO:0009611 | response to wounding                         | 0.048        |
|         | GO:0044092 | negative regulation of molecular functio...  | 0.048        |
|         | GO:0010112 | regulation of systemic acquired resistanc... | 0.054        |
|         | GO:1905039 | carboxylic acid transmembrane transport      | 0.054        |
|         | GO:0042447 | hormone catabolic process                    | 0.055        |
|         | GO:0006836 | neurotransmitter transport                   | 0.056        |
|         | GO:0006820 | anion transport                              | 0.061        |
|         | GO:0071229 | cellular response to acid chemical           | 0.075        |
|         | GO:0042537 | benzene-containing compound metabolic pr...  | 0.076        |
|         | GO:0043086 | negative regulation of catalytic activit...  | 0.076        |
|         | GO:0046942 | carboxylic acid transport                    | 0.076        |
|         | GO:1901698 | response to nitrogen compound                | 0.078        |
|         | GO:0009814 | defense response, incompatible interacti...  | 0.086        |
|         | GO:0009072 | aromatic amino acid family metabolic pro...  | 0.087        |
|         | GO:1903825 | organic acid transmembrane transport         | 0.092        |
|         | GO:0051346 | negative regulation of hydrolase activit...  | 0.096        |
| CC      | GO:0005886 | plasma membrane                              | 0.000        |
|         | GO:0031226 | intrinsic component of plasma membrane       | 0.003        |
|         | GO:0044459 | plasma membrane part                         | 0.013        |
|         | GO:0044421 | extracellular region part                    | 0.098        |
|         | GO:0016705 | oxidoreductase activity, acting on paire...  | 0.000        |
|         | GO:0019787 | ubiquitin-like protein transferase activ...  | 0.000        |
|         | GO:0015291 | secondary active transmembrane transport...  | 0.000        |
|         | GO:0022804 | active transmembrane transporter activit...  | 0.000        |
|         | GO:0022857 | transmembrane transporter activity           | 0.000        |
|         | GO:0035251 | UDP-glucosyltransferase activity             | 0.001        |
|         | GO:0000166 | nucleotide binding                           | 0.002        |
|         | GO:1901265 | nucleoside phosphate binding                 | 0.002        |
|         | GO:0004364 | glutathione transferase activity             | 0.002        |
|         | GO:0015293 | symporter activity                           | 0.002        |
|         | GO:0003677 | DNA binding                                  | 0.002        |
|         | GO:0004568 | chitinase activity                           | 0.002        |
|         | GO:0005351 | carbohydrate:proton symporter activity       | 0.003        |
|         | GO:0005402 | carbohydrate:cation symporter activity       | 0.003        |
|         | GO:0015295 | solute:proton symporter activity             | 0.003        |
|         | GO:0015294 | solute:cation symporter activity             | 0.004        |
|         | GO:0004857 | enzyme inhibitor activity                    | 0.005        |
|         | GO:0030414 | peptidase inhibitor activity                 | 0.005        |
|         | GO:0061134 | peptidase regulator activity                 | 0.005        |
|         | GO:0004864 | protein phosphatase inhibitor activity       | 0.006        |
|         | GO:0019212 | phosphatase inhibitor activity               | 0.006        |
|         | GO:0004866 | endopeptidase inhibitor activity             | 0.006        |
|         | GO:0061135 | endopeptidase regulator activity             | 0.006        |
|         | GO:0016830 | carbon-carbon lyase activity                 | 0.007        |
|         | GO:0015318 | inorganic molecular entity transmembrane...  | 0.007        |
|         | GO:0015181 | arginine transmembrane transporter activ...  | 0.009        |
|         | GO:0015189 | L-lysine transmembrane transporter activ...  | 0.009        |
|         | GO:0046527 | glucosyltransferase activity                 | 0.009        |

Continued on next page

| GO type | GO ID      | Description                                  | Adj. p-value |
|---------|------------|----------------------------------------------|--------------|
|         | GO:0019208 | phosphatase regulator activity               | 0.011        |
|         | GO:0019888 | protein phosphatase regulator activity       | 0.011        |
|         | GO:0015075 | ion transmembrane transporter activity       | 0.012        |
|         | GO:0001047 | core promoter binding                        | 0.015        |
|         | GO:0015172 | acidic amino acid transmembrane transport... | 0.015        |
|         | GO:0004867 | serine-type endopeptidase inhibitor acti...  | 0.018        |
|         | GO:0042562 | hormone binding                              | 0.020        |
|         | GO:0015297 | antiporter activity                          | 0.021        |
|         | GO:0016765 | transferase activity, transferring alkyl...  | 0.025        |
|         | GO:0019840 | isoprenoid binding                           | 0.025        |
|         | GO:0008194 | UDP-glycosyltransferase activity             | 0.025        |
|         | GO:0001046 | core promoter sequence-specific DNA bind...  | 0.025        |
|         | GO:0015144 | carbohydrate transmembrane transporter a...  | 0.026        |
|         | GO:0004190 | aspartic-type endopeptidase activity         | 0.027        |
|         | GO:0070001 | aspartic-type peptidase activity             | 0.027        |
|         | GO:0005326 | neurotransmitter transporter activity        | 0.027        |
|         | GO:0008324 | cation transmembrane transporter activit...  | 0.032        |
|         | GO:0015174 | basic amino acid transmembrane transport...  | 0.032        |
|         | GO:0015238 | drug transmembrane transporter activity      | 0.042        |
|         | GO:0001228 | transcriptional activator activity, RNA ...  | 0.043        |
|         | GO:0008483 | transaminase activity                        | 0.049        |
|         | GO:0016769 | transferase activity, transferring nitro...  | 0.049        |
|         | GO:0015171 | amino acid transmembrane transporter act...  | 0.050        |
|         | GO:0010427 | abscisic acid binding                        | 0.052        |
|         | GO:0048037 | cofactor binding                             | 0.065        |
|         | GO:0005385 | zinc ion transmembrane transporter activ...  | 0.073        |
|         | GO:0016758 | transferase activity, transferring hexos...  | 0.076        |
|         | GO:0046915 | transition metal ion transmembrane trans...  | 0.077        |
|         | GO:0016491 | oxidoreductase activity                      | 0.077        |
|         | GO:0004970 | ionotropic glutamate receptor activity       | 0.086        |
|         | GO:0005230 | extracellular ligand-gated ion channel a...  | 0.086        |
|         | GO:0008066 | glutamate receptor activity                  | 0.086        |
|         | GO:0022824 | transmitter-gated ion channel activity       | 0.086        |
|         | GO:0022835 | transmitter-gated channel activity           | 0.086        |

#### 4.3.14 Root - Preflowering - Cluster 14

| GO type | GO ID      | Description                                 | Adj. p-value |
|---------|------------|---------------------------------------------|--------------|
|         | GO:0010467 | gene expression                             | 0.000        |
|         | GO:0043603 | cellular amide metabolic process            | 0.000        |
|         | GO:1901564 | organonitrogen compound metabolic proces... | 0.000        |
|         | GO:0042254 | ribosome biogenesis                         | 0.000        |
|         | GO:0042273 | ribosomal large subunit biogenesis          | 0.000        |
|         | GO:0043161 | proteasome-mediated ubiquitin-dependent ... | 0.000        |
|         | GO:0032446 | protein modification by small protein co... | 0.000        |
|         | GO:0010498 | proteasomal protein catabolic process       | 0.001        |
|         | GO:0055085 | transmembrane transport                     | 0.002        |
|         | GO:0051603 | proteolysis involved in cellular protein... | 0.002        |
|         | GO:0044257 | cellular protein catabolic process          | 0.002        |
|         | GO:0043632 | modification-dependent macromolecule cat... | 0.003        |
|         | GO:0031323 | regulation of cellular metabolic process    | 0.004        |
|         | GO:0006511 | ubiquitin-dependent protein catabolic pr... | 0.004        |
|         | GO:0006355 | regulation of transcription, DNA-templat... | 0.004        |
|         | GO:0006568 | tryptophan metabolic process                | 0.004        |
|         | GO:0006586 | indolalkylamine metabolic process           | 0.004        |
|         | GO:0019941 | modification-dependent protein catabolic... | 0.004        |
|         | GO:0015749 | monosaccharide transmembrane transport      | 0.005        |
|         | GO:0043412 | macromolecule modification                  | 0.005        |
|         | GO:0046483 | heterocycle metabolic process               | 0.005        |
|         | GO:0051171 | regulation of nitrogen compound metaboli... | 0.005        |
|         | GO:2000112 | regulation of cellular macromolecule bio... | 0.005        |
|         | GO:0008645 | hexose transmembrane transport              | 0.006        |
|         | GO:0042364 | water-soluble vitamin biosynthetic proce... | 0.006        |
|         | GO:0060255 | regulation of macromolecule metabolic pr... | 0.006        |
|         | GO:1901565 | organonitrogen compound catabolic proces... | 0.007        |
|         | GO:0000027 | ribosomal large subunit assembly            | 0.007        |
|         | GO:0010921 | regulation of phosphatase activity          | 0.007        |
|         | GO:1904659 | glucose transmembrane transport             | 0.007        |
|         | GO:0031326 | regulation of cellular biosynthetic proc... | 0.008        |
|         | GO:0080090 | regulation of primary metabolic process     | 0.008        |
|         | GO:1903506 | regulation of nucleic acid-templated tra... | 0.008        |
|         | GO:2001141 | regulation of RNA biosynthetic process      | 0.008        |
|         | GO:0006836 | neurotransmitter transport                  | 0.008        |
|         | GO:0010556 | regulation of macromolecule biosynthetic... | 0.009        |
|         | GO:0030163 | protein catabolic process                   | 0.009        |
|         | GO:0006351 | transcription, DNA-templated                | 0.010        |
|         | GO:0000162 | tryptophan biosynthetic process             | 0.010        |
|         | GO:0046219 | indolalkylamine biosynthetic process        | 0.010        |
|         | GO:0009889 | regulation of biosynthetic process          | 0.011        |
|         | GO:0070647 | protein modification by small protein co... | 0.011        |
|         | GO:1901360 | organic cyclic compound metabolic proces... | 0.012        |
|         | GO:0019222 | regulation of metabolic process             | 0.014        |
|         | GO:0046323 | glucose import                              | 0.014        |
| BP      | GO:0080163 | regulation of protein serine/threonine p... | 0.014        |

Continued on next page

| GO type | GO ID      | Description                                 | Adj. p-value |
|---------|------------|---------------------------------------------|--------------|
|         | GO:0035303 | regulation of dephosphorylation             | 0.014        |
|         | GO:0051252 | regulation of RNA metabolic process         | 0.014        |
|         | GO:0009593 | detection of chemical stimulus              | 0.014        |
|         | GO:0043666 | regulation of phosphoprotein phosphatase... | 0.015        |
|         | GO:0015802 | basic amino acid transport                  | 0.015        |
|         | GO:0010468 | regulation of gene expression               | 0.016        |
|         | GO:0006508 | proteolysis                                 | 0.016        |
|         | GO:0019748 | secondary metabolic process                 | 0.017        |
|         | GO:0006725 | cellular aromatic compound metabolic pro... | 0.019        |
|         | GO:0042430 | indole-containing compound metabolic pro... | 0.019        |
|         | GO:0006464 | cellular protein modification process       | 0.020        |
|         | GO:0036211 | protein modification process                | 0.020        |
|         | GO:0044265 | cellular macromolecule catabolic process    | 0.020        |
|         | GO:0006857 | oligopeptide transport                      | 0.021        |
|         | GO:0097659 | nucleic acid-templated transcription        | 0.021        |
|         | GO:0019219 | regulation of nucleobase-containing comp... | 0.023        |
|         | GO:0006952 | defense response                            | 0.023        |
|         | GO:0032774 | RNA biosynthetic process                    | 0.025        |
|         | GO:1901607 | alpha-amino acid biosynthetic process       | 0.026        |
|         | GO:1905039 | carboxylic acid transmembrane transport     | 0.027        |
|         | GO:0035304 | regulation of protein dephosphorylation     | 0.028        |
|         | GO:0003333 | amino acid transmembrane transport          | 0.032        |
|         | GO:0000041 | transition metal ion transport              | 0.033        |
|         | GO:1903825 | organic acid transmembrane transport        | 0.039        |
|         | GO:0006414 | translational elongation                    | 0.044        |
|         | GO:0009110 | vitamin biosynthetic process                | 0.047        |
|         | GO:0006767 | water-soluble vitamin metabolic process     | 0.057        |
|         | GO:0008652 | cellular amino acid biosynthetic process    | 0.057        |
|         | GO:0000470 | maturation of LSU-rRNA                      | 0.058        |
|         | GO:0034219 | carbohydrate transmembrane transport        | 0.059        |
|         | GO:0042274 | ribosomal small subunit biogenesis          | 0.062        |
|         | GO:0045047 | protein targeting to ER                     | 0.063        |
|         | GO:0072599 | establishment of protein localization to... | 0.063        |
|         | GO:0071577 | zinc ion transmembrane transport            | 0.069        |
|         | GO:0009309 | amine biosynthetic process                  | 0.076        |
|         | GO:0042401 | cellular biogenic amine biosynthetic pro... | 0.076        |
|         | GO:0009073 | aromatic amino acid family biosynthetic ... | 0.077        |
|         | GO:0006829 | zinc ion transport                          | 0.082        |
|         | GO:0008037 | cell recognition                            | 0.087        |
|         | GO:0009072 | aromatic amino acid family metabolic pro... | 0.089        |
|         | GO:0006913 | nucleocytoplasmic transport                 | 0.091        |
|         | GO:0051169 | nuclear transport                           | 0.091        |
|         | GO:0006790 | sulfur compound metabolic process           | 0.095        |
|         | GO:0006865 | amino acid transport                        | 0.099        |
|         | GO:0033365 | protein localization to organelle           | 0.100        |
|         | GO:0005839 | proteasome core complex                     | 0.001        |
|         | GO:0016021 | integral component of membrane              | 0.002        |
|         | GO:0097526 | spliceosomal tri-snRNP complex              | 0.003        |
|         | GO:0031224 | intrinsic component of membrane             | 0.005        |

Continued on next page

| GO type | GO ID      | Description                                 | Adj. p-value |
|---------|------------|---------------------------------------------|--------------|
|         | GO:0005761 | mitochondrial ribosome                      | 0.007        |
|         | GO:0000313 | organellar ribosome                         | 0.010        |
|         | GO:0005887 | integral component of plasma membrane       | 0.012        |
|         | GO:0000315 | organellar large ribosomal subunit          | 0.014        |
|         | GO:0005762 | mitochondrial large ribosomal subunit       | 0.014        |
|         | GO:0044452 | nucleolar part                              | 0.014        |
|         | GO:0005686 | U2 snRNP                                    | 0.015        |
|         | GO:0019773 | proteasome core complex, alpha-subunit c... | 0.018        |
|         | GO:0046540 | U4/U6 x U5 tri-snRNP complex                | 0.028        |
|         | GO:0071011 | precatalytic spliceosome                    | 0.028        |
|         | GO:0005682 | U5 snRNP                                    | 0.034        |
|         | GO:0005732 | small nucleolar ribonucleoprotein comple... | 0.035        |
|         | GO:0016591 | DNA-directed RNA polymerase II, holoenzy... | 0.035        |
|         | GO:0030532 | small nuclear ribonucleoprotein complex     | 0.035        |
|         | GO:0097525 | spliceosomal snRNP complex                  | 0.035        |
|         | GO:0120114 | Sm-like protein family complex              | 0.035        |
|         | GO:0000323 | lytic vacuole                               | 0.036        |
|         | GO:0030684 | preribosome                                 | 0.036        |
|         | GO:0005764 | lysosome                                    | 0.092        |
|         | GO:0004672 | protein kinase activity                     | 0.000        |
|         | GO:0019787 | ubiquitin-like protein transferase activ... | 0.001        |
|         | GO:0019843 | rRNA binding                                | 0.002        |
|         | GO:0004497 | monooxygenase activity                      | 0.003        |
|         | GO:0016705 | oxidoreductase activity, acting on paire... | 0.003        |
|         | GO:0016709 | oxidoreductase activity, acting on paire... | 0.003        |
|         | GO:0015174 | basic amino acid transmembrane transport... | 0.005        |
|         | GO:0015145 | monosaccharide transmembrane transporter... | 0.006        |
|         | GO:0003700 | DNA binding transcription factor activit... | 0.007        |
|         | GO:0005326 | neurotransmitter transporter activity       | 0.007        |
|         | GO:0015149 | hexose transmembrane transporter activit... | 0.007        |
|         | GO:0022857 | transmembrane transporter activity          | 0.008        |
|         | GO:0015291 | secondary active transmembrane transport... | 0.008        |
|         | GO:0001047 | core promoter binding                       | 0.010        |
|         | GO:0005355 | glucose transmembrane transporter activi... | 0.011        |
|         | GO:0004864 | protein phosphatase inhibitor activity      | 0.012        |
|         | GO:0019212 | phosphatase inhibitor activity              | 0.012        |
|         | GO:0140110 | transcription regulator activity            | 0.012        |
|         | GO:0005506 | iron ion binding                            | 0.014        |
|         | GO:0001067 | regulatory region nucleic acid binding      | 0.016        |
|         | GO:0044212 | transcription regulatory region DNA bind... | 0.016        |
|         | GO:0015293 | symporter activity                          | 0.017        |
|         | GO:0020037 | heme binding                                | 0.017        |
|         | GO:0001046 | core promoter sequence-specific DNA bind... | 0.017        |
|         | GO:0051213 | dioxygenase activity                        | 0.017        |
|         | GO:0016765 | transferase activity, transferring alkyl... | 0.019        |
|         | GO:0016830 | carbon-carbon lyase activity                | 0.020        |
|         | GO:0019208 | phosphatase regulator activity              | 0.020        |
|         | GO:0019888 | protein phosphatase regulator activity      | 0.020        |
|         | GO:0051119 | sugar transmembrane transporter activity    | 0.023        |
| MF      |            |                                             |              |

Continued on next page

| GO type | GO ID      | Description                                 | Adj. p-value |
|---------|------------|---------------------------------------------|--------------|
|         | GO:0015295 | solute:proton symporter activity            | 0.025        |
|         | GO:0005215 | transporter activity                        | 0.025        |
|         | GO:0005351 | carbohydrate:proton symporter activity      | 0.025        |
|         | GO:0005402 | carbohydrate:cation symporter activity      | 0.025        |
|         | GO:0015294 | solute:cation symporter activity            | 0.025        |
|         | GO:0046982 | protein heterodimerization activity         | 0.026        |
|         | GO:0016773 | phosphotransferase activity, alcohol gro... | 0.027        |
|         | GO:0046906 | tetrapyrrole binding                        | 0.030        |
|         | GO:0035251 | UDP-glucosyltransferase activity            | 0.032        |
|         | GO:0005385 | zinc ion transmembrane transporter activ... | 0.035        |
|         | GO:0030246 | carbohydrate binding                        | 0.036        |
|         | GO:0043565 | sequence-specific DNA binding               | 0.036        |
|         | GO:0016740 | transferase activity                        | 0.039        |
|         | GO:0016301 | kinase activity                             | 0.039        |
|         | GO:0008134 | transcription factor binding                | 0.045        |
|         | GO:0008483 | transaminase activity                       | 0.045        |
|         | GO:0016769 | transferase activity, transferring nitro... | 0.045        |
|         | GO:0043178 | alcohol binding                             | 0.047        |
|         | GO:0015175 | neutral amino acid transmembrane transpo... | 0.048        |
|         | GO:0001228 | transcriptional activator activity, RNA ... | 0.054        |
|         | GO:0016772 | transferase activity, transferring phosp... | 0.063        |
|         | GO:0010427 | abscisic acid binding                       | 0.071        |
|         | GO:0008061 | chitin binding                              | 0.071        |
|         | GO:0046915 | transition metal ion transmembrane trans... | 0.071        |
|         | GO:0072509 | divalent inorganic cation transmembrane ... | 0.074        |
|         | GO:0008097 | 5S rRNA binding                             | 0.079        |
|         | GO:0004364 | glutathione transferase activity            | 0.086        |
|         | GO:0061630 | ubiquitin protein ligase activity           | 0.088        |
|         | GO:0004857 | enzyme inhibitor activity                   | 0.090        |
|         | GO:0015144 | carbohydrate transmembrane transporter a... | 0.092        |
|         | GO:0061659 | ubiquitin-like protein ligase activity      | 0.097        |



#### 4.3.15 Root - Preflowering - Cluster 15

| GO type | GO ID      | Description                                 | Adj. p-value |
|---------|------------|---------------------------------------------|--------------|
|         | GO:0051276 | chromosome organization                     | 0.000        |
|         | GO:0022402 | cell cycle process                          | 0.000        |
|         | GO:0009653 | anatomical structure morphogenesis          | 0.000        |
|         | GO:0003006 | developmental process involved in reprod... | 0.000        |
|         | GO:0007010 | cytoskeleton organization                   | 0.000        |
|         | GO:1903047 | mitotic cell cycle process                  | 0.000        |
|         | GO:0033043 | regulation of organelle organization        | 0.000        |
|         | GO:0016049 | cell growth                                 | 0.000        |
|         | GO:0009791 | post-embryonic development                  | 0.000        |
|         | GO:0040029 | regulation of gene expression, epigeneti... | 0.000        |
|         | GO:0006073 | cellular glucan metabolic process           | 0.000        |
|         | GO:0006281 | DNA repair                                  | 0.000        |
|         | GO:0000910 | cytokinesis                                 | 0.000        |
|         | GO:0006260 | DNA replication                             | 0.000        |
|         | GO:0006310 | DNA recombination                           | 0.000        |
|         | GO:0048589 | developmental growth                        | 0.000        |
|         | GO:0048868 | pollen tube development                     | 0.000        |
|         | GO:0048608 | reproductive structure development          | 0.000        |
|         | GO:0061458 | reproductive system development             | 0.000        |
|         | GO:0006325 | chromatin organization                      | 0.000        |
|         | GO:0048229 | gametophyte development                     | 0.000        |
|         | GO:0016052 | carbohydrate catabolic process              | 0.000        |
|         | GO:0050793 | regulation of developmental process         | 0.000        |
|         | GO:0070646 | protein modification by small protein re... | 0.000        |
|         | GO:0000272 | polysaccharide catabolic process            | 0.000        |
|         | GO:0009826 | unidimensional cell growth                  | 0.000        |
|         | GO:0010564 | regulation of cell cycle process            | 0.000        |
|         | GO:0033554 | cellular response to stress                 | 0.000        |
|         | GO:0010639 | negative regulation of organelle organiz... | 0.000        |
|         | GO:0048609 | multicellular organismal reproductive pr... | 0.000        |
|         | GO:0000904 | cell morphogenesis involved in different... | 0.001        |
|         | GO:0044247 | cellular polysaccharide catabolic proces... | 0.001        |
|         | GO:0009123 | nucleoside monophosphate metabolic proce... | 0.001        |
|         | GO:0009161 | ribonucleoside monophosphate metabolic p... | 0.002        |
|         | GO:0009860 | pollen tube growth                          | 0.002        |
|         | GO:0006261 | DNA-dependent DNA replication               | 0.002        |
|         | GO:0021700 | developmental maturation                    | 0.002        |
|         | GO:0009555 | pollen development                          | 0.002        |
|         | GO:0042542 | response to hydrogen peroxide               | 0.002        |
|         | GO:0060249 | anatomical structure homeostasis            | 0.002        |
|         | GO:0032259 | methylation                                 | 0.003        |
|         | GO:0097435 | supramolecular fiber organization           | 0.003        |
|         | GO:0045814 | negative regulation of gene expression, ... | 0.003        |
|         | GO:0048468 | cell development                            | 0.003        |
|         | GO:0099402 | plant organ development                     | 0.003        |
|         | GO:0009126 | purine nucleoside monophosphate metaboli... | 0.003        |

Continued on next page

| GO type | GO ID      | Description                                 | Adj. p-value |
|---------|------------|---------------------------------------------|--------------|
|         | GO:0009167 | purine ribonucleoside monophosphate meta... | 0.003        |
|         | GO:0009259 | ribonucleotide metabolic process            | 0.003        |
|         | GO:0009657 | plastid organization                        | 0.003        |
|         | GO:0006629 | lipid metabolic process                     | 0.003        |
|         | GO:0007131 | reciprocal meiotic recombination            | 0.003        |
|         | GO:0034968 | histone lysine methylation                  | 0.003        |
|         | GO:0035825 | homologous recombination                    | 0.003        |
|         | GO:0046034 | ATP metabolic process                       | 0.003        |
|         | GO:0009888 | tissue development                          | 0.003        |
|         | GO:0005982 | starch metabolic process                    | 0.003        |
|         | GO:0009932 | cell tip growth                             | 0.004        |
|         | GO:0030154 | cell differentiation                        | 0.004        |
|         | GO:0061077 | chaperone-mediated protein folding          | 0.004        |
|         | GO:0010393 | galacturonan metabolic process              | 0.004        |
|         | GO:0045488 | pectin metabolic process                    | 0.004        |
|         | GO:0006305 | DNA alkylation                              | 0.004        |
|         | GO:0006306 | DNA methylation                             | 0.004        |
|         | GO:0007127 | meiosis I                                   | 0.004        |
|         | GO:0061982 | meiosis I cell cycle process                | 0.004        |
|         | GO:0016579 | protein deubiquitination                    | 0.005        |
|         | GO:0045489 | pectin biosynthetic process                 | 0.005        |
|         | GO:0006091 | generation of precursor metabolites and ... | 0.005        |
|         | GO:0035194 | posttranscriptional gene silencing by RN... | 0.005        |
|         | GO:0060968 | regulation of gene silencing                | 0.005        |
|         | GO:0010052 | guard cell differentiation                  | 0.005        |
|         | GO:0008154 | actin polymerization or depolymerization    | 0.005        |
|         | GO:1900140 | regulation of seedling development          | 0.005        |
|         | GO:0006342 | chromatin silencing                         | 0.005        |
|         | GO:0018022 | peptidyl-lysine methylation                 | 0.006        |
|         | GO:0044786 | cell cycle DNA replication                  | 0.006        |
|         | GO:0046185 | aldehyde catabolic process                  | 0.006        |
|         | GO:0015980 | energy derivation by oxidation of organi... | 0.006        |
|         | GO:0090626 | plant epidermis morphogenesis               | 0.006        |
|         | GO:0007059 | chromosome segregation                      | 0.006        |
|         | GO:0071103 | DNA conformation change                     | 0.006        |
|         | GO:0009845 | seed germination                            | 0.006        |
|         | GO:0005983 | starch catabolic process                    | 0.007        |
|         | GO:0006304 | DNA modification                            | 0.007        |
|         | GO:0044728 | DNA methylation or demethylation            | 0.007        |
|         | GO:2001251 | negative regulation of chromosome organi... | 0.007        |
|         | GO:0031047 | gene silencing by RNA                       | 0.007        |
|         | GO:0022603 | regulation of anatomical structure morph... | 0.007        |
|         | GO:0009438 | methylglyoxal metabolic process             | 0.007        |
|         | GO:0016571 | histone methylation                         | 0.007        |
|         | GO:0042182 | ketone catabolic process                    | 0.007        |
|         | GO:0051052 | regulation of DNA metabolic process         | 0.007        |
|         | GO:0051596 | methylglyoxal catabolic process             | 0.007        |
|         | GO:0090627 | plant epidermal cell differentiation        | 0.007        |
|         | GO:0010029 | regulation of seed germination              | 0.008        |

Continued on next page

| GO type | GO ID      | Description                                 | Adj. p-value |
|---------|------------|---------------------------------------------|--------------|
|         | GO:0032504 | multicellular organism reproduction         | 0.008        |
|         | GO:0010629 | negative regulation of gene expression      | 0.008        |
|         | GO:0008064 | regulation of actin polymerization or de... | 0.008        |
|         | GO:0009150 | purine ribonucleotide metabolic process     | 0.008        |
|         | GO:0030832 | regulation of actin filament length         | 0.008        |
|         | GO:0032956 | regulation of actin cytoskeleton organiz... | 0.008        |
|         | GO:0032970 | regulation of actin filament-based proce... | 0.008        |
|         | GO:0110053 | regulation of actin filament organizatio... | 0.008        |
|         | GO:0009642 | response to light intensity                 | 0.008        |
|         | GO:0033692 | cellular polysaccharide biosynthetic pro... | 0.008        |
|         | GO:0051239 | regulation of multicellular organismal p... | 0.008        |
|         | GO:0048588 | developmental cell growth                   | 0.008        |
|         | GO:0009251 | glucan catabolic process                    | 0.009        |
|         | GO:0010212 | response to ionizing radiation              | 0.009        |
|         | GO:0071695 | anatomical structure maturation             | 0.010        |
|         | GO:0044839 | cell cycle G2/M phase transition            | 0.010        |
|         | GO:1905268 | negative regulation of chromatin organiz... | 0.010        |
|         | GO:0009144 | purine nucleoside triphosphate metabolic... | 0.010        |
|         | GO:0009205 | purine ribonucleoside triphosphate metab... | 0.010        |
|         | GO:0051567 | histone H3-K9 methylation                   | 0.011        |
|         | GO:0061647 | histone H3-K9 modification                  | 0.011        |
|         | GO:0018193 | peptidyl-amino acid modification            | 0.011        |
|         | GO:0006207 | 'de novo' pyrimidine nucleobase biosynth... | 0.011        |
|         | GO:1902600 | proton transmembrane transport              | 0.011        |
|         | GO:0090351 | seedling development                        | 0.011        |
|         | GO:0044255 | cellular lipid metabolic process            | 0.011        |
|         | GO:2000113 | negative regulation of cellular macromol... | 0.012        |
|         | GO:0051493 | regulation of cytoskeleton organization     | 0.012        |
|         | GO:1901987 | regulation of cell cycle phase transitio... | 0.012        |
|         | GO:0030041 | actin filament polymerization               | 0.012        |
|         | GO:0030833 | regulation of actin filament polymerizat... | 0.012        |
|         | GO:0098813 | nuclear chromosome segregation              | 0.012        |
|         | GO:0030036 | actin cytoskeleton organization             | 0.012        |
|         | GO:0009199 | ribonucleoside triphosphate metabolic pr... | 0.013        |
|         | GO:0005978 | glycogen biosynthetic process               | 0.013        |
|         | GO:0019318 | hexose metabolic process                    | 0.013        |
|         | GO:0019693 | ribose phosphate metabolic process          | 0.013        |
|         | GO:0046486 | glycerolipid metabolic process              | 0.013        |
|         | GO:1901137 | carbohydrate derivative biosynthetic pro... | 0.013        |
|         | GO:0006650 | glycerophospholipid metabolic process       | 0.014        |
|         | GO:0030029 | actin filament-based process                | 0.014        |
|         | GO:0051302 | regulation of cell division                 | 0.014        |
|         | GO:0010103 | stomatal complex morphogenesis              | 0.014        |
|         | GO:0016441 | posttranscriptional gene silencing          | 0.014        |
|         | GO:0022622 | root system development                     | 0.015        |
|         | GO:1901661 | quinone metabolic process                   | 0.015        |
|         | GO:1901663 | quinone biosynthetic process                | 0.015        |
|         | GO:0007015 | actin filament organization                 | 0.016        |
|         | GO:0051640 | organelle localization                      | 0.016        |

Continued on next page

| GO type | GO ID      | Description                                 | Adj. p-value |
|---------|------------|---------------------------------------------|--------------|
|         | GO:0009124 | nucleoside monophosphate biosynthetic pr... | 0.016        |
|         | GO:1902749 | regulation of cell cycle G2/M phase tran... | 0.017        |
|         | GO:0022406 | membrane docking                            | 0.017        |
|         | GO:0140056 | organelle localization by membrane tethe... | 0.017        |
|         | GO:0090407 | organophosphate biosynthetic process        | 0.017        |
|         | GO:0051273 | beta-glucan metabolic process               | 0.017        |
|         | GO:0048364 | root development                            | 0.017        |
|         | GO:0043647 | inositol phosphate metabolic process        | 0.018        |
|         | GO:0022604 | regulation of cell morphogenesis            | 0.018        |
|         | GO:1902903 | regulation of supramolecular fiber organ... | 0.018        |
|         | GO:0097237 | cellular response to toxic substance        | 0.018        |
|         | GO:0006089 | lactate metabolic process                   | 0.018        |
|         | GO:0009141 | nucleoside triphosphate metabolic proces... | 0.018        |
|         | GO:0009260 | ribonucleotide biosynthetic process         | 0.018        |
|         | GO:0019243 | methylglyoxal catabolic process to D-lac... | 0.018        |
|         | GO:0046390 | ribose phosphate biosynthetic process       | 0.018        |
|         | GO:0061727 | methylglyoxal catabolic process to lacta... | 0.018        |
|         | GO:0009250 | glucan biosynthetic process                 | 0.018        |
|         | GO:0009156 | ribonucleoside monophosphate biosyntheti... | 0.019        |
|         | GO:0051716 | cellular response to stimulus               | 0.019        |
|         | GO:0042180 | cellular ketone metabolic process           | 0.019        |
|         | GO:0055046 | microgametogenesis                          | 0.019        |
|         | GO:0000302 | response to reactive oxygen species         | 0.020        |
|         | GO:0006986 | response to unfolded protein                | 0.020        |
|         | GO:0044770 | cell cycle phase transition                 | 0.020        |
|         | GO:0006458 | 'de novo' protein folding                   | 0.021        |
|         | GO:0019915 | lipid storage                               | 0.021        |
|         | GO:0032535 | regulation of cellular component size       | 0.021        |
|         | GO:0051084 | 'de novo' posttranslational protein fold... | 0.021        |
|         | GO:0090066 | regulation of anatomical structure size     | 0.021        |
|         | GO:0010332 | response to gamma radiation                 | 0.021        |
|         | GO:0048278 | vesicle docking                             | 0.021        |
|         | GO:0006012 | galactose metabolic process                 | 0.021        |
|         | GO:0070828 | heterochromatin organization                | 0.021        |
|         | GO:0009741 | response to brassinosteroid                 | 0.021        |
|         | GO:0090698 | post-embryonic plant morphogenesis          | 0.022        |
|         | GO:0010431 | seed maturation                             | 0.022        |
|         | GO:0031050 | dsRNA fragmentation                         | 0.023        |
|         | GO:0043331 | response to dsRNA                           | 0.023        |
|         | GO:0070918 | production of small RNA involved in gene... | 0.023        |
|         | GO:0071359 | cellular response to dsRNA                  | 0.023        |
|         | GO:0042181 | ketone biosynthetic process                 | 0.024        |
|         | GO:0016246 | RNA interference                            | 0.024        |
|         | GO:0007276 | gamete generation                           | 0.025        |
|         | GO:0034637 | cellular carbohydrate biosynthetic proce... | 0.025        |
|         | GO:0006644 | phospholipid metabolic process              | 0.025        |
|         | GO:0016051 | carbohydrate biosynthetic process           | 0.025        |
|         | GO:0048367 | shoot system development                    | 0.026        |
|         | GO:0006284 | base-excision repair                        | 0.027        |

Continued on next page

| GO type | GO ID      | Description                                 | Adj. p-value |
|---------|------------|---------------------------------------------|--------------|
|         | GO:0009165 | nucleotide biosynthetic process             | 0.027        |
|         | GO:2000026 | regulation of multicellular organismal d... | 0.027        |
|         | GO:1901293 | nucleoside phosphate biosynthetic proces... | 0.028        |
|         | GO:0051094 | positive regulation of developmental pro... | 0.028        |
|         | GO:0006479 | protein methylation                         | 0.029        |
|         | GO:0008213 | protein alkylation                          | 0.029        |
|         | GO:0090558 | plant epidermis development                 | 0.029        |
|         | GO:0009127 | purine nucleoside monophosphate biosynth... | 0.030        |
|         | GO:0009168 | purine ribonucleoside monophosphate bios... | 0.030        |
|         | GO:0000184 | nuclear-transcribed mRNA catabolic proce... | 0.030        |
|         | GO:0030104 | water homeostasis                           | 0.031        |
|         | GO:0010030 | positive regulation of seed germination     | 0.032        |
|         | GO:0044093 | positive regulation of molecular functio... | 0.033        |
|         | GO:1990748 | cellular detoxification                     | 0.034        |
|         | GO:0051085 | chaperone cofactor-dependent protein ref... | 0.036        |
|         | GO:0071214 | cellular response to abiotic stimulus       | 0.037        |
|         | GO:0104004 | cellular response to environmental stimu... | 0.037        |
|         | GO:0048232 | male gamete generation                      | 0.038        |
|         | GO:0009908 | flower development                          | 0.038        |
|         | GO:0006754 | ATP biosynthetic process                    | 0.039        |
|         | GO:0009553 | embryo sac development                      | 0.039        |
|         | GO:0046434 | organophosphate catabolic process           | 0.039        |
|         | GO:0005977 | glycogen metabolic process                  | 0.040        |
|         | GO:0006112 | energy reserve metabolic process            | 0.040        |
|         | GO:1901699 | cellular response to nitrogen compound      | 0.041        |
|         | GO:0019566 | arabinose metabolic process                 | 0.041        |
|         | GO:0042023 | DNA endoreduplication                       | 0.041        |
|         | GO:0098657 | import into cell                            | 0.041        |
|         | GO:0045132 | meiotic chromosome segregation              | 0.042        |
|         | GO:0043085 | positive regulation of catalytic activit... | 0.043        |
|         | GO:0043624 | cellular protein complex disassembly        | 0.043        |
|         | GO:0098869 | cellular oxidant detoxification             | 0.044        |
|         | GO:0030422 | production of siRNA involved in RNA inte... | 0.045        |
|         | GO:0019359 | nicotinamide nucleotide biosynthetic pro... | 0.045        |
|         | GO:0009142 | nucleoside triphosphate biosynthetic pro... | 0.045        |
|         | GO:0009145 | purine nucleoside triphosphate biosynthe... | 0.046        |
|         | GO:0009206 | purine ribonucleoside triphosphate biosy... | 0.046        |
|         | GO:0006206 | pyrimidine nucleobase metabolic process     | 0.047        |
|         | GO:0043244 | regulation of protein complex disassembl... | 0.047        |
|         | GO:0016573 | histone acetylation                         | 0.048        |
|         | GO:0018393 | internal peptidyl-lysine acetylation        | 0.048        |
|         | GO:0018394 | peptidyl-lysine acetylation                 | 0.048        |
|         | GO:0009117 | nucleotide metabolic process                | 0.048        |
|         | GO:0006884 | cell volume homeostasis                     | 0.050        |
|         | GO:0009992 | cellular water homeostasis                  | 0.050        |
|         | GO:0015793 | glycerol transport                          | 0.050        |
|         | GO:0090567 | reproductive shoot system development       | 0.050        |
|         | GO:0030004 | cellular monovalent inorganic cation hom... | 0.052        |
|         | GO:0006970 | response to osmotic stress                  | 0.053        |

Continued on next page

| GO type | GO ID      | Description                                         | Adj. p-value |
|---------|------------|-----------------------------------------------------|--------------|
|         | GO:0044282 | small molecule catabolic process                    | 0.053        |
|         | GO:0009201 | ribonucleoside triphosphate biosynthetic...         | 0.054        |
|         | GO:0048580 | regulation of post-embryonic development            | 0.055        |
|         | GO:0051240 | positive regulation of multicellular org...         | 0.056        |
|         | GO:0042592 | homeostatic process                                 | 0.056        |
|         | GO:0006753 | nucleoside phosphate metabolic process              | 0.056        |
|         | GO:0007267 | cell-cell signaling                                 | 0.056        |
|         | GO:0009415 | response to water                                   | 0.057        |
|         | GO:0010608 | posttranscriptional regulation of gene e...         | 0.057        |
|         | GO:0046165 | alcohol biosynthetic process                        | 0.057        |
|         | GO:0046488 | phosphatidylinositol metabolic process              | 0.058        |
|         | GO:0032271 | regulation of protein polymerization                | 0.059        |
|         | GO:0051274 | beta-glucan biosynthetic process                    | 0.059        |
|         | GO:0009644 | response to high light intensity                    | 0.060        |
|         | GO:0006075 | (1- $\beta$ 3)-beta-D-glucan biosynthetic proces... | 0.061        |
|         | GO:0019363 | pyridine nucleotide biosynthetic process            | 0.061        |
|         | GO:0009225 | nucleotide-sugar metabolic process                  | 0.062        |
|         | GO:0009636 | response to toxic substance                         | 0.062        |
|         | GO:0055082 | cellular chemical homeostasis                       | 0.062        |
|         | GO:0019252 | starch biosynthetic process                         | 0.063        |
|         | GO:0006801 | superoxide metabolic process                        | 0.063        |
|         | GO:0015791 | polyol transport                                    | 0.064        |
|         | GO:0051258 | protein polymerization                              | 0.065        |
|         | GO:0048443 | stamen development                                  | 0.065        |
|         | GO:0048466 | androecium development                              | 0.065        |
|         | GO:0048825 | cotyledon development                               | 0.065        |
|         | GO:0048827 | phyllome development                                | 0.068        |
|         | GO:0006631 | fatty acid metabolic process                        | 0.068        |
|         | GO:0010162 | seed dormancy process                               | 0.069        |
|         | GO:0022611 | dormancy process                                    | 0.069        |
|         | GO:0006743 | ubiquinone metabolic process                        | 0.069        |
|         | GO:0006744 | ubiquinone biosynthetic process                     | 0.069        |
|         | GO:0070192 | chromosome organization involved in meio...         | 0.069        |
|         | GO:0006475 | internal protein amino acid acetylation             | 0.069        |
|         | GO:0032875 | regulation of DNA endoreduplication                 | 0.070        |
|         | GO:0009414 | response to water deprivation                       | 0.073        |
|         | GO:1901135 | carbohydrate derivative metabolic proces...         | 0.073        |
|         | GO:0006006 | glucose metabolic process                           | 0.073        |
|         | GO:0051701 | interaction with host                               | 0.073        |
|         | GO:0006733 | oxidoreduction coenzyme metabolic proces...         | 0.074        |
|         | GO:0010090 | trichome morphogenesis                              | 0.074        |
|         | GO:0030838 | positive regulation of actin filament po...         | 0.077        |
|         | GO:0045010 | actin nucleation                                    | 0.077        |
|         | GO:0016071 | mRNA metabolic process                              | 0.079        |
|         | GO:0006979 | response to oxidative stress                        | 0.079        |
|         | GO:0018208 | peptidyl-proline modification                       | 0.079        |
|         | GO:0046854 | phosphatidylinositol phosphorylation                | 0.079        |
|         | GO:0045892 | negative regulation of transcription, DN...         | 0.080        |
|         | GO:0048598 | embryonic morphogenesis                             | 0.080        |

Continued on next page

| GO type | GO ID      | Description                                   | Adj. p-value |
|---------|------------|-----------------------------------------------|--------------|
|         | GO:0008361 | regulation of cell size                       | 0.083        |
|         | GO:0017148 | negative regulation of translation            | 0.083        |
|         | GO:0031060 | regulation of histone methylation             | 0.083        |
|         | GO:0006950 | response to stress                            | 0.083        |
|         | GO:0009904 | chloroplast accumulation movement             | 0.084        |
|         | GO:0006074 | (1- $\beta$ )-beta-D-glucan metabolic process | 0.084        |
|         | GO:0010558 | negative regulation of macromolecule bio...   | 0.085        |
|         | GO:0010638 | positive regulation of organelle organiz...   | 0.089        |
|         | GO:0008360 | regulation of cell shape                      | 0.089        |
|         | GO:0010948 | negative regulation of cell cycle proces...   | 0.089        |
|         | GO:0015672 | monovalent inorganic cation transport         | 0.089        |
|         | GO:0009934 | regulation of meristem structural organi...   | 0.089        |
|         | GO:1903311 | regulation of mRNA metabolic process          | 0.091        |
|         | GO:0031338 | regulation of vesicle fusion                  | 0.092        |
|         | GO:0072528 | pyrimidine-containing compound biosynthe...   | 0.092        |
|         | GO:0048437 | floral organ development                      | 0.095        |
|         | GO:0009166 | nucleotide catabolic process                  | 0.096        |
|         | GO:1901700 | response to oxygen-containing compound        | 0.097        |
|         | GO:0010035 | response to inorganic substance               | 0.099        |
|         | GO:0048438 | floral whorl development                      | 0.099        |
|         | GO:0009629 | response to gravity                           | 0.100        |
|         | GO:0035966 | response to topologically incorrect prot...   | 0.100        |
|         | GO:0044430 | cytoskeletal part                             | 0.000        |
|         | GO:0044444 | cytoplasmic part                              | 0.000        |
|         | GO:0044427 | chromosomal part                              | 0.000        |
|         | GO:0005794 | Golgi apparatus                               | 0.000        |
|         | GO:0005819 | spindle                                       | 0.000        |
|         | GO:0033176 | proton-transporting V-type ATPase comple...   | 0.000        |
|         | GO:0009507 | chloroplast                                   | 0.001        |
|         | GO:0012505 | endomembrane system                           | 0.001        |
|         | GO:0000139 | Golgi membrane                                | 0.001        |
|         | GO:0044454 | nuclear chromosome part                       | 0.001        |
|         | GO:0009524 | phragmoplast                                  | 0.001        |
|         | GO:0000228 | nuclear chromosome                            | 0.001        |
|         | GO:0098687 | chromosomal region                            | 0.001        |
|         | GO:0098588 | bounding membrane of organelle                | 0.002        |
|         | GO:0009526 | plastid envelope                              | 0.002        |
|         | GO:0009941 | chloroplast envelope                          | 0.003        |
|         | GO:0031090 | organelle membrane                            | 0.005        |
|         | GO:0048046 | apoplast                                      | 0.007        |
|         | GO:0000784 | nuclear chromosome, telomeric region          | 0.007        |
|         | GO:0042170 | plastid membrane                              | 0.007        |
|         | GO:0033178 | proton-transporting two-sector ATPase co...   | 0.010        |
|         | GO:0031969 | chloroplast membrane                          | 0.011        |
|         | GO:0044435 | plastid part                                  | 0.013        |
|         | GO:0005811 | lipid droplet                                 | 0.013        |
|         | GO:0031982 | vesicle                                       | 0.014        |
|         | GO:0031984 | organelle subcompartment                      | 0.021        |
|         | GO:0000781 | chromosome, telomeric region                  | 0.021        |

Continued on next page

| GO type | GO ID      | Description                                 | Adj. p-value |
|---------|------------|---------------------------------------------|--------------|
|         | GO:0044434 | chloroplast part                            | 0.022        |
|         | GO:0030659 | cytoplasmic vesicle membrane                | 0.022        |
|         | GO:0005802 | trans-Golgi network                         | 0.023        |
|         | GO:0019867 | outer membrane                              | 0.029        |
|         | GO:0044437 | vacuolar part                               | 0.029        |
|         | GO:0009705 | plant-type vacuole membrane                 | 0.030        |
|         | GO:0097708 | intracellular vesicle                       | 0.031        |
|         | GO:0030662 | coated vesicle membrane                     | 0.033        |
|         | GO:0031410 | cytoplasmic vesicle                         | 0.034        |
|         | GO:0000782 | telomere cap complex                        | 0.035        |
|         | GO:0000783 | nuclear telomere cap complex                | 0.035        |
|         | GO:0005774 | vacuolar membrane                           | 0.035        |
|         | GO:0005881 | cytoplasmic microtubule                     | 0.035        |
|         | GO:0012506 | vesicle membrane                            | 0.035        |
|         | GO:0016469 | proton-transporting two-sector ATPase co... | 0.035        |
|         | GO:0044433 | cytoplasmic vesicle part                    | 0.035        |
|         | GO:0000325 | plant-type vacuole                          | 0.036        |
|         | GO:0005773 | vacuole                                     | 0.038        |
|         | GO:0009506 | plasmodesma                                 | 0.038        |
|         | GO:0055044 | symplast                                    | 0.038        |
|         | GO:0015629 | actin cytoskeleton                          | 0.045        |
|         | GO:0000790 | nuclear chromatin                           | 0.046        |
|         | GO:0000148 | 1,3-beta-D-glucan synthase complex          | 0.047        |
|         | GO:0030120 | vesicle coat                                | 0.048        |
|         | GO:0098805 | whole membrane                              | 0.048        |
|         | GO:0009504 | cell plate                                  | 0.051        |
|         | GO:0016459 | myosin complex                              | 0.051        |
|         | GO:0055028 | cortical microtubule                        | 0.053        |
|         | GO:0005657 | replication fork                            | 0.057        |
|         | GO:0030863 | cortical cytoskeleton                       | 0.057        |
|         | GO:0030981 | cortical microtubule cytoskeleton           | 0.057        |
|         | GO:0030133 | transport vesicle                           | 0.057        |
|         | GO:0031968 | organelle outer membrane                    | 0.060        |
|         | GO:0009528 | plastid inner membrane                      | 0.070        |
|         | GO:0030658 | transport vesicle membrane                  | 0.070        |
|         | GO:0042646 | plastid nucleoid                            | 0.072        |
|         | GO:0042575 | DNA polymerase complex                      | 0.089        |
|         | GO:0030660 | Golgi-associated vesicle membrane           | 0.089        |
|         | GO:0005768 | endosome                                    | 0.099        |
|         | GO:0009706 | chloroplast inner membrane                  | 0.099        |
|         | GO:0009707 | chloroplast outer membrane                  | 0.100        |
|         | GO:0003774 | motor activity                              | 0.000        |
|         | GO:0017111 | nucleoside-triphosphatase activity          | 0.000        |
|         | GO:0004553 | hydrolase activity, hydrolyzing O-glycos... | 0.000        |
|         | GO:0005515 | protein binding                             | 0.000        |
|         | GO:0004386 | helicase activity                           | 0.000        |
|         | GO:0003678 | DNA helicase activity                       | 0.000        |
|         | GO:0019783 | ubiquitin-like protein-specific protease... | 0.001        |
|         | GO:0016278 | lysine N-methyltransferase activity         | 0.003        |

Continued on next page



| GO type | GO ID      | Description                                 | Adj. p-value |
|---------|------------|---------------------------------------------|--------------|
|         | GO:0016279 | protein-lysine N-methyltransferase activ... | 0.003        |
|         | GO:0005524 | ATP binding                                 | 0.003        |
|         | GO:0008270 | zinc ion binding                            | 0.004        |
|         | GO:0008574 | ATP-dependent microtubule motor activity... | 0.004        |
|         | GO:1990939 | ATP-dependent microtubule motor activity    | 0.004        |
|         | GO:0036442 | proton-exporting ATPase activity            | 0.004        |
|         | GO:0016407 | acetyltransferase activity                  | 0.005        |
|         | GO:0008144 | drug binding                                | 0.006        |
|         | GO:0042054 | histone methyltransferase activity          | 0.009        |
|         | GO:0042623 | ATPase activity, coupled                    | 0.010        |
|         | GO:0016307 | phosphatidylinositol phosphate kinase ac... | 0.010        |
|         | GO:0036094 | small molecule binding                      | 0.012        |
|         | GO:0015925 | galactosidase activity                      | 0.015        |
|         | GO:0030554 | adenyl nucleotide binding                   | 0.015        |
|         | GO:0000166 | nucleotide binding                          | 0.015        |
|         | GO:0005488 | binding                                     | 0.015        |
|         | GO:0008170 | N-methyltransferase activity                | 0.015        |
|         | GO:0015923 | mannosidase activity                        | 0.015        |
|         | GO:0036459 | thiol-dependent ubiquitinyl hydrolase ac... | 0.015        |
|         | GO:0101005 | ubiquitinyl hydrolase activity              | 0.015        |
|         | GO:1901265 | nucleoside phosphate binding                | 0.015        |
|         | GO:0008094 | DNA-dependent ATPase activity               | 0.016        |
|         | GO:0004567 | beta-mannosidase activity                   | 0.016        |
|         | GO:0003824 | catalytic activity                          | 0.017        |
|         | GO:0003954 | NADH dehydrogenase activity                 | 0.017        |
|         | GO:0015926 | glucosidase activity                        | 0.017        |
|         | GO:0032559 | adenyl ribonucleotide binding               | 0.017        |
|         | GO:0035639 | purine ribonucleoside triphosphate bindi... | 0.017        |
|         | GO:0044769 | ATPase activity, coupled to transmembran... | 0.017        |
|         | GO:0046961 | proton-transporting ATPase activity, rot... | 0.017        |
|         | GO:0051082 | unfolded protein binding                    | 0.018        |
|         | GO:0046556 | alpha-L-arabinofuranosidase activity        | 0.019        |
|         | GO:0008276 | protein methyltransferase activity          | 0.020        |
|         | GO:0008026 | ATP-dependent helicase activity             | 0.021        |
|         | GO:0070035 | purine NTP-dependent helicase activity      | 0.021        |
|         | GO:0004003 | ATP-dependent DNA helicase activity         | 0.022        |
|         | GO:0008047 | enzyme activator activity                   | 0.022        |
|         | GO:0043168 | anion binding                               | 0.022        |
|         | GO:0008289 | lipid binding                               | 0.025        |
|         | GO:0017076 | purine nucleotide binding                   | 0.035        |
|         | GO:0050661 | NADP binding                                | 0.036        |
|         | GO:0008168 | methyltransferase activity                  | 0.039        |
|         | GO:0060589 | nucleoside-triphosphatase regulator acti... | 0.039        |
|         | GO:0019829 | cation-transporting ATPase activity         | 0.045        |
|         | GO:0022853 | active ion transmembrane transporter act... | 0.045        |
|         | GO:0042625 | ATPase coupled ion transmembrane transpo... | 0.045        |
|         | GO:0016209 | antioxidant activity                        | 0.046        |
|         | GO:0043167 | ion binding                                 | 0.046        |
|         | GO:0032555 | purine ribonucleotide binding               | 0.046        |

Continued on next page

| GO type | GO ID      | Description                                 | Adj. p-value |
|---------|------------|---------------------------------------------|--------------|
|         | GO:0097367 | carbohydrate derivative binding             | 0.052        |
|         | GO:2001070 | starch binding                              | 0.053        |
|         | GO:0008757 | S-adenosylmethionine-dependent methyltra... | 0.056        |
|         | GO:0005527 | macrolide binding                           | 0.062        |
|         | GO:0005528 | FK506 binding                               | 0.062        |
|         | GO:0016903 | oxidoreductase activity, acting on the a... | 0.072        |
|         | GO:0005372 | water transmembrane transporter activity    | 0.074        |
|         | GO:0015250 | water channel activity                      | 0.074        |
|         | GO:0015254 | glycerol channel activity                   | 0.074        |
|         | GO:0032553 | ribonucleotide binding                      | 0.075        |
|         | GO:0042393 | histone binding                             | 0.075        |
|         | GO:0019200 | carbohydrate kinase activity                | 0.076        |
|         | GO:0042803 | protein homodimerization activity           | 0.080        |
|         | GO:0008422 | beta-glucosidase activity                   | 0.082        |
|         | GO:0004650 | polygalacturonase activity                  | 0.084        |
|         | GO:0003682 | chromatin binding                           | 0.085        |
|         | GO:0003843 | 1,3-beta-D-glucan synthase activity         | 0.085        |
|         | GO:0004176 | ATP-dependent peptidase activity            | 0.085        |
|         | GO:0042162 | telomeric DNA binding                       | 0.085        |
|         | GO:0043621 | protein self-association                    | 0.085        |
|         | GO:0015085 | calcium ion transmembrane transporter ac... | 0.089        |
|         | GO:0016741 | transferase activity, transferring one-c... | 0.089        |
|         | GO:0016788 | hydrolase activity, acting on ester bond... | 0.090        |
|         | GO:0035091 | phosphatidylinositol binding                | 0.090        |
|         | GO:0016620 | oxidoreductase activity, acting on the a... | 0.092        |
|         | GO:0004565 | beta-galactosidase activity                 | 0.094        |
|         | GO:0070569 | uridylyltransferase activity                | 0.094        |
|         | GO:0015168 | glycerol transmembrane transporter activ... | 0.095        |

#### 4.3.16 Root - Preflowering - Cluster 16

| GO type | GO ID      | Description                                 | Adj. p-value |
|---------|------------|---------------------------------------------|--------------|
|         | GO:0006259 | DNA metabolic process                       | 0.000        |
|         | GO:0034660 | ncRNA metabolic process                     | 0.000        |
|         | GO:0043414 | macromolecule methylation                   | 0.000        |
|         | GO:0009451 | RNA modification                            | 0.000        |
|         | GO:0040029 | regulation of gene expression, epigeneti... | 0.000        |
|         | GO:0003006 | developmental process involved in reprod... | 0.000        |
|         | GO:0009791 | post-embryonic development                  | 0.000        |
|         | GO:0009657 | plastid organization                        | 0.000        |
|         | GO:0016569 | covalent chromatin modification             | 0.000        |
|         | GO:0016570 | histone modification                        | 0.000        |
|         | GO:0022613 | ribonucleoprotein complex biogenesis        | 0.000        |
|         | GO:0006310 | DNA recombination                           | 0.000        |
|         | GO:0031047 | gene silencing by RNA                       | 0.000        |
|         | GO:2000113 | negative regulation of cellular macromol... | 0.000        |
|         | GO:0018022 | peptidyl-lysine methylation                 | 0.000        |
|         | GO:0035194 | posttranscriptional gene silencing by RN... | 0.000        |
|         | GO:0006304 | DNA modification                            | 0.000        |
|         | GO:0044728 | DNA methylation or demethylation            | 0.000        |
|         | GO:0051239 | regulation of multicellular organismal p... | 0.000        |
|         | GO:0010154 | fruit development                           | 0.000        |
|         | GO:0033043 | regulation of organelle organization        | 0.000        |
|         | GO:0006401 | RNA catabolic process                       | 0.000        |
|         | GO:0051052 | regulation of DNA metabolic process         | 0.000        |
|         | GO:0048580 | regulation of post-embryonic development    | 0.000        |
|         | GO:0090501 | RNA phosphodiester bond hydrolysis          | 0.000        |
|         | GO:0006306 | DNA methylation                             | 0.000        |
|         | GO:0005982 | starch metabolic process                    | 0.000        |
|         | GO:0034249 | negative regulation of cellular amide me... | 0.000        |
|         | GO:0016246 | RNA interference                            | 0.000        |
|         | GO:0006417 | regulation of translation                   | 0.000        |
|         | GO:0017148 | negative regulation of translation          | 0.000        |
|         | GO:0006400 | tRNA modification                           | 0.000        |
|         | GO:0007049 | cell cycle                                  | 0.000        |
|         | GO:0006302 | double-strand break repair                  | 0.000        |
|         | GO:0045892 | negative regulation of transcription, DN... | 0.000        |
|         | GO:0071478 | cellular response to radiation              | 0.000        |
|         | GO:0035196 | production of miRNAs involved in gene si... | 0.000        |
|         | GO:0006260 | DNA replication                             | 0.000        |
|         | GO:0045814 | negative regulation of gene expression, ... | 0.000        |
|         | GO:0048518 | positive regulation of biological proces... | 0.000        |
|         | GO:0006402 | mRNA catabolic process                      | 0.000        |
|         | GO:0009642 | response to light intensity                 | 0.000        |
|         | GO:0007033 | vacuole organization                        | 0.000        |
|         | GO:0016556 | mRNA modification                           | 0.000        |
|         | GO:0070192 | chromosome organization involved in meio... | 0.000        |
|         | GO:2000241 | regulation of reproductive process          | 0.000        |

Continued on next page

| GO type | GO ID      | Description                                 | Adj. p-value |
|---------|------------|---------------------------------------------|--------------|
|         | GO:1903311 | regulation of mRNA metabolic process        | 0.001        |
|         | GO:0048831 | regulation of shoot system development      | 0.001        |
|         | GO:0006342 | chromatin silencing                         | 0.001        |
|         | GO:0006886 | intracellular protein transport             | 0.001        |
|         | GO:0005977 | glycogen metabolic process                  | 0.001        |
|         | GO:0006112 | energy reserve metabolic process            | 0.001        |
|         | GO:0009416 | response to light stimulus                  | 0.001        |
|         | GO:0009893 | positive regulation of metabolic process    | 0.001        |
|         | GO:0051253 | negative regulation of RNA metabolic pro... | 0.001        |
|         | GO:0071482 | cellular response to light stimulus         | 0.001        |
|         | GO:0010468 | regulation of gene expression               | 0.001        |
|         | GO:0031056 | regulation of histone modification          | 0.001        |
|         | GO:0006312 | mitotic recombination                       | 0.001        |
|         | GO:0006261 | DNA-dependent DNA replication               | 0.001        |
|         | GO:0043484 | regulation of RNA splicing                  | 0.002        |
|         | GO:0009908 | flower development                          | 0.002        |
|         | GO:0019252 | starch biosynthetic process                 | 0.002        |
|         | GO:0009909 | regulation of flower development            | 0.002        |
|         | GO:0044260 | cellular macromolecule metabolic process    | 0.002        |
|         | GO:1902679 | negative regulation of RNA biosynthetic ... | 0.002        |
|         | GO:1903507 | negative regulation of nucleic acid-temp... | 0.002        |
|         | GO:0006289 | nucleotide-excision repair                  | 0.002        |
|         | GO:0045132 | meiotic chromosome segregation              | 0.002        |
|         | GO:0009668 | plastid membrane organization               | 0.003        |
|         | GO:0010027 | thylakoid membrane organization             | 0.003        |
|         | GO:0046907 | intracellular transport                     | 0.003        |
|         | GO:0098813 | nuclear chromosome segregation              | 0.003        |
|         | GO:0000245 | spliceosomal complex assembly               | 0.003        |
|         | GO:0009845 | seed germination                            | 0.003        |
|         | GO:0051649 | establishment of localization in cell       | 0.003        |
|         | GO:0010604 | positive regulation of macromolecule met... | 0.003        |
|         | GO:0071407 | cellular response to organic cyclic comp... | 0.003        |
|         | GO:0045036 | protein targeting to chloroplast            | 0.003        |
|         | GO:0072596 | establishment of protein localization to... | 0.003        |
|         | GO:0048609 | multicellular organismal reproductive pr... | 0.003        |
|         | GO:0071704 | organic substance metabolic process         | 0.003        |
|         | GO:0050684 | regulation of mRNA processing               | 0.004        |
|         | GO:0000956 | nuclear-transcribed mRNA catabolic proce... | 0.004        |
|         | GO:0090502 | RNA phosphodiester bond hydrolysis, endo... | 0.004        |
|         | GO:0005978 | glycogen biosynthetic process               | 0.004        |
|         | GO:0051567 | histone H3-K9 methylation                   | 0.005        |
|         | GO:0061647 | histone H3-K9 modification                  | 0.005        |
|         | GO:0090351 | seedling development                        | 0.005        |
|         | GO:0090567 | reproductive shoot system development       | 0.005        |
|         | GO:0072598 | protein localization to chloroplast         | 0.005        |
|         | GO:0006366 | transcription by RNA polymerase II          | 0.005        |
|         | GO:0048522 | positive regulation of cellular process     | 0.006        |
|         | GO:0006273 | lagging strand elongation                   | 0.006        |
|         | GO:0033993 | response to lipid                           | 0.006        |

Continued on next page

| GO type | GO ID      | Description                                 | Adj. p-value |
|---------|------------|---------------------------------------------|--------------|
|         | GO:0045143 | homologous chromosome segregation           | 0.006        |
|         | GO:0005983 | starch catabolic process                    | 0.006        |
|         | GO:0030488 | tRNA methylation                            | 0.006        |
|         | GO:0031325 | positive regulation of cellular metaboli... | 0.006        |
|         | GO:0051168 | nuclear export                              | 0.006        |
|         | GO:0006611 | protein export from nucleus                 | 0.007        |
|         | GO:0043038 | amino acid activation                       | 0.007        |
|         | GO:0043039 | tRNA aminoacylation                         | 0.007        |
|         | GO:0044030 | regulation of DNA methylation               | 0.008        |
|         | GO:0032270 | positive regulation of cellular protein ... | 0.008        |
|         | GO:0006284 | base-excision repair                        | 0.008        |
|         | GO:0097305 | response to alcohol                         | 0.008        |
|         | GO:0006376 | mRNA splice site selection                  | 0.009        |
|         | GO:0006950 | response to stress                          | 0.009        |
|         | GO:0042752 | regulation of circadian rhythm              | 0.009        |
|         | GO:0071897 | DNA biosynthetic process                    | 0.009        |
|         | GO:0007129 | synapsis                                    | 0.010        |
|         | GO:0051173 | positive regulation of nitrogen compound... | 0.010        |
|         | GO:0008104 | protein localization                        | 0.010        |
|         | GO:0006338 | chromatin remodeling                        | 0.010        |
|         | GO:0006378 | mRNA polyadenylation                        | 0.010        |
|         | GO:0006418 | tRNA aminoacylation for protein translat... | 0.010        |
|         | GO:0009910 | negative regulation of flower developmen... | 0.011        |
|         | GO:2000242 | negative regulation of reproductive proc... | 0.011        |
|         | GO:0006379 | mRNA cleavage                               | 0.011        |
|         | GO:0000725 | recombinational repair                      | 0.012        |
|         | GO:0009737 | response to abscisic acid                   | 0.012        |
|         | GO:0051247 | positive regulation of protein metabolic... | 0.012        |
|         | GO:0006403 | RNA localization                            | 0.012        |
|         | GO:0045184 | establishment of protein localization       | 0.012        |
|         | GO:0071826 | ribonucleoprotein complex subunit organi... | 0.012        |
|         | GO:0000045 | autophagosome assembly                      | 0.013        |
|         | GO:1905037 | autophagosome organization                  | 0.013        |
|         | GO:0043572 | plastid fission                             | 0.013        |
|         | GO:0043631 | RNA polyadenylation                         | 0.013        |
|         | GO:0016236 | macroautophagy                              | 0.013        |
|         | GO:0015031 | protein transport                           | 0.014        |
|         | GO:0048232 | male gamete generation                      | 0.015        |
|         | GO:0031323 | regulation of cellular metabolic process    | 0.015        |
|         | GO:0000959 | mitochondrial RNA metabolic process         | 0.015        |
|         | GO:0000724 | double-strand break repair via homologou... | 0.015        |
|         | GO:0006405 | RNA export from nucleus                     | 0.015        |
|         | GO:0009615 | response to virus                           | 0.015        |
|         | GO:0010267 | production of ta-siRNAs involved in RNA ... | 0.016        |
|         | GO:0006265 | DNA topological change                      | 0.016        |
|         | GO:0031401 | positive regulation of protein modificat... | 0.016        |
|         | GO:0031123 | RNA 3'-end processing                       | 0.017        |
|         | GO:0050657 | nucleic acid transport                      | 0.017        |
|         | GO:0050658 | RNA transport                               | 0.017        |

Continued on next page

| GO type | GO ID      | Description                                 | Adj. p-value |
|---------|------------|---------------------------------------------|--------------|
|         | GO:0051236 | establishment of RNA localization           | 0.017        |
|         | GO:0010020 | chloroplast fission                         | 0.017        |
|         | GO:0031053 | primary miRNA processing                    | 0.018        |
|         | GO:0006913 | nucleocytoplasmic transport                 | 0.018        |
|         | GO:0051169 | nuclear transport                           | 0.018        |
|         | GO:0051094 | positive regulation of developmental pro... | 0.019        |
|         | GO:0071166 | ribonucleoprotein complex localization      | 0.019        |
|         | GO:0071426 | ribonucleoprotein complex export from nu... | 0.019        |
|         | GO:0006271 | DNA strand elongation involved in DNA re... | 0.019        |
|         | GO:0022616 | DNA strand elongation                       | 0.019        |
|         | GO:0048583 | regulation of response to stimulus          | 0.019        |
|         | GO:0031124 | mRNA 3'-end processing                      | 0.022        |
|         | GO:0048581 | negative regulation of post-embryonic de... | 0.023        |
|         | GO:0006352 | DNA-templated transcription, initiation     | 0.023        |
|         | GO:0032544 | plastid translation                         | 0.024        |
|         | GO:0045037 | protein import into chloroplast stroma      | 0.024        |
|         | GO:0007018 | microtubule-based movement                  | 0.025        |
|         | GO:0030258 | lipid modification                          | 0.025        |
|         | GO:0000380 | alternative mRNA splicing, via spliceoso... | 0.026        |
|         | GO:0031627 | telomeric loop formation                    | 0.028        |
|         | GO:0048582 | positive regulation of post-embryonic de... | 0.028        |
|         | GO:0051171 | regulation of nitrogen compound metaboli... | 0.028        |
|         | GO:0060147 | regulation of posttranscriptional gene s... | 0.029        |
|         | GO:0032392 | DNA geometric change                        | 0.030        |
|         | GO:0032508 | DNA duplex unwinding                        | 0.030        |
|         | GO:0050789 | regulation of biological process            | 0.030        |
|         | GO:0070828 | heterochromatin organization                | 0.030        |
|         | GO:0051053 | negative regulation of DNA metabolic pro... | 0.031        |
|         | GO:0080090 | regulation of primary metabolic process     | 0.031        |
|         | GO:0000460 | maturation of 5.8S rRNA                     | 0.031        |
|         | GO:0033036 | macromolecule localization                  | 0.031        |
|         | GO:0051026 | chiasma assembly                            | 0.031        |
|         | GO:0009414 | response to water deprivation               | 0.032        |
|         | GO:0080188 | RNA-directed DNA methylation                | 0.032        |
|         | GO:0031338 | regulation of vesicle fusion                | 0.033        |
|         | GO:0009415 | response to water                           | 0.035        |
|         | GO:0022618 | ribonucleoprotein complex assembly          | 0.035        |
|         | GO:2001020 | regulation of response to DNA damage sti... | 0.035        |
|         | GO:0098586 | cellular response to virus                  | 0.035        |
|         | GO:0015833 | peptide transport                           | 0.036        |
|         | GO:0046185 | aldehyde catabolic process                  | 0.036        |
|         | GO:0070816 | phosphorylation of RNA polymerase II C-t... | 0.036        |
|         | GO:0042886 | amide transport                             | 0.037        |
|         | GO:0031399 | regulation of protein modification proce... | 0.037        |
|         | GO:0009438 | methylglyoxal metabolic process             | 0.037        |
|         | GO:0042182 | ketone catabolic process                    | 0.037        |
|         | GO:0051596 | methylglyoxal catabolic process             | 0.037        |
|         | GO:0043933 | protein-containing complex subunit organ... | 0.038        |
|         | GO:0017038 | protein import                              | 0.039        |

Continued on next page

| GO type | GO ID      | Description                                 | Adj. p-value |
|---------|------------|---------------------------------------------|--------------|
|         | GO:0031503 | protein-containing complex localization     | 0.039        |
|         | GO:0051640 | organelle localization                      | 0.039        |
|         | GO:0051240 | positive regulation of multicellular org... | 0.040        |
|         | GO:1901700 | response to oxygen-containing compound      | 0.040        |
|         | GO:0031058 | positive regulation of histone modificat... | 0.040        |
|         | GO:2001252 | positive regulation of chromosome organi... | 0.043        |
|         | GO:0061024 | membrane organization                       | 0.044        |
|         | GO:0009743 | response to carbohydrate                    | 0.045        |
|         | GO:0071103 | DNA conformation change                     | 0.046        |
|         | GO:0006089 | lactate metabolic process                   | 0.046        |
|         | GO:0019243 | methylglyoxal catabolic process to D-lac... | 0.046        |
|         | GO:0061727 | methylglyoxal catabolic process to lacta... | 0.046        |
|         | GO:0007062 | sister chromatid cohesion                   | 0.047        |
|         | GO:0051248 | negative regulation of protein metabolic... | 0.047        |
|         | GO:0051130 | positive regulation of cellular componen... | 0.051        |
|         | GO:0009894 | regulation of catabolic process             | 0.051        |
|         | GO:0006928 | movement of cell or subcellular componen... | 0.051        |
|         | GO:0031329 | regulation of cellular catabolic process    | 0.055        |
|         | GO:0009637 | response to blue light                      | 0.056        |
|         | GO:0009630 | gravitropism                                | 0.057        |
|         | GO:0035601 | protein deacylation                         | 0.057        |
|         | GO:0006476 | protein deacetylation                       | 0.058        |
|         | GO:0006406 | mRNA export from nucleus                    | 0.059        |
|         | GO:0071427 | mRNA-containing ribonucleoprotein comple... | 0.059        |
|         | GO:0090503 | RNA phosphodiester bond hydrolysis, exon... | 0.060        |
|         | GO:0009581 | detection of external stimulus              | 0.062        |
|         | GO:0009582 | detection of abiotic stimulus               | 0.062        |
|         | GO:0009911 | positive regulation of flower developmen... | 0.062        |
|         | GO:0032269 | negative regulation of cellular protein ... | 0.064        |
|         | GO:0000160 | phosphorelay signal transduction system     | 0.066        |
|         | GO:0016973 | poly(A)+ mRNA export from nucleus           | 0.066        |
|         | GO:0006904 | vesicle docking involved in exocytosis      | 0.069        |
|         | GO:0140029 | exocytic process                            | 0.069        |
|         | GO:0048229 | gametophyte development                     | 0.072        |
|         | GO:0009787 | regulation of abscisic acid-activated si... | 0.073        |
|         | GO:1901419 | regulation of response to alcohol           | 0.073        |
|         | GO:1905957 | regulation of cellular response to alcoh... | 0.073        |
|         | GO:0043085 | positive regulation of catalytic activit... | 0.073        |
|         | GO:1905269 | positive regulation of chromatin organiz... | 0.077        |
|         | GO:0000478 | endonucleolytic cleavage involved in rRN... | 0.078        |
|         | GO:0044093 | positive regulation of molecular functio... | 0.080        |
|         | GO:0010431 | seed maturation                             | 0.080        |
|         | GO:0008284 | positive regulation of cell proliferatio... | 0.080        |
|         | GO:0019953 | sexual reproduction                         | 0.080        |
|         | GO:0014070 | response to organic cyclic compound         | 0.080        |
|         | GO:0000469 | cleavage involved in rRNA processing        | 0.085        |
|         | GO:0032436 | positive regulation of proteasomal ubiqu... | 0.085        |
|         | GO:2000060 | positive regulation of ubiquitin-depende... | 0.085        |
|         | GO:0006383 | transcription by RNA polymerase III         | 0.089        |

Continued on next page

| GO type | GO ID      | Description                                 | Adj. p-value |
|---------|------------|---------------------------------------------|--------------|
|         | GO:0007389 | pattern specification process               | 0.089        |
|         | GO:0006914 | autophagy                                   | 0.097        |
|         | GO:0061919 | process utilizing autophagic mechanism      | 0.097        |
|         | GO:0071806 | protein transmembrane transport             | 0.097        |
|         | GO:0009553 | embryo sac development                      | 0.098        |
|         | GO:0071489 | cellular response to red or far red ligh... | 0.099        |
|         | GO:0044428 | nuclear part                                | 0.000        |
|         | GO:0044435 | plastid part                                | 0.000        |
|         | GO:0005654 | nucleoplasm                                 | 0.000        |
|         | GO:0044451 | nucleoplasm part                            | 0.000        |
|         | GO:0005737 | cytoplasm                                   | 0.000        |
|         | GO:0009526 | plastid envelope                            | 0.000        |
|         | GO:0000151 | ubiquitin ligase complex                    | 0.000        |
|         | GO:0031461 | cullin-RING ubiquitin ligase complex        | 0.000        |
|         | GO:0005694 | chromosome                                  | 0.000        |
|         | GO:0009532 | plastid stroma                              | 0.000        |
|         | GO:0005681 | spliceosomal complex                        | 0.000        |
|         | GO:0061695 | transferase complex, transferring phosph... | 0.000        |
|         | GO:0016604 | nuclear body                                | 0.000        |
|         | GO:0042646 | plastid nucleoid                            | 0.000        |
|         | GO:0009295 | nucleoid                                    | 0.000        |
|         | GO:0042170 | plastid membrane                            | 0.000        |
|         | GO:0000428 | DNA-directed RNA polymerase complex         | 0.000        |
|         | GO:0030880 | RNA polymerase complex                      | 0.000        |
|         | GO:0042651 | thylakoid membrane                          | 0.000        |
|         | GO:0005684 | U2-type spliceosomal complex                | 0.000        |
|         | GO:0030684 | preribosome                                 | 0.001        |
|         | GO:0031248 | protein acetyltransferase complex           | 0.001        |
|         | GO:1902493 | acetyltransferase complex                   | 0.001        |
|         | GO:0000794 | condensed nuclear chromosome                | 0.001        |
|         | GO:0016607 | nuclear speck                               | 0.001        |
|         | GO:0000229 | cytoplasmic chromosome                      | 0.002        |
|         | GO:0030686 | 90S preribosome                             | 0.002        |
|         | GO:0030532 | small nuclear ribonucleoprotein complex     | 0.002        |
|         | GO:0071004 | U2-type prespliceosome                      | 0.002        |
|         | GO:0071010 | prespliceosome                              | 0.002        |
|         | GO:0097525 | spliceosomal snRNP complex                  | 0.002        |
|         | GO:0120114 | Sm-like protein family complex              | 0.002        |
|         | GO:0000793 | condensed chromosome                        | 0.002        |
|         | GO:0005643 | nuclear pore                                | 0.002        |
|         | GO:0032991 | protein-containing complex                  | 0.002        |
| CC      | GO:0009508 | plastid chromosome                          | 0.003        |
|         | GO:0032040 | small-subunit processome                    | 0.006        |
|         | GO:0043228 | non-membrane-bounded organelle              | 0.006        |
|         | GO:0043232 | intracellular non-membrane-bounded organ... | 0.006        |
|         | GO:0044798 | nuclear transcription factor complex        | 0.006        |
|         | GO:0044454 | nuclear chromosome part                     | 0.009        |
|         | GO:0016592 | mediator complex                            | 0.010        |
|         | GO:0005663 | DNA replication factor C complex            | 0.011        |

Continued on next page



| GO type | GO ID      | Description                                 | Adj. p-value |
|---------|------------|---------------------------------------------|--------------|
|         | GO:0016591 | DNA-directed RNA polymerase II, holoenzy... | 0.013        |
|         | GO:0005739 | mitochondrion                               | 0.015        |
|         | GO:0044427 | chromosomal part                            | 0.015        |
|         | GO:0005635 | nuclear envelope                            | 0.017        |
|         | GO:0090575 | RNA polymerase II transcription factor c... | 0.021        |
|         | GO:0005667 | transcription factor complex                | 0.021        |
|         | GO:0019898 | extrinsic component of membrane             | 0.022        |
|         | GO:0098687 | chromosomal region                          | 0.022        |
|         | GO:0009707 | chloroplast outer membrane                  | 0.031        |
|         | GO:0000243 | commitment complex                          | 0.033        |
|         | GO:0009527 | plastid outer membrane                      | 0.033        |
|         | GO:0005666 | DNA-directed RNA polymerase III complex     | 0.034        |
|         | GO:0030117 | membrane coat                               | 0.038        |
|         | GO:0048475 | coated membrane                             | 0.038        |
|         | GO:0044452 | nucleolar part                              | 0.045        |
|         | GO:0030677 | ribonuclease P complex                      | 0.046        |
|         | GO:0000782 | telomere cap complex                        | 0.049        |
|         | GO:0000783 | nuclear telomere cap complex                | 0.049        |
|         | GO:1902555 | endoribonuclease complex                    | 0.058        |
|         | GO:1905348 | endonuclease complex                        | 0.058        |
|         | GO:0033180 | proton-transporting V-type ATPase, V1 do... | 0.062        |
|         | GO:0030687 | preribosome, large subunit precursor        | 0.068        |
|         | GO:0005686 | U2 snRNP                                    | 0.076        |
|         | GO:1902554 | serine/threonine protein kinase complex     | 0.089        |
|         | GO:1902911 | protein kinase complex                      | 0.089        |
|         | GO:0005685 | U1 snRNP                                    | 0.094        |
|         | GO:0017053 | transcriptional repressor complex           | 0.094        |
|         | GO:0080008 | Cul4-RING E3 ubiquitin ligase complex       | 0.096        |
|         | GO:0030119 | AP-type membrane coat adaptor complex       | 0.097        |
|         | GO:0140097 | catalytic activity, acting on DNA           | 0.000        |
|         | GO:0003724 | RNA helicase activity                       | 0.000        |
|         | GO:0008094 | DNA-dependent ATPase activity               | 0.000        |
|         | GO:0008173 | RNA methyltransferase activity              | 0.000        |
|         | GO:0036459 | thiol-dependent ubiquitinyl hydrolase ac... | 0.000        |
|         | GO:0016893 | endonuclease activity, active with eithe... | 0.000        |
|         | GO:0140101 | catalytic activity, acting on a tRNA        | 0.000        |
|         | GO:0016779 | nucleotidyltransferase activity             | 0.001        |
|         | GO:0016891 | endoribonuclease activity, producing 5'-... | 0.001        |
|         | GO:0004540 | ribonuclease activity                       | 0.001        |
|         | GO:0016796 | exonuclease activity, active with either... | 0.002        |
|         | GO:0017076 | purine nucleotide binding                   | 0.003        |
|         | GO:0003682 | chromatin binding                           | 0.003        |
|         | GO:0008168 | methyltransferase activity                  | 0.003        |
|         | GO:0051082 | unfolded protein binding                    | 0.003        |
|         | GO:0030554 | adenyl nucleotide binding                   | 0.003        |
|         | GO:0043022 | ribosome binding                            | 0.003        |
|         | GO:0032555 | purine ribonucleotide binding               | 0.004        |
|         | GO:0032559 | adenyl ribonucleotide binding               | 0.004        |
|         | GO:0140102 | catalytic activity, acting on a rRNA        | 0.005        |

Continued on next page

| GO type | GO ID      | Description                                 | Adj. p-value |
|---------|------------|---------------------------------------------|--------------|
|         | GO:0051536 | iron-sulfur cluster binding                 | 0.005        |
|         | GO:0051540 | metal cluster binding                       | 0.005        |
|         | GO:0032553 | ribonucleotide binding                      | 0.005        |
|         | GO:0003924 | GTPase activity                             | 0.005        |
|         | GO:0004176 | ATP-dependent peptidase activity            | 0.005        |
|         | GO:0008649 | rRNA methyltransferase activity             | 0.005        |
|         | GO:0008757 | S-adenosylmethionine-dependent methyltra... | 0.006        |
|         | GO:0004402 | histone acetyltransferase activity          | 0.006        |
|         | GO:0061733 | peptide-lysine-N-acetyltransferase activ... | 0.006        |
|         | GO:0016896 | exoribonuclease activity, producing 5'-p... | 0.006        |
|         | GO:0097159 | organic cyclic compound binding             | 0.006        |
|         | GO:1901363 | heterocyclic compound binding               | 0.007        |
|         | GO:0004521 | endoribonuclease activity                   | 0.008        |
|         | GO:0016423 | tRNA (guanine) methyltransferase activit... | 0.008        |
|         | GO:0008409 | 5'-3' exonuclease activity                  | 0.009        |
|         | GO:0004536 | deoxyribonuclease activity                  | 0.009        |
|         | GO:0042162 | telomeric DNA binding                       | 0.010        |
|         | GO:0004532 | exoribonuclease activity                    | 0.010        |
|         | GO:0042393 | histone binding                             | 0.010        |
|         | GO:0016741 | transferase activity, transferring one-c... | 0.011        |
|         | GO:0003690 | double-stranded DNA binding                 | 0.011        |
|         | GO:0016874 | ligase activity                             | 0.015        |
|         | GO:0044877 | protein-containing complex binding          | 0.017        |
|         | GO:0097367 | carbohydrate derivative binding             | 0.018        |
|         | GO:0004520 | endodeoxyribonuclease activity              | 0.018        |
|         | GO:0003678 | DNA helicase activity                       | 0.020        |
|         | GO:0034212 | peptide N-acetyltransferase activity        | 0.021        |
|         | GO:0004843 | thiol-dependent ubiquitin-specific prote... | 0.022        |
|         | GO:0008080 | N-acetyltransferase activity                | 0.023        |
|         | GO:0004525 | ribonuclease III activity                   | 0.026        |
|         | GO:0032296 | double-stranded RNA-specific ribonucleas... | 0.026        |
|         | GO:0008175 | tRNA methyltransferase activity             | 0.026        |
|         | GO:0034061 | DNA polymerase activity                     | 0.026        |
|         | GO:0003916 | DNA topoisomerase activity                  | 0.031        |
|         | GO:0003689 | DNA clamp loader activity                   | 0.033        |
|         | GO:0033170 | protein-DNA loading ATPase activity         | 0.033        |
|         | GO:0043021 | ribonucleoprotein complex binding           | 0.036        |
|         | GO:0003887 | DNA-directed DNA polymerase activity        | 0.037        |
|         | GO:0034062 | 5'-3' RNA polymerase activity               | 0.040        |
|         | GO:0097747 | RNA polymerase activity                     | 0.040        |
|         | GO:0016884 | carbon-nitrogen ligase activity, with gl... | 0.041        |
|         | GO:0031072 | heat shock protein binding                  | 0.052        |
|         | GO:0003691 | double-stranded telomeric DNA binding       | 0.058        |
|         | GO:0004812 | aminoacyl-tRNA ligase activity              | 0.058        |
|         | GO:0016875 | ligase activity, forming carbon-oxygen b... | 0.058        |
|         | GO:0042803 | protein homodimerization activity           | 0.058        |
|         | GO:0000175 | 3'-5'-exoribonuclease activity              | 0.065        |
|         | GO:0004526 | ribonuclease P activity                     | 0.065        |
|         | GO:0003950 | NAD+ ADP-ribosyltransferase activity        | 0.065        |

Continued on next page

| GO type | GO ID      | Description                                 | Adj. p-value |
|---------|------------|---------------------------------------------|--------------|
|         | GO:0008234 | cysteine-type peptidase activity            | 0.068        |
|         | GO:0015631 | tubulin binding                             | 0.068        |
|         | GO:0019899 | enzyme binding                              | 0.068        |
|         | GO:0060589 | nucleoside-triphosphatase regulator acti... | 0.068        |
|         | GO:0000049 | tRNA binding                                | 0.069        |
|         | GO:0003712 | transcription cofactor activity             | 0.069        |
|         | GO:0017069 | snRNA binding                               | 0.074        |
|         | GO:0003899 | DNA-directed 5'-3' RNA polymerase activi... | 0.075        |
|         | GO:0003729 | mRNA binding                                | 0.076        |
|         | GO:0016774 | phosphotransferase activity, carboxyl gr... | 0.077        |
|         | GO:0016866 | intramolecular transferase activity         | 0.085        |
|         | GO:0016410 | N-acyltransferase activity                  | 0.087        |
|         | GO:0043168 | anion binding                               | 0.088        |

#### 4.3.17 Root - Preflowering - Cluster 17

| GO type | GO ID      | Description                                 | Adj. p-value |
|---------|------------|---------------------------------------------|--------------|
|         | GO:0016071 | mRNA metabolic process                      | 0.000        |
|         | GO:0042254 | ribosome biogenesis                         | 0.000        |
|         | GO:0009451 | RNA modification                            | 0.000        |
|         | GO:0043412 | macromolecule modification                  | 0.000        |
|         | GO:0019222 | regulation of metabolic process             | 0.000        |
|         | GO:0010468 | regulation of gene expression               | 0.000        |
|         | GO:0031323 | regulation of cellular metabolic process    | 0.000        |
|         | GO:0080090 | regulation of primary metabolic process     | 0.000        |
|         | GO:0006259 | DNA metabolic process                       | 0.000        |
|         | GO:0006399 | tRNA metabolic process                      | 0.000        |
|         | GO:2000112 | regulation of cellular macromolecule bio... | 0.000        |
|         | GO:0043414 | macromolecule methylation                   | 0.000        |
|         | GO:0019219 | regulation of nucleobase-containing comp... | 0.000        |
|         | GO:0043161 | proteasome-mediated ubiquitin-dependent ... | 0.000        |
|         | GO:0001510 | RNA methylation                             | 0.000        |
|         | GO:0070647 | protein modification by small protein co... | 0.000        |
|         | GO:0006400 | tRNA modification                           | 0.000        |
|         | GO:0032446 | protein modification by small protein co... | 0.000        |
|         | GO:0042273 | ribosomal large subunit biogenesis          | 0.000        |
|         | GO:0051276 | chromosome organization                     | 0.000        |
|         | GO:0006366 | transcription by RNA polymerase II          | 0.000        |
|         | GO:0006996 | organelle organization                      | 0.000        |
|         | GO:0090501 | RNA phosphodiester bond hydrolysis          | 0.000        |
|         | GO:0042274 | ribosomal small subunit biogenesis          | 0.000        |
|         | GO:0071826 | ribonucleoprotein complex subunit organi... | 0.000        |
|         | GO:0000154 | rRNA modification                           | 0.000        |
|         | GO:0022618 | ribonucleoprotein complex assembly          | 0.000        |
|         | GO:0009909 | regulation of flower development            | 0.000        |
|         | GO:0000245 | spliceosomal complex assembly               | 0.000        |
|         | GO:0010629 | negative regulation of gene expression      | 0.000        |
|         | GO:0006310 | DNA recombination                           | 0.000        |
|         | GO:0009658 | chloroplast organization                    | 0.000        |
|         | GO:0018205 | peptidyl-lysine modification                | 0.000        |
|         | GO:0030490 | maturation of SSU-rRNA                      | 0.000        |
|         | GO:0010608 | posttranscriptional regulation of gene e... | 0.000        |
|         | GO:0051173 | positive regulation of nitrogen compound... | 0.000        |
|         | GO:0000470 | maturation of LSU-rRNA                      | 0.000        |
|         | GO:0016458 | gene silencing                              | 0.001        |
|         | GO:0031167 | rRNA methylation                            | 0.001        |
|         | GO:0010604 | positive regulation of macromolecule met... | 0.001        |
|         | GO:0016569 | covalent chromatin modification             | 0.001        |
|         | GO:0031325 | positive regulation of cellular metaboli... | 0.001        |
|         | GO:0042255 | ribosome assembly                           | 0.001        |
|         | GO:0048518 | positive regulation of biological proces... | 0.001        |
|         | GO:0051603 | proteolysis involved in cellular protein... | 0.001        |
|         | GO:1901362 | organic cyclic compound biosynthetic pro... | 0.001        |

Continued on next page

| GO type | GO ID      | Description                                 | Adj. p-value |
|---------|------------|---------------------------------------------|--------------|
|         | GO:0002097 | tRNA wobble base modification               | 0.002        |
|         | GO:0072598 | protein localization to chloroplast         | 0.002        |
|         | GO:0000373 | Group II intron splicing                    | 0.002        |
|         | GO:0006352 | DNA-templated transcription, initiation     | 0.002        |
|         | GO:0031047 | gene silencing by RNA                       | 0.002        |
|         | GO:0000462 | maturation of SSU-rRNA from tricistronic... | 0.002        |
|         | GO:0065003 | protein-containing complex assembly         | 0.002        |
|         | GO:0006401 | RNA catabolic process                       | 0.002        |
|         | GO:0007127 | meiosis I                                   | 0.002        |
|         | GO:0061982 | meiosis I cell cycle process                | 0.002        |
|         | GO:0006379 | mRNA cleavage                               | 0.003        |
|         | GO:0010605 | negative regulation of macromolecule met... | 0.003        |
|         | GO:0048522 | positive regulation of cellular process     | 0.004        |
|         | GO:0006479 | protein methylation                         | 0.004        |
|         | GO:0008213 | protein alkylation                          | 0.004        |
|         | GO:0031123 | RNA 3'-end processing                       | 0.004        |
|         | GO:0016441 | posttranscriptional gene silencing          | 0.004        |
|         | GO:0006338 | chromatin remodeling                        | 0.004        |
|         | GO:0016556 | mRNA modification                           | 0.004        |
|         | GO:0015994 | chlorophyll metabolic process               | 0.005        |
|         | GO:0051168 | nuclear export                              | 0.005        |
|         | GO:0035196 | production of miRNAs involved in gene si... | 0.005        |
|         | GO:0043572 | plastid fission                             | 0.005        |
|         | GO:0007623 | circadian rhythm                            | 0.005        |
|         | GO:0048511 | rhythmic process                            | 0.005        |
|         | GO:0000460 | maturation of 5.8S rRNA                     | 0.006        |
|         | GO:0040029 | regulation of gene expression, epigeneti... | 0.006        |
|         | GO:2000026 | regulation of multicellular organismal d... | 0.006        |
|         | GO:0010228 | vegetative to reproductive phase transit... | 0.006        |
|         | GO:0009314 | response to radiation                       | 0.006        |
|         | GO:0006611 | protein export from nucleus                 | 0.007        |
|         | GO:0048285 | organelle fission                           | 0.007        |
|         | GO:0071806 | protein transmembrane transport             | 0.007        |
|         | GO:0006298 | mismatch repair                             | 0.007        |
|         | GO:0006302 | double-strand break repair                  | 0.007        |
|         | GO:0051028 | mRNA transport                              | 0.007        |
|         | GO:0090502 | RNA phosphodiester bond hydrolysis, endo... | 0.008        |
|         | GO:0000956 | nuclear-transcribed mRNA catabolic proce... | 0.009        |
|         | GO:0016570 | histone modification                        | 0.009        |
|         | GO:0010020 | chloroplast fission                         | 0.010        |
|         | GO:0033554 | cellular response to stress                 | 0.010        |
|         | GO:0006417 | regulation of translation                   | 0.010        |
|         | GO:0070925 | organelle assembly                          | 0.011        |
|         | GO:0043628 | ncRNA 3'-end processing                     | 0.011        |
|         | GO:0006402 | mRNA catabolic process                      | 0.012        |
|         | GO:0071166 | ribonucleoprotein complex localization      | 0.013        |
|         | GO:0071426 | ribonucleoprotein complex export from nu... | 0.013        |
|         | GO:0034248 | regulation of cellular amide metabolic p... | 0.013        |
|         | GO:0006403 | RNA localization                            | 0.013        |

Continued on next page

| GO type | GO ID      | Description                                 | Adj. p-value |
|---------|------------|---------------------------------------------|--------------|
|         | GO:0045143 | homologous chromosome segregation           | 0.014        |
|         | GO:0010628 | positive regulation of gene expression      | 0.015        |
|         | GO:0009416 | response to light stimulus                  | 0.015        |
|         | GO:0016073 | snRNA metabolic process                     | 0.015        |
|         | GO:0007059 | chromosome segregation                      | 0.018        |
|         | GO:0006383 | transcription by RNA polymerase III         | 0.018        |
|         | GO:0009648 | photoperiodism                              | 0.018        |
|         | GO:0000469 | cleavage involved in rRNA processing        | 0.019        |
|         | GO:0031328 | positive regulation of cellular biosynth... | 0.020        |
|         | GO:0007131 | reciprocal meiotic recombination            | 0.020        |
|         | GO:0035825 | homologous recombination                    | 0.020        |
|         | GO:0000160 | phosphorelay signal transduction system     | 0.021        |
|         | GO:0051053 | negative regulation of DNA metabolic pro... | 0.021        |
|         | GO:0051052 | regulation of DNA metabolic process         | 0.021        |
|         | GO:0009891 | positive regulation of biosynthetic proc... | 0.022        |
|         | GO:0065002 | intracellular protein transmembrane tran... | 0.022        |
|         | GO:0045132 | meiotic chromosome segregation              | 0.023        |
|         | GO:2000024 | regulation of leaf development              | 0.023        |
|         | GO:0007129 | synapsis                                    | 0.025        |
|         | GO:0070192 | chromosome organization involved in meio... | 0.026        |
|         | GO:0006413 | translational initiation                    | 0.027        |
|         | GO:0035303 | regulation of dephosphorylation             | 0.027        |
|         | GO:0033013 | tetrapyrrole metabolic process              | 0.028        |
|         | GO:0048573 | photoperiodism, flowering                   | 0.029        |
|         | GO:0051246 | regulation of protein metabolic process     | 0.029        |
|         | GO:0006779 | porphyrin-containing compound biosynthet... | 0.030        |
|         | GO:0090056 | regulation of chlorophyll metabolic proc... | 0.030        |
|         | GO:0098813 | nuclear chromosome segregation              | 0.030        |
|         | GO:0032268 | regulation of cellular protein metabolic... | 0.030        |
|         | GO:0140013 | meiotic nuclear division                    | 0.030        |
|         | GO:0032784 | regulation of DNA-templated transcriptio... | 0.031        |
|         | GO:0031050 | dsRNA fragmentation                         | 0.032        |
|         | GO:0043331 | response to dsRNA                           | 0.032        |
|         | GO:0070918 | production of small RNA involved in gene... | 0.032        |
|         | GO:0071359 | cellular response to dsRNA                  | 0.032        |
|         | GO:0071478 | cellular response to radiation              | 0.033        |
|         | GO:0015979 | photosynthesis                              | 0.033        |
|         | GO:0018193 | peptidyl-amino acid modification            | 0.035        |
|         | GO:1901401 | regulation of tetrapyrrole metabolic pro... | 0.035        |
|         | GO:0018022 | peptidyl-lysine methylation                 | 0.036        |
|         | GO:0006778 | porphyrin-containing compound metabolic ... | 0.037        |
|         | GO:0048581 | negative regulation of post-embryonic de... | 0.037        |
|         | GO:0051241 | negative regulation of multicellular org... | 0.037        |
|         | GO:0006913 | nucleocytoplasmic transport                 | 0.037        |
|         | GO:0010921 | regulation of phosphatase activity          | 0.037        |
|         | GO:0051169 | nuclear transport                           | 0.037        |
|         | GO:2001020 | regulation of response to DNA damage sti... | 0.039        |
|         | GO:0000027 | ribosomal large subunit assembly            | 0.040        |
|         | GO:0031124 | mRNA 3'-end processing                      | 0.040        |

Continued on next page

| GO type | GO ID      | Description                                 | Adj. p-value |
|---------|------------|---------------------------------------------|--------------|
|         | GO:0031399 | regulation of protein modification proce... | 0.040        |
|         | GO:0033014 | tetrapyrrole biosynthetic process           | 0.041        |
|         | GO:0071482 | cellular response to light stimulus         | 0.041        |
|         | GO:0065007 | biological regulation                       | 0.042        |
|         | GO:0009736 | cytokinin-activated signaling pathway       | 0.042        |
|         | GO:0016074 | snoRNA metabolic process                    | 0.042        |
|         | GO:0043144 | snoRNA processing                           | 0.042        |
|         | GO:0071103 | DNA conformation change                     | 0.043        |
|         | GO:0006470 | protein dephosphorylation                   | 0.043        |
|         | GO:0006304 | DNA modification                            | 0.044        |
|         | GO:0044728 | DNA methylation or demethylation            | 0.044        |
|         | GO:0090503 | RNA phosphodiester bond hydrolysis, exon... | 0.044        |
|         | GO:0006568 | tryptophan metabolic process                | 0.045        |
|         | GO:0006586 | indolalkylamine metabolic process           | 0.045        |
|         | GO:2000113 | negative regulation of cellular macromol... | 0.045        |
|         | GO:0016043 | cellular component organization             | 0.045        |
|         | GO:0000478 | endonucleolytic cleavage involved in rRN... | 0.046        |
|         | GO:0032544 | plastid translation                         | 0.048        |
|         | GO:0010212 | response to ionizing radiation              | 0.048        |
|         | GO:0000280 | nuclear division                            | 0.049        |
|         | GO:2000242 | negative regulation of reproductive proc... | 0.050        |
|         | GO:0009910 | negative regulation of flower developmen... | 0.050        |
|         | GO:0010224 | response to UV-B                            | 0.051        |
|         | GO:0000725 | recombinational repair                      | 0.052        |
|         | GO:0000463 | maturation of LSU-rRNA from tricistronic... | 0.052        |
|         | GO:0033365 | protein localization to organelle           | 0.052        |
|         | GO:0000466 | maturation of 5.8S rRNA from tricistroni... | 0.052        |
|         | GO:0000184 | nuclear-transcribed mRNA catabolic proce... | 0.053        |
|         | GO:0006354 | DNA-templated transcription, elongation     | 0.053        |
|         | GO:0015931 | nucleobase-containing compound transport    | 0.053        |
|         | GO:0010380 | regulation of chlorophyll biosynthetic p... | 0.056        |
|         | GO:0000162 | tryptophan biosynthetic process             | 0.057        |
|         | GO:0046219 | indolalkylamine biosynthetic process        | 0.057        |
|         | GO:0070475 | rRNA base methylation                       | 0.058        |
|         | GO:0009668 | plastid membrane organization               | 0.058        |
|         | GO:0010027 | thylakoid membrane organization             | 0.058        |
|         | GO:1901699 | cellular response to nitrogen compound      | 0.058        |
|         | GO:0007062 | sister chromatid cohesion                   | 0.061        |
|         | GO:0009411 | response to UV                              | 0.063        |
|         | GO:0051321 | meiotic cell cycle                          | 0.064        |
|         | GO:0071824 | protein-DNA complex subunit organization    | 0.064        |
|         | GO:0008284 | positive regulation of cell proliferatio... | 0.064        |
|         | GO:0017038 | protein import                              | 0.067        |
|         | GO:0035194 | posttranscriptional gene silencing by RN... | 0.069        |
|         | GO:0000122 | negative regulation of transcription by ... | 0.069        |
|         | GO:0048571 | long-day photoperiodism                     | 0.071        |
|         | GO:0030163 | protein catabolic process                   | 0.075        |
|         | GO:0000724 | double-strand break repair via homologou... | 0.077        |
|         | GO:0043574 | peroxisomal transport                       | 0.077        |

Continued on next page

| GO type | GO ID      | Description                                 | Adj. p-value |
|---------|------------|---------------------------------------------|--------------|
|         | GO:0006368 | transcription elongation from RNA polyme... | 0.077        |
|         | GO:0031053 | primary miRNA processing                    | 0.077        |
|         | GO:1902022 | L-lysine transport                          | 0.081        |
|         | GO:1903401 | L-lysine transmembrane transport            | 0.081        |
|         | GO:0044743 | protein transmembrane import into intrac... | 0.083        |
|         | GO:0051193 | regulation of cofactor metabolic process    | 0.083        |
|         | GO:2000030 | regulation of response to red or far red... | 0.087        |
|         | GO:0010109 | regulation of photosynthesis                | 0.089        |
|         | GO:1903046 | meiotic cell cycle process                  | 0.091        |
|         | GO:0009583 | detection of light stimulus                 | 0.092        |
|         | GO:0071368 | cellular response to cytokinin stimulus     | 0.092        |
|         | GO:1990904 | ribonucleoprotein complex                   | 0.000        |
|         | GO:1990234 | transferase complex                         | 0.000        |
|         | GO:0005654 | nucleoplasm                                 | 0.000        |
|         | GO:0044451 | nucleoplasm part                            | 0.000        |
|         | GO:0044435 | plastid part                                | 0.000        |
|         | GO:0044434 | chloroplast part                            | 0.000        |
|         | GO:0031461 | cullin-RING ubiquitin ligase complex        | 0.000        |
|         | GO:0000151 | ubiquitin ligase complex                    | 0.000        |
|         | GO:0005684 | U2-type spliceosomal complex                | 0.000        |
|         | GO:0009534 | chloroplast thylakoid                       | 0.000        |
|         | GO:0042651 | thylakoid membrane                          | 0.000        |
|         | GO:0016604 | nuclear body                                | 0.000        |
|         | GO:0055035 | plastid thylakoid membrane                  | 0.000        |
|         | GO:0071010 | prespliceosome                              | 0.000        |
|         | GO:0005694 | chromosome                                  | 0.000        |
|         | GO:0016607 | nuclear speck                               | 0.001        |
|         | GO:0009295 | nucleoid                                    | 0.001        |
|         | GO:0080008 | Cul4-RING E3 ubiquitin ligase complex       | 0.001        |
|         | GO:0009508 | plastid chromosome                          | 0.001        |
|         | GO:0000228 | nuclear chromosome                          | 0.002        |
|         | GO:0000229 | cytoplasmic chromosome                      | 0.003        |
|         | GO:0030687 | preribosome, large subunit precursor        | 0.003        |
|         | GO:0005732 | small nucleolar ribonucleoprotein comple... | 0.004        |
|         | GO:0005689 | U12-type spliceosomal complex               | 0.004        |
|         | GO:0005759 | mitochondrial matrix                        | 0.005        |
|         | GO:0008023 | transcription elongation factor complex     | 0.005        |
|         | GO:0042646 | plastid nucleoid                            | 0.005        |
| CC      | GO:0000123 | histone acetyltransferase complex           | 0.005        |
|         | GO:0015030 | Cajal body                                  | 0.006        |
|         | GO:0005685 | U1 snRNP                                    | 0.007        |
|         | GO:0005666 | DNA-directed RNA polymerase III complex     | 0.012        |
|         | GO:0000178 | exosome (RNase complex)                     | 0.013        |
|         | GO:1905354 | exoribonuclease complex                     | 0.013        |
|         | GO:0031248 | protein acetyltransferase complex           | 0.013        |
|         | GO:1902493 | acetyltransferase complex                   | 0.013        |
|         | GO:0097526 | spliceosomal tri-snRNP complex              | 0.018        |
|         | GO:1902555 | endoribonuclease complex                    | 0.018        |
|         | GO:1905348 | endonuclease complex                        | 0.018        |

Continued on next page



| GO type | GO ID      | Description                                 | Adj. p-value |
|---------|------------|---------------------------------------------|--------------|
|         | GO:0005643 | nuclear pore                                | 0.019        |
|         | GO:0009706 | chloroplast inner membrane                  | 0.020        |
|         | GO:0044454 | nuclear chromosome part                     | 0.024        |
|         | GO:0009528 | plastid inner membrane                      | 0.024        |
|         | GO:0000176 | nuclear exosome (RNase complex)             | 0.028        |
|         | GO:0005665 | DNA-directed RNA polymerase II, core com... | 0.030        |
|         | GO:0046540 | U4/U6 x U5 tri-snRNP complex                | 0.033        |
|         | GO:0000784 | nuclear chromosome, telomeric region        | 0.037        |
|         | GO:0005682 | U5 snRNP                                    | 0.037        |
|         | GO:0000243 | commitment complex                          | 0.043        |
|         | GO:1902554 | serine/threonine protein kinase complex     | 0.043        |
|         | GO:1902911 | protein kinase complex                      | 0.043        |
|         | GO:0044427 | chromosomal part                            | 0.051        |
|         | GO:0000793 | condensed chromosome                        | 0.053        |
|         | GO:0000781 | chromosome, telomeric region                | 0.057        |
|         | GO:0000794 | condensed nuclear chromosome                | 0.068        |
|         | GO:0030677 | ribonuclease P complex                      | 0.080        |
|         | GO:0000785 | chromatin                                   | 0.083        |
|         | GO:0140098 | catalytic activity, acting on RNA           | 0.000        |
|         | GO:0004518 | nuclease activity                           | 0.000        |
|         | GO:0004519 | endonuclease activity                       | 0.000        |
|         | GO:0003677 | DNA binding                                 | 0.000        |
|         | GO:0003724 | RNA helicase activity                       | 0.000        |
|         | GO:0140101 | catalytic activity, acting on a tRNA        | 0.000        |
|         | GO:0016893 | endonuclease activity, active with eithe... | 0.000        |
|         | GO:0008094 | DNA-dependent ATPase activity               | 0.001        |
|         | GO:0003697 | single-stranded DNA binding                 | 0.004        |
|         | GO:0016891 | endoribonuclease activity, producing 5'-... | 0.005        |
|         | GO:0030983 | mismatched DNA binding                      | 0.009        |
|         | GO:0004536 | deoxyribonuclease activity                  | 0.012        |
|         | GO:0043021 | ribonucleoprotein complex binding           | 0.012        |
|         | GO:0003684 | damaged DNA binding                         | 0.012        |
|         | GO:0004532 | exoribonuclease activity                    | 0.012        |
|         | GO:0003725 | double-stranded RNA binding                 | 0.013        |
|         | GO:0004521 | endoribonuclease activity                   | 0.014        |
|         | GO:0003682 | chromatin binding                           | 0.015        |
| MF      | GO:0140102 | catalytic activity, acting on a rRNA        | 0.017        |
|         | GO:0016896 | exoribonuclease activity, producing 5'-p... | 0.017        |
|         | GO:0042393 | histone binding                             | 0.018        |
|         | GO:0008170 | N-methyltransferase activity                | 0.018        |
|         | GO:0004520 | endodeoxyribonuclease activity              | 0.020        |
|         | GO:0140097 | catalytic activity, acting on DNA           | 0.020        |
|         | GO:0044877 | protein-containing complex binding          | 0.021        |
|         | GO:0019843 | rRNA binding                                | 0.023        |
|         | GO:0004003 | ATP-dependent DNA helicase activity         | 0.029        |
|         | GO:0016779 | nucleotidyltransferase activity             | 0.029        |
|         | GO:0008097 | 5S rRNA binding                             | 0.032        |
|         | GO:0017069 | snRNA binding                               | 0.032        |
|         | GO:0003729 | mRNA binding                                | 0.034        |

Continued on next page

---

| GO type | GO ID      | Description                            | Adj. p-value |
|---------|------------|----------------------------------------|--------------|
|         | GO:0004549 | tRNA-specific ribonuclease activity    | 0.050        |
|         | GO:0003727 | single-stranded RNA binding            | 0.050        |
|         | GO:0035064 | methylated histone binding             | 0.078        |
|         | GO:0140034 | methylation-dependent protein binding  | 0.078        |
|         | GO:0043022 | ribosome binding                       | 0.088        |
|         | GO:0140030 | modification-dependent protein binding | 0.091        |

---

#### 4.3.18 Root - Preflowering - Cluster 18

| GO type | GO ID      | Description                                 | Adj. p-value |
|---------|------------|---------------------------------------------|--------------|
|         | GO:0019748 | secondary metabolic process                 | 0.000        |
|         | GO:0009404 | toxin metabolic process                     | 0.000        |
|         | GO:0042430 | indole-containing compound metabolic pro... | 0.002        |
|         | GO:0003333 | amino acid transmembrane transport          | 0.002        |
|         | GO:0015749 | monosaccharide transmembrane transport      | 0.005        |
|         | GO:0008645 | hexose transmembrane transport              | 0.006        |
|         | GO:1904659 | glucose transmembrane transport             | 0.011        |
|         | GO:0009072 | aromatic amino acid family metabolic pro... | 0.011        |
|         | GO:0009073 | aromatic amino acid family biosynthetic ... | 0.014        |
|         | GO:0008152 | metabolic process                           | 0.014        |
|         | GO:0006575 | cellular modified amino acid metabolic p... | 0.015        |
|         | GO:0005996 | monosaccharide metabolic process            | 0.016        |
|         | GO:0046323 | glucose import                              | 0.018        |
|         | GO:0006508 | proteolysis                                 | 0.020        |
|         | GO:0042493 | response to drug                            | 0.020        |
|         | GO:1902022 | L-lysine transport                          | 0.020        |
|         | GO:1903401 | L-lysine transmembrane transport            | 0.020        |
|         | GO:0006811 | ion transport                               | 0.020        |
|         | GO:0007154 | cell communication                          | 0.022        |
|         | GO:0046942 | carboxylic acid transport                   | 0.024        |
|         | GO:0006568 | tryptophan metabolic process                | 0.032        |
|         | GO:0006586 | indolalkylamine metabolic process           | 0.032        |
|         | GO:1905039 | carboxylic acid transmembrane transport     | 0.034        |
|         | GO:0006820 | anion transport                             | 0.034        |
|         | GO:0042445 | hormone metabolic process                   | 0.036        |
|         | GO:0015849 | organic acid transport                      | 0.042        |
|         | GO:0032787 | monocarboxylic acid metabolic process       | 0.047        |
|         | GO:0071577 | zinc ion transmembrane transport            | 0.047        |
|         | GO:0006026 | aminoglycan catabolic process               | 0.050        |
|         | GO:0006030 | chitin metabolic process                    | 0.050        |
|         | GO:0006032 | chitin catabolic process                    | 0.050        |
|         | GO:0009308 | amine metabolic process                     | 0.050        |
| BP      | GO:0046348 | amino sugar catabolic process               | 0.050        |
|         | GO:1901072 | glucosamine-containing compound cataboli... | 0.050        |
|         | GO:1903825 | organic acid transmembrane transport        | 0.054        |
|         | GO:0072523 | purine-containing compound catabolic pro... | 0.055        |
|         | GO:0030163 | protein catabolic process                   | 0.061        |
|         | GO:0098754 | detoxification                              | 0.065        |
|         | GO:0051603 | proteolysis involved in cellular protein... | 0.065        |
|         | GO:0098656 | anion transmembrane transport               | 0.067        |
|         | GO:0034219 | carbohydrate transmembrane transport        | 0.072        |
|         | GO:0006810 | transport                                   | 0.073        |
|         | GO:0045861 | negative regulation of proteolysis          | 0.073        |
|         | GO:0010466 | negative regulation of peptidase activit... | 0.077        |
|         | GO:0010951 | negative regulation of endopeptidase act... | 0.077        |
|         | GO:0052547 | regulation of peptidase activity            | 0.077        |

Continued on next page

| GO type | GO ID      | Description                                 | Adj. p-value |
|---------|------------|---------------------------------------------|--------------|
|         | GO:0052548 | regulation of endopeptidase activity        | 0.077        |
|         | GO:0015706 | nitrate transport                           | 0.078        |
|         | GO:0044257 | cellular protein catabolic process          | 0.078        |
|         | GO:0000162 | tryptophan biosynthetic process             | 0.081        |
|         | GO:0046219 | indolalkylamine biosynthetic process        | 0.081        |
|         | GO:0080163 | regulation of protein serine/threonine p... | 0.081        |
|         | GO:0006829 | zinc ion transport                          | 0.083        |
|         | GO:0051234 | establishment of localization               | 0.083        |
|         | GO:1901071 | glucosamine-containing compound metaboli... | 0.083        |
|         | GO:0006022 | aminoglycan metabolic process               | 0.087        |
|         | GO:0042737 | drug catabolic process                      | 0.092        |
|         | GO:0009611 | response to wounding                        | 0.093        |
|         | GO:0043666 | regulation of phosphoprotein phosphatase... | 0.093        |
|         | GO:0015802 | basic amino acid transport                  | 0.094        |
|         | GO:0000041 | transition metal ion transport              | 0.097        |
|         | GO:0015698 | inorganic anion transport                   | 0.098        |
|         | GO:0015711 | organic anion transport                     | 0.098        |
|         | GO:0006040 | amino sugar metabolic process               | 0.099        |
|         | GO:1902475 | L-alpha-amino acid transmembrane transpo... | 0.099        |
|         | GO:0006836 | neurotransmitter transport                  | 0.100        |
|         | GO:0071944 | cell periphery                              | 0.000        |
|         | GO:0000323 | lytic vacuole                               | 0.000        |
|         | GO:1905368 | peptidase complex                           | 0.001        |
| CC      | GO:0005839 | proteasome core complex                     | 0.002        |
|         | GO:0005576 | extracellular region                        | 0.010        |
|         | GO:0019773 | proteasome core complex, alpha-subunit c... | 0.029        |
|         | GO:0044421 | extracellular region part                   | 0.036        |
|         | GO:0005615 | extracellular space                         | 0.064        |
|         | GO:0004672 | protein kinase activity                     | 0.000        |
|         | GO:0005215 | transporter activity                        | 0.000        |
|         | GO:0022857 | transmembrane transporter activity          | 0.000        |
|         | GO:0016705 | oxidoreductase activity, acting on paire... | 0.000        |
|         | GO:0015291 | secondary active transmembrane transport... | 0.000        |
|         | GO:0030246 | carbohydrate binding                        | 0.000        |
|         | GO:0016829 | lyase activity                              | 0.002        |
|         | GO:0004298 | threonine-type endopeptidase activity       | 0.002        |
|         | GO:0015145 | monosaccharide transmembrane transporter... | 0.002        |
|         | GO:0070003 | threonine-type peptidase activity           | 0.002        |
|         | GO:0001067 | regulatory region nucleic acid binding      | 0.002        |
|         | GO:0015149 | hexose transmembrane transporter activit... | 0.002        |
|         | GO:0015172 | acidic amino acid transmembrane transpor... | 0.002        |
|         | GO:0044212 | transcription regulatory region DNA bind... | 0.002        |
|         | GO:0051213 | dioxygenase activity                        | 0.002        |
|         | GO:0043565 | sequence-specific DNA binding               | 0.002        |
|         | GO:0015171 | amino acid transmembrane transporter act... | 0.002        |
|         | GO:0001871 | pattern binding                             | 0.002        |
|         | GO:0030247 | polysaccharide binding                      | 0.002        |
|         | GO:0004197 | cysteine-type endopeptidase activity        | 0.002        |
|         | GO:0015318 | inorganic molecular entity transmembrane... | 0.002        |

Continued on next page

| GO type | GO ID      | Description                                 | Adj. p-value |
|---------|------------|---------------------------------------------|--------------|
|         | GO:0004867 | serine-type endopeptidase inhibitor acti... | 0.003        |
|         | GO:0005355 | glucose transmembrane transporter activi... | 0.003        |
|         | GO:0051119 | sugar transmembrane transporter activity    | 0.004        |
|         | GO:0008144 | drug binding                                | 0.004        |
|         | GO:0015181 | arginine transmembrane transporter activ... | 0.004        |
|         | GO:0015189 | L-lysine transmembrane transporter activ... | 0.004        |
|         | GO:0015075 | ion transmembrane transporter activity      | 0.006        |
|         | GO:0004190 | aspartic-type endopeptidase activity        | 0.007        |
|         | GO:0070001 | aspartic-type peptidase activity            | 0.007        |
|         | GO:0015144 | carbohydrate transmembrane transporter a... | 0.009        |
|         | GO:0061630 | ubiquitin protein ligase activity           | 0.009        |
|         | GO:0015295 | solute:proton symporter activity            | 0.010        |
|         | GO:0004568 | chitinase activity                          | 0.011        |
|         | GO:0005351 | carbohydrate:proton symporter activity      | 0.012        |
|         | GO:0005402 | carbohydrate:cation symporter activity      | 0.012        |
|         | GO:0046527 | glucosyltransferase activity                | 0.012        |
|         | GO:0015293 | symporter activity                          | 0.012        |
|         | GO:0005385 | zinc ion transmembrane transporter activ... | 0.013        |
|         | GO:0016765 | transferase activity, transferring alkyl... | 0.013        |
|         | GO:0015174 | basic amino acid transmembrane transport... | 0.013        |
|         | GO:0008194 | UDP-glycosyltransferase activity            | 0.015        |
|         | GO:0008233 | peptidase activity                          | 0.022        |
|         | GO:0015294 | solute:cation symporter activity            | 0.023        |
|         | GO:0070011 | peptidase activity, acting on L-amino ac... | 0.025        |
|         | GO:0004185 | serine-type carboxypeptidase activity       | 0.026        |
|         | GO:0003959 | NADPH dehydrogenase activity                | 0.026        |
|         | GO:0070008 | serine-type exopeptidase activity           | 0.027        |
|         | GO:0004864 | protein phosphatase inhibitor activity      | 0.029        |
|         | GO:0005524 | ATP binding                                 | 0.029        |
|         | GO:0019212 | phosphatase inhibitor activity              | 0.029        |
|         | GO:0016682 | oxidoreductase activity, acting on diphe... | 0.034        |
|         | GO:0004180 | carboxypeptidase activity                   | 0.034        |
|         | GO:0005326 | neurotransmitter transporter activity       | 0.034        |
|         | GO:0016863 | intramolecular oxidoreductase activity, ... | 0.034        |
|         | GO:0015112 | nitrate transmembrane transporter activi... | 0.035        |
|         | GO:0046943 | carboxylic acid transmembrane transporte... | 0.036        |
|         | GO:0072509 | divalent inorganic cation transmembrane ... | 0.037        |
|         | GO:0046915 | transition metal ion transmembrane trans... | 0.039        |
|         | GO:0008483 | transaminase activity                       | 0.044        |
|         | GO:0016769 | transferase activity, transferring nitro... | 0.044        |
|         | GO:0015179 | L-amino acid transmembrane transporter a... | 0.045        |
|         | GO:0016679 | oxidoreductase activity, acting on diphe... | 0.048        |
|         | GO:0019208 | phosphatase regulator activity              | 0.048        |
|         | GO:0019888 | protein phosphatase regulator activity      | 0.048        |
|         | GO:0016838 | carbon-oxygen lyase activity, acting on ... | 0.050        |
|         | GO:0005509 | calcium ion binding                         | 0.053        |
|         | GO:0008509 | anion transmembrane transporter activity    | 0.054        |
|         | GO:0005342 | organic acid transmembrane transporter a... | 0.057        |
|         | GO:0008324 | cation transmembrane transporter activit... | 0.068        |

Continued on next page

| GO type | GO ID      | Description                                 | Adj. p-value |
|---------|------------|---------------------------------------------|--------------|
|         | GO:0005315 | inorganic phosphate transmembrane transp... | 0.083        |
|         | GO:0043167 | ion binding                                 | 0.085        |
|         | GO:0015297 | antiporter activity                         | 0.087        |
|         | GO:0052716 | hydroquinone:oxygen oxidoreductase activ... | 0.089        |
|         | GO:0015175 | neutral amino acid transmembrane transpo... | 0.097        |
|         | GO:0016746 | transferase activity, transferring acyl ... | 0.098        |
|         | GO:0032559 | adenyl ribonucleotide binding               | 0.099        |
|         | GO:0042887 | amide transmembrane transporter activity    | 0.099        |

#### 4.3.19 Root - Preflowering - Cluster 19

| GO type | GO ID      | Description                                 | Adj. p-value |
|---------|------------|---------------------------------------------|--------------|
| BP      | GO:0006865 | amino acid transport                        | 0.006        |
|         | GO:0006857 | oligopeptide transport                      | 0.007        |
|         | GO:0005996 | monosaccharide metabolic process            | 0.007        |
|         | GO:0006810 | transport                                   | 0.007        |
|         | GO:0003333 | amino acid transmembrane transport          | 0.008        |
|         | GO:0051234 | establishment of localization               | 0.010        |
|         | GO:0019752 | carboxylic acid metabolic process           | 0.011        |
|         | GO:0080163 | regulation of protein serine/threonine p... | 0.013        |
|         | GO:0030163 | protein catabolic process                   | 0.016        |
|         | GO:0046942 | carboxylic acid transport                   | 0.020        |
|         | GO:0051179 | localization                                | 0.020        |
|         | GO:0009753 | response to jasmonic acid                   | 0.032        |
|         | GO:0015849 | organic acid transport                      | 0.036        |
|         | GO:0044257 | cellular protein catabolic process          | 0.042        |
|         | GO:1905039 | carboxylic acid transmembrane transport     | 0.048        |
|         | GO:0009751 | response to salicylic acid                  | 0.049        |
|         | GO:0055114 | oxidation-reduction process                 | 0.056        |
|         | GO:0043666 | regulation of phosphoprotein phosphatase... | 0.057        |
|         | GO:0051603 | proteolysis involved in cellular protein... | 0.063        |
|         | GO:0006508 | proteolysis                                 | 0.071        |
|         | GO:0034219 | carbohydrate transmembrane transport        | 0.077        |
|         | GO:0006820 | anion transport                             | 0.077        |
|         | GO:1903825 | organic acid transmembrane transport        | 0.079        |
|         | GO:0044092 | negative regulation of molecular functio... | 0.080        |
|         | GO:0072523 | purine-containing compound catabolic pro... | 0.080        |
|         | GO:0008643 | carbohydrate transport                      | 0.080        |
|         | GO:0006575 | cellular modified amino acid metabolic p... | 0.083        |
|         | GO:0010921 | regulation of phosphatase activity          | 0.089        |
|         | GO:0035304 | regulation of protein dephosphorylation     | 0.089        |
|         | GO:0006749 | glutathione metabolic process               | 0.090        |
|         | GO:0006811 | ion transport                               | 0.090        |
|         | GO:0006817 | phosphate ion transport                     | 0.090        |
|         | GO:1901264 | carbohydrate derivative transport           | 0.090        |
| CC      | GO:0005886 | plasma membrane                             | 0.000        |
|         | GO:0000323 | lytic vacuole                               | 0.000        |
|         | GO:0004672 | protein kinase activity                     | 0.000        |
|         | GO:0005215 | transporter activity                        | 0.000        |
|         | GO:0022857 | transmembrane transporter activity          | 0.000        |
|         | GO:0016705 | oxidoreductase activity, acting on paire... | 0.000        |
|         | GO:0015291 | secondary active transmembrane transport... | 0.000        |
|         | GO:0022804 | active transmembrane transporter activit... | 0.000        |
|         | GO:0043565 | sequence-specific DNA binding               | 0.000        |
|         | GO:0001067 | regulatory region nucleic acid binding      | 0.002        |
|         | GO:0044212 | transcription regulatory region DNA bind... | 0.002        |
|         | GO:0004175 | endopeptidase activity                      | 0.002        |
|         | GO:0015144 | carbohydrate transmembrane transporter a... | 0.004        |

Continued on next page

| GO type | GO ID      | Description                                 | Adj. p-value |
|---------|------------|---------------------------------------------|--------------|
|         | GO:0015295 | solute:proton symporter activity            | 0.004        |
|         | GO:0005351 | carbohydrate:proton symporter activity      | 0.004        |
|         | GO:0005402 | carbohydrate:cation symporter activity      | 0.004        |
|         | GO:0015171 | amino acid transmembrane transporter act... | 0.004        |
|         | GO:0015293 | symporter activity                          | 0.005        |
|         | GO:0030414 | peptidase inhibitor activity                | 0.005        |
|         | GO:0061134 | peptidase regulator activity                | 0.005        |
|         | GO:0015075 | ion transmembrane transporter activity      | 0.005        |
|         | GO:0070011 | peptidase activity, acting on L-amino ac... | 0.007        |
|         | GO:0004866 | endopeptidase inhibitor activity            | 0.009        |
|         | GO:0061135 | endopeptidase regulator activity            | 0.009        |
|         | GO:0015294 | solute:cation symporter activity            | 0.009        |
|         | GO:0004190 | aspartic-type endopeptidase activity        | 0.009        |
|         | GO:0070001 | aspartic-type peptidase activity            | 0.009        |
|         | GO:0008233 | peptidase activity                          | 0.010        |
|         | GO:0004867 | serine-type endopeptidase inhibitor acti... | 0.012        |
|         | GO:0051213 | dioxygenase activity                        | 0.013        |
|         | GO:0016765 | transferase activity, transferring alkyl... | 0.013        |
|         | GO:0004864 | protein phosphatase inhibitor activity      | 0.013        |
|         | GO:0019212 | phosphatase inhibitor activity              | 0.013        |
|         | GO:0004185 | serine-type carboxypeptidase activity       | 0.014        |
|         | GO:0004364 | glutathione transferase activity            | 0.014        |
|         | GO:0046527 | glucosyltransferase activity                | 0.015        |
|         | GO:0070008 | serine-type exopeptidase activity           | 0.017        |
|         | GO:0004197 | cysteine-type endopeptidase activity        | 0.017        |
|         | GO:0004180 | carboxypeptidase activity                   | 0.019        |
|         | GO:0016829 | lyase activity                              | 0.019        |
|         | GO:0008144 | drug binding                                | 0.019        |
|         | GO:0019208 | phosphatase regulator activity              | 0.022        |
|         | GO:0019888 | protein phosphatase regulator activity      | 0.022        |
|         | GO:0010427 | abscisic acid binding                       | 0.029        |
|         | GO:0008324 | cation transmembrane transporter activit... | 0.032        |
|         | GO:0008194 | UDP-glycosyltransferase activity            | 0.033        |
|         | GO:0042887 | amide transmembrane transporter activity    | 0.033        |
|         | GO:0015238 | drug transmembrane transporter activity     | 0.036        |
|         | GO:0019840 | isoprenoid binding                          | 0.040        |
|         | GO:0008061 | chitin binding                              | 0.041        |
|         | GO:0046943 | carboxylic acid transmembrane transporte... | 0.055        |
|         | GO:0015112 | nitrate transmembrane transporter activi... | 0.057        |
|         | GO:1904680 | peptide transmembrane transporter activi... | 0.057        |
|         | GO:0043178 | alcohol binding                             | 0.058        |
|         | GO:0052716 | hydroquinone:oxygen oxidoreductase activ... | 0.061        |
|         | GO:0004568 | chitinase activity                          | 0.063        |
|         | GO:0042562 | hormone binding                             | 0.070        |
|         | GO:0003959 | NADPH dehydrogenase activity                | 0.072        |
|         | GO:0001871 | pattern binding                             | 0.084        |
|         | GO:0005342 | organic acid transmembrane transporter a... | 0.084        |
|         | GO:0008509 | anion transmembrane transporter activity    | 0.084        |
|         | GO:0030247 | polysaccharide binding                      | 0.084        |

Continued on next page



---

| GO type | GO ID      | Description                                 | Adj. p-value |
|---------|------------|---------------------------------------------|--------------|
|         | GO:0016746 | transferase activity, transferring acyl ... | 0.084        |
|         | GO:0008236 | serine-type peptidase activity              | 0.085        |
|         | GO:0017171 | serine hydrolase activity                   | 0.085        |
|         | GO:0005315 | inorganic phosphate transmembrane transp... | 0.090        |

---

#### 4.3.20 Root - Preflowering - Cluster 20

| GO type | GO ID      | Description                                 | Adj. p-value |
|---------|------------|---------------------------------------------|--------------|
|         | GO:0007017 | microtubule-based process                   | 0.000        |
|         | GO:0005975 | carbohydrate metabolic process              | 0.000        |
|         | GO:0044264 | cellular polysaccharide metabolic proces... | 0.000        |
|         | GO:0016052 | carbohydrate catabolic process              | 0.000        |
|         | GO:0044036 | cell wall macromolecule metabolic proces... | 0.000        |
|         | GO:0000902 | cell morphogenesis                          | 0.000        |
|         | GO:1903047 | mitotic cell cycle process                  | 0.000        |
|         | GO:0048856 | anatomical structure development            | 0.000        |
|         | GO:0046034 | ATP metabolic process                       | 0.000        |
|         | GO:0010383 | cell wall polysaccharide metabolic proce... | 0.000        |
|         | GO:0016049 | cell growth                                 | 0.000        |
|         | GO:0019637 | organophosphate metabolic process           | 0.000        |
|         | GO:0000910 | cytokinesis                                 | 0.000        |
|         | GO:0000271 | polysaccharide biosynthetic process         | 0.000        |
|         | GO:0044042 | glucan metabolic process                    | 0.000        |
|         | GO:0097237 | cellular response to toxic substance        | 0.000        |
|         | GO:0007010 | cytoskeleton organization                   | 0.000        |
|         | GO:0000272 | polysaccharide catabolic process            | 0.000        |
|         | GO:0006073 | cellular glucan metabolic process           | 0.000        |
|         | GO:0006996 | organelle organization                      | 0.000        |
|         | GO:0000281 | mitotic cytokinesis                         | 0.000        |
|         | GO:0009832 | plant-type cell wall biogenesis             | 0.000        |
|         | GO:0009826 | unidimensional cell growth                  | 0.000        |
|         | GO:0048868 | pollen tube development                     | 0.000        |
|         | GO:0022402 | cell cycle process                          | 0.000        |
|         | GO:1901137 | carbohydrate derivative biosynthetic pro... | 0.000        |
|         | GO:0009206 | purine ribonucleoside triphosphate biosy... | 0.000        |
|         | GO:1902600 | proton transmembrane transport              | 0.000        |
|         | GO:0006754 | ATP biosynthetic process                    | 0.000        |
|         | GO:0009156 | ribonucleoside monophosphate biosyntheti... | 0.000        |
|         | GO:0009124 | nucleoside monophosphate biosynthetic pr... | 0.000        |
|         | GO:0034637 | cellular carbohydrate biosynthetic proce... | 0.000        |
|         | GO:0040007 | growth                                      | 0.000        |
|         | GO:0007275 | multicellular organism development          | 0.000        |
|         | GO:0033692 | cellular polysaccharide biosynthetic pro... | 0.000        |
|         | GO:0051273 | beta-glucan metabolic process               | 0.000        |
|         | GO:0000904 | cell morphogenesis involved in different... | 0.000        |
|         | GO:0009165 | nucleotide biosynthetic process             | 0.000        |
|         | GO:0044038 | cell wall macromolecule biosynthetic pro... | 0.000        |
|         | GO:0070589 | cellular component macromolecule biosynt... | 0.000        |
|         | GO:0019318 | hexose metabolic process                    | 0.000        |
|         | GO:0006101 | citrate metabolic process                   | 0.000        |
|         | GO:0090558 | plant epidermis development                 | 0.000        |
|         | GO:0006260 | DNA replication                             | 0.000        |
|         | GO:0009790 | embryo development                          | 0.000        |
|         | GO:0009888 | tissue development                          | 0.000        |

Continued on next page

| GO type | GO ID      | Description                                 | Adj. p-value |
|---------|------------|---------------------------------------------|--------------|
|         | GO:0009791 | post-embryonic development                  | 0.000        |
|         | GO:0006457 | protein folding                             | 0.000        |
|         | GO:0008154 | actin polymerization or depolymerization    | 0.000        |
|         | GO:0000226 | microtubule cytoskeleton organization       | 0.000        |
|         | GO:0044275 | cellular carbohydrate catabolic process     | 0.000        |
|         | GO:0070592 | cell wall polysaccharide biosynthetic pr... | 0.001        |
|         | GO:0044247 | cellular polysaccharide catabolic proces... | 0.001        |
|         | GO:0048278 | vesicle docking                             | 0.001        |
|         | GO:0009699 | phenylpropanoid biosynthetic process        | 0.001        |
|         | GO:0030833 | regulation of actin filament polymerizat... | 0.001        |
|         | GO:0022406 | membrane docking                            | 0.001        |
|         | GO:0140056 | organelle localization by membrane tethe... | 0.001        |
|         | GO:0000003 | reproduction                                | 0.001        |
|         | GO:0006259 | DNA metabolic process                       | 0.001        |
|         | GO:0048193 | Golgi vesicle transport                     | 0.001        |
|         | GO:0010154 | fruit development                           | 0.001        |
|         | GO:0019359 | nicotinamide nucleotide biosynthetic pro... | 0.001        |
|         | GO:0022622 | root system development                     | 0.001        |
|         | GO:0090407 | organophosphate biosynthetic process        | 0.001        |
|         | GO:0006119 | oxidative phosphorylation                   | 0.002        |
|         | GO:0042773 | ATP synthesis coupled electron transport    | 0.002        |
|         | GO:0072350 | tricarboxylic acid metabolic process        | 0.002        |
|         | GO:0090627 | plant epidermal cell differentiation        | 0.002        |
|         | GO:0098754 | detoxification                              | 0.002        |
|         | GO:0009793 | embryo development ending in seed dorman... | 0.002        |
|         | GO:0048731 | system development                          | 0.002        |
|         | GO:0022904 | respiratory electron transport chain        | 0.002        |
|         | GO:0048364 | root development                            | 0.002        |
|         | GO:0051493 | regulation of cytoskeleton organization     | 0.002        |
|         | GO:0022414 | reproductive process                        | 0.002        |
|         | GO:0030154 | cell differentiation                        | 0.002        |
|         | GO:0042737 | drug catabolic process                      | 0.002        |
|         | GO:0010639 | negative regulation of organelle organiz... | 0.002        |
|         | GO:0019363 | pyridine nucleotide biosynthetic process    | 0.002        |
|         | GO:0040029 | regulation of gene expression, epigeneti... | 0.002        |
|         | GO:0042743 | hydrogen peroxide metabolic process         | 0.002        |
|         | GO:0051274 | beta-glucan biosynthetic process            | 0.002        |
|         | GO:0048229 | gametophyte development                     | 0.002        |
|         | GO:0080147 | root hair cell development                  | 0.002        |
|         | GO:0048608 | reproductive structure development          | 0.003        |
|         | GO:0061458 | reproductive system development             | 0.003        |
|         | GO:0072593 | reactive oxygen species metabolic proces... | 0.003        |
|         | GO:1902903 | regulation of supramolecular fiber organ... | 0.003        |
|         | GO:0006884 | cell volume homeostasis                     | 0.003        |
|         | GO:0009932 | cell tip growth                             | 0.003        |
|         | GO:0009992 | cellular water homeostasis                  | 0.003        |
|         | GO:0015791 | polyol transport                            | 0.003        |
|         | GO:0015793 | glycerol transport                          | 0.003        |
|         | GO:0099402 | plant organ development                     | 0.003        |

Continued on next page

| GO type | GO ID      | Description                                 | Adj. p-value |
|---------|------------|---------------------------------------------|--------------|
|         | GO:0006631 | fatty acid metabolic process                | 0.003        |
|         | GO:0006270 | DNA replication initiation                  | 0.004        |
|         | GO:0009251 | glucan catabolic process                    | 0.004        |
|         | GO:0006090 | pyruvate metabolic process                  | 0.004        |
|         | GO:0006891 | intra-Golgi vesicle-mediated transport      | 0.004        |
|         | GO:0006732 | coenzyme metabolic process                  | 0.004        |
|         | GO:0006261 | DNA-dependent DNA replication               | 0.004        |
|         | GO:0051186 | cofactor metabolic process                  | 0.004        |
|         | GO:0009266 | response to temperature stimulus            | 0.004        |
|         | GO:0007015 | actin filament organization                 | 0.004        |
|         | GO:0015672 | monovalent inorganic cation transport       | 0.004        |
|         | GO:0030244 | cellulose biosynthetic process              | 0.004        |
|         | GO:0090626 | plant epidermis morphogenesis               | 0.004        |
|         | GO:0022603 | regulation of anatomical structure morph... | 0.005        |
|         | GO:0030104 | water homeostasis                           | 0.005        |
|         | GO:0072524 | pyridine-containing compound metabolic p... | 0.005        |
|         | GO:0010564 | regulation of cell cycle process            | 0.005        |
|         | GO:0051258 | protein polymerization                      | 0.006        |
|         | GO:0006633 | fatty acid biosynthetic process             | 0.006        |
|         | GO:0042221 | response to chemical                        | 0.006        |
|         | GO:0010103 | stomatal complex morphogenesis              | 0.006        |
|         | GO:0030258 | lipid modification                          | 0.006        |
|         | GO:0006833 | water transport                             | 0.006        |
|         | GO:0042044 | fluid transport                             | 0.006        |
|         | GO:0048469 | cell maturation                             | 0.006        |
|         | GO:0048764 | trichoblast maturation                      | 0.006        |
|         | GO:0048765 | root hair cell differentiation              | 0.006        |
|         | GO:0022604 | regulation of cell morphogenesis            | 0.007        |
|         | GO:0010054 | trichoblast differentiation                 | 0.007        |
|         | GO:0048767 | root hair elongation                        | 0.007        |
|         | GO:0030036 | actin cytoskeleton organization             | 0.007        |
|         | GO:0043254 | regulation of protein complex assembly      | 0.007        |
|         | GO:0019953 | sexual reproduction                         | 0.008        |
|         | GO:0044255 | cellular lipid metabolic process            | 0.008        |
|         | GO:0034404 | nucleobase-containing small molecule bio... | 0.008        |
|         | GO:0044703 | multi-organism reproductive process         | 0.008        |
|         | GO:0072525 | pyridine-containing compound biosyntheti... | 0.008        |
|         | GO:0009250 | glucan biosynthetic process                 | 0.009        |
|         | GO:0009555 | pollen development                          | 0.009        |
|         | GO:0098657 | import into cell                            | 0.009        |
|         | GO:0030029 | actin filament-based process                | 0.010        |
|         | GO:0051716 | cellular response to stimulus               | 0.010        |
|         | GO:0015850 | organic hydroxy compound transport          | 0.010        |
|         | GO:0030838 | positive regulation of actin filament po... | 0.010        |
|         | GO:0045010 | actin nucleation                            | 0.010        |
|         | GO:0016053 | organic acid biosynthetic process           | 0.011        |
|         | GO:0046394 | carboxylic acid biosynthetic process        | 0.011        |
|         | GO:0045493 | xylan catabolic process                     | 0.012        |
|         | GO:0046185 | aldehyde catabolic process                  | 0.012        |

Continued on next page

| GO type | GO ID      | Description                                 | Adj. p-value |
|---------|------------|---------------------------------------------|--------------|
|         | GO:0032271 | regulation of protein polymerization        | 0.012        |
|         | GO:0009698 | phenylpropanoid metabolic process           | 0.012        |
|         | GO:0046486 | glycerolipid metabolic process              | 0.013        |
|         | GO:0006897 | endocytosis                                 | 0.013        |
|         | GO:0051276 | chromosome organization                     | 0.013        |
|         | GO:0044283 | small molecule biosynthetic process         | 0.014        |
|         | GO:0008361 | regulation of cell size                     | 0.014        |
|         | GO:0021700 | developmental maturation                    | 0.015        |
|         | GO:0009934 | regulation of meristem structural organi... | 0.015        |
|         | GO:0090698 | post-embryonic plant morphogenesis          | 0.015        |
|         | GO:0005982 | starch metabolic process                    | 0.015        |
|         | GO:0010374 | stomatal complex development                | 0.015        |
|         | GO:0005984 | disaccharide metabolic process              | 0.016        |
|         | GO:0061077 | chaperone-mediated protein folding          | 0.017        |
|         | GO:0044839 | cell cycle G2/M phase transition            | 0.019        |
|         | GO:0015766 | disaccharide transport                      | 0.019        |
|         | GO:0015770 | sucrose transport                           | 0.019        |
|         | GO:0015772 | oligosaccharide transport                   | 0.019        |
|         | GO:0045492 | xylan biosynthetic process                  | 0.019        |
|         | GO:0048825 | cotyledon development                       | 0.020        |
|         | GO:0006650 | glycerophospholipid metabolic process       | 0.021        |
|         | GO:0010038 | response to metal ion                       | 0.021        |
|         | GO:0006979 | response to oxidative stress                | 0.022        |
|         | GO:0010053 | root epidermal cell differentiation         | 0.022        |
|         | GO:0006006 | glucose metabolic process                   | 0.023        |
|         | GO:0009628 | response to abiotic stimulus                | 0.023        |
|         | GO:0052546 | cell wall pectin metabolic process          | 0.023        |
|         | GO:1903338 | regulation of cell wall organization or ... | 0.023        |
|         | GO:0043647 | inositol phosphate metabolic process        | 0.024        |
|         | GO:0046854 | phosphatidylinositol phosphorylation        | 0.024        |
|         | GO:0006986 | response to unfolded protein                | 0.024        |
|         | GO:0009108 | coenzyme biosynthetic process               | 0.024        |
|         | GO:0065008 | regulation of biological quality            | 0.026        |
|         | GO:0006284 | base-excision repair                        | 0.026        |
|         | GO:0098660 | inorganic ion transmembrane transport       | 0.026        |
|         | GO:0006904 | vesicle docking involved in exocytosis      | 0.026        |
|         | GO:0010026 | trichome differentiation                    | 0.026        |
|         | GO:0140029 | exocytic process                            | 0.026        |
|         | GO:0009225 | nucleotide-sugar metabolic process          | 0.027        |
|         | GO:0044770 | cell cycle phase transition                 | 0.027        |
|         | GO:1905392 | plant organ morphogenesis                   | 0.028        |
|         | GO:2001251 | negative regulation of chromosome organi... | 0.029        |
|         | GO:0051640 | organelle localization                      | 0.029        |
|         | GO:0031122 | cytoplasmic microtubule organization        | 0.030        |
|         | GO:0032504 | multicellular organism reproduction         | 0.031        |
|         | GO:0007030 | Golgi organization                          | 0.031        |
|         | GO:0071695 | anatomical structure maturation             | 0.031        |
|         | GO:0033554 | cellular response to stress                 | 0.031        |
|         | GO:0006207 | 'de novo' pyrimidine nucleobase biosynth... | 0.032        |

Continued on next page

| GO type | GO ID      | Description                                 | Adj. p-value |
|---------|------------|---------------------------------------------|--------------|
|         | GO:0010876 | lipid localization                          | 0.034        |
|         | GO:0046686 | response to cadmium ion                     | 0.034        |
|         | GO:0048826 | cotyledon morphogenesis                     | 0.034        |
|         | GO:0015985 | energy coupled proton transport, down el... | 0.034        |
|         | GO:0015986 | ATP synthesis coupled proton transport      | 0.034        |
|         | GO:0042542 | response to hydrogen peroxide               | 0.035        |
|         | GO:0051235 | maintenance of location                     | 0.035        |
|         | GO:0051275 | beta-glucan catabolic process               | 0.037        |
|         | GO:0042545 | cell wall modification                      | 0.037        |
|         | GO:0010035 | response to inorganic substance             | 0.037        |
|         | GO:0007264 | small GTPase mediated signal transductio... | 0.039        |
|         | GO:0006644 | phospholipid metabolic process              | 0.039        |
|         | GO:0034968 | histone lysine methylation                  | 0.039        |
|         | GO:0030245 | cellulose catabolic process                 | 0.039        |
|         | GO:0051510 | regulation of unidimensional cell growth    | 0.039        |
|         | GO:0006310 | DNA recombination                           | 0.040        |
|         | GO:0051726 | regulation of cell cycle                    | 0.041        |
|         | GO:0045490 | pectin catabolic process                    | 0.041        |
|         | GO:0055082 | cellular chemical homeostasis               | 0.043        |
|         | GO:0042180 | cellular ketone metabolic process           | 0.043        |
|         | GO:0016042 | lipid catabolic process                     | 0.044        |
|         | GO:0046835 | carbohydrate phosphorylation                | 0.045        |
|         | GO:0042592 | homeostatic process                         | 0.046        |
|         | GO:0030004 | cellular monovalent inorganic cation hom... | 0.046        |
|         | GO:0000086 | G2/M transition of mitotic cell cycle       | 0.048        |
|         | GO:0034220 | ion transmembrane transport                 | 0.048        |
|         | GO:1901661 | quinone metabolic process                   | 0.048        |
|         | GO:1901663 | quinone biosynthetic process                | 0.048        |
|         | GO:1902749 | regulation of cell cycle G2/M phase tran... | 0.048        |
|         | GO:0046834 | lipid phosphorylation                       | 0.051        |
|         | GO:0005983 | starch catabolic process                    | 0.053        |
|         | GO:0055046 | microgametogenesis                          | 0.053        |
|         | GO:0009629 | response to gravity                         | 0.053        |
|         | GO:1905268 | negative regulation of chromatin organiz... | 0.054        |
|         | GO:0048598 | embryonic morphogenesis                     | 0.055        |
|         | GO:0035966 | response to topologically incorrect prot... | 0.056        |
|         | GO:0030641 | regulation of cellular pH                   | 0.056        |
|         | GO:0043244 | regulation of protein complex disassembl... | 0.056        |
|         | GO:0051453 | regulation of intracellular pH              | 0.056        |
|         | GO:0071103 | DNA conformation change                     | 0.057        |
|         | GO:0044087 | regulation of cellular component biogene... | 0.057        |
|         | GO:0098662 | inorganic cation transmembrane transport    | 0.058        |
|         | GO:0019321 | pentose metabolic process                   | 0.060        |
|         | GO:0046470 | phosphatidylcholine metabolic process       | 0.061        |
|         | GO:0031109 | microtubule polymerization or depolymeri... | 0.061        |
|         | GO:0019751 | polyol metabolic process                    | 0.063        |
|         | GO:0006458 | 'de novo' protein folding                   | 0.064        |
|         | GO:0051084 | 'de novo' posttranslational protein fold... | 0.064        |
|         | GO:0032392 | DNA geometric change                        | 0.064        |

Continued on next page

| GO type | GO ID      | Description                                   | Adj. p-value |
|---------|------------|-----------------------------------------------|--------------|
|         | GO:0032508 | DNA duplex unwinding                          | 0.064        |
|         | GO:0009438 | methylglyoxal metabolic process               | 0.070        |
|         | GO:0042182 | ketone catabolic process                      | 0.070        |
|         | GO:0051596 | methylglyoxal catabolic process               | 0.070        |
|         | GO:0055067 | monovalent inorganic cation homeostasis       | 0.070        |
|         | GO:0018022 | peptidyl-lysine methylation                   | 0.070        |
|         | GO:0000280 | nuclear division                              | 0.072        |
|         | GO:0010191 | mucilage metabolic process                    | 0.072        |
|         | GO:0044772 | mitotic cell cycle phase transition           | 0.072        |
|         | GO:0019915 | lipid storage                                 | 0.076        |
|         | GO:0051085 | chaperone cofactor-dependent protein ref...   | 0.076        |
|         | GO:0034976 | response to endoplasmic reticulum stress      | 0.077        |
|         | GO:0008356 | asymmetric cell division                      | 0.077        |
|         | GO:0051651 | maintenance of location in cell               | 0.077        |
|         | GO:0006970 | response to osmotic stress                    | 0.078        |
|         | GO:0051495 | positive regulation of cytoskeleton orga...   | 0.079        |
|         | GO:1902905 | positive regulation of supramolecular fi...   | 0.079        |
|         | GO:0032787 | monocarboxylic acid metabolic process         | 0.080        |
|         | GO:0009630 | gravitropism                                  | 0.081        |
|         | GO:0018208 | peptidyl-proline modification                 | 0.082        |
|         | GO:0019566 | arabinose metabolic process                   | 0.082        |
|         | GO:0043622 | cortical microtubule organization             | 0.085        |
|         | GO:0010015 | root morphogenesis                            | 0.088        |
|         | GO:0018105 | peptidyl-serine phosphorylation               | 0.089        |
|         | GO:0043547 | positive regulation of GTPase activity        | 0.089        |
|         | GO:0006075 | (1- $\beta$ )-D-glucan biosynthetic proces... | 0.091        |
|         | GO:0044786 | cell cycle DNA replication                    | 0.091        |
|         | GO:0042181 | ketone biosynthetic process                   | 0.091        |
|         | GO:0010215 | cellulose microfibril organization            | 0.096        |
|         | GO:0044282 | small molecule catabolic process              | 0.098        |
|         | GO:0006812 | cation transport                              | 0.099        |
|         | GO:0008202 | steroid metabolic process                     | 0.099        |
|         | GO:0044089 | positive regulation of cellular componen...   | 0.099        |
|         | GO:0048609 | multicellular organismal reproductive pr...   | 0.100        |
|         | GO:0044430 | cytoskeletal part                             | 0.000        |
|         | GO:0012505 | endomembrane system                           | 0.000        |
|         | GO:0044431 | Golgi apparatus part                          | 0.000        |
|         | GO:0016020 | membrane                                      | 0.000        |
|         | GO:0033176 | proton-transporting V-type ATPase comple...   | 0.000        |
|         | GO:0005773 | vacuole                                       | 0.000        |
|         | GO:0033178 | proton-transporting two-sector ATPase co...   | 0.000        |
|         | GO:0005886 | plasma membrane                               | 0.000        |
|         | GO:0031410 | cytoplasmic vesicle                           | 0.000        |
|         | GO:0005819 | spindle                                       | 0.000        |
|         | GO:0044427 | chromosomal part                              | 0.000        |
|         | GO:0030662 | coated vesicle membrane                       | 0.000        |
|         | GO:0012506 | vesicle membrane                              | 0.001        |
|         | GO:0044425 | membrane part                                 | 0.001        |
|         | GO:0005876 | spindle microtubule                           | 0.001        |

Continued on next page

| GO type | GO ID      | Description                                 | Adj. p-value |
|---------|------------|---------------------------------------------|--------------|
|         | GO:0000775 | chromosome, centromeric region              | 0.002        |
|         | GO:0030863 | cortical cytoskeleton                       | 0.002        |
|         | GO:0030981 | cortical microtubule cytoskeleton           | 0.002        |
|         | GO:0009504 | cell plate                                  | 0.002        |
|         | GO:0055028 | cortical microtubule                        | 0.003        |
|         | GO:0044433 | cytoplasmic vesicle part                    | 0.003        |
|         | GO:0005881 | cytoplasmic microtubule                     | 0.004        |
|         | GO:0030660 | Golgi-associated vesicle membrane           | 0.004        |
|         | GO:0030133 | transport vesicle                           | 0.009        |
|         | GO:0009705 | plant-type vacuole membrane                 | 0.010        |
|         | GO:0005753 | mitochondrial proton-transporting ATP sy... | 0.011        |
|         | GO:0005768 | endosome                                    | 0.011        |
|         | GO:0015629 | actin cytoskeleton                          | 0.011        |
|         | GO:0031224 | intrinsic component of membrane             | 0.014        |
|         | GO:0030658 | transport vesicle membrane                  | 0.015        |
|         | GO:0009574 | preprophase band                            | 0.020        |
|         | GO:0042575 | DNA polymerase complex                      | 0.020        |
|         | GO:0005769 | early endosome                              | 0.024        |
|         | GO:0000325 | plant-type vacuole                          | 0.031        |
|         | GO:0033177 | proton-transporting two-sector ATPase co... | 0.043        |
|         | GO:0044454 | nuclear chromosome part                     | 0.051        |
|         | GO:0005657 | replication fork                            | 0.053        |
|         | GO:0005811 | lipid droplet                               | 0.053        |
|         | GO:0000228 | nuclear chromosome                          | 0.060        |
|         | GO:0000148 | 1,3-beta-D-glucan synthase complex          | 0.062        |
|         | GO:0098687 | chromosomal region                          | 0.071        |
|         | GO:0000793 | condensed chromosome                        | 0.088        |
|         | GO:0030134 | COPII-coated ER to Golgi transport vesic... | 0.090        |
|         | GO:0003824 | catalytic activity                          | 0.000        |
|         | GO:0016787 | hydrolase activity                          | 0.000        |
|         | GO:0015925 | galactosidase activity                      | 0.000        |
|         | GO:0016887 | ATPase activity                             | 0.001        |
|         | GO:0140097 | catalytic activity, acting on DNA           | 0.002        |
|         | GO:0008374 | O-acyltransferase activity                  | 0.003        |
|         | GO:0004567 | beta-mannosidase activity                   | 0.003        |
|         | GO:0016757 | transferase activity, transferring glyco... | 0.004        |
|         | GO:0005372 | water transmembrane transporter activity    | 0.004        |
|         | GO:0015250 | water channel activity                      | 0.004        |
|         | GO:0015254 | glycerol channel activity                   | 0.004        |
|         | GO:0005524 | ATP binding                                 | 0.004        |
|         | GO:0008144 | drug binding                                | 0.005        |
|         | GO:0008289 | lipid binding                               | 0.005        |
|         | GO:0003954 | NADH dehydrogenase activity                 | 0.005        |
|         | GO:1901618 | organic hydroxy compound transmembrane t... | 0.005        |
|         | GO:0015166 | polyol transmembrane transporter activit... | 0.005        |
|         | GO:0015168 | glycerol transmembrane transporter activ... | 0.006        |
|         | GO:0016903 | oxidoreductase activity, acting on the a... | 0.008        |
|         | GO:0003678 | DNA helicase activity                       | 0.009        |
|         | GO:0035639 | purine ribonucleoside triphosphate bindi... | 0.009        |

Continued on next page



| GO type | GO ID      | Description                                 | Adj. p-value |
|---------|------------|---------------------------------------------|--------------|
|         | GO:0015078 | proton transmembrane transporter activit... | 0.010        |
|         | GO:0016307 | phosphatidylinositol phosphate kinase ac... | 0.010        |
|         | GO:0016620 | oxidoreductase activity, acting on the a... | 0.010        |
|         | GO:0030554 | adenyl nucleotide binding                   | 0.010        |
|         | GO:0043168 | anion binding                               | 0.010        |
|         | GO:0051020 | GTPase binding                              | 0.010        |
|         | GO:0051087 | chaperone binding                           | 0.010        |
|         | GO:1901681 | sulfur compound binding                     | 0.010        |
|         | GO:0032559 | adenyl ribonucleotide binding               | 0.010        |
|         | GO:0008146 | sulfotransferase activity                   | 0.012        |
|         | GO:0009044 | xylan 1,4-beta-xylosidase activity          | 0.013        |
|         | GO:0097599 | xylanase activity                           | 0.013        |
|         | GO:0015077 | monovalent inorganic cation transmembran... | 0.013        |
|         | GO:0008047 | enzyme activator activity                   | 0.014        |
|         | GO:0005085 | guanyl-nucleotide exchange factor activi... | 0.015        |
|         | GO:0009055 | electron transfer activity                  | 0.015        |
|         | GO:0015926 | glucosidase activity                        | 0.015        |
|         | GO:0018024 | histone-lysine N-methyltransferase activ... | 0.016        |
|         | GO:0045330 | aspartyl esterase activity                  | 0.016        |
|         | GO:0008422 | beta-glucosidase activity                   | 0.016        |
|         | GO:0017076 | purine nucleotide binding                   | 0.016        |
|         | GO:0032555 | purine ribonucleotide binding               | 0.018        |
|         | GO:0004650 | polygalacturonase activity                  | 0.018        |
|         | GO:0005088 | Ras guanyl-nucleotide exchange factor ac... | 0.020        |
|         | GO:0097367 | carbohydrate derivative binding             | 0.021        |
|         | GO:0032553 | ribonucleotide binding                      | 0.023        |
|         | GO:0003993 | acid phosphatase activity                   | 0.027        |
|         | GO:0015154 | disaccharide transmembrane transporter a... | 0.027        |
|         | GO:0015157 | oligosaccharide transmembrane transporte... | 0.027        |
|         | GO:0016853 | isomerase activity                          | 0.027        |
|         | GO:0016788 | hydrolase activity, acting on ester bond... | 0.035        |
|         | GO:0016615 | malate dehydrogenase activity               | 0.035        |
|         | GO:0000287 | magnesium ion binding                       | 0.036        |
|         | GO:0060589 | nucleoside-triphosphatase regulator acti... | 0.039        |
|         | GO:0019783 | ubiquitin-like protein-specific protease... | 0.042        |
|         | GO:0030599 | pectinesterase activity                     | 0.042        |
|         | GO:0005200 | structural constituent of cytoskeleton      | 0.042        |
|         | GO:0019104 | DNA N-glycosylase activity                  | 0.042        |
|         | GO:0042578 | phosphoric ester hydrolase activity         | 0.043        |
|         | GO:0016774 | phosphotransferase activity, carboxyl gr... | 0.043        |
|         | GO:0046933 | proton-transporting ATP synthase activit... | 0.043        |
|         | GO:0008378 | galactosyltransferase activity              | 0.044        |
|         | GO:0016759 | cellulose synthase activity                 | 0.047        |
|         | GO:0016760 | cellulose synthase (UDP-forming) activit... | 0.047        |
|         | GO:0022838 | substrate-specific channel activity         | 0.047        |
|         | GO:0015267 | channel activity                            | 0.050        |
|         | GO:0022803 | passive transmembrane transporter activi... | 0.050        |
|         | GO:0016758 | transferase activity, transferring hexos... | 0.051        |
|         | GO:0015318 | inorganic molecular entity transmembrane... | 0.056        |

Continued on next page

| GO type | GO ID      | Description                                 | Adj. p-value |
|---------|------------|---------------------------------------------|--------------|
|         | GO:0015144 | carbohydrate transmembrane transporter a... | 0.059        |
|         | GO:0051082 | unfolded protein binding                    | 0.061        |
|         | GO:0019200 | carbohydrate kinase activity                | 0.065        |
|         | GO:0016746 | transferase activity, transferring acyl ... | 0.065        |
|         | GO:0017016 | Ras GTPase binding                          | 0.067        |
|         | GO:0031267 | small GTPase binding                        | 0.067        |
|         | GO:0051539 | 4 iron, 4 sulfur cluster binding            | 0.067        |
|         | GO:0051015 | actin filament binding                      | 0.072        |
|         | GO:0008810 | cellulase activity                          | 0.077        |
|         | GO:0005543 | phospholipid binding                        | 0.077        |
|         | GO:0016747 | transferase activity, transferring acyl ... | 0.077        |
|         | GO:0003843 | 1,3-beta-D-glucan synthase activity         | 0.079        |
|         | GO:0042054 | histone methyltransferase activity          | 0.083        |
|         | GO:0070569 | uridylyltransferase activity                | 0.084        |
|         | GO:0005527 | macrolide binding                           | 0.086        |
|         | GO:0005528 | FK506 binding                               | 0.086        |
|         | GO:0016857 | racemase and epimerase activity, acting ... | 0.086        |
|         | GO:0004029 | aldehyde dehydrogenase (NAD) activity       | 0.087        |
|         | GO:0016417 | S-acyltransferase activity                  | 0.092        |
|         | GO:0008443 | phosphofructokinase activity                | 0.093        |
|         | GO:0043138 | 3'-5' DNA helicase activity                 | 0.093        |
|         | GO:0003755 | peptidyl-prolyl cis-trans isomerase acti... | 0.096        |

## 4.4 Root Postflowering clusters

### 4.4.1 Root - Postflowering - Cluster 1

| GO type | GO ID      | Description                                 | Adj. p-value |
|---------|------------|---------------------------------------------|--------------|
|         | GO:0009266 | response to temperature stimulus            | 0.000        |
|         | GO:0003006 | developmental process involved in reprod... | 0.000        |
|         | GO:0009642 | response to light intensity                 | 0.000        |
|         | GO:0016071 | mRNA metabolic process                      | 0.000        |
|         | GO:0048608 | reproductive structure development          | 0.000        |
|         | GO:0008380 | RNA splicing                                | 0.000        |
|         | GO:0019637 | organophosphate metabolic process           | 0.000        |
|         | GO:0010154 | fruit development                           | 0.000        |
|         | GO:0046034 | ATP metabolic process                       | 0.001        |
|         | GO:0005982 | starch metabolic process                    | 0.001        |
|         | GO:0006397 | mRNA processing                             | 0.001        |
|         | GO:0048316 | seed development                            | 0.001        |
|         | GO:0006970 | response to osmotic stress                  | 0.001        |
|         | GO:0007034 | vacuolar transport                          | 0.001        |
|         | GO:0061077 | chaperone-mediated protein folding          | 0.001        |
|         | GO:0030258 | lipid modification                          | 0.001        |
|         | GO:0033365 | protein localization to organelle           | 0.001        |
|         | GO:0000398 | mRNA splicing, via spliceosome              | 0.002        |
|         | GO:0009141 | nucleoside triphosphate metabolic proces... | 0.003        |
|         | GO:0009416 | response to light stimulus                  | 0.003        |
|         | GO:0072594 | establishment of protein localization to... | 0.003        |
|         | GO:0034440 | lipid oxidation                             | 0.003        |
|         | GO:0050896 | response to stimulus                        | 0.004        |
|         | GO:0090351 | seedling development                        | 0.004        |
|         | GO:0000413 | protein peptidyl-prolyl isomerization       | 0.004        |
|         | GO:0000184 | nuclear-transcribed mRNA catabolic proce... | 0.004        |
|         | GO:0006623 | protein targeting to vacuole                | 0.004        |
|         | GO:0009081 | branched-chain amino acid metabolic proc... | 0.004        |
|         | GO:0009117 | nucleotide metabolic process                | 0.004        |
|         | GO:0006629 | lipid metabolic process                     | 0.004        |
|         | GO:0034599 | cellular response to oxidative stress       | 0.004        |
|         | GO:0044282 | small molecule catabolic process            | 0.004        |
|         | GO:0009260 | ribonucleotide biosynthetic process         | 0.005        |
|         | GO:0046390 | ribose phosphate biosynthetic process       | 0.005        |
|         | GO:0006753 | nucleoside phosphate metabolic process      | 0.005        |
|         | GO:0015672 | monovalent inorganic cation transport       | 0.005        |
|         | GO:0005983 | starch catabolic process                    | 0.006        |
|         | GO:0009124 | nucleoside monophosphate biosynthetic pr... | 0.006        |
|         | GO:0006551 | leucine metabolic process                   | 0.006        |
|         | GO:0007033 | vacuole organization                        | 0.006        |
|         | GO:0006206 | pyrimidine nucleobase metabolic process     | 0.006        |
|         | GO:0009156 | ribonucleoside monophosphate biosyntheti... | 0.006        |
|         | GO:0010256 | endomembrane system organization            | 0.007        |
|         | GO:0006892 | post-Golgi vesicle-mediated transport       | 0.007        |
|         | GO:0044270 | cellular nitrogen compound catabolic pro... | 0.007        |

Continued on next page

| GO type | GO ID      | Description                                 | Adj. p-value |
|---------|------------|---------------------------------------------|--------------|
|         | GO:0046700 | heterocycle catabolic process               | 0.007        |
|         | GO:0072666 | establishment of protein localization to... | 0.008        |
|         | GO:0048868 | pollen tube development                     | 0.008        |
|         | GO:0009845 | seed germination                            | 0.008        |
|         | GO:0044255 | cellular lipid metabolic process            | 0.009        |
|         | GO:0051085 | chaperone cofactor-dependent protein ref... | 0.009        |
|         | GO:0022411 | cellular component disassembly              | 0.010        |
|         | GO:0019395 | fatty acid oxidation                        | 0.011        |
|         | GO:0009062 | fatty acid catabolic process                | 0.011        |
|         | GO:0009127 | purine nucleoside monophosphate biosynth... | 0.011        |
|         | GO:0009168 | purine ribonucleoside monophosphate bios... | 0.011        |
|         | GO:0030091 | protein repair                              | 0.011        |
|         | GO:0006089 | lactate metabolic process                   | 0.011        |
|         | GO:0019243 | methylglyoxal catabolic process to D-lac... | 0.011        |
|         | GO:0061727 | methylglyoxal catabolic process to lacta... | 0.011        |
|         | GO:0046185 | aldehyde catabolic process                  | 0.012        |
|         | GO:0090407 | organophosphate biosynthetic process        | 0.013        |
|         | GO:0006635 | fatty acid beta-oxidation                   | 0.013        |
|         | GO:0009201 | ribonucleoside triphosphate biosynthetic... | 0.013        |
|         | GO:0016052 | carbohydrate catabolic process              | 0.015        |
|         | GO:0009145 | purine nucleoside triphosphate biosynthe... | 0.015        |
|         | GO:0009206 | purine ribonucleoside triphosphate biosy... | 0.015        |
|         | GO:0044247 | cellular polysaccharide catabolic proces... | 0.015        |
|         | GO:0072521 | purine-containing compound metabolic pro... | 0.016        |
|         | GO:0009152 | purine ribonucleotide biosynthetic proce... | 0.016        |
|         | GO:0072329 | monocarboxylic acid catabolic process       | 0.017        |
|         | GO:0009860 | pollen tube growth                          | 0.017        |
|         | GO:0006754 | ATP biosynthetic process                    | 0.017        |
|         | GO:0009409 | response to cold                            | 0.017        |
|         | GO:1901700 | response to oxygen-containing compound      | 0.017        |
|         | GO:0006631 | fatty acid metabolic process                | 0.018        |
|         | GO:0043484 | regulation of RNA splicing                  | 0.018        |
|         | GO:0043624 | cellular protein complex disassembly        | 0.019        |
|         | GO:0072528 | pyrimidine-containing compound biosynthe... | 0.019        |
|         | GO:0009932 | cell tip growth                             | 0.019        |
|         | GO:1901661 | quinone metabolic process                   | 0.020        |
|         | GO:1901663 | quinone biosynthetic process                | 0.020        |
|         | GO:0034655 | nucleobase-containing compound catabolic... | 0.020        |
|         | GO:0006401 | RNA catabolic process                       | 0.021        |
|         | GO:0006402 | mRNA catabolic process                      | 0.021        |
|         | GO:0009142 | nucleoside triphosphate biosynthetic pro... | 0.021        |
|         | GO:0051179 | localization                                | 0.023        |
|         | GO:0008154 | actin polymerization or depolymerization    | 0.023        |
|         | GO:0019856 | pyrimidine nucleobase biosynthetic proce... | 0.023        |
|         | GO:0016054 | organic acid catabolic process              | 0.024        |
|         | GO:0046395 | carboxylic acid catabolic process           | 0.024        |
|         | GO:0051261 | protein depolymerization                    | 0.024        |
|         | GO:0033993 | response to lipid                           | 0.024        |
|         | GO:0006164 | purine nucleotide biosynthetic process      | 0.024        |

Continued on next page

| GO type | GO ID      | Description                                 | Adj. p-value |
|---------|------------|---------------------------------------------|--------------|
|         | GO:0006810 | transport                                   | 0.024        |
|         | GO:0009438 | methylglyoxal metabolic process             | 0.024        |
|         | GO:0042182 | ketone catabolic process                    | 0.024        |
|         | GO:0051596 | methylglyoxal catabolic process             | 0.024        |
|         | GO:0006458 | 'de novo' protein folding                   | 0.026        |
|         | GO:0051084 | 'de novo' posttranslational protein fold... | 0.026        |
|         | GO:0097305 | response to alcohol                         | 0.026        |
|         | GO:0051234 | establishment of localization               | 0.026        |
|         | GO:0042181 | ketone biosynthetic process                 | 0.027        |
|         | GO:0009165 | nucleotide biosynthetic process             | 0.028        |
|         | GO:0034614 | cellular response to reactive oxygen spe... | 0.029        |
|         | GO:0006012 | galactose metabolic process                 | 0.029        |
|         | GO:0006896 | Golgi to vacuole transport                  | 0.029        |
|         | GO:1901293 | nucleoside phosphate biosynthetic proces... | 0.029        |
|         | GO:0008064 | regulation of actin polymerization or de... | 0.032        |
|         | GO:0030832 | regulation of actin filament length         | 0.032        |
|         | GO:0032956 | regulation of actin cytoskeleton organiz... | 0.032        |
|         | GO:0032970 | regulation of actin filament-based proce... | 0.032        |
|         | GO:0045037 | protein import into chloroplast stroma      | 0.032        |
|         | GO:0046486 | glycerolipid metabolic process              | 0.032        |
|         | GO:0061025 | membrane fusion                             | 0.032        |
|         | GO:0110053 | regulation of actin filament organizatio... | 0.032        |
|         | GO:0006733 | oxidoreduction coenzyme metabolic proces... | 0.033        |
|         | GO:0032984 | protein-containing complex disassembly      | 0.034        |
|         | GO:0009651 | response to salt stress                     | 0.034        |
|         | GO:0006207 | 'de novo' pyrimidine nucleobase biosynth... | 0.035        |
|         | GO:0090174 | organelle membrane fusion                   | 0.035        |
|         | GO:0006644 | phospholipid metabolic process              | 0.035        |
|         | GO:0042221 | response to chemical                        | 0.035        |
|         | GO:0044281 | small molecule metabolic process            | 0.036        |
|         | GO:0009908 | flower development                          | 0.038        |
|         | GO:0009737 | response to abscisic acid                   | 0.040        |
|         | GO:0001101 | response to acid chemical                   | 0.041        |
|         | GO:0006972 | hyperosmotic response                       | 0.042        |
|         | GO:0034404 | nucleobase-containing small molecule bio... | 0.042        |
|         | GO:0055086 | nucleobase-containing small molecule met... | 0.043        |
|         | GO:0030041 | actin filament polymerization               | 0.045        |
|         | GO:0030833 | regulation of actin filament polymerizat... | 0.045        |
|         | GO:0008643 | carbohydrate transport                      | 0.048        |
|         | GO:0044275 | cellular carbohydrate catabolic process     | 0.051        |
|         | GO:1901135 | carbohydrate derivative metabolic proces... | 0.051        |
|         | GO:0072527 | pyrimidine-containing compound metabolic... | 0.051        |
|         | GO:0051493 | regulation of cytoskeleton organization     | 0.053        |
|         | GO:0006906 | vesicle fusion                              | 0.054        |
|         | GO:0006108 | malate metabolic process                    | 0.055        |
|         | GO:0048284 | organelle fusion                            | 0.055        |
|         | GO:0009064 | glutamine family amino acid metabolic pr... | 0.057        |
|         | GO:0042335 | cuticle development                         | 0.058        |
|         | GO:0009063 | cellular amino acid catabolic process       | 0.060        |

Continued on next page

| GO type | GO ID      | Description                                 | Adj. p-value |
|---------|------------|---------------------------------------------|--------------|
|         | GO:0046488 | phosphatidylinositol metabolic process      | 0.061        |
|         | GO:0006560 | proline metabolic process                   | 0.062        |
|         | GO:0046434 | organophosphate catabolic process           | 0.063        |
|         | GO:0090567 | reproductive shoot system development       | 0.065        |
|         | GO:0006650 | glycerophospholipid metabolic process       | 0.068        |
|         | GO:0006090 | pyruvate metabolic process                  | 0.070        |
|         | GO:0048468 | cell development                            | 0.071        |
|         | GO:0000904 | cell morphogenesis involved in different... | 0.072        |
|         | GO:1902903 | regulation of supramolecular fiber organ... | 0.073        |
|         | GO:1900140 | regulation of seedling development          | 0.075        |
|         | GO:1901575 | organic substance catabolic process         | 0.075        |
|         | GO:0006743 | ubiquinone metabolic process                | 0.077        |
|         | GO:0006744 | ubiquinone biosynthetic process             | 0.077        |
|         | GO:0051188 | cofactor biosynthetic process               | 0.078        |
|         | GO:0046496 | nicotinamide nucleotide metabolic proces... | 0.079        |
|         | GO:0048443 | stamen development                          | 0.079        |
|         | GO:0048466 | androecium development                      | 0.079        |
|         | GO:0044242 | cellular lipid catabolic process            | 0.080        |
|         | GO:0046854 | phosphatidylinositol phosphorylation        | 0.083        |
|         | GO:0046365 | monosaccharide catabolic process            | 0.085        |
|         | GO:0019362 | pyridine nucleotide metabolic process       | 0.085        |
|         | GO:0019359 | nicotinamide nucleotide biosynthetic pro... | 0.087        |
|         | GO:0072598 | protein localization to chloroplast         | 0.089        |
|         | GO:0031338 | regulation of vesicle fusion                | 0.090        |
|         | GO:1901606 | alpha-amino acid catabolic process          | 0.090        |
|         | GO:0033043 | regulation of organelle organization        | 0.090        |
|         | GO:0055046 | microgametogenesis                          | 0.092        |
|         | GO:0043244 | regulation of protein complex disassembl... | 0.093        |
|         | GO:0072524 | pyridine-containing compound metabolic p... | 0.093        |
|         | GO:0000956 | nuclear-transcribed mRNA catabolic proce... | 0.095        |
|         | GO:0098660 | inorganic ion transmembrane transport       | 0.095        |
|         | GO:0042180 | cellular ketone metabolic process           | 0.097        |
|         | GO:0019674 | NAD metabolic process                       | 0.097        |
|         | GO:0010029 | regulation of seed germination              | 0.100        |
|         | GO:0009536 | plastid                                     | 0.000        |
|         | GO:0009579 | thylakoid                                   | 0.000        |
|         | GO:0009532 | plastid stroma                              | 0.000        |
|         | GO:0005746 | mitochondrial respiratory chain             | 0.000        |
|         | GO:0098803 | respiratory chain complex                   | 0.000        |
|         | GO:0031977 | thylakoid lumen                             | 0.000        |
|         | GO:0016469 | proton-transporting two-sector ATPase co... | 0.000        |
|         | GO:0005773 | vacuole                                     | 0.000        |
|         | GO:0044437 | vacuolar part                               | 0.000        |
|         | GO:0033178 | proton-transporting two-sector ATPase co... | 0.000        |
|         | GO:0019898 | extrinsic component of membrane             | 0.001        |
| CC      | GO:0042170 | plastid membrane                            | 0.001        |
|         | GO:0009528 | plastid inner membrane                      | 0.002        |
|         | GO:0031969 | chloroplast membrane                        | 0.003        |
|         | GO:0009706 | chloroplast inner membrane                  | 0.010        |

Continued on next page

| GO type | GO ID      | Description                                 | Adj. p-value |
|---------|------------|---------------------------------------------|--------------|
|         | GO:0030135 | coated vesicle                              | 0.013        |
|         | GO:0005681 | spliceosomal complex                        | 0.013        |
|         | GO:0070069 | cytochrome complex                          | 0.016        |
|         | GO:0031968 | organelle outer membrane                    | 0.021        |
|         | GO:0000325 | plant-type vacuole                          | 0.031        |
|         | GO:0009705 | plant-type vacuole membrane                 | 0.041        |
|         | GO:0005684 | U2-type spliceosomal complex                | 0.053        |
|         | GO:0048046 | apoplast                                    | 0.068        |
|         | GO:0044769 | ATPase activity, coupled to transmembran... | 0.000        |
|         | GO:0003713 | transcription coactivator activity          | 0.007        |
|         | GO:0003755 | peptidyl-prolyl cis-trans isomerase acti... | 0.009        |
|         | GO:0016859 | cis-trans isomerase activity                | 0.009        |
|         | GO:0008047 | enzyme activator activity                   | 0.011        |
|         | GO:0003954 | NADH dehydrogenase activity                 | 0.011        |
|         | GO:0051087 | chaperone binding                           | 0.011        |
|         | GO:0016874 | ligase activity                             | 0.011        |
|         | GO:0003779 | actin binding                               | 0.015        |
|         | GO:0008092 | cytoskeletal protein binding                | 0.016        |
|         | GO:0051539 | 4 iron, 4 sulfur cluster binding            | 0.016        |
|         | GO:2001070 | starch binding                              | 0.016        |
|         | GO:0019829 | cation-transporting ATPase activity         | 0.019        |
|         | GO:0022853 | active ion transmembrane transporter act... | 0.019        |
|         | GO:0042625 | ATPase coupled ion transmembrane transpo... | 0.019        |
|         | GO:0004553 | hydrolase activity, hydrolyzing O-glycos... | 0.026        |
|         | GO:0016307 | phosphatidylinositol phosphate kinase ac... | 0.026        |
|         | GO:0016627 | oxidoreductase activity, acting on the C... | 0.026        |
| MF      | GO:0016903 | oxidoreductase activity, acting on the a... | 0.026        |
|         | GO:0005507 | copper ion binding                          | 0.029        |
|         | GO:0005527 | macrolide binding                           | 0.029        |
|         | GO:0005528 | FK506 binding                               | 0.029        |
|         | GO:0008237 | metallopeptidase activity                   | 0.029        |
|         | GO:0016774 | phosphotransferase activity, carboxyl gr... | 0.030        |
|         | GO:0008289 | lipid binding                               | 0.037        |
|         | GO:0016798 | hydrolase activity, acting on glycosyl b... | 0.039        |
|         | GO:0060589 | nucleoside-triphosphatase regulator acti... | 0.051        |
|         | GO:0015144 | carbohydrate transmembrane transporter a... | 0.054        |
|         | GO:0019200 | carbohydrate kinase activity                | 0.057        |
|         | GO:0016667 | oxidoreductase activity, acting on a sul... | 0.061        |
|         | GO:0016853 | isomerase activity                          | 0.068        |
|         | GO:0016671 | oxidoreductase activity, acting on a sul... | 0.074        |
|         | GO:0009055 | electron transfer activity                  | 0.076        |
|         | GO:0051020 | GTPase binding                              | 0.078        |
|         | GO:0031072 | heat shock protein binding                  | 0.082        |
|         | GO:0035091 | phosphatidylinositol binding                | 0.084        |
|         | GO:0015267 | channel activity                            | 0.094        |
|         | GO:0022803 | passive transmembrane transporter activi... | 0.094        |

#### 4.4.2 Root - Postflowering - Cluster 2

| GO type | GO ID      | Description                                 | Adj. p-value |
|---------|------------|---------------------------------------------|--------------|
|         | GO:0042737 | drug catabolic process                      | 0.000        |
|         | GO:0019748 | secondary metabolic process                 | 0.000        |
|         | GO:0009698 | phenylpropanoid metabolic process           | 0.000        |
|         | GO:0005975 | carbohydrate metabolic process              | 0.000        |
|         | GO:0042546 | cell wall biogenesis                        | 0.000        |
|         | GO:0009832 | plant-type cell wall biogenesis             | 0.000        |
|         | GO:0009808 | lignin metabolic process                    | 0.000        |
|         | GO:0030243 | cellulose metabolic process                 | 0.000        |
|         | GO:0042445 | hormone metabolic process                   | 0.001        |
|         | GO:0010817 | regulation of hormone levels                | 0.003        |
|         | GO:0045490 | pectin catabolic process                    | 0.003        |
|         | GO:0042446 | hormone biosynthetic process                | 0.005        |
|         | GO:0009734 | auxin-activated signaling pathway           | 0.007        |
|         | GO:0055085 | transmembrane transport                     | 0.007        |
|         | GO:2000652 | regulation of secondary cell wall biogen... | 0.009        |
|         | GO:0006694 | steroid biosynthetic process                | 0.010        |
|         | GO:0009074 | aromatic amino acid family catabolic pro... | 0.010        |
|         | GO:0046274 | lignin catabolic process                    | 0.012        |
|         | GO:0015706 | nitrate transport                           | 0.013        |
|         | GO:0006810 | transport                                   | 0.014        |
|         | GO:0008202 | steroid metabolic process                   | 0.014        |
|         | GO:0006811 | ion transport                               | 0.016        |
|         | GO:0034637 | cellular carbohydrate biosynthetic proce... | 0.016        |
|         | GO:0009694 | jasmonic acid metabolic process             | 0.017        |
|         | GO:0051274 | beta-glucan biosynthetic process            | 0.017        |
|         | GO:0018209 | peptidyl-serine modification                | 0.020        |
|         | GO:0046271 | phenylpropanoid catabolic process           | 0.021        |
|         | GO:0051234 | establishment of localization               | 0.027        |
|         | GO:0018105 | peptidyl-serine phosphorylation             | 0.033        |
|         | GO:0046777 | protein autophosphorylation                 | 0.033        |
| BP      | GO:0071365 | cellular response to auxin stimulus         | 0.033        |
|         | GO:0051179 | localization                                | 0.039        |
|         | GO:0032787 | monocarboxylic acid metabolic process       | 0.041        |
|         | GO:0009733 | response to auxin                           | 0.041        |
|         | GO:0009813 | flavonoid biosynthetic process              | 0.043        |
|         | GO:0009056 | catabolic process                           | 0.045        |
|         | GO:0048878 | chemical homeostasis                        | 0.048        |
|         | GO:0010374 | stomatal complex development                | 0.056        |
|         | GO:0010345 | suberin biosynthetic process                | 0.057        |
|         | GO:1903338 | regulation of cell wall organization or ... | 0.058        |
|         | GO:0006082 | organic acid metabolic process              | 0.063        |
|         | GO:0009404 | toxin metabolic process                     | 0.063        |
|         | GO:0009850 | auxin metabolic process                     | 0.063        |
|         | GO:0043436 | oxoacid metabolic process                   | 0.063        |
|         | GO:1901136 | carbohydrate derivative catabolic proces... | 0.063        |
|         | GO:0050801 | ion homeostasis                             | 0.066        |

Continued on next page



| GO type | GO ID      | Description                                 | Adj. p-value |
|---------|------------|---------------------------------------------|--------------|
|         | GO:0010200 | response to chitin                          | 0.068        |
|         | GO:0098771 | inorganic ion homeostasis                   | 0.068        |
|         | GO:0006558 | L-phenylalanine metabolic process           | 0.069        |
|         | GO:1902221 | erythrose 4-phosphate/phosphoenolpyruvat... | 0.069        |
|         | GO:0048544 | recognition of pollen                       | 0.071        |
|         | GO:0008037 | cell recognition                            | 0.074        |
|         | GO:0016143 | S-glycoside metabolic process               | 0.075        |
|         | GO:0019757 | glycosinolate metabolic process             | 0.075        |
|         | GO:0019760 | glucosinolate metabolic process             | 0.075        |
|         | GO:0006629 | lipid metabolic process                     | 0.078        |
|         | GO:0055076 | transition metal ion homeostasis            | 0.083        |
|         | GO:0055080 | cation homeostasis                          | 0.083        |
|         | GO:0030001 | metal ion transport                         | 0.090        |
|         | GO:0009308 | amine metabolic process                     | 0.098        |
|         | GO:0009875 | pollen-pistil interaction                   | 0.098        |
| CC      | GO:0000323 | lytic vacuole                               | 0.000        |
|         | GO:0005773 | vacuole                                     | 0.084        |
|         | GO:0005615 | extracellular space                         | 0.093        |
|         | GO:0016491 | oxidoreductase activity                     | 0.000        |
|         | GO:0016798 | hydrolase activity, acting on glycosyl b... | 0.000        |
|         | GO:0016705 | oxidoreductase activity, acting on paire... | 0.000        |
|         | GO:0022857 | transmembrane transporter activity          | 0.000        |
|         | GO:0022804 | active transmembrane transporter activit... | 0.000        |
|         | GO:0003993 | acid phosphatase activity                   | 0.001        |
|         | GO:0046527 | glucosyltransferase activity                | 0.001        |
|         | GO:0008233 | peptidase activity                          | 0.002        |
|         | GO:0008374 | O-acyltransferase activity                  | 0.002        |
|         | GO:0015075 | ion transmembrane transporter activity      | 0.003        |
|         | GO:0016830 | carbon-carbon lyase activity                | 0.003        |
|         | GO:0004565 | beta-galactosidase activity                 | 0.003        |
|         | GO:0015318 | inorganic molecular entity transmembrane... | 0.003        |
|         | GO:0070011 | peptidase activity, acting on L-amino ac... | 0.004        |
|         | GO:0052716 | hydroquinone:oxygen oxidoreductase activ... | 0.004        |
|         | GO:0005544 | calcium-dependent phospholipid binding      | 0.006        |
|         | GO:0008194 | UDP-glycosyltransferase activity            | 0.007        |
|         | GO:0008238 | exopeptidase activity                       | 0.009        |
|         | GO:0001046 | core promoter sequence-specific DNA bind... | 0.009        |
|         | GO:0004197 | cysteine-type endopeptidase activity        | 0.013        |
|         | GO:0016614 | oxidoreductase activity, acting on CH-OH... | 0.013        |
|         | GO:0098772 | molecular function regulator                | 0.014        |
|         | GO:0016682 | oxidoreductase activity, acting on diphe... | 0.014        |
|         | GO:0016829 | lyase activity                              | 0.014        |
|         | GO:0016838 | carbon-oxygen lyase activity, acting on ... | 0.014        |
|         | GO:0003854 | 3-beta-hydroxy-delta5-steroid dehydrogen... | 0.014        |
|         | GO:0015925 | galactosidase activity                      | 0.015        |
|         | GO:0016229 | steroid dehydrogenase activity              | 0.016        |
|         | GO:0016854 | racemase and epimerase activity             | 0.018        |
|         | GO:0030234 | enzyme regulator activity                   | 0.018        |
|         | GO:0001047 | core promoter binding                       | 0.019        |

Continued on next page

| GO type | GO ID      | Description                                 | Adj. p-value |
|---------|------------|---------------------------------------------|--------------|
|         | GO:0035251 | UDP-glucosyltransferase activity            | 0.020        |
|         | GO:0004867 | serine-type endopeptidase inhibitor acti... | 0.020        |
|         | GO:0050662 | coenzyme binding                            | 0.022        |
|         | GO:0010333 | terpene synthase activity                   | 0.022        |
|         | GO:0008422 | beta-glucosidase activity                   | 0.022        |
|         | GO:0001228 | transcriptional activator activity, RNA ... | 0.023        |
|         | GO:0015112 | nitrate transmembrane transporter activi... | 0.023        |
|         | GO:0033764 | steroid dehydrogenase activity, acting o... | 0.028        |
|         | GO:0004499 | N,N-dimethylaniline monooxygenase activi... | 0.033        |
|         | GO:0016298 | lipase activity                             | 0.036        |
|         | GO:0080043 | quercetin 3-O-glucosyltransferase activi... | 0.036        |
|         | GO:0080044 | quercetin 7-O-glucosyltransferase activi... | 0.036        |
|         | GO:0042285 | xylosyltransferase activity                 | 0.037        |
|         | GO:0016840 | carbon-nitrogen lyase activity              | 0.038        |
|         | GO:0008398 | sterol 14-demethylase activity              | 0.039        |
|         | GO:0010427 | abscisic acid binding                       | 0.042        |
|         | GO:0047372 | acylglycerol lipase activity                | 0.042        |
|         | GO:0016782 | transferase activity, transferring sulfu... | 0.044        |
|         | GO:0005516 | calmodulin binding                          | 0.045        |
|         | GO:0004857 | enzyme inhibitor activity                   | 0.045        |
|         | GO:0015926 | glucosidase activity                        | 0.046        |
|         | GO:0015399 | primary active transmembrane transporter... | 0.047        |
|         | GO:0015405 | P-P-bond-hydrolysis-driven transmembrane... | 0.047        |
|         | GO:0043492 | ATPase activity, coupled to movement of ... | 0.052        |
|         | GO:0042626 | ATPase activity, coupled to transmembran... | 0.057        |
|         | GO:0016679 | oxidoreductase activity, acting on diphe... | 0.058        |
|         | GO:0015168 | glycerol transmembrane transporter activ... | 0.066        |
|         | GO:0004866 | endopeptidase inhibitor activity            | 0.069        |
|         | GO:0061135 | endopeptidase regulator activity            | 0.069        |
|         | GO:0008107 | galactoside 2-alpha-L-fucosyltransferase... | 0.073        |
|         | GO:0016799 | hydrolase activity, hydrolyzing N-glycos... | 0.073        |
|         | GO:0030414 | peptidase inhibitor activity                | 0.073        |
|         | GO:0031127 | alpha-(1,2)-fucosyltransferase activity     | 0.073        |
|         | GO:0061134 | peptidase regulator activity                | 0.073        |
|         | GO:0003700 | DNA binding transcription factor activit... | 0.076        |
|         | GO:0016616 | oxidoreductase activity, acting on the C... | 0.076        |
|         | GO:0000976 | transcription regulatory region sequence... | 0.078        |
|         | GO:0019840 | isoprenoid binding                          | 0.078        |
|         | GO:0008061 | chitin binding                              | 0.078        |
|         | GO:0015179 | L-amino acid transmembrane transporter a... | 0.093        |
|         | GO:0005372 | water transmembrane transporter activity    | 0.099        |
|         | GO:0015250 | water channel activity                      | 0.099        |
|         | GO:0015254 | glycerol channel activity                   | 0.099        |
|         | GO:0000981 | RNA polymerase II transcription factor a... | 0.100        |

#### 4.4.3 Root - Postflowering - Cluster 3

| GO type | GO ID      | Description                                 | Adj. p-value |
|---------|------------|---------------------------------------------|--------------|
|         | GO:0005975 | carbohydrate metabolic process              | 0.000        |
|         | GO:0007017 | microtubule-based process                   | 0.000        |
|         | GO:0042546 | cell wall biogenesis                        | 0.000        |
|         | GO:0098754 | detoxification                              | 0.000        |
|         | GO:0019748 | secondary metabolic process                 | 0.000        |
|         | GO:0044550 | secondary metabolite biosynthetic proces... | 0.000        |
|         | GO:0009832 | plant-type cell wall biogenesis             | 0.000        |
|         | GO:0070592 | cell wall polysaccharide biosynthetic pr... | 0.000        |
|         | GO:0030243 | cellulose metabolic process                 | 0.000        |
|         | GO:0007010 | cytoskeleton organization                   | 0.000        |
|         | GO:0006260 | DNA replication                             | 0.000        |
|         | GO:0006694 | steroid biosynthetic process                | 0.001        |
|         | GO:0009225 | nucleotide-sugar metabolic process          | 0.001        |
|         | GO:1903047 | mitotic cell cycle process                  | 0.002        |
|         | GO:0009150 | purine ribonucleotide metabolic process     | 0.002        |
|         | GO:0000272 | polysaccharide catabolic process            | 0.002        |
|         | GO:1901293 | nucleoside phosphate biosynthetic proces... | 0.002        |
|         | GO:0019953 | sexual reproduction                         | 0.003        |
|         | GO:0034637 | cellular carbohydrate biosynthetic proce... | 0.003        |
|         | GO:0030244 | cellulose biosynthetic process              | 0.003        |
|         | GO:0042545 | cell wall modification                      | 0.004        |
|         | GO:0072522 | purine-containing compound biosynthetic ... | 0.004        |
|         | GO:0009166 | nucleotide catabolic process                | 0.004        |
|         | GO:0009056 | catabolic process                           | 0.004        |
|         | GO:0044042 | glucan metabolic process                    | 0.004        |
|         | GO:0010411 | xyloglucan metabolic process                | 0.004        |
|         | GO:0046434 | organophosphate catabolic process           | 0.004        |
|         | GO:0044703 | multi-organism reproductive process         | 0.005        |
|         | GO:0009165 | nucleotide biosynthetic process             | 0.005        |
|         | GO:0009888 | tissue development                          | 0.005        |
|         | GO:1901137 | carbohydrate derivative biosynthetic pro... | 0.005        |
|         | GO:0000278 | mitotic cell cycle                          | 0.005        |
|         | GO:0022402 | cell cycle process                          | 0.006        |
|         | GO:0006073 | cellular glucan metabolic process           | 0.006        |
|         | GO:0006165 | nucleoside diphosphate phosphorylation      | 0.006        |
|         | GO:0019693 | ribose phosphate metabolic process          | 0.006        |
|         | GO:0009074 | aromatic amino acid family catabolic pro... | 0.006        |
|         | GO:0006096 | glycolytic process                          | 0.006        |
|         | GO:0006757 | ATP generation from ADP                     | 0.006        |
|         | GO:0008202 | steroid metabolic process                   | 0.006        |
|         | GO:0009135 | purine nucleoside diphosphate metabolic ... | 0.006        |
|         | GO:0009179 | purine ribonucleoside diphosphate metabo... | 0.006        |
|         | GO:0009185 | ribonucleoside diphosphate metabolic pro... | 0.006        |
|         | GO:0042866 | pyruvate biosynthetic process               | 0.006        |
|         | GO:0044283 | small molecule biosynthetic process         | 0.006        |
|         | GO:0046031 | ADP metabolic process                       | 0.006        |

Continued on next page

| GO type | GO ID      | Description                                 | Adj. p-value |
|---------|------------|---------------------------------------------|--------------|
|         | GO:1901292 | nucleoside phosphate catabolic process      | 0.006        |
|         | GO:0035556 | intracellular signal transduction           | 0.006        |
|         | GO:0000910 | cytokinesis                                 | 0.007        |
|         | GO:0010374 | stomatal complex development                | 0.008        |
|         | GO:0045493 | xylan catabolic process                     | 0.008        |
|         | GO:0032989 | cellular component morphogenesis            | 0.008        |
|         | GO:0010026 | trichome differentiation                    | 0.009        |
|         | GO:0000902 | cell morphogenesis                          | 0.009        |
|         | GO:0009260 | ribonucleotide biosynthetic process         | 0.009        |
|         | GO:0046390 | ribose phosphate biosynthetic process       | 0.009        |
|         | GO:0006261 | DNA-dependent DNA replication               | 0.009        |
|         | GO:0048869 | cellular developmental process              | 0.009        |
|         | GO:0009734 | auxin-activated signaling pathway           | 0.010        |
|         | GO:0030148 | sphingolipid biosynthetic process           | 0.010        |
|         | GO:0016126 | sterol biosynthetic process                 | 0.010        |
|         | GO:0009259 | ribonucleotide metabolic process            | 0.011        |
|         | GO:0007049 | cell cycle                                  | 0.012        |
|         | GO:2000652 | regulation of secondary cell wall biogen... | 0.012        |
|         | GO:0019359 | nicotinamide nucleotide biosynthetic pro... | 0.013        |
|         | GO:0046496 | nicotinamide nucleotide metabolic proces... | 0.013        |
|         | GO:0090627 | plant epidermal cell differentiation        | 0.013        |
|         | GO:0010038 | response to metal ion                       | 0.013        |
|         | GO:0046274 | lignin catabolic process                    | 0.013        |
|         | GO:0051274 | beta-glucan biosynthetic process            | 0.013        |
|         | GO:0006631 | fatty acid metabolic process                | 0.015        |
|         | GO:0018209 | peptidyl-serine modification                | 0.016        |
|         | GO:0006559 | L-phenylalanine catabolic process           | 0.017        |
|         | GO:0019363 | pyridine nucleotide biosynthetic process    | 0.017        |
|         | GO:1902222 | erythrose 4-phosphate/phosphoenolpyruvat... | 0.017        |
|         | GO:0010016 | shoot system morphogenesis                  | 0.017        |
|         | GO:0019362 | pyridine nucleotide metabolic process       | 0.017        |
|         | GO:0061640 | cytoskeleton-dependent cytokinesis          | 0.020        |
|         | GO:0000226 | microtubule cytoskeleton organization       | 0.021        |
|         | GO:0046271 | phenylpropanoid catabolic process           | 0.021        |
|         | GO:0018105 | peptidyl-serine phosphorylation             | 0.023        |
|         | GO:1903338 | regulation of cell wall organization or ... | 0.024        |
|         | GO:0019318 | hexose metabolic process                    | 0.025        |
|         | GO:0022622 | root system development                     | 0.026        |
|         | GO:0000281 | mitotic cytokinesis                         | 0.026        |
|         | GO:0009226 | nucleotide-sugar biosynthetic process       | 0.028        |
|         | GO:0060560 | developmental growth involved in morphog... | 0.028        |
|         | GO:0032787 | monocarboxylic acid metabolic process       | 0.028        |
|         | GO:0042775 | mitochondrial ATP synthesis coupled elec... | 0.028        |
|         | GO:0010043 | response to zinc ion                        | 0.028        |
|         | GO:0016125 | sterol metabolic process                    | 0.030        |
|         | GO:0048364 | root development                            | 0.032        |
|         | GO:0010103 | stomatal complex morphogenesis              | 0.032        |
|         | GO:0051716 | cellular response to stimulus               | 0.033        |
|         | GO:0016049 | cell growth                                 | 0.035        |

Continued on next page

| GO type | GO ID      | Description                                 | Adj. p-value |
|---------|------------|---------------------------------------------|--------------|
|         | GO:0070887 | cellular response to chemical stimulus      | 0.035        |
|         | GO:0000904 | cell morphogenesis involved in different... | 0.037        |
|         | GO:0046777 | protein autophosphorylation                 | 0.040        |
|         | GO:0043436 | oxoacid metabolic process                   | 0.040        |
|         | GO:0006082 | organic acid metabolic process              | 0.042        |
|         | GO:0072524 | pyridine-containing compound metabolic p... | 0.044        |
|         | GO:0006732 | coenzyme metabolic process                  | 0.044        |
|         | GO:0009826 | unidimensional cell growth                  | 0.044        |
|         | GO:1905392 | plant organ morphogenesis                   | 0.044        |
|         | GO:0009694 | jasmonic acid metabolic process             | 0.044        |
|         | GO:0051510 | regulation of unidimensional cell growth    | 0.044        |
|         | GO:0090626 | plant epidermis morphogenesis               | 0.047        |
|         | GO:0051301 | cell division                               | 0.056        |
|         | GO:0015985 | energy coupled proton transport, down el... | 0.058        |
|         | GO:0015986 | ATP synthesis coupled proton transport      | 0.058        |
|         | GO:0008356 | asymmetric cell division                    | 0.066        |
|         | GO:0006119 | oxidative phosphorylation                   | 0.066        |
|         | GO:0009733 | response to auxin                           | 0.066        |
|         | GO:0042773 | ATP synthesis coupled electron transport    | 0.066        |
|         | GO:0072525 | pyridine-containing compound biosyntheti... | 0.066        |
|         | GO:0097435 | supramolecular fiber organization           | 0.066        |
|         | GO:0010564 | regulation of cell cycle process            | 0.066        |
|         | GO:0019321 | pentose metabolic process                   | 0.067        |
|         | GO:0006733 | oxidoreduction coenzyme metabolic proces... | 0.067        |
|         | GO:0007051 | spindle organization                        | 0.068        |
|         | GO:0009072 | aromatic amino acid family metabolic pro... | 0.068        |
|         | GO:0055082 | cellular chemical homeostasis               | 0.068        |
|         | GO:0006090 | pyruvate metabolic process                  | 0.069        |
|         | GO:0010315 | auxin efflux                                | 0.069        |
|         | GO:0000911 | cytokinesis by cell plate formation         | 0.069        |
|         | GO:0019637 | organophosphate metabolic process           | 0.069        |
|         | GO:0010345 | suberin biosynthetic process                | 0.069        |
|         | GO:0010413 | glucuronoxylan metabolic process            | 0.069        |
|         | GO:0010417 | glucuronoxylan biosynthetic process         | 0.069        |
|         | GO:0030154 | cell differentiation                        | 0.069        |
|         | GO:0006637 | acyl-CoA metabolic process                  | 0.071        |
|         | GO:0035383 | thioester metabolic process                 | 0.071        |
|         | GO:0071365 | cellular response to auxin stimulus         | 0.071        |
|         | GO:0009958 | positive gravitropism                       | 0.073        |
|         | GO:0023052 | signaling                                   | 0.074        |
|         | GO:0007165 | signal transduction                         | 0.077        |
|         | GO:0046364 | monosaccharide biosynthetic process         | 0.083        |
|         | GO:0019752 | carboxylic acid metabolic process           | 0.086        |
|         | GO:0044772 | mitotic cell cycle phase transition         | 0.086        |
|         | GO:0006884 | cell volume homeostasis                     | 0.089        |
|         | GO:0009992 | cellular water homeostasis                  | 0.089        |
|         | GO:0015793 | glycerol transport                          | 0.089        |
|         | GO:0006558 | L-phenylalanine metabolic process           | 0.092        |
|         | GO:1902221 | erythrose 4-phosphate/phosphoenolpyruvat... | 0.092        |

Continued on next page

| GO type | GO ID      | Description                                 | Adj. p-value                                |       |
|---------|------------|---------------------------------------------|---------------------------------------------|-------|
|         | GO:0006979 | response to oxidative stress                | 0.094                                       |       |
|         | GO:0090378 | seed trichome elongation                    | 0.095                                       |       |
| CC      | GO:0005856 | cytoskeleton                                | 0.000                                       |       |
|         | GO:0031225 | anchored component of membrane              | 0.000                                       |       |
|         | GO:0044431 | Golgi apparatus part                        | 0.000                                       |       |
|         | GO:0031226 | intrinsic component of plasma membrane      | 0.000                                       |       |
|         | GO:0044459 | plasma membrane part                        | 0.000                                       |       |
|         | GO:0000786 | nucleosome                                  | 0.001                                       |       |
|         | GO:0009524 | phragmoplast                                | 0.001                                       |       |
|         | GO:0045259 | proton-transporting ATP synthase complex    | 0.001                                       |       |
|         | GO:0005881 | cytoplasmic microtubule                     | 0.001                                       |       |
|         | GO:0055028 | cortical microtubule                        | 0.001                                       |       |
|         | GO:0005768 | endosome                                    | 0.002                                       |       |
|         | GO:0032993 | protein-DNA complex                         | 0.003                                       |       |
|         | GO:0000139 | Golgi membrane                              | 0.003                                       |       |
|         | GO:0005819 | spindle                                     | 0.006                                       |       |
|         | GO:0030863 | cortical cytoskeleton                       | 0.007                                       |       |
|         | GO:0030981 | cortical microtubule cytoskeleton           | 0.007                                       |       |
|         | GO:0043228 | non-membrane-bounded organelle              | 0.008                                       |       |
|         | GO:0043232 | intracellular non-membrane-bounded organ... | 0.008                                       |       |
|         | GO:0044427 | chromosomal part                            | 0.012                                       |       |
|         | GO:0000228 | nuclear chromosome                          | 0.018                                       |       |
|         | GO:0000347 | THO complex                                 | 0.020                                       |       |
|         | GO:0005764 | lysosome                                    | 0.025                                       |       |
|         | GO:0000775 | chromosome, centromeric region              | 0.034                                       |       |
|         | GO:0000323 | lytic vacuole                               | 0.036                                       |       |
|         | GO:0044454 | nuclear chromosome part                     | 0.036                                       |       |
|         | GO:0000788 | nuclear nucleosome                          | 0.045                                       |       |
|         | GO:0009574 | preprophase band                            | 0.047                                       |       |
|         | GO:0005694 | chromosome                                  | 0.095                                       |       |
|         | GO:0043596 | nuclear replication fork                    | 0.096                                       |       |
|         | GO:0000790 | nuclear chromatin                           | 0.097                                       |       |
|         |            | GO:0016491                                  | oxidoreductase activity                     | 0.000 |
|         |            | GO:0016798                                  | hydrolase activity, acting on glycosyl b... | 0.000 |
|         | GO:0016757 | transferase activity, transferring glyco... | 0.000                                       |       |
|         | GO:0016614 | oxidoreductase activity, acting on CH-OH... | 0.000                                       |       |
|         | GO:0050662 | coenzyme binding                            | 0.000                                       |       |
|         | GO:0016616 | oxidoreductase activity, acting on the C... | 0.000                                       |       |
|         | GO:0005088 | Ras guanyl-nucleotide exchange factor ac... | 0.001                                       |       |
|         | GO:0016709 | oxidoreductase activity, acting on paire... | 0.001                                       |       |
|         | GO:0005085 | guanyl-nucleotide exchange factor activi... | 0.002                                       |       |
|         | GO:0008171 | O-methyltransferase activity                | 0.002                                       |       |
|         | GO:0016762 | xyloglucan:xyloglucosyl transferase acti... | 0.002                                       |       |
|         | GO:0008236 | serine-type peptidase activity              | 0.002                                       |       |
|         | GO:0017171 | serine hydrolase activity                   | 0.002                                       |       |
|         | GO:0030599 | pectinesterase activity                     | 0.002                                       |       |
|         | GO:0016758 | transferase activity, transferring hexos... | 0.002                                       |       |
|         | GO:0004565 | beta-galactosidase activity                 | 0.002                                       |       |
|         | GO:0008238 | exopeptidase activity                       | 0.002                                       |       |

Continued on next page

| GO type | GO ID      | Description                                 | Adj. p-value |
|---------|------------|---------------------------------------------|--------------|
|         | GO:0008422 | beta-glucosidase activity                   | 0.003        |
|         | GO:0015926 | glucosidase activity                        | 0.003        |
|         | GO:0016705 | oxidoreductase activity, acting on paire... | 0.003        |
|         | GO:0009044 | xylan 1,4-beta-xylosidase activity          | 0.004        |
|         | GO:0097599 | xylanase activity                           | 0.004        |
|         | GO:0016740 | transferase activity                        | 0.004        |
|         | GO:0052716 | hydroquinone:oxygen oxidoreductase activ... | 0.004        |
|         | GO:0000287 | magnesium ion binding                       | 0.006        |
|         | GO:0004497 | monooxygenase activity                      | 0.007        |
|         | GO:0047372 | acylglycerol lipase activity                | 0.008        |
|         | GO:0016682 | oxidoreductase activity, acting on diphe... | 0.009        |
|         | GO:0016841 | ammonia-lyase activity                      | 0.010        |
|         | GO:0016857 | racemase and epimerase activity, acting ... | 0.010        |
|         | GO:0015562 | efflux transmembrane transporter activit... | 0.011        |
|         | GO:0015925 | galactosidase activity                      | 0.011        |
|         | GO:0016679 | oxidoreductase activity, acting on diphe... | 0.011        |
|         | GO:0009055 | electron transfer activity                  | 0.011        |
|         | GO:0017048 | Rho GTPase binding                          | 0.011        |
|         | GO:0016773 | phosphotransferase activity, alcohol gro... | 0.012        |
|         | GO:0046910 | pectinesterase inhibitor activity           | 0.012        |
|         | GO:0004683 | calmodulin-dependent protein kinase acti... | 0.013        |
|         | GO:0009931 | calcium-dependent protein serine/threoni... | 0.013        |
|         | GO:0010857 | calcium-dependent protein kinase activit... | 0.013        |
|         | GO:0005089 | Rho guanyl-nucleotide exchange factor ac... | 0.014        |
|         | GO:0003854 | 3-beta-hydroxy-delta5-steroid dehydrogen... | 0.016        |
|         | GO:0005506 | iron ion binding                            | 0.016        |
|         | GO:0008398 | sterol 14-demethylase activity              | 0.016        |
|         | GO:0016407 | acetyltransferase activity                  | 0.016        |
|         | GO:0080161 | auxin transmembrane transporter activity    | 0.018        |
|         | GO:0098772 | molecular function regulator                | 0.018        |
|         | GO:0042285 | xylosyltransferase activity                 | 0.019        |
|         | GO:0016854 | racemase and epimerase activity             | 0.019        |
|         | GO:0046527 | glucosyltransferase activity                | 0.020        |
|         | GO:0051287 | NAD binding                                 | 0.022        |
|         | GO:0016301 | kinase activity                             | 0.024        |
|         | GO:0003779 | actin binding                               | 0.026        |
|         | GO:0052689 | carboxylic ester hydrolase activity         | 0.032        |
|         | GO:0033764 | steroid dehydrogenase activity, acting o... | 0.034        |
|         | GO:0005200 | structural constituent of cytoskeleton      | 0.035        |
|         | GO:0005372 | water transmembrane transporter activity    | 0.035        |
|         | GO:0015250 | water channel activity                      | 0.035        |
|         | GO:0015254 | glycerol channel activity                   | 0.035        |
|         | GO:0016229 | steroid dehydrogenase activity              | 0.035        |
|         | GO:0046933 | proton-transporting ATP synthase activit... | 0.035        |
|         | GO:0016799 | hydrolase activity, hydrolyzing N-glycos... | 0.036        |
|         | GO:0005516 | calmodulin binding                          | 0.045        |
|         | GO:0019104 | DNA N-glycosylase activity                  | 0.047        |
|         | GO:0016782 | transferase activity, transferring sulfu... | 0.050        |
|         | GO:0008810 | cellulase activity                          | 0.051        |

Continued on next page

| GO type | GO ID      | Description                                  | Adj. p-value |
|---------|------------|----------------------------------------------|--------------|
|         | GO:0016772 | transferase activity, transferring phosph... | 0.051        |
|         | GO:0004672 | protein kinase activity                      | 0.053        |
|         | GO:0010329 | auxin efflux transmembrane transporter a...  | 0.053        |
|         | GO:0015168 | glycerol transmembrane transporter activ...  | 0.053        |
|         | GO:0016838 | carbon-oxygen lyase activity, acting on ...  | 0.054        |
|         | GO:0016405 | CoA-ligase activity                          | 0.060        |
|         | GO:0016878 | acid-thiol ligase activity                   | 0.060        |
|         | GO:0031406 | carboxylic acid binding                      | 0.060        |
|         | GO:0043177 | organic acid binding                         | 0.060        |
|         | GO:0016298 | lipase activity                              | 0.060        |
|         | GO:0004567 | beta-mannosidase activity                    | 0.063        |
|         | GO:0015020 | glucuronosyltransferase activity             | 0.065        |
|         | GO:0008194 | UDP-glycosyltransferase activity             | 0.066        |
|         | GO:0004650 | polygalacturonase activity                   | 0.073        |
|         | GO:0016829 | lyase activity                               | 0.073        |
|         | GO:0016899 | oxidoreductase activity, acting on the C...  | 0.073        |
|         | GO:0016717 | oxidoreductase activity, acting on paire...  | 0.078        |
|         | GO:0016620 | oxidoreductase activity, acting on the a...  | 0.087        |
|         | GO:0003678 | DNA helicase activity                        | 0.090        |
|         | GO:0005544 | calcium-dependent phospholipid binding       | 0.090        |
|         | GO:0004674 | protein serine/threonine kinase activity     | 0.092        |
|         | GO:0016776 | phosphotransferase activity, phosphate g...  | 0.095        |
|         | GO:0019201 | nucleotide kinase activity                   | 0.098        |



#### 4.4.4 Root - Postflowering - Cluster 4

| GO type | GO ID      | Description                                 | Adj. p-value |
|---------|------------|---------------------------------------------|--------------|
|         | GO:0010383 | cell wall polysaccharide metabolic proce... | 0.000        |
|         | GO:0007017 | microtubule-based process                   | 0.000        |
|         | GO:0019748 | secondary metabolic process                 | 0.000        |
|         | GO:0009832 | plant-type cell wall biogenesis             | 0.000        |
|         | GO:0044550 | secondary metabolite biosynthetic proces... | 0.000        |
|         | GO:0070592 | cell wall polysaccharide biosynthetic pr... | 0.000        |
|         | GO:0030243 | cellulose metabolic process                 | 0.000        |
|         | GO:0009808 | lignin metabolic process                    | 0.000        |
|         | GO:0006793 | phosphorus metabolic process                | 0.000        |
|         | GO:0006694 | steroid biosynthetic process                | 0.001        |
|         | GO:0007165 | signal transduction                         | 0.001        |
|         | GO:0007010 | cytoskeleton organization                   | 0.001        |
|         | GO:0009694 | jasmonic acid metabolic process             | 0.002        |
|         | GO:0009117 | nucleotide metabolic process                | 0.002        |
|         | GO:0019359 | nicotinamide nucleotide biosynthetic pro... | 0.002        |
|         | GO:0072522 | purine-containing compound biosynthetic ... | 0.002        |
|         | GO:0006270 | DNA replication initiation                  | 0.002        |
|         | GO:0009132 | nucleoside diphosphate metabolic process    | 0.002        |
|         | GO:0009888 | tissue development                          | 0.003        |
|         | GO:0006165 | nucleoside diphosphate phosphorylation      | 0.003        |
|         | GO:0008202 | steroid metabolic process                   | 0.003        |
|         | GO:0009152 | purine ribonucleotide biosynthetic proce... | 0.003        |
|         | GO:0019363 | pyridine nucleotide biosynthetic process    | 0.003        |
|         | GO:1901137 | carbohydrate derivative biosynthetic pro... | 0.003        |
|         | GO:1903047 | mitotic cell cycle process                  | 0.003        |
|         | GO:0009225 | nucleotide-sugar metabolic process          | 0.003        |
|         | GO:0009074 | aromatic amino acid family catabolic pro... | 0.003        |
|         | GO:0016310 | phosphorylation                             | 0.003        |
|         | GO:0006164 | purine nucleotide biosynthetic process      | 0.004        |
|         | GO:0008610 | lipid biosynthetic process                  | 0.004        |
|         | GO:0000910 | cytokinesis                                 | 0.004        |
|         | GO:0010026 | trichome differentiation                    | 0.004        |
|         | GO:2000652 | regulation of secondary cell wall biogen... | 0.004        |
|         | GO:0044283 | small molecule biosynthetic process         | 0.004        |
|         | GO:0046939 | nucleotide phosphorylation                  | 0.004        |
|         | GO:0045493 | xylan catabolic process                     | 0.004        |
|         | GO:0009124 | nucleoside monophosphate biosynthetic pr... | 0.004        |
|         | GO:0055082 | cellular chemical homeostasis               | 0.004        |
|         | GO:1901293 | nucleoside phosphate biosynthetic proces... | 0.006        |
|         | GO:0009404 | toxin metabolic process                     | 0.006        |
|         | GO:1903338 | regulation of cell wall organization or ... | 0.007        |
|         | GO:0009156 | ribonucleoside monophosphate biosyntheti... | 0.007        |
|         | GO:0019953 | sexual reproduction                         | 0.007        |
|         | GO:0090627 | plant epidermal cell differentiation        | 0.007        |
|         | GO:0009407 | toxin catabolic process                     | 0.007        |
|         | GO:0052546 | cell wall pectin metabolic process          | 0.007        |

Continued on next page

| GO type | GO ID      | Description                                 | Adj. p-value |
|---------|------------|---------------------------------------------|--------------|
|         | GO:0006090 | pyruvate metabolic process                  | 0.008        |
|         | GO:0043436 | oxoacid metabolic process                   | 0.008        |
|         | GO:0046496 | nicotinamide nucleotide metabolic proces... | 0.008        |
|         | GO:0006082 | organic acid metabolic process              | 0.008        |
|         | GO:0010374 | stomatal complex development                | 0.009        |
|         | GO:0009165 | nucleotide biosynthetic process             | 0.010        |
|         | GO:0019362 | pyridine nucleotide metabolic process       | 0.011        |
|         | GO:0048869 | cellular developmental process              | 0.011        |
|         | GO:0006559 | L-phenylalanine catabolic process           | 0.011        |
|         | GO:0046274 | lignin catabolic process                    | 0.011        |
|         | GO:1902222 | erythrose 4-phosphate/phosphoenolpyruvat... | 0.011        |
|         | GO:0019693 | ribose phosphate metabolic process          | 0.011        |
|         | GO:0000278 | mitotic cell cycle                          | 0.011        |
|         | GO:0051716 | cellular response to stimulus               | 0.012        |
|         | GO:0072525 | pyridine-containing compound biosyntheti... | 0.013        |
|         | GO:0009259 | ribonucleotide metabolic process            | 0.013        |
|         | GO:0048468 | cell development                            | 0.013        |
|         | GO:0006260 | DNA replication                             | 0.014        |
|         | GO:0070085 | glycosylation                               | 0.015        |
|         | GO:0010413 | glucuronoxylan metabolic process            | 0.015        |
|         | GO:0010417 | glucuronoxylan biosynthetic process         | 0.015        |
|         | GO:0090626 | plant epidermis morphogenesis               | 0.015        |
|         | GO:0050801 | ion homeostasis                             | 0.015        |
|         | GO:0006811 | ion transport                               | 0.016        |
|         | GO:0061640 | cytoskeleton-dependent cytokinesis          | 0.016        |
|         | GO:0022402 | cell cycle process                          | 0.016        |
|         | GO:0044703 | multi-organism reproductive process         | 0.016        |
|         | GO:0046364 | monosaccharide biosynthetic process         | 0.016        |
|         | GO:0032989 | cellular component morphogenesis            | 0.016        |
|         | GO:0046271 | phenylpropanoid catabolic process           | 0.017        |
|         | GO:0042445 | hormone metabolic process                   | 0.017        |
|         | GO:0019752 | carboxylic acid metabolic process           | 0.017        |
|         | GO:0044248 | cellular catabolic process                  | 0.018        |
|         | GO:0000226 | microtubule cytoskeleton organization       | 0.018        |
|         | GO:0019637 | organophosphate metabolic process           | 0.018        |
|         | GO:0042221 | response to chemical                        | 0.018        |
|         | GO:0010345 | suberin biosynthetic process                | 0.019        |
|         | GO:0000902 | cell morphogenesis                          | 0.019        |
|         | GO:0070887 | cellular response to chemical stimulus      | 0.019        |
|         | GO:0006884 | cell volume homeostasis                     | 0.019        |
|         | GO:0009992 | cellular water homeostasis                  | 0.019        |
|         | GO:0015793 | glycerol transport                          | 0.019        |
|         | GO:0000281 | mitotic cytokinesis                         | 0.022        |
|         | GO:0030148 | sphingolipid biosynthetic process           | 0.023        |
|         | GO:0006833 | water transport                             | 0.023        |
|         | GO:0042044 | fluid transport                             | 0.023        |
|         | GO:0006261 | DNA-dependent DNA replication               | 0.025        |
|         | GO:0010053 | root epidermal cell differentiation         | 0.027        |
|         | GO:0010817 | regulation of hormone levels                | 0.027        |

Continued on next page

| GO type | GO ID      | Description                                 | Adj. p-value |
|---------|------------|---------------------------------------------|--------------|
|         | GO:0009260 | ribonucleotide biosynthetic process         | 0.027        |
|         | GO:0046390 | ribose phosphate biosynthetic process       | 0.027        |
|         | GO:0009826 | unidimensional cell growth                  | 0.028        |
|         | GO:0010103 | stomatal complex morphogenesis              | 0.028        |
|         | GO:0009695 | jasmonic acid biosynthetic process          | 0.028        |
|         | GO:0006979 | response to oxidative stress                | 0.029        |
|         | GO:0034404 | nucleobase-containing small molecule bio... | 0.029        |
|         | GO:0009934 | regulation of meristem structural organi... | 0.033        |
|         | GO:0010038 | response to metal ion                       | 0.034        |
|         | GO:0072524 | pyridine-containing compound metabolic p... | 0.035        |
|         | GO:0016125 | sterol metabolic process                    | 0.035        |
|         | GO:0010016 | shoot system morphogenesis                  | 0.035        |
|         | GO:0016049 | cell growth                                 | 0.038        |
|         | GO:0051275 | beta-glucan catabolic process               | 0.039        |
|         | GO:0030104 | water homeostasis                           | 0.039        |
|         | GO:0060560 | developmental growth involved in morphog... | 0.040        |
|         | GO:0007049 | cell cycle                                  | 0.041        |
|         | GO:0055080 | cation homeostasis                          | 0.043        |
|         | GO:0022622 | root system development                     | 0.043        |
|         | GO:0098771 | inorganic ion homeostasis                   | 0.044        |
|         | GO:0043069 | negative regulation of programmed cell d... | 0.046        |
|         | GO:0019321 | pentose metabolic process                   | 0.047        |
|         | GO:0055065 | metal ion homeostasis                       | 0.049        |
|         | GO:0048364 | root development                            | 0.050        |
|         | GO:0006732 | coenzyme metabolic process                  | 0.050        |
|         | GO:0022603 | regulation of anatomical structure morph... | 0.051        |
|         | GO:0019318 | hexose metabolic process                    | 0.051        |
|         | GO:0019722 | calcium-mediated signaling                  | 0.055        |
|         | GO:0016043 | cellular component organization             | 0.056        |
|         | GO:0051301 | cell division                               | 0.056        |
|         | GO:0032535 | regulation of cellular component size       | 0.059        |
|         | GO:0048193 | Golgi vesicle transport                     | 0.059        |
|         | GO:0060548 | negative regulation of cell death           | 0.059        |
|         | GO:0090066 | regulation of anatomical structure size     | 0.059        |
|         | GO:0097435 | supramolecular fiber organization           | 0.059        |
|         | GO:0006873 | cellular ion homeostasis                    | 0.061        |
|         | GO:0051510 | regulation of unidimensional cell growth    | 0.067        |
|         | GO:0006733 | oxidoreduction coenzyme metabolic proces... | 0.069        |
|         | GO:0008356 | asymmetric cell division                    | 0.069        |
|         | GO:0051235 | maintenance of location                     | 0.069        |
|         | GO:0009395 | phospholipid catabolic process              | 0.074        |
|         | GO:0010564 | regulation of cell cycle process            | 0.074        |
|         | GO:0015985 | energy coupled proton transport, down el... | 0.075        |
|         | GO:0015986 | ATP synthesis coupled proton transport      | 0.075        |
|         | GO:0031407 | oxylin metabolic process                    | 0.075        |
|         | GO:0006468 | protein phosphorylation                     | 0.076        |
|         | GO:0046686 | response to cadmium ion                     | 0.077        |
|         | GO:0048826 | cotyledon morphogenesis                     | 0.080        |
|         | GO:0030245 | cellulose catabolic process                 | 0.080        |

Continued on next page

| GO type | GO ID      | Description                                 | Adj. p-value |
|---------|------------|---------------------------------------------|--------------|
|         | GO:0010043 | response to zinc ion                        | 0.082        |
|         | GO:0015791 | polyol transport                            | 0.089        |
|         | GO:0065008 | regulation of biological quality            | 0.090        |
|         | GO:0015850 | organic hydroxy compound transport          | 0.095        |
|         | GO:0043648 | dicarboxylic acid metabolic process         | 0.099        |
|         | GO:0031225 | anchored component of membrane              | 0.000        |
|         | GO:0044431 | Golgi apparatus part                        | 0.000        |
|         | GO:0005753 | mitochondrial proton-transporting ATP sy... | 0.001        |
|         | GO:0044815 | DNA packaging complex                       | 0.003        |
|         | GO:0005876 | spindle microtubule                         | 0.004        |
|         | GO:0000323 | lytic vacuole                               | 0.005        |
|         | GO:0000786 | nucleosome                                  | 0.007        |
|         | GO:0005819 | spindle                                     | 0.008        |
|         | GO:0005887 | integral component of plasma membrane       | 0.012        |
|         | GO:0030135 | coated vesicle                              | 0.017        |
|         | GO:0005881 | cytoplasmic microtubule                     | 0.019        |
| CC      | GO:0030863 | cortical cytoskeleton                       | 0.019        |
|         | GO:0030981 | cortical microtubule cytoskeleton           | 0.019        |
|         | GO:0045259 | proton-transporting ATP synthase complex    | 0.019        |
|         | GO:0055028 | cortical microtubule                        | 0.019        |
|         | GO:0009574 | preprophase band                            | 0.025        |
|         | GO:0042575 | DNA polymerase complex                      | 0.036        |
|         | GO:0030136 | clathrin-coated vesicle                     | 0.053        |
|         | GO:0032993 | protein-DNA complex                         | 0.053        |
|         | GO:0000347 | THO complex                                 | 0.062        |
|         | GO:0030173 | integral component of Golgi membrane        | 0.083        |
|         | GO:0031228 | intrinsic component of Golgi membrane       | 0.083        |
|         | GO:0000775 | chromosome, centromeric region              | 0.085        |
|         | GO:0005769 | early endosome                              | 0.085        |
|         | GO:0016491 | oxidoreductase activity                     | 0.000        |
|         | GO:0016757 | transferase activity, transferring glyco... | 0.000        |
|         | GO:0016773 | phosphotransferase activity, alcohol gro... | 0.000        |
|         | GO:0005088 | Ras guanyl-nucleotide exchange factor ac... | 0.000        |
|         | GO:0005085 | guanyl-nucleotide exchange factor activi... | 0.000        |
|         | GO:0004672 | protein kinase activity                     | 0.000        |
|         | GO:0016614 | oxidoreductase activity, acting on CH-OH... | 0.000        |
|         | GO:0005089 | Rho guanyl-nucleotide exchange factor ac... | 0.001        |
|         | GO:0016616 | oxidoreductase activity, acting on the C... | 0.002        |
|         | GO:0008171 | O-methyltransferase activity                | 0.002        |
|         | GO:0016759 | cellulose synthase activity                 | 0.002        |
|         | GO:0016760 | cellulose synthase (UDP-forming) activit... | 0.002        |
|         | GO:0009044 | xylan 1,4-beta-xylosidase activity          | 0.002        |
|         | GO:0097599 | xylanase activity                           | 0.002        |
|         | GO:0008374 | O-acyltransferase activity                  | 0.002        |
|         | GO:0016788 | hydrolase activity, acting on ester bond... | 0.003        |
|         | GO:0022838 | substrate-specific channel activity         | 0.003        |
|         | GO:0098772 | molecular function regulator                | 0.003        |
|         | GO:0016709 | oxidoreductase activity, acting on paire... | 0.003        |
|         | GO:0052716 | hydroquinone:oxygen oxidoreductase activ... | 0.004        |

Continued on next page

| GO type | GO ID      | Description                                 | Adj. p-value |
|---------|------------|---------------------------------------------|--------------|
|         | GO:0015318 | inorganic molecular entity transmembrane... | 0.004        |
|         | GO:0008422 | beta-glucosidase activity                   | 0.004        |
|         | GO:0004497 | monooxygenase activity                      | 0.005        |
|         | GO:0015168 | glycerol transmembrane transporter activ... | 0.005        |
|         | GO:0015267 | channel activity                            | 0.005        |
|         | GO:0015926 | glucosidase activity                        | 0.005        |
|         | GO:0022803 | passive transmembrane transporter activi... | 0.005        |
|         | GO:0043492 | ATPase activity, coupled to movement of ... | 0.006        |
|         | GO:0016705 | oxidoreductase activity, acting on paire... | 0.006        |
|         | GO:0003779 | actin binding                               | 0.006        |
|         | GO:0004674 | protein serine/threonine kinase activity    | 0.006        |
|         | GO:0016682 | oxidoreductase activity, acting on diphe... | 0.006        |
|         | GO:0003854 | 3-beta-hydroxy-delta5-steroid dehydrogen... | 0.006        |
|         | GO:0005372 | water transmembrane transporter activity    | 0.006        |
|         | GO:0015250 | water channel activity                      | 0.006        |
|         | GO:0015254 | glycerol channel activity                   | 0.006        |
|         | GO:0005516 | calmodulin binding                          | 0.008        |
|         | GO:0016679 | oxidoreductase activity, acting on diphe... | 0.008        |
|         | GO:0050662 | coenzyme binding                            | 0.009        |
|         | GO:0000287 | magnesium ion binding                       | 0.010        |
|         | GO:0016841 | ammonia-lyase activity                      | 0.010        |
|         | GO:0016790 | thiolester hydrolase activity               | 0.011        |
|         | GO:0046527 | glucosyltransferase activity                | 0.011        |
|         | GO:0008081 | phosphoric diester hydrolase activity       | 0.011        |
|         | GO:0042578 | phosphoric ester hydrolase activity         | 0.011        |
|         | GO:0042626 | ATPase activity, coupled to transmembran... | 0.012        |
|         | GO:0042285 | xylosyltransferase activity                 | 0.014        |
|         | GO:0033764 | steroid dehydrogenase activity, acting o... | 0.015        |
|         | GO:0016857 | racemase and epimerase activity, acting ... | 0.015        |
|         | GO:0008398 | sterol 14-demethylase activity              | 0.015        |
|         | GO:0052689 | carboxylic ester hydrolase activity         | 0.017        |
|         | GO:0004197 | cysteine-type endopeptidase activity        | 0.018        |
|         | GO:0008810 | cellulase activity                          | 0.018        |
|         | GO:0004650 | polygalacturonase activity                  | 0.019        |
|         | GO:0008194 | UDP-glycosyltransferase activity            | 0.020        |
|         | GO:0015020 | glucuronosyltransferase activity            | 0.024        |
|         | GO:0009055 | electron transfer activity                  | 0.024        |
|         | GO:0015144 | carbohydrate transmembrane transporter a... | 0.024        |
|         | GO:0043168 | anion binding                               | 0.024        |
|         | GO:0005200 | structural constituent of cytoskeleton      | 0.026        |
|         | GO:0016229 | steroid dehydrogenase activity              | 0.030        |
|         | GO:0015399 | primary active transmembrane transporter... | 0.031        |
|         | GO:0015405 | P-P-bond-hydrolysis-driven transmembrane... | 0.031        |
|         | GO:0016298 | lipase activity                             | 0.031        |
|         | GO:0015166 | polyol transmembrane transporter activit... | 0.033        |
|         | GO:0016799 | hydrolase activity, hydrolyzing N-glycos... | 0.038        |
|         | GO:0030234 | enzyme regulator activity                   | 0.039        |
|         | GO:0015562 | efflux transmembrane transporter activit... | 0.043        |
|         | GO:0051287 | NAD binding                                 | 0.043        |

Continued on next page

| GO type | GO ID      | Description                                 | Adj. p-value |
|---------|------------|---------------------------------------------|--------------|
|         | GO:1901618 | organic hydroxy compound transmembrane t... | 0.043        |
|         | GO:0016854 | racemase and epimerase activity             | 0.047        |
|         | GO:0047372 | acylglycerol lipase activity                | 0.055        |
|         | GO:0032451 | demethylase activity                        | 0.057        |
|         | GO:0015077 | monovalent inorganic cation transmembran... | 0.061        |
|         | GO:0010329 | auxin efflux transmembrane transporter a... | 0.071        |
|         | GO:0080161 | auxin transmembrane transporter activity    | 0.073        |
|         | GO:0016838 | carbon-oxygen lyase activity, acting on ... | 0.078        |
|         | GO:0004567 | beta-mannosidase activity                   | 0.082        |
|         | GO:0008144 | drug binding                                | 0.083        |
|         | GO:0004871 | signal transducer activity                  | 0.085        |
|         | GO:0030276 | clathrin binding                            | 0.086        |
|         | GO:0016717 | oxidoreductase activity, acting on paire... | 0.086        |
|         | GO:0016791 | phosphatase activity                        | 0.086        |
|         | GO:0070569 | uridylyltransferase activity                | 0.086        |
|         | GO:0015018 | galactosylgalactosylxylosylprotein 3-bet... | 0.091        |
|         | GO:0004364 | glutathione transferase activity            | 0.097        |
|         | GO:0016829 | lyase activity                              | 0.097        |
|         | GO:0030246 | carbohydrate binding                        | 0.097        |
|         | GO:0010333 | terpene synthase activity                   | 0.098        |

#### 4.4.5 Root - Postflowering - Cluster 5

| GO type | GO ID      | Description                                 | Adj. p-value           |
|---------|------------|---------------------------------------------|------------------------|
|         | GO:0002098 | tRNA wobble uridine modification            | 0.003                  |
|         | GO:0008037 | cell recognition                            | 0.003                  |
|         | GO:0000162 | tryptophan biosynthetic process             | 0.003                  |
|         | GO:0046219 | indolalkylamine biosynthetic process        | 0.003                  |
|         | GO:0009407 | toxin catabolic process                     | 0.003                  |
|         | GO:0048544 | recognition of pollen                       | 0.003                  |
|         | GO:0009875 | pollen-pistil interaction                   | 0.004                  |
|         | GO:0015749 | monosaccharide transmembrane transport      | 0.005                  |
|         | GO:0008645 | hexose transmembrane transport              | 0.006                  |
|         | GO:0098542 | defense response to other organism          | 0.007                  |
|         | GO:0002097 | tRNA wobble base modification               | 0.009                  |
|         | GO:1904659 | glucose transmembrane transport             | 0.010                  |
|         | GO:1902022 | L-lysine transport                          | 0.011                  |
|         | GO:1903401 | L-lysine transmembrane transport            | 0.011                  |
|         | GO:0006568 | tryptophan metabolic process                | 0.013                  |
|         | GO:0006586 | indolalkylamine metabolic process           | 0.013                  |
|         | GO:0048831 | regulation of shoot system development      | 0.014                  |
|         | GO:0009607 | response to biotic stimulus                 | 0.016                  |
|         | GO:0043207 | response to external biotic stimulus        | 0.016                  |
|         | GO:0051707 | response to other organism                  | 0.016                  |
|         | GO:0006836 | neurotransmitter transport                  | 0.017                  |
|         | GO:0046323 | glucose import                              | 0.018                  |
| BP      | GO:0009404 | toxin metabolic process                     | 0.019                  |
|         | GO:0009814 | defense response, incompatible interacti... | 0.021                  |
|         | GO:0035303 | regulation of dephosphorylation             | 0.030                  |
|         | GO:0009627 | systemic acquired resistance                | 0.031                  |
|         | GO:0042430 | indole-containing compound metabolic pro... | 0.033                  |
|         | GO:1901698 | response to nitrogen compound               | 0.039                  |
|         | GO:0010243 | response to organonitrogen compound         | 0.041                  |
|         | GO:0055085 | transmembrane transport                     | 0.042                  |
|         | GO:0051606 | detection of stimulus                       | 0.045                  |
|         | GO:0010921 | regulation of phosphatase activity          | 0.053                  |
|         | GO:0035304 | regulation of protein dephosphorylation     | 0.053                  |
|         | GO:0009309 | amine biosynthetic process                  | 0.061                  |
|         | GO:0009583 | detection of light stimulus                 | 0.061                  |
|         | GO:0042401 | cellular biogenic amine biosynthetic pro... | 0.061                  |
|         | GO:0046677 | response to antibiotic                      | 0.061                  |
|         | GO:0080163 | regulation of protein serine/threonine p... | 0.073                  |
|         | GO:0015802 | basic amino acid transport                  | 0.073                  |
|         | GO:0009909 | regulation of flower development            | 0.085                  |
|         | GO:0043648 | dicarboxylic acid metabolic process         | 0.085                  |
|         | GO:0019748 | secondary metabolic process                 | 0.087                  |
|         | GO:0043666 | regulation of phosphoprotein phosphatase... | 0.090                  |
|         | GO:0002376 | immune system process                       | 0.091                  |
|         | GO:0042447 | hormone catabolic process                   | 0.098                  |
|         | GO:0016020 | membrane                                    | 0.005                  |
| CC      |            |                                             | Continued on next page |

| GO type | GO ID      | Description                                 | Adj. p-value |
|---------|------------|---------------------------------------------|--------------|
|         | GO:0005887 | integral component of plasma membrane       | 0.011        |
|         | GO:0000323 | lytic vacuole                               | 0.028        |
|         | GO:0005764 | lysosome                                    | 0.050        |
|         | GO:0030246 | carbohydrate binding                        | 0.000        |
|         | GO:0080043 | quercetin 3-O-glucosyltransferase activi... | 0.006        |
|         | GO:0080044 | quercetin 7-O-glucosyltransferase activi... | 0.006        |
|         | GO:0016831 | carboxy-lyase activity                      | 0.008        |
|         | GO:0015172 | acidic amino acid transmembrane transpor... | 0.010        |
|         | GO:0015181 | arginine transmembrane transporter activ... | 0.010        |
|         | GO:0015189 | L-lysine transmembrane transporter activ... | 0.010        |
|         | GO:0001871 | pattern binding                             | 0.014        |
|         | GO:0030247 | polysaccharide binding                      | 0.014        |
|         | GO:0015145 | monosaccharide transmembrane transporter... | 0.015        |
|         | GO:0015291 | secondary active transmembrane transport... | 0.016        |
|         | GO:0015149 | hexose transmembrane transporter activit... | 0.017        |
|         | GO:0005326 | neurotransmitter transporter activity       | 0.018        |
| MF      | GO:0015174 | basic amino acid transmembrane transport... | 0.020        |
|         | GO:0005355 | glucose transmembrane transporter activi... | 0.024        |
|         | GO:0004497 | monooxygenase activity                      | 0.036        |
|         | GO:0022804 | active transmembrane transporter activit... | 0.039        |
|         | GO:0016830 | carbon-carbon lyase activity                | 0.043        |
|         | GO:0046914 | transition metal ion binding                | 0.043        |
|         | GO:0051213 | dioxygenase activity                        | 0.043        |
|         | GO:0072509 | divalent inorganic cation transmembrane ... | 0.046        |
|         | GO:0035251 | UDP-glucosyltransferase activity            | 0.056        |
|         | GO:0016705 | oxidoreductase activity, acting on paire... | 0.068        |
|         | GO:0051119 | sugar transmembrane transporter activity    | 0.075        |
|         | GO:0022857 | transmembrane transporter activity          | 0.077        |
|         | GO:0015297 | antiporter activity                         | 0.097        |
|         | GO:0005506 | iron ion binding                            | 0.099        |



#### 4.4.6 Root - Postflowering - Cluster 6

| GO type | GO ID      | Description                                 | Adj. p-value |
|---------|------------|---------------------------------------------|--------------|
|         | GO:0016070 | RNA metabolic process                       | 0.000        |
|         | GO:1903506 | regulation of nucleic acid-templated tra... | 0.000        |
|         | GO:0042493 | response to drug                            | 0.000        |
|         | GO:0006970 | response to osmotic stress                  | 0.000        |
|         | GO:1901701 | cellular response to oxygen-containing c... | 0.003        |
|         | GO:0070647 | protein modification by small protein co... | 0.003        |
|         | GO:0046483 | heterocycle metabolic process               | 0.006        |
|         | GO:0048583 | regulation of response to stimulus          | 0.006        |
|         | GO:0048580 | regulation of post-embryonic development    | 0.006        |
|         | GO:0071229 | cellular response to acid chemical          | 0.006        |
|         | GO:2000026 | regulation of multicellular organismal d... | 0.009        |
|         | GO:0006139 | nucleobase-containing compound metabolic... | 0.010        |
|         | GO:0051239 | regulation of multicellular organismal p... | 0.010        |
|         | GO:0009723 | response to ethylene                        | 0.013        |
|         | GO:0071310 | cellular response to organic substance      | 0.022        |
|         | GO:0005984 | disaccharide metabolic process              | 0.027        |
|         | GO:0009651 | response to salt stress                     | 0.027        |
|         | GO:0071495 | cellular response to endogenous stimulus    | 0.028        |
|         | GO:0032870 | cellular response to hormone stimulus       | 0.029        |
|         | GO:0009311 | oligosaccharide metabolic process           | 0.035        |
|         | GO:0010150 | leaf senescence                             | 0.039        |
|         | GO:0090693 | plant organ senescence                      | 0.039        |
| BP      | GO:0009611 | response to wounding                        | 0.043        |
|         | GO:0009873 | ethylene-activated signaling pathway        | 0.044        |
|         | GO:0046351 | disaccharide biosynthetic process           | 0.044        |
|         | GO:0005992 | trehalose biosynthetic process              | 0.046        |
|         | GO:0050793 | regulation of developmental process         | 0.047        |
|         | GO:0010467 | gene expression                             | 0.049        |
|         | GO:0032446 | protein modification by small protein co... | 0.051        |
|         | GO:0009312 | oligosaccharide biosynthetic process        | 0.054        |
|         | GO:0016567 | protein ubiquitination                      | 0.056        |
|         | GO:0010646 | regulation of cell communication            | 0.059        |
|         | GO:0007568 | aging                                       | 0.059        |
|         | GO:0051241 | negative regulation of multicellular org... | 0.059        |
|         | GO:0006972 | hyperosmotic response                       | 0.069        |
|         | GO:0009966 | regulation of signal transduction           | 0.073        |
|         | GO:2000241 | regulation of reproductive process          | 0.074        |
|         | GO:0007165 | signal transduction                         | 0.075        |
|         | GO:0071369 | cellular response to ethylene stimulus      | 0.075        |
|         | GO:0005991 | trehalose metabolic process                 | 0.077        |
|         | GO:0009755 | hormone-mediated signaling pathway          | 0.077        |
|         | GO:0023051 | regulation of signaling                     | 0.085        |
|         | GO:0023052 | signaling                                   | 0.085        |
|         | GO:0019438 | aromatic compound biosynthetic process      | 0.089        |
|         | GO:0010029 | regulation of seed germination              | 0.093        |
|         | GO:1900140 | regulation of seedling development          | 0.099        |

Continued on next page

| GO type | GO ID      | Description                                 | Adj. p-value |
|---------|------------|---------------------------------------------|--------------|
| CC      | GO:0009507 | chloroplast                                 | 0.000        |
|         | GO:0005634 | nucleus                                     | 0.002        |
|         | GO:0044434 | chloroplast part                            | 0.002        |
|         | GO:0005777 | peroxisome                                  | 0.048        |
|         | GO:0042579 | microbody                                   | 0.048        |
|         | GO:0009532 | plastid stroma                              | 0.050        |
|         | GO:0005623 | cell                                        | 0.064        |
|         | GO:0044464 | cell part                                   | 0.091        |
| MF      | GO:0043565 | sequence-specific DNA binding               | 0.008        |
|         | GO:0003676 | nucleic acid binding                        | 0.016        |
|         | GO:0016671 | oxidoreductase activity, acting on a sul... | 0.019        |
|         | GO:0004721 | phosphoprotein phosphatase activity         | 0.026        |
|         | GO:0016667 | oxidoreductase activity, acting on a sul... | 0.031        |
|         | GO:0003677 | DNA binding                                 | 0.067        |
|         | GO:0019787 | ubiquitin-like protein transferase activ... | 0.091        |

#### 4.4.7 Root - Postflowering - Cluster 7

| GO type | GO ID      | Description                                 | Adj. p-value |
|---------|------------|---------------------------------------------|--------------|
|         | GO:0071554 | cell wall organization or biogenesis        | 0.000        |
|         | GO:0010410 | hemicellulose metabolic process             | 0.000        |
|         | GO:0009808 | lignin metabolic process                    | 0.000        |
|         | GO:0042445 | hormone metabolic process                   | 0.000        |
|         | GO:0007165 | signal transduction                         | 0.000        |
|         | GO:0023052 | signaling                                   | 0.000        |
|         | GO:0055085 | transmembrane transport                     | 0.000        |
|         | GO:0010411 | xyloglucan metabolic process                | 0.001        |
|         | GO:0009753 | response to jasmonic acid                   | 0.001        |
|         | GO:0042537 | benzene-containing compound metabolic pr... | 0.003        |
|         | GO:0009690 | cytokinin metabolic process                 | 0.003        |
|         | GO:0034754 | cellular hormone metabolic process          | 0.004        |
|         | GO:0006559 | L-phenylalanine catabolic process           | 0.004        |
|         | GO:1902222 | erythrose 4-phosphate/phosphoenolpyruvat... | 0.004        |
|         | GO:0015706 | nitrate transport                           | 0.005        |
|         | GO:0009074 | aromatic amino acid family catabolic pro... | 0.005        |
|         | GO:0006811 | ion transport                               | 0.006        |
|         | GO:0015698 | inorganic anion transport                   | 0.008        |
|         | GO:0098656 | anion transmembrane transport               | 0.008        |
|         | GO:1905039 | carboxylic acid transmembrane transport     | 0.008        |
|         | GO:0003333 | amino acid transmembrane transport          | 0.010        |
|         | GO:0080163 | regulation of protein serine/threonine p... | 0.012        |
|         | GO:0009809 | lignin biosynthetic process                 | 0.012        |
|         | GO:0034637 | cellular carbohydrate biosynthetic proce... | 0.013        |
|         | GO:1903825 | organic acid transmembrane transport        | 0.015        |
|         | GO:0071229 | cellular response to acid chemical          | 0.015        |
|         | GO:0006749 | glutathione metabolic process               | 0.016        |
|         | GO:1901136 | carbohydrate derivative catabolic proces... | 0.016        |
|         | GO:0009056 | catabolic process                           | 0.018        |
|         | GO:0042447 | hormone catabolic process                   | 0.021        |
|         | GO:0009691 | cytokinin biosynthetic process              | 0.021        |
|         | GO:0009694 | jasmonic acid metabolic process             | 0.022        |
|         | GO:0006857 | oligopeptide transport                      | 0.026        |
|         | GO:0006865 | amino acid transport                        | 0.028        |
|         | GO:0043086 | negative regulation of catalytic activit... | 0.031        |
| BP      | GO:0006575 | cellular modified amino acid metabolic p... | 0.035        |
|         | GO:0015711 | organic anion transport                     | 0.035        |
|         | GO:0006026 | aminoglycan catabolic process               | 0.038        |
|         | GO:0006030 | chitin metabolic process                    | 0.038        |
|         | GO:0006032 | chitin catabolic process                    | 0.038        |
|         | GO:0010167 | response to nitrate                         | 0.038        |
|         | GO:0046348 | amino sugar catabolic process               | 0.038        |
|         | GO:1901072 | glucosamine-containing compound cataboli... | 0.038        |
|         | GO:0009733 | response to auxin                           | 0.038        |
|         | GO:0045861 | negative regulation of proteolysis          | 0.039        |
|         | GO:0010466 | negative regulation of peptidase activit... | 0.043        |

Continued on next page

| GO type | GO ID      | Description                                 | Adj. p-value |
|---------|------------|---------------------------------------------|--------------|
|         | GO:0010951 | negative regulation of endopeptidase act... | 0.043        |
|         | GO:0051704 | multi-organism process                      | 0.043        |
|         | GO:0052547 | regulation of peptidase activity            | 0.043        |
|         | GO:0052548 | regulation of endopeptidase activity        | 0.043        |
|         | GO:0006694 | steroid biosynthetic process                | 0.045        |
|         | GO:0006558 | L-phenylalanine metabolic process           | 0.046        |
|         | GO:0009969 | xyloglucan biosynthetic process             | 0.046        |
|         | GO:1902221 | erythrose 4-phosphate/phosphoenolpyruvat... | 0.046        |
|         | GO:0045490 | pectin catabolic process                    | 0.046        |
|         | GO:0016143 | S-glycoside metabolic process               | 0.050        |
|         | GO:0019757 | glycosinolate metabolic process             | 0.050        |
|         | GO:0019760 | glucosinolate metabolic process             | 0.050        |
|         | GO:0043666 | regulation of phosphoprotein phosphatase... | 0.050        |
|         | GO:0015780 | nucleotide-sugar transmembrane transport    | 0.051        |
|         | GO:0055076 | transition metal ion homeostasis            | 0.061        |
|         | GO:1901071 | glucosamine-containing compound metaboli... | 0.062        |
|         | GO:0009856 | pollination                                 | 0.064        |
|         | GO:0044706 | multi-multicellular organism process        | 0.064        |
|         | GO:0010243 | response to organonitrogen compound         | 0.070        |
|         | GO:0002237 | response to molecule of bacterial origin    | 0.077        |
|         | GO:0044092 | negative regulation of molecular functio... | 0.077        |
|         | GO:0046777 | protein autophosphorylation                 | 0.084        |
|         | GO:0009607 | response to biotic stimulus                 | 0.091        |
|         | GO:0009734 | auxin-activated signaling pathway           | 0.091        |
|         | GO:0010921 | regulation of phosphatase activity          | 0.092        |
|         | GO:0035304 | regulation of protein dephosphorylation     | 0.092        |
|         | GO:0031225 | anchored component of membrane              | 0.000        |
|         | GO:0044421 | extracellular region part                   | 0.005        |
|         | GO:0005615 | extracellular space                         | 0.035        |
| CC      | GO:0005911 | cell-cell junction                          | 0.058        |
|         | GO:0030054 | cell junction                               | 0.058        |
|         | GO:0009506 | plasmodesma                                 | 0.059        |
|         | GO:0055044 | symplast                                    | 0.059        |
|         | GO:0005215 | transporter activity                        | 0.000        |
|         | GO:0022857 | transmembrane transporter activity          | 0.000        |
|         | GO:0030246 | carbohydrate binding                        | 0.000        |
|         | GO:0015291 | secondary active transmembrane transport... | 0.000        |
|         | GO:0016747 | transferase activity, transferring acyl ... | 0.000        |
|         | GO:0044212 | transcription regulatory region DNA bind... | 0.000        |
|         | GO:0004175 | endopeptidase activity                      | 0.001        |
|         | GO:0016841 | ammonia-lyase activity                      | 0.001        |
|         | GO:0004364 | glutathione transferase activity            | 0.002        |
|         | GO:0008238 | exopeptidase activity                       | 0.002        |
|         | GO:0008509 | anion transmembrane transporter activity    | 0.002        |
|         | GO:0043565 | sequence-specific DNA binding               | 0.002        |
|         | GO:0004867 | serine-type endopeptidase inhibitor acti... | 0.002        |
|         | GO:0004857 | enzyme inhibitor activity                   | 0.002        |
|         | GO:0016838 | carbon-oxygen lyase activity, acting on ... | 0.002        |
|         | GO:0030414 | peptidase inhibitor activity                | 0.004        |

Continued on next page

| GO type | GO ID      | Description                                 | Adj. p-value |
|---------|------------|---------------------------------------------|--------------|
|         | GO:0061134 | peptidase regulator activity                | 0.004        |
|         | GO:0051213 | dioxygenase activity                        | 0.004        |
|         | GO:0010333 | terpene synthase activity                   | 0.005        |
|         | GO:0004866 | endopeptidase inhibitor activity            | 0.007        |
|         | GO:0061135 | endopeptidase regulator activity            | 0.007        |
|         | GO:0046872 | metal ion binding                           | 0.007        |
|         | GO:0010427 | abscisic acid binding                       | 0.008        |
|         | GO:0015171 | amino acid transmembrane transporter act... | 0.008        |
|         | GO:0008233 | peptidase activity                          | 0.009        |
|         | GO:0043169 | cation binding                              | 0.009        |
|         | GO:0004683 | calmodulin-dependent protein kinase acti... | 0.010        |
|         | GO:0004805 | trehalose-phosphatase activity              | 0.010        |
|         | GO:0005516 | calmodulin binding                          | 0.010        |
|         | GO:0009931 | calcium-dependent protein serine/threoni... | 0.010        |
|         | GO:0010857 | calcium-dependent protein kinase activit... | 0.010        |
|         | GO:0016679 | oxidoreductase activity, acting on diphe... | 0.010        |
|         | GO:0004568 | chitinase activity                          | 0.010        |
|         | GO:0045330 | aspartyl esterase activity                  | 0.010        |
|         | GO:0046943 | carboxylic acid transmembrane transporte... | 0.010        |
|         | GO:0004871 | signal transducer activity                  | 0.010        |
|         | GO:0001228 | transcriptional activator activity, RNA ... | 0.013        |
|         | GO:0030599 | pectinesterase activity                     | 0.013        |
|         | GO:0008236 | serine-type peptidase activity              | 0.014        |
|         | GO:0017171 | serine hydrolase activity                   | 0.014        |
|         | GO:0004864 | protein phosphatase inhibitor activity      | 0.014        |
|         | GO:0019212 | phosphatase inhibitor activity              | 0.014        |
|         | GO:0019840 | isoprenoid binding                          | 0.014        |
|         | GO:0070011 | peptidase activity, acting on L-amino ac... | 0.015        |
|         | GO:0005342 | organic acid transmembrane transporter a... | 0.015        |
|         | GO:0008061 | chitin binding                              | 0.015        |
|         | GO:0008107 | galactoside 2-alpha-L-fucosyltransferase... | 0.017        |
|         | GO:0031127 | alpha-(1,2)-fucosyltransferase activity     | 0.017        |
|         | GO:0042626 | ATPase activity, coupled to transmembran... | 0.022        |
|         | GO:0043492 | ATPase activity, coupled to movement of ... | 0.026        |
|         | GO:0043178 | alcohol binding                             | 0.026        |
|         | GO:0019208 | phosphatase regulator activity              | 0.028        |
|         | GO:0019888 | protein phosphatase regulator activity      | 0.028        |
|         | GO:0016854 | racemase and epimerase activity             | 0.031        |
|         | GO:0008398 | sterol 14-demethylase activity              | 0.032        |
|         | GO:0005544 | calcium-dependent phospholipid binding      | 0.040        |
|         | GO:0030234 | enzyme regulator activity                   | 0.040        |
|         | GO:0003854 | 3-beta-hydroxy-delta5-steroid dehydrogen... | 0.045        |
|         | GO:0098772 | molecular function regulator                | 0.045        |
|         | GO:0016765 | transferase activity, transferring alkyl... | 0.051        |
|         | GO:0003959 | NADPH dehydrogenase activity                | 0.053        |
|         | GO:0016229 | steroid dehydrogenase activity              | 0.055        |
|         | GO:0042562 | hormone binding                             | 0.057        |
|         | GO:0015399 | primary active transmembrane transporter... | 0.059        |
|         | GO:0015405 | P-P-bond-hydrolysis-driven transmembrane... | 0.059        |

Continued on next page

| GO type | GO ID      | Description                                 | Adj. p-value |
|---------|------------|---------------------------------------------|--------------|
|         | GO:0016614 | oxidoreductase activity, acting on CH-OH... | 0.066        |
|         | GO:0000981 | RNA polymerase II transcription factor a... | 0.068        |
|         | GO:0033293 | monocarboxylic acid binding                 | 0.073        |
|         | GO:0031406 | carboxylic acid binding                     | 0.076        |
|         | GO:0043177 | organic acid binding                        | 0.076        |
|         | GO:0015112 | nitrate transmembrane transporter activi... | 0.086        |
|         | GO:0015276 | ligand-gated ion channel activity           | 0.086        |
|         | GO:0022834 | ligand-gated channel activity               | 0.086        |
|         | GO:0048038 | quinone binding                             | 0.086        |
|         | GO:0000976 | transcription regulatory region sequence... | 0.087        |
|         | GO:0033764 | steroid dehydrogenase activity, acting o... | 0.089        |
|         | GO:0030594 | neurotransmitter receptor activity          | 0.091        |
|         | GO:0008417 | fucosyltransferase activity                 | 0.093        |

#### 4.4.8 Root - Postflowering - Cluster 8

| GO type | GO ID      | Description                                 | Adj. p-value |
|---------|------------|---------------------------------------------|--------------|
|         | GO:0007017 | microtubule-based process                   | 0.000        |
|         | GO:0010383 | cell wall polysaccharide metabolic proce... | 0.000        |
|         | GO:0042737 | drug catabolic process                      | 0.000        |
|         | GO:0009832 | plant-type cell wall biogenesis             | 0.000        |
|         | GO:0070592 | cell wall polysaccharide biosynthetic pr... | 0.000        |
|         | GO:0019748 | secondary metabolic process                 | 0.000        |
|         | GO:0044550 | secondary metabolite biosynthetic proces... | 0.000        |
|         | GO:0055086 | nucleobase-containing small molecule met... | 0.000        |
|         | GO:0007010 | cytoskeleton organization                   | 0.000        |
|         | GO:1903047 | mitotic cell cycle process                  | 0.000        |
|         | GO:0006694 | steroid biosynthetic process                | 0.000        |
|         | GO:0000910 | cytokinesis                                 | 0.000        |
|         | GO:0009225 | nucleotide-sugar metabolic process          | 0.001        |
|         | GO:0048193 | Golgi vesicle transport                     | 0.001        |
|         | GO:0008202 | steroid metabolic process                   | 0.001        |
|         | GO:0019318 | hexose metabolic process                    | 0.001        |
|         | GO:0000281 | mitotic cytokinesis                         | 0.002        |
|         | GO:0006119 | oxidative phosphorylation                   | 0.002        |
|         | GO:0016126 | sterol biosynthetic process                 | 0.002        |
|         | GO:0042773 | ATP synthesis coupled electron transport    | 0.002        |
|         | GO:0052546 | cell wall pectin metabolic process          | 0.002        |
|         | GO:0009808 | lignin metabolic process                    | 0.002        |
|         | GO:0006261 | DNA-dependent DNA replication               | 0.002        |
|         | GO:0019363 | pyridine nucleotide biosynthetic process    | 0.002        |
|         | GO:0000226 | microtubule cytoskeleton organization       | 0.002        |
|         | GO:0071840 | cellular component organization or bioge... | 0.002        |
|         | GO:0019953 | sexual reproduction                         | 0.002        |
|         | GO:0042545 | cell wall modification                      | 0.002        |
|         | GO:0016049 | cell growth                                 | 0.003        |
|         | GO:0044283 | small molecule biosynthetic process         | 0.003        |
|         | GO:0000911 | cytokinesis by cell plate formation         | 0.003        |
|         | GO:0006260 | DNA replication                             | 0.003        |
|         | GO:0006891 | intra-Golgi vesicle-mediated transport      | 0.003        |
|         | GO:0046777 | protein autophosphorylation                 | 0.003        |
|         | GO:0006090 | pyruvate metabolic process                  | 0.003        |
|         | GO:0042775 | mitochondrial ATP synthesis coupled elec... | 0.004        |
|         | GO:0009888 | tissue development                          | 0.005        |
|         | GO:0046496 | nicotinamide nucleotide metabolic proces... | 0.005        |
|         | GO:0030244 | cellulose biosynthetic process              | 0.005        |
|         | GO:0032506 | cytokinetic process                         | 0.005        |
|         | GO:0032787 | monocarboxylic acid metabolic process       | 0.005        |
|         | GO:1902410 | mitotic cytokinetic process                 | 0.005        |
|         | GO:0035556 | intracellular signal transduction           | 0.005        |
|         | GO:0060560 | developmental growth involved in morphog... | 0.005        |
|         | GO:0051301 | cell division                               | 0.006        |
|         | GO:0010054 | trichoblast differentiation                 | 0.006        |

Continued on next page

| GO type | GO ID      | Description                                 | Adj. p-value |
|---------|------------|---------------------------------------------|--------------|
|         | GO:0006733 | oxidoreduction coenzyme metabolic proces... | 0.007        |
|         | GO:0006101 | citrate metabolic process                   | 0.007        |
|         | GO:0019362 | pyridine nucleotide metabolic process       | 0.007        |
|         | GO:0097435 | supramolecular fiber organization           | 0.007        |
|         | GO:0006833 | water transport                             | 0.007        |
|         | GO:0006884 | cell volume homeostasis                     | 0.007        |
|         | GO:0009992 | cellular water homeostasis                  | 0.007        |
|         | GO:0015793 | glycerol transport                          | 0.007        |
|         | GO:0042044 | fluid transport                             | 0.007        |
|         | GO:0044703 | multi-organism reproductive process         | 0.007        |
|         | GO:0090626 | plant epidermis morphogenesis               | 0.007        |
|         | GO:0010053 | root epidermal cell differentiation         | 0.008        |
|         | GO:0010374 | stomatal complex development                | 0.008        |
|         | GO:0009826 | unidimensional cell growth                  | 0.009        |
|         | GO:0019321 | pentose metabolic process                   | 0.009        |
|         | GO:1902600 | proton transmembrane transport              | 0.010        |
|         | GO:0051274 | beta-glucan biosynthetic process            | 0.011        |
|         | GO:0010038 | response to metal ion                       | 0.011        |
|         | GO:0019722 | calcium-mediated signaling                  | 0.011        |
|         | GO:0048878 | chemical homeostasis                        | 0.011        |
|         | GO:0044255 | cellular lipid metabolic process            | 0.011        |
|         | GO:0010103 | stomatal complex morphogenesis              | 0.012        |
|         | GO:0009226 | nucleotide-sugar biosynthetic process       | 0.012        |
|         | GO:0030104 | water homeostasis                           | 0.012        |
|         | GO:0010026 | trichome differentiation                    | 0.013        |
|         | GO:0015985 | energy coupled proton transport, down el... | 0.013        |
|         | GO:0015986 | ATP synthesis coupled proton transport      | 0.013        |
|         | GO:0072525 | pyridine-containing compound biosyntheti... | 0.013        |
|         | GO:0010564 | regulation of cell cycle process            | 0.014        |
|         | GO:0000904 | cell morphogenesis involved in different... | 0.014        |
|         | GO:0048469 | cell maturation                             | 0.014        |
|         | GO:0048764 | trichoblast maturation                      | 0.014        |
|         | GO:0048765 | root hair cell differentiation              | 0.014        |
|         | GO:0015988 | energy coupled proton transmembrane tran... | 0.015        |
|         | GO:0015991 | ATP hydrolysis coupled proton transport     | 0.015        |
|         | GO:0030148 | sphingolipid biosynthetic process           | 0.015        |
|         | GO:0090662 | ATP hydrolysis coupled transmembrane tra... | 0.015        |
|         | GO:0099131 | ATP hydrolysis coupled ion transmembrane... | 0.015        |
|         | GO:0099132 | ATP hydrolysis coupled cation transmembr... | 0.015        |
|         | GO:1903338 | regulation of cell wall organization or ... | 0.015        |
|         | GO:0009060 | aerobic respiration                         | 0.015        |
|         | GO:0044275 | cellular carbohydrate catabolic process     | 0.015        |
|         | GO:0006006 | glucose metabolic process                   | 0.018        |
|         | GO:0008154 | actin polymerization or depolymerization    | 0.018        |
|         | GO:0022622 | root system development                     | 0.019        |
|         | GO:2000652 | regulation of secondary cell wall biogen... | 0.020        |
|         | GO:0010052 | guard cell differentiation                  | 0.020        |
|         | GO:0022603 | regulation of anatomical structure morph... | 0.021        |
|         | GO:0040007 | growth                                      | 0.021        |

Continued on next page



| GO type | GO ID      | Description                                 | Adj. p-value |
|---------|------------|---------------------------------------------|--------------|
|         | GO:0046686 | response to cadmium ion                     | 0.021        |
|         | GO:0006979 | response to oxidative stress                | 0.021        |
|         | GO:0010016 | shoot system morphogenesis                  | 0.021        |
|         | GO:0006099 | tricarboxylic acid cycle                    | 0.022        |
|         | GO:0032535 | regulation of cellular component size       | 0.022        |
|         | GO:0090066 | regulation of anatomical structure size     | 0.022        |
|         | GO:0072524 | pyridine-containing compound metabolic p... | 0.022        |
|         | GO:0051261 | protein depolymerization                    | 0.022        |
|         | GO:0016125 | sterol metabolic process                    | 0.023        |
|         | GO:0048364 | root development                            | 0.023        |
|         | GO:0008064 | regulation of actin polymerization or de... | 0.024        |
|         | GO:0030832 | regulation of actin filament length         | 0.024        |
|         | GO:0032956 | regulation of actin cytoskeleton organiz... | 0.024        |
|         | GO:0032970 | regulation of actin filament-based proce... | 0.024        |
|         | GO:0110053 | regulation of actin filament organizatio... | 0.024        |
|         | GO:0009934 | regulation of meristem structural organi... | 0.024        |
|         | GO:0034404 | nucleobase-containing small molecule bio... | 0.024        |
|         | GO:0045333 | cellular respiration                        | 0.024        |
|         | GO:0006732 | coenzyme metabolic process                  | 0.025        |
|         | GO:0010413 | glucuronoxylan metabolic process            | 0.025        |
|         | GO:0010417 | glucuronoxylan biosynthetic process         | 0.025        |
|         | GO:0015791 | polyol transport                            | 0.025        |
|         | GO:0007051 | spindle organization                        | 0.027        |
|         | GO:0055082 | cellular chemical homeostasis               | 0.027        |
|         | GO:0044247 | cellular polysaccharide catabolic proces... | 0.027        |
|         | GO:0022904 | respiratory electron transport chain        | 0.028        |
|         | GO:0051275 | beta-glucan catabolic process               | 0.029        |
|         | GO:0044248 | cellular catabolic process                  | 0.029        |
|         | GO:0048589 | developmental growth                        | 0.030        |
|         | GO:0051235 | maintenance of location                     | 0.030        |
|         | GO:0007015 | actin filament organization                 | 0.030        |
|         | GO:0030041 | actin filament polymerization               | 0.032        |
|         | GO:0030833 | regulation of actin filament polymerizat... | 0.032        |
|         | GO:0010345 | suberin biosynthetic process                | 0.033        |
|         | GO:0006811 | ion transport                               | 0.033        |
|         | GO:1905392 | plant organ morphogenesis                   | 0.034        |
|         | GO:0015672 | monovalent inorganic cation transport       | 0.035        |
|         | GO:0030154 | cell differentiation                        | 0.035        |
|         | GO:0007154 | cell communication                          | 0.040        |
|         | GO:0009251 | glucan catabolic process                    | 0.040        |
|         | GO:1901615 | organic hydroxy compound metabolic proce... | 0.040        |
|         | GO:0072350 | tricarboxylic acid metabolic process        | 0.042        |
|         | GO:0044770 | cell cycle phase transition                 | 0.043        |
|         | GO:0034220 | ion transmembrane transport                 | 0.044        |
|         | GO:0019752 | carboxylic acid metabolic process           | 0.046        |
|         | GO:0048826 | cotyledon morphogenesis                     | 0.046        |
|         | GO:0009694 | jasmonic acid metabolic process             | 0.048        |
|         | GO:0009074 | aromatic amino acid family catabolic pro... | 0.049        |
|         | GO:0009395 | phospholipid catabolic process              | 0.049        |

Continued on next page

| GO type | GO ID      | Description                                 | Adj. p-value |
|---------|------------|---------------------------------------------|--------------|
|         | GO:0009100 | glycoprotein metabolic process              | 0.049        |
|         | GO:0016482 | cytosolic transport                         | 0.049        |
|         | GO:0030036 | actin cytoskeleton organization             | 0.049        |
|         | GO:0006486 | protein glycosylation                       | 0.050        |
|         | GO:0006637 | acyl-CoA metabolic process                  | 0.050        |
|         | GO:0030029 | actin filament-based process                | 0.050        |
|         | GO:0035383 | thioester metabolic process                 | 0.050        |
|         | GO:0043413 | macromolecule glycosylation                 | 0.050        |
|         | GO:0043436 | oxoacid metabolic process                   | 0.050        |
|         | GO:0070085 | glycosylation                               | 0.050        |
|         | GO:0044772 | mitotic cell cycle phase transition         | 0.051        |
|         | GO:0051716 | cellular response to stimulus               | 0.051        |
|         | GO:0009629 | response to gravity                         | 0.052        |
|         | GO:0006793 | phosphorus metabolic process                | 0.053        |
|         | GO:0043547 | positive regulation of GTPase activity      | 0.053        |
|         | GO:0019566 | arabinose metabolic process                 | 0.053        |
|         | GO:1901617 | organic hydroxy compound biosynthetic pr... | 0.053        |
|         | GO:0046364 | monosaccharide biosynthetic process         | 0.054        |
|         | GO:0006082 | organic acid metabolic process              | 0.055        |
|         | GO:0009108 | coenzyme biosynthetic process               | 0.055        |
|         | GO:0023052 | signaling                                   | 0.055        |
|         | GO:0051258 | protein polymerization                      | 0.055        |
|         | GO:0051726 | regulation of cell cycle                    | 0.055        |
|         | GO:0046274 | lignin catabolic process                    | 0.056        |
|         | GO:0030245 | cellulose catabolic process                 | 0.057        |
|         | GO:0006812 | cation transport                            | 0.057        |
|         | GO:0007165 | signal transduction                         | 0.058        |
|         | GO:0000280 | nuclear division                            | 0.062        |
|         | GO:0070887 | cellular response to chemical stimulus      | 0.064        |
|         | GO:0048825 | cotyledon development                       | 0.064        |
|         | GO:0046835 | carbohydrate phosphorylation                | 0.065        |
|         | GO:0051510 | regulation of unidimensional cell growth    | 0.065        |
|         | GO:0030004 | cellular monovalent inorganic cation hom... | 0.065        |
|         | GO:0090378 | seed trichome elongation                    | 0.073        |
|         | GO:0048638 | regulation of developmental growth          | 0.075        |
|         | GO:0043647 | inositol phosphate metabolic process        | 0.077        |
|         | GO:0046271 | phenylpropanoid catabolic process           | 0.077        |
|         | GO:0010215 | cellulose microfibril organization          | 0.078        |
|         | GO:0006559 | L-phenylalanine catabolic process           | 0.082        |
|         | GO:1902222 | erythrose 4-phosphate/phosphoenolpyruvat... | 0.082        |
|         | GO:0046854 | phosphatidylinositol phosphorylation        | 0.083        |
|         | GO:0080147 | root hair cell development                  | 0.086        |
|         | GO:0098662 | inorganic cation transmembrane transport    | 0.087        |
|         | GO:0008356 | asymmetric cell division                    | 0.088        |
|         | GO:0019932 | second-messenger-mediated signaling         | 0.093        |
|         | GO:0006012 | galactose metabolic process                 | 0.093        |
|         | GO:0051129 | negative regulation of cellular componen... | 0.094        |
|         | GO:0009250 | glucan biosynthetic process                 | 0.094        |
|         | GO:0015850 | organic hydroxy compound transport          | 0.094        |

Continued on next page

| GO type | GO ID      | Description                                 | Adj. p-value |
|---------|------------|---------------------------------------------|--------------|
|         | GO:0043087 | regulation of GTPase activity               | 0.098        |
|         | GO:0005856 | cytoskeleton                                | 0.000        |
|         | GO:0031225 | anchored component of membrane              | 0.000        |
|         | GO:0044431 | Golgi apparatus part                        | 0.000        |
|         | GO:0044459 | plasma membrane part                        | 0.000        |
|         | GO:0005819 | spindle                                     | 0.001        |
|         | GO:0030120 | vesicle coat                                | 0.001        |
|         | GO:0044815 | DNA packaging complex                       | 0.001        |
|         | GO:0030135 | coated vesicle                              | 0.001        |
|         | GO:0030660 | Golgi-associated vesicle membrane           | 0.002        |
|         | GO:0000786 | nucleosome                                  | 0.002        |
|         | GO:0005881 | cytoplasmic microtubule                     | 0.002        |
|         | GO:0030662 | coated vesicle membrane                     | 0.003        |
|         | GO:0055028 | cortical microtubule                        | 0.004        |
|         | GO:0030863 | cortical cytoskeleton                       | 0.004        |
|         | GO:0030981 | cortical microtubule cytoskeleton           | 0.004        |
|         | GO:0033177 | proton-transporting two-sector ATPase co... | 0.004        |
|         | GO:0030659 | cytoplasmic vesicle membrane                | 0.006        |
|         | GO:0045259 | proton-transporting ATP synthase complex    | 0.006        |
|         | GO:0032993 | protein-DNA complex                         | 0.014        |
|         | GO:0009574 | preprophase band                            | 0.015        |
|         | GO:0030117 | membrane coat                               | 0.017        |
| CC      | GO:0048475 | coated membrane                             | 0.017        |
|         | GO:0033176 | proton-transporting V-type ATPase comple... | 0.018        |
|         | GO:0042575 | DNA polymerase complex                      | 0.018        |
|         | GO:0044427 | chromosomal part                            | 0.018        |
|         | GO:0030136 | clathrin-coated vesicle                     | 0.022        |
|         | GO:0000775 | chromosome, centromeric region              | 0.022        |
|         | GO:0012506 | vesicle membrane                            | 0.025        |
|         | GO:0005769 | early endosome                              | 0.041        |
|         | GO:0030173 | integral component of Golgi membrane        | 0.044        |
|         | GO:0031228 | intrinsic component of Golgi membrane       | 0.044        |
|         | GO:0000347 | THO complex                                 | 0.048        |
|         | GO:0000228 | nuclear chromosome                          | 0.048        |
|         | GO:0005798 | Golgi-associated vesicle                    | 0.048        |
|         | GO:0005694 | chromosome                                  | 0.058        |
|         | GO:0044433 | cytoplasmic vesicle part                    | 0.061        |
|         | GO:0005838 | proteasome regulatory particle              | 0.062        |
|         | GO:0022624 | proteasome accessory complex                | 0.062        |
|         | GO:0009504 | cell plate                                  | 0.062        |
|         | GO:0000793 | condensed chromosome                        | 0.062        |
|         | GO:0044454 | nuclear chromosome part                     | 0.077        |
|         | GO:0008540 | proteasome regulatory particle, base sub... | 0.078        |
|         | GO:0033178 | proton-transporting two-sector ATPase co... | 0.078        |
|         | GO:0005657 | replication fork                            | 0.095        |
|         | GO:0016787 | hydrolase activity                          | 0.000        |
|         | GO:0016491 | oxidoreductase activity                     | 0.000        |
|         | GO:0046906 | tetrapyrrole binding                        | 0.000        |
|         | GO:0016757 | transferase activity, transferring glyco... | 0.000        |

Continued on next page

| GO type | GO ID      | Description                                 | Adj. p-value |
|---------|------------|---------------------------------------------|--------------|
|         | GO:0016614 | oxidoreductase activity, acting on CH-OH... | 0.000        |
|         | GO:0005215 | transporter activity                        | 0.000        |
|         | GO:0016747 | transferase activity, transferring acyl ... | 0.000        |
|         | GO:0005085 | guanyl-nucleotide exchange factor activi... | 0.000        |
|         | GO:0005088 | Ras guanyl-nucleotide exchange factor ac... | 0.000        |
|         | GO:0050662 | coenzyme binding                            | 0.000        |
|         | GO:0098772 | molecular function regulator                | 0.001        |
|         | GO:0046910 | pectinesterase inhibitor activity           | 0.001        |
|         | GO:0051287 | NAD binding                                 | 0.001        |
|         | GO:0046983 | protein dimerization activity               | 0.002        |
|         | GO:0008374 | O-acyltransferase activity                  | 0.002        |
|         | GO:0016758 | transferase activity, transferring hexos... | 0.002        |
|         | GO:0042285 | xylosyltransferase activity                 | 0.003        |
|         | GO:0003854 | 3-beta-hydroxy-delta5-steroid dehydrogen... | 0.003        |
|         | GO:0016407 | acetyltransferase activity                  | 0.003        |
|         | GO:0005372 | water transmembrane transporter activity    | 0.003        |
|         | GO:0015250 | water channel activity                      | 0.003        |
|         | GO:0015254 | glycerol channel activity                   | 0.003        |
|         | GO:0004683 | calmodulin-dependent protein kinase acti... | 0.003        |
|         | GO:0009931 | calcium-dependent protein serine/threoni... | 0.003        |
|         | GO:0010857 | calcium-dependent protein kinase activit... | 0.003        |
|         | GO:0004650 | polygalacturonase activity                  | 0.003        |
|         | GO:0009055 | electron transfer activity                  | 0.004        |
|         | GO:0008422 | beta-glucosidase activity                   | 0.004        |
|         | GO:0008171 | O-methyltransferase activity                | 0.004        |
|         | GO:0015926 | glucosidase activity                        | 0.004        |
|         | GO:0015267 | channel activity                            | 0.004        |
|         | GO:0022803 | passive transmembrane transporter activi... | 0.004        |
|         | GO:0022838 | substrate-specific channel activity         | 0.005        |
|         | GO:0015168 | glycerol transmembrane transporter activ... | 0.005        |
|         | GO:0015318 | inorganic molecular entity transmembrane... | 0.006        |
|         | GO:0042578 | phosphoric ester hydrolase activity         | 0.007        |
|         | GO:0016759 | cellulose synthase activity                 | 0.007        |
|         | GO:0016760 | cellulose synthase (UDP-forming) activit... | 0.007        |
|         | GO:0033764 | steroid dehydrogenase activity, acting o... | 0.007        |
|         | GO:0036442 | proton-exporting ATPase activity            | 0.007        |
|         | GO:0005516 | calmodulin binding                          | 0.009        |
|         | GO:0008081 | phosphoric diester hydrolase activity       | 0.009        |
|         | GO:0016740 | transferase activity                        | 0.012        |
|         | GO:0044769 | ATPase activity, coupled to transmembran... | 0.012        |
|         | GO:0016773 | phosphotransferase activity, alcohol gro... | 0.012        |
|         | GO:0016679 | oxidoreductase activity, acting on diphe... | 0.015        |
|         | GO:0016868 | intramolecular transferase activity, pho... | 0.015        |
|         | GO:0016301 | kinase activity                             | 0.016        |
|         | GO:0016857 | racemase and epimerase activity, acting ... | 0.017        |
|         | GO:0016229 | steroid dehydrogenase activity              | 0.017        |
|         | GO:0046933 | proton-transporting ATP synthase activit... | 0.017        |
|         | GO:0004567 | beta-mannosidase activity                   | 0.018        |
|         | GO:0015166 | polyol transmembrane transporter activit... | 0.019        |

Continued on next page

| GO type | GO ID      | Description                                 | Adj. p-value |
|---------|------------|---------------------------------------------|--------------|
|         | GO:0016620 | oxidoreductase activity, acting on the a... | 0.019        |
|         | GO:1901618 | organic hydroxy compound transmembrane t... | 0.021        |
|         | GO:0015144 | carbohydrate transmembrane transporter a... | 0.024        |
|         | GO:0052689 | carboxylic ester hydrolase activity         | 0.027        |
|         | GO:0070569 | uridylyltransferase activity                | 0.027        |
|         | GO:0005200 | structural constituent of cytoskeleton      | 0.027        |
|         | GO:0008398 | sterol 14-demethylase activity              | 0.028        |
|         | GO:0052716 | hydroquinone:oxygen oxidoreductase activ... | 0.030        |
|         | GO:0015075 | ion transmembrane transporter activity      | 0.031        |
|         | GO:0016705 | oxidoreductase activity, acting on paire... | 0.033        |
|         | GO:0016709 | oxidoreductase activity, acting on paire... | 0.036        |
|         | GO:0046527 | glucosyltransferase activity                | 0.037        |
|         | GO:0046961 | proton-transporting ATPase activity, rot... | 0.038        |
|         | GO:0004620 | phospholipase activity                      | 0.039        |
|         | GO:0015018 | galactosylgalactosylxylosylprotein 3-bet... | 0.041        |
|         | GO:0019829 | cation-transporting ATPase activity         | 0.041        |
|         | GO:0022853 | active ion transmembrane transporter act... | 0.041        |
|         | GO:0042625 | ATPase coupled ion transmembrane transpo... | 0.041        |
|         | GO:0016682 | oxidoreductase activity, acting on diphe... | 0.042        |
|         | GO:0008194 | UDP-glycosyltransferase activity            | 0.042        |
|         | GO:0016903 | oxidoreductase activity, acting on the a... | 0.042        |
|         | GO:0008810 | cellulase activity                          | 0.046        |
|         | GO:0015077 | monovalent inorganic cation transmembran... | 0.047        |
|         | GO:0016854 | racemase and epimerase activity             | 0.048        |
|         | GO:0015020 | glucuronosyltransferase activity            | 0.050        |
|         | GO:0030276 | clathrin binding                            | 0.051        |
|         | GO:0140097 | catalytic activity, acting on DNA           | 0.051        |
|         | GO:0016298 | lipase activity                             | 0.054        |
|         | GO:0047372 | acylglycerol lipase activity                | 0.054        |
|         | GO:0016717 | oxidoreductase activity, acting on paire... | 0.057        |
|         | GO:0017111 | nucleoside-triphosphatase activity          | 0.059        |
|         | GO:0030234 | enzyme regulator activity                   | 0.061        |
|         | GO:0016772 | transferase activity, transferring phosp... | 0.062        |
|         | GO:0015154 | disaccharide transmembrane transporter a... | 0.063        |
|         | GO:0015157 | oligosaccharide transmembrane transporte... | 0.063        |
|         | GO:0016782 | transferase activity, transferring sulfu... | 0.067        |
|         | GO:0008324 | cation transmembrane transporter activit... | 0.073        |
|         | GO:0015078 | proton transmembrane transporter activit... | 0.077        |
|         | GO:0016878 | acid-thiol ligase activity                  | 0.077        |
|         | GO:0051015 | actin filament binding                      | 0.077        |
|         | GO:0022890 | inorganic cation transmembrane transport... | 0.080        |
|         | GO:0015923 | mannosidase activity                        | 0.086        |
|         | GO:0016790 | thiolester hydrolase activity               | 0.087        |
|         | GO:0016818 | hydrolase activity, acting on acid anhyd... | 0.091        |
|         | GO:0015399 | primary active transmembrane transporter... | 0.095        |
|         | GO:0015405 | P-P-bond-hydrolysis-driven transmembrane... | 0.095        |
|         | GO:0080161 | auxin transmembrane transporter activity    | 0.095        |
|         | GO:0032451 | demethylase activity                        | 0.095        |
|         | GO:0043492 | ATPase activity, coupled to movement of ... | 0.096        |

Continued on next page

---

| GO type | GO ID      | Description              | Adj. p-value |
|---------|------------|--------------------------|--------------|
|         | GO:0004743 | pyruvate kinase activity | 0.099        |
|         | GO:0030955 | potassium ion binding    | 0.099        |
|         | GO:0031420 | alkali metal ion binding | 0.099        |

---

#### 4.4.9 Root - Postflowering - Cluster 9

| GO type | GO ID      | Description                                 | Adj. p-value |
|---------|------------|---------------------------------------------|--------------|
|         | GO:0090304 | nucleic acid metabolic process              | 0.000        |
|         | GO:0060255 | regulation of macromolecule metabolic pr... | 0.000        |
|         | GO:0051171 | regulation of nitrogen compound metaboli... | 0.000        |
|         | GO:2000112 | regulation of cellular macromolecule bio... | 0.000        |
|         | GO:0006351 | transcription, DNA-templated                | 0.000        |
|         | GO:0010468 | regulation of gene expression               | 0.000        |
|         | GO:0080090 | regulation of primary metabolic process     | 0.000        |
|         | GO:0008645 | hexose transmembrane transport              | 0.000        |
|         | GO:0055085 | transmembrane transport                     | 0.000        |
|         | GO:0019748 | secondary metabolic process                 | 0.003        |
|         | GO:0018130 | heterocycle biosynthetic process            | 0.003        |
|         | GO:0080163 | regulation of protein serine/threonine p... | 0.003        |
|         | GO:0042430 | indole-containing compound metabolic pro... | 0.003        |
|         | GO:0032446 | protein modification by small protein co... | 0.006        |
|         | GO:0006511 | ubiquitin-dependent protein catabolic pr... | 0.006        |
|         | GO:0010921 | regulation of phosphatase activity          | 0.006        |
|         | GO:0043632 | modification-dependent macromolecule cat... | 0.006        |
|         | GO:1902022 | L-lysine transport                          | 0.007        |
|         | GO:1903401 | L-lysine transmembrane transport            | 0.007        |
|         | GO:0016567 | protein ubiquitination                      | 0.007        |
|         | GO:0034654 | nucleobase-containing compound biosynthe... | 0.008        |
|         | GO:0006568 | tryptophan metabolic process                | 0.011        |
|         | GO:0006586 | indolalkylamine metabolic process           | 0.011        |
|         | GO:0019941 | modification-dependent protein catabolic... | 0.011        |
|         | GO:0035303 | regulation of dephosphorylation             | 0.011        |
|         | GO:0043666 | regulation of phosphoprotein phosphatase... | 0.015        |
|         | GO:0044550 | secondary metabolite biosynthetic proces... | 0.016        |
|         | GO:0009072 | aromatic amino acid family metabolic pro... | 0.018        |
| BP      | GO:0006796 | phosphate-containing compound metabolic ... | 0.028        |
|         | GO:0000162 | tryptophan biosynthetic process             | 0.028        |
|         | GO:0046219 | indolalkylamine biosynthetic process        | 0.028        |
|         | GO:0070647 | protein modification by small protein co... | 0.028        |
|         | GO:0035304 | regulation of protein dephosphorylation     | 0.028        |
|         | GO:0009073 | aromatic amino acid family biosynthetic ... | 0.037        |
|         | GO:0051603 | proteolysis involved in cellular protein... | 0.040        |
|         | GO:0044257 | cellular protein catabolic process          | 0.042        |
|         | GO:0006974 | cellular response to DNA damage stimulus    | 0.046        |
|         | GO:0015802 | basic amino acid transport                  | 0.054        |
|         | GO:0006281 | DNA repair                                  | 0.055        |
|         | GO:0009110 | vitamin biosynthetic process                | 0.060        |
|         | GO:0042364 | water-soluble vitamin biosynthetic proce... | 0.070        |
|         | GO:0003333 | amino acid transmembrane transport          | 0.070        |
|         | GO:0006508 | proteolysis                                 | 0.070        |
|         | GO:0006793 | phosphorus metabolic process                | 0.070        |
|         | GO:0009407 | toxin catabolic process                     | 0.071        |
|         | GO:0030163 | protein catabolic process                   | 0.071        |

Continued on next page

| GO type | GO ID      | Description                                 | Adj. p-value |
|---------|------------|---------------------------------------------|--------------|
|         | GO:1902475 | L-alpha-amino acid transmembrane transpo... | 0.075        |
|         | GO:0006820 | anion transport                             | 0.080        |
|         | GO:0019740 | nitrogen utilization                        | 0.088        |
|         | GO:0000041 | transition metal ion transport              | 0.089        |
|         | GO:0006836 | neurotransmitter transport                  | 0.089        |
|         | GO:0010200 | response to chitin                          | 0.089        |
|         | GO:1905039 | carboxylic acid transmembrane transport     | 0.093        |
|         | GO:0009308 | amine metabolic process                     | 0.095        |
|         | GO:0051276 | chromosome organization                     | 0.098        |
|         | GO:0006259 | DNA metabolic process                       | 0.100        |
|         | GO:0006811 | ion transport                               | 0.100        |
|         | GO:0044425 | membrane part                               | 0.002        |
|         | GO:0031226 | intrinsic component of plasma membrane      | 0.007        |
|         | GO:0044798 | nuclear transcription factor complex        | 0.033        |
| CC      | GO:0090575 | RNA polymerase II transcription factor c... | 0.035        |
|         | GO:0044459 | plasma membrane part                        | 0.037        |
|         | GO:0016020 | membrane                                    | 0.085        |
|         | GO:0005886 | plasma membrane                             | 0.090        |
|         | GO:0004672 | protein kinase activity                     | 0.000        |
|         | GO:0015075 | ion transmembrane transporter activity      | 0.002        |
|         | GO:0003700 | DNA binding transcription factor activit... | 0.003        |
|         | GO:0043565 | sequence-specific DNA binding               | 0.003        |
|         | GO:0005215 | transporter activity                        | 0.003        |
|         | GO:0022804 | active transmembrane transporter activit... | 0.004        |
|         | GO:0051119 | sugar transmembrane transporter activity    | 0.004        |
|         | GO:0015181 | arginine transmembrane transporter activ... | 0.005        |
|         | GO:0015189 | L-lysine transmembrane transporter activ... | 0.005        |
|         | GO:0015297 | antiporter activity                         | 0.008        |
|         | GO:0015172 | acidic amino acid transmembrane transpor... | 0.009        |
|         | GO:0003690 | double-stranded DNA binding                 | 0.010        |
|         | GO:0015174 | basic amino acid transmembrane transport... | 0.010        |
|         | GO:0019787 | ubiquitin-like protein transferase activ... | 0.010        |
|         | GO:0001047 | core promoter binding                       | 0.011        |
|         | GO:0004864 | protein phosphatase inhibitor activity      | 0.011        |
|         | GO:0019212 | phosphatase inhibitor activity              | 0.011        |
|         | GO:0015318 | inorganic molecular entity transmembrane... | 0.011        |
|         | GO:0004842 | ubiquitin-protein transferase activity      | 0.012        |
| MF      | GO:0051213 | dioxygenase activity                        | 0.014        |
|         | GO:0020037 | heme binding                                | 0.016        |
|         | GO:0001046 | core promoter sequence-specific DNA bind... | 0.017        |
|         | GO:0008324 | cation transmembrane transporter activit... | 0.019        |
|         | GO:0019208 | phosphatase regulator activity              | 0.019        |
|         | GO:0019888 | protein phosphatase regulator activity      | 0.019        |
|         | GO:0035251 | UDP-glucosyltransferase activity            | 0.021        |
|         | GO:0010427 | abscisic acid binding                       | 0.025        |
|         | GO:0140110 | transcription regulator activity            | 0.028        |
|         | GO:0046915 | transition metal ion transmembrane trans... | 0.029        |
|         | GO:0046906 | tetrapyrrole binding                        | 0.031        |
|         | GO:0046983 | protein dimerization activity               | 0.031        |

Continued on next page



| GO type | GO ID      | Description                                 | Adj. p-value |
|---------|------------|---------------------------------------------|--------------|
|         | GO:0072509 | divalent inorganic cation transmembrane ... | 0.040        |
|         | GO:0019840 | isoprenoid binding                          | 0.042        |
|         | GO:0042562 | hormone binding                             | 0.050        |
|         | GO:0005326 | neurotransmitter transporter activity       | 0.055        |
|         | GO:0001228 | transcriptional activator activity, RNA ... | 0.060        |
|         | GO:1990837 | sequence-specific double-stranded DNA bi... | 0.072        |
|         | GO:0015238 | drug transmembrane transporter activity     | 0.075        |
|         | GO:0000976 | transcription regulatory region sequence... | 0.084        |
|         | GO:0005385 | zinc ion transmembrane transporter activ... | 0.100        |

#### 4.4.10 Root - Postflowering - Cluster 10

| GO type | GO ID      | Description                                 | Adj. p-value |
|---------|------------|---------------------------------------------|--------------|
|         | GO:0034660 | ncRNA metabolic process                     | 0.000        |
|         | GO:0034470 | ncRNA processing                            | 0.000        |
|         | GO:0022613 | ribonucleoprotein complex biogenesis        | 0.000        |
|         | GO:0042254 | ribosome biogenesis                         | 0.000        |
|         | GO:0009451 | RNA modification                            | 0.000        |
|         | GO:0009657 | plastid organization                        | 0.000        |
|         | GO:0006996 | organelle organization                      | 0.000        |
|         | GO:0006259 | DNA metabolic process                       | 0.000        |
|         | GO:0010468 | regulation of gene expression               | 0.000        |
|         | GO:0070647 | protein modification by small protein co... | 0.000        |
|         | GO:0043414 | macromolecule methylation                   | 0.000        |
|         | GO:0019684 | photosynthesis, light reaction              | 0.000        |
|         | GO:0001510 | RNA methylation                             | 0.000        |
|         | GO:0010629 | negative regulation of gene expression      | 0.000        |
|         | GO:0009628 | response to abiotic stimulus                | 0.000        |
|         | GO:0051171 | regulation of nitrogen compound metaboli... | 0.000        |
|         | GO:0032446 | protein modification by small protein co... | 0.000        |
|         | GO:0006351 | transcription, DNA-templated                | 0.000        |
|         | GO:0080090 | regulation of primary metabolic process     | 0.000        |
|         | GO:0006401 | RNA catabolic process                       | 0.000        |
|         | GO:0009266 | response to temperature stimulus            | 0.000        |
|         | GO:0009314 | response to radiation                       | 0.000        |
|         | GO:0010608 | posttranscriptional regulation of gene e... | 0.000        |
|         | GO:0000245 | spliceosomal complex assembly               | 0.000        |
|         | GO:0022607 | cellular component assembly                 | 0.000        |
|         | GO:0009416 | response to light stimulus                  | 0.000        |
|         | GO:0009642 | response to light intensity                 | 0.000        |
|         | GO:0042273 | ribosomal large subunit biogenesis          | 0.000        |
|         | GO:0071826 | ribonucleoprotein complex subunit organi... | 0.000        |
|         | GO:0051276 | chromosome organization                     | 0.000        |
|         | GO:0019219 | regulation of nucleobase-containing comp... | 0.000        |
|         | GO:2000112 | regulation of cellular macromolecule bio... | 0.000        |
|         | GO:0042274 | ribosomal small subunit biogenesis          | 0.000        |
|         | GO:0048580 | regulation of post-embryonic development    | 0.000        |
|         | GO:0000154 | rRNA modification                           | 0.000        |
|         | GO:0000956 | nuclear-transcribed mRNA catabolic proce... | 0.000        |
|         | GO:0018205 | peptidyl-lysine modification                | 0.000        |
|         | GO:0015994 | chlorophyll metabolic process               | 0.000        |
|         | GO:0009909 | regulation of flower development            | 0.000        |
|         | GO:0010109 | regulation of photosynthesis                | 0.000        |
|         | GO:0022618 | ribonucleoprotein complex assembly          | 0.000        |
|         | GO:0006400 | tRNA modification                           | 0.000        |
|         | GO:0051252 | regulation of RNA metabolic process         | 0.000        |
|         | GO:0065002 | intracellular protein transmembrane tran... | 0.000        |
|         | GO:0090501 | RNA phosphodiester bond hydrolysis          | 0.001        |
|         | GO:0006406 | mRNA export from nucleus                    | 0.001        |

Continued on next page

| GO type | GO ID      | Description                                 | Adj. p-value |
|---------|------------|---------------------------------------------|--------------|
|         | GO:0010228 | vegetative to reproductive phase transit... | 0.001        |
|         | GO:0006357 | regulation of transcription by RNA polym... | 0.001        |
|         | GO:0016458 | gene silencing                              | 0.001        |
|         | GO:0040029 | regulation of gene expression, epigeneti... | 0.001        |
|         | GO:0006417 | regulation of translation                   | 0.001        |
|         | GO:0030490 | maturation of SSU-rRNA                      | 0.001        |
|         | GO:0034622 | cellular protein-containing complex asse... | 0.001        |
|         | GO:0006355 | regulation of transcription, DNA-templat... | 0.001        |
|         | GO:0048518 | positive regulation of biological proces... | 0.001        |
|         | GO:0071478 | cellular response to radiation              | 0.001        |
|         | GO:0034248 | regulation of cellular amide metabolic p... | 0.002        |
|         | GO:0072594 | establishment of protein localization to... | 0.002        |
|         | GO:0000460 | maturation of 5.8S rRNA                     | 0.002        |
|         | GO:0044743 | protein transmembrane import into intrac... | 0.002        |
|         | GO:0065003 | protein-containing complex assembly         | 0.002        |
|         | GO:0006325 | chromatin organization                      | 0.002        |
|         | GO:0006605 | protein targeting                           | 0.002        |
|         | GO:0006518 | peptide metabolic process                   | 0.002        |
|         | GO:0032259 | methylation                                 | 0.002        |
|         | GO:0042440 | pigment metabolic process                   | 0.003        |
|         | GO:2000024 | regulation of leaf development              | 0.003        |
|         | GO:0000380 | alternative mRNA splicing, via spliceoso... | 0.003        |
|         | GO:0033554 | cellular response to stress                 | 0.003        |
|         | GO:2000113 | negative regulation of cellular macromol... | 0.003        |
|         | GO:0009648 | photoperiodism                              | 0.003        |
|         | GO:0009668 | plastid membrane organization               | 0.003        |
|         | GO:0010027 | thylakoid membrane organization             | 0.003        |
|         | GO:0032784 | regulation of DNA-templated transcriptio... | 0.004        |
|         | GO:0005982 | starch metabolic process                    | 0.004        |
|         | GO:0006289 | nucleotide-excision repair                  | 0.004        |
|         | GO:0048608 | reproductive structure development          | 0.004        |
|         | GO:0061458 | reproductive system development             | 0.004        |
|         | GO:0015995 | chlorophyll biosynthetic process            | 0.004        |
|         | GO:0031503 | protein-containing complex localization     | 0.004        |
|         | GO:0006415 | translational termination                   | 0.004        |
|         | GO:0031167 | rRNA methylation                            | 0.004        |
|         | GO:0016569 | covalent chromatin modification             | 0.004        |
|         | GO:0051028 | mRNA transport                              | 0.004        |
|         | GO:1903311 | regulation of mRNA metabolic process        | 0.004        |
|         | GO:0006354 | DNA-templated transcription, elongation     | 0.004        |
|         | GO:0019252 | starch biosynthetic process                 | 0.005        |
|         | GO:0006778 | porphyrin-containing compound metabolic ... | 0.005        |
|         | GO:0051641 | cellular localization                       | 0.005        |
|         | GO:0032984 | protein-containing complex disassembly      | 0.006        |
|         | GO:0000413 | protein peptidyl-prolyl isomerization       | 0.006        |
|         | GO:0018208 | peptidyl-proline modification               | 0.006        |
|         | GO:0050789 | regulation of biological process            | 0.006        |
|         | GO:0016441 | posttranscriptional gene silencing          | 0.006        |
|         | GO:0006310 | DNA recombination                           | 0.006        |

Continued on next page

| GO type | GO ID      | Description                                 | Adj. p-value |
|---------|------------|---------------------------------------------|--------------|
|         | GO:0009617 | response to bacterium                       | 0.006        |
|         | GO:1903506 | regulation of nucleic acid-templated tra... | 0.006        |
|         | GO:2001141 | regulation of RNA biosynthetic process      | 0.006        |
|         | GO:0034654 | nucleobase-containing compound biosynthe... | 0.007        |
|         | GO:0003006 | developmental process involved in reprod... | 0.007        |
|         | GO:0051168 | nuclear export                              | 0.007        |
|         | GO:0006405 | RNA export from nucleus                     | 0.007        |
|         | GO:0043603 | cellular amide metabolic process            | 0.007        |
|         | GO:0002098 | tRNA wobble uridine modification            | 0.007        |
|         | GO:0031047 | gene silencing by RNA                       | 0.007        |
|         | GO:0009893 | positive regulation of metabolic process    | 0.007        |
|         | GO:0051246 | regulation of protein metabolic process     | 0.007        |
|         | GO:0031123 | RNA 3'-end processing                       | 0.008        |
|         | GO:1905156 | negative regulation of photosynthesis       | 0.008        |
|         | GO:0071482 | cellular response to light stimulus         | 0.008        |
|         | GO:0045037 | protein import into chloroplast stroma      | 0.008        |
|         | GO:0045184 | establishment of protein localization       | 0.008        |
|         | GO:0010207 | photosystem II assembly                     | 0.008        |
|         | GO:0030488 | tRNA methylation                            | 0.009        |
|         | GO:0006479 | protein methylation                         | 0.009        |
|         | GO:0008213 | protein alkylation                          | 0.009        |
|         | GO:0035196 | production of miRNAs involved in gene si... | 0.010        |
|         | GO:0016570 | histone modification                        | 0.010        |
|         | GO:0051649 | establishment of localization in cell       | 0.010        |
|         | GO:0031324 | negative regulation of cellular metaboli... | 0.011        |
|         | GO:0006383 | transcription by RNA polymerase III         | 0.011        |
|         | GO:0015031 | protein transport                           | 0.011        |
|         | GO:0016573 | histone acetylation                         | 0.011        |
|         | GO:0018393 | internal peptidyl-lysine acetylation        | 0.011        |
|         | GO:0018394 | peptidyl-lysine acetylation                 | 0.011        |
|         | GO:0031124 | mRNA 3'-end processing                      | 0.011        |
|         | GO:0002097 | tRNA wobble base modification               | 0.012        |
|         | GO:0000122 | negative regulation of transcription by ... | 0.012        |
|         | GO:0033014 | tetrapyrrole biosynthetic process           | 0.013        |
|         | GO:0032268 | regulation of cellular protein metabolic... | 0.013        |
|         | GO:0050657 | nucleic acid transport                      | 0.013        |
|         | GO:0050658 | RNA transport                               | 0.013        |
|         | GO:0051236 | establishment of RNA localization           | 0.013        |
|         | GO:0007623 | circadian rhythm                            | 0.013        |
|         | GO:0048511 | rhythmic process                            | 0.013        |
|         | GO:0006413 | translational initiation                    | 0.013        |
|         | GO:0042548 | regulation of photosynthesis, light reac... | 0.013        |
|         | GO:0006475 | internal protein amino acid acetylation     | 0.014        |
|         | GO:0016556 | mRNA modification                           | 0.015        |
|         | GO:1901566 | organonitrogen compound biosynthetic pro... | 0.015        |
|         | GO:0008104 | protein localization                        | 0.015        |
|         | GO:0015833 | peptide transport                           | 0.015        |
|         | GO:0046907 | intracellular transport                     | 0.015        |
|         | GO:0043038 | amino acid activation                       | 0.015        |

Continued on next page

| GO type | GO ID      | Description                                 | Adj. p-value |
|---------|------------|---------------------------------------------|--------------|
|         | GO:0043039 | tRNA aminoacylation                         | 0.015        |
|         | GO:0016973 | poly(A)+ mRNA export from nucleus           | 0.016        |
|         | GO:0006403 | RNA localization                            | 0.017        |
|         | GO:0048573 | photoperiodism, flowering                   | 0.017        |
|         | GO:0000469 | cleavage involved in rRNA processing        | 0.017        |
|         | GO:0006298 | mismatch repair                             | 0.017        |
|         | GO:0042886 | amide transport                             | 0.017        |
|         | GO:0022411 | cellular component disassembly              | 0.018        |
|         | GO:2000242 | negative regulation of reproductive proc... | 0.018        |
|         | GO:1900864 | mitochondrial RNA modification              | 0.021        |
|         | GO:0032436 | positive regulation of proteasomal ubiqu... | 0.021        |
|         | GO:0042742 | defense response to bacterium               | 0.021        |
|         | GO:2000060 | positive regulation of ubiquitin-depende... | 0.021        |
|         | GO:0030091 | protein repair                              | 0.021        |
|         | GO:0032502 | developmental process                       | 0.021        |
|         | GO:0032544 | plastid translation                         | 0.022        |
|         | GO:0006379 | mRNA cleavage                               | 0.022        |
|         | GO:0009890 | negative regulation of biosynthetic proc... | 0.023        |
|         | GO:0006779 | porphyrin-containing compound biosynthet... | 0.024        |
|         | GO:0050793 | regulation of developmental process         | 0.024        |
|         | GO:0051247 | positive regulation of protein metabolic... | 0.025        |
|         | GO:0008284 | positive regulation of cell proliferatio... | 0.025        |
|         | GO:0032270 | positive regulation of cellular protein ... | 0.025        |
|         | GO:0006368 | transcription elongation from RNA polyme... | 0.026        |
|         | GO:0031325 | positive regulation of cellular metaboli... | 0.026        |
|         | GO:0018193 | peptidyl-amino acid modification            | 0.027        |
|         | GO:0045143 | homologous chromosome segregation           | 0.029        |
|         | GO:0005977 | glycogen metabolic process                  | 0.030        |
|         | GO:0006112 | energy reserve metabolic process            | 0.030        |
|         | GO:2000030 | regulation of response to red or far red... | 0.030        |
|         | GO:0000478 | endonucleolytic cleavage involved in rRN... | 0.030        |
|         | GO:0031050 | dsRNA fragmentation                         | 0.030        |
|         | GO:0043331 | response to dsRNA                           | 0.030        |
|         | GO:0070918 | production of small RNA involved in gene... | 0.030        |
|         | GO:0071359 | cellular response to dsRNA                  | 0.030        |
|         | GO:0010604 | positive regulation of macromolecule met... | 0.030        |
|         | GO:0000462 | maturation of SSU-rRNA from tricistronic... | 0.031        |
|         | GO:0051052 | regulation of DNA metabolic process         | 0.031        |
|         | GO:0046148 | pigment biosynthetic process                | 0.034        |
|         | GO:0048522 | positive regulation of cellular process     | 0.034        |
|         | GO:0005978 | glycogen biosynthetic process               | 0.034        |
|         | GO:0035194 | posttranscriptional gene silencing by RN... | 0.034        |
|         | GO:0031327 | negative regulation of cellular biosynth... | 0.034        |
|         | GO:0018022 | peptidyl-lysine methylation                 | 0.034        |
|         | GO:0051173 | positive regulation of nitrogen compound... | 0.034        |
|         | GO:0006913 | nucleocytoplasmic transport                 | 0.035        |
|         | GO:0007275 | multicellular organism development          | 0.035        |
|         | GO:0009910 | negative regulation of flower developmen... | 0.035        |
|         | GO:0051169 | nuclear transport                           | 0.035        |

Continued on next page

| GO type | GO ID      | Description                                 | Adj. p-value |
|---------|------------|---------------------------------------------|--------------|
|         | GO:0022414 | reproductive process                        | 0.035        |
|         | GO:0070192 | chromosome organization involved in meio... | 0.035        |
|         | GO:0140053 | mitochondrial gene expression               | 0.035        |
|         | GO:0032501 | multicellular organismal process            | 0.036        |
|         | GO:0007127 | meiosis I                                   | 0.037        |
|         | GO:0061982 | meiosis I cell cycle process                | 0.037        |
|         | GO:0045934 | negative regulation of nucleobase-contai... | 0.037        |
|         | GO:0045132 | meiotic chromosome segregation              | 0.038        |
|         | GO:0032434 | regulation of proteasomal ubiquitin-depe... | 0.041        |
|         | GO:2000058 | regulation of ubiquitin-dependent protei... | 0.041        |
|         | GO:0007129 | synapsis                                    | 0.041        |
|         | GO:0071483 | cellular response to blue light             | 0.042        |
|         | GO:0033036 | macromolecule localization                  | 0.042        |
|         | GO:0000003 | reproduction                                | 0.042        |
|         | GO:0006378 | mRNA polyadenylation                        | 0.042        |
|         | GO:0010558 | negative regulation of macromolecule bio... | 0.043        |
|         | GO:0019438 | aromatic compound biosynthetic process      | 0.045        |
|         | GO:0035265 | organ growth                                | 0.046        |
|         | GO:0048581 | negative regulation of post-embryonic de... | 0.047        |
|         | GO:1901607 | alpha-amino acid biosynthetic process       | 0.047        |
|         | GO:0051241 | negative regulation of multicellular org... | 0.048        |
|         | GO:0007059 | chromosome segregation                      | 0.049        |
|         | GO:0070475 | rRNA base methylation                       | 0.049        |
|         | GO:0009908 | flower development                          | 0.049        |
|         | GO:0043572 | plastid fission                             | 0.049        |
|         | GO:0006879 | cellular iron ion homeostasis               | 0.053        |
|         | GO:0006418 | tRNA aminoacylation for protein translat... | 0.053        |
|         | GO:0032543 | mitochondrial translation                   | 0.053        |
|         | GO:0000302 | response to reactive oxygen species         | 0.053        |
|         | GO:0016246 | RNA interference                            | 0.053        |
|         | GO:0048856 | anatomical structure development            | 0.053        |
|         | GO:0009894 | regulation of catabolic process             | 0.056        |
|         | GO:0010206 | photosystem II repair                       | 0.056        |
|         | GO:0009791 | post-embryonic development                  | 0.057        |
|         | GO:0034599 | cellular response to oxidative stress       | 0.057        |
|         | GO:0034249 | negative regulation of cellular amide me... | 0.059        |
|         | GO:1901362 | organic cyclic compound biosynthetic pro... | 0.062        |
|         | GO:0015931 | nucleobase-containing compound transport    | 0.063        |
|         | GO:0006091 | generation of precursor metabolites and ... | 0.065        |
|         | GO:0007006 | mitochondrial membrane organization         | 0.065        |
|         | GO:0017148 | negative regulation of translation          | 0.066        |
|         | GO:0043467 | regulation of generation of precursor me... | 0.067        |
|         | GO:0006560 | proline metabolic process                   | 0.068        |
|         | GO:0080156 | mitochondrial mRNA modification             | 0.069        |
|         | GO:0071369 | cellular response to ethylene stimulus      | 0.069        |
|         | GO:0031053 | primary miRNA processing                    | 0.070        |
|         | GO:0051050 | positive regulation of transport            | 0.070        |
|         | GO:0051172 | negative regulation of nitrogen compound... | 0.070        |
|         | GO:0090503 | RNA phosphodiester bond hydrolysis, exon... | 0.070        |

Continued on next page

| GO type | GO ID      | Description                                 | Adj. p-value |
|---------|------------|---------------------------------------------|--------------|
|         | GO:0048523 | negative regulation of cellular process     | 0.074        |
|         | GO:0009911 | positive regulation of flower developmen... | 0.076        |
|         | GO:0090056 | regulation of chlorophyll metabolic proc... | 0.079        |
|         | GO:0018198 | peptidyl-cysteine modification              | 0.081        |
|         | GO:0043631 | RNA polyadenylation                         | 0.083        |
|         | GO:0010020 | chloroplast fission                         | 0.085        |
|         | GO:0060249 | anatomical structure homeostasis            | 0.085        |
|         | GO:0045892 | negative regulation of transcription, DN... | 0.087        |
|         | GO:0031056 | regulation of histone modification          | 0.089        |
|         | GO:0007005 | mitochondrion organization                  | 0.090        |
|         | GO:0051253 | negative regulation of RNA metabolic pro... | 0.090        |
|         | GO:0009640 | photomorphogenesis                          | 0.090        |
|         | GO:0016109 | tetraterpenoid biosynthetic process         | 0.091        |
|         | GO:0016117 | carotenoid biosynthetic process             | 0.091        |
|         | GO:0050794 | regulation of cellular process              | 0.091        |
|         | GO:0016114 | terpenoid biosynthetic process              | 0.091        |
|         | GO:0031329 | regulation of cellular catabolic process    | 0.095        |
|         | GO:0043624 | cellular protein complex disassembly        | 0.097        |
|         | GO:0090567 | reproductive shoot system development       | 0.099        |
|         | GO:0048731 | system development                          | 0.100        |
|         | GO:0005654 | nucleoplasm                                 | 0.000        |
|         | GO:1990234 | transferase complex                         | 0.000        |
|         | GO:0044451 | nucleoplasm part                            | 0.000        |
|         | GO:0000151 | ubiquitin ligase complex                    | 0.000        |
|         | GO:0005681 | spliceosomal complex                        | 0.000        |
|         | GO:0016604 | nuclear body                                | 0.000        |
|         | GO:0009295 | nucleoid                                    | 0.000        |
|         | GO:0042646 | plastid nucleoid                            | 0.000        |
|         | GO:0071010 | prespliceosome                              | 0.000        |
|         | GO:0042170 | plastid membrane                            | 0.000        |
|         | GO:0031969 | chloroplast membrane                        | 0.000        |
|         | GO:0016591 | DNA-directed RNA polymerase II, holoenzy... | 0.001        |
|         | GO:0009521 | photosystem                                 | 0.001        |
|         | GO:0071011 | precatalytic spliceosome                    | 0.001        |
|         | GO:0005686 | U2 snRNP                                    | 0.001        |
|         | GO:0043228 | non-membrane-bounded organelle              | 0.002        |
|         | GO:0043232 | intracellular non-membrane-bounded organ... | 0.002        |
|         | GO:0000243 | commitment complex                          | 0.003        |
|         | GO:0005739 | mitochondrion                               | 0.003        |
|         | GO:0005666 | DNA-directed RNA polymerase III complex     | 0.004        |
|         | GO:0016592 | mediator complex                            | 0.004        |
|         | GO:0030686 | 90S preribosome                             | 0.004        |
|         | GO:0030687 | preribosome, large subunit precursor        | 0.004        |
|         | GO:0005694 | chromosome                                  | 0.005        |
|         | GO:0080008 | Cul4-RING E3 ubiquitin ligase complex       | 0.011        |
| CC      | GO:0000784 | nuclear chromosome, telomeric region        | 0.012        |
|         | GO:0000123 | histone acetyltransferase complex           | 0.014        |
|         | GO:0000228 | nuclear chromosome                          | 0.014        |
|         | GO:0031984 | organelle subcompartment                    | 0.015        |

Continued on next page

| GO type | GO ID      | Description                                 | Adj. p-value           |
|---------|------------|---------------------------------------------|------------------------|
|         | GO:0005689 | U12-type spliceosomal complex               | 0.018                  |
|         | GO:0044452 | nucleolar part                              | 0.019                  |
|         | GO:0048500 | signal recognition particle                 | 0.020                  |
|         | GO:0008023 | transcription elongation factor complex     | 0.021                  |
|         | GO:0000781 | chromosome, telomeric region                | 0.023                  |
|         | GO:0005759 | mitochondrial matrix                        | 0.031                  |
|         | GO:0005777 | peroxisome                                  | 0.031                  |
|         | GO:0042579 | microbody                                   | 0.031                  |
|         | GO:0005667 | transcription factor complex                | 0.033                  |
|         | GO:0044454 | nuclear chromosome part                     | 0.036                  |
|         | GO:0009654 | photosystem II oxygen evolving complex      | 0.044                  |
|         | GO:0000178 | exosome (RNase complex)                     | 0.051                  |
|         | GO:1905354 | exoribonuclease complex                     | 0.051                  |
|         | GO:0000176 | nuclear exosome (RNase complex)             | 0.080                  |
|         | GO:1902554 | serine/threonine protein kinase complex     | 0.087                  |
|         | GO:1902911 | protein kinase complex                      | 0.087                  |
|         | GO:0000152 | nuclear ubiquitin ligase complex            | 0.091                  |
|         | GO:0015030 | Cajal body                                  | 0.091                  |
|         | GO:0031248 | protein acetyltransferase complex           | 0.091                  |
|         | GO:1902493 | acetyltransferase complex                   | 0.091                  |
|         | GO:0009527 | plastid outer membrane                      | 0.095                  |
|         | GO:0031968 | organelle outer membrane                    | 0.097                  |
|         | GO:0140098 | catalytic activity, acting on RNA           | 0.000                  |
|         | GO:0003724 | RNA helicase activity                       | 0.000                  |
|         | GO:0004518 | nuclease activity                           | 0.000                  |
|         | GO:0008173 | RNA methyltransferase activity              | 0.000                  |
|         | GO:0051536 | iron-sulfur cluster binding                 | 0.000                  |
|         | GO:0044877 | protein-containing complex binding          | 0.001                  |
|         | GO:0004540 | ribonuclease activity                       | 0.001                  |
|         | GO:0140101 | catalytic activity, acting on a tRNA        | 0.004                  |
|         | GO:0003690 | double-stranded DNA binding                 | 0.006                  |
|         | GO:0003677 | DNA binding                                 | 0.008                  |
|         | GO:0003713 | transcription coactivator activity          | 0.008                  |
|         | GO:0008649 | rRNA methyltransferase activity             | 0.008                  |
|         | GO:0140102 | catalytic activity, acting on a rRNA        | 0.008                  |
|         | GO:2001070 | starch binding                              | 0.008                  |
|         | GO:0008408 | 3'-5' exonuclease activity                  | 0.012                  |
|         | GO:0004003 | ATP-dependent DNA helicase activity         | 0.012                  |
|         | GO:0051537 | 2 iron, 2 sulfur cluster binding            | 0.012                  |
|         | GO:0016896 | exoribonuclease activity, producing 5'-p... | 0.012                  |
|         | GO:0016893 | endonuclease activity, active with eithe... | 0.013                  |
|         | GO:0003924 | GTPase activity                             | 0.013                  |
|         | GO:0046914 | transition metal ion binding                | 0.015                  |
|         | GO:0004532 | exoribonuclease activity                    | 0.017                  |
|         | GO:0008094 | DNA-dependent ATPase activity               | 0.017                  |
|         | GO:0016796 | exonuclease activity, active with either... | 0.017                  |
|         | GO:0003755 | peptidyl-prolyl cis-trans isomerase acti... | 0.023                  |
|         | GO:0004527 | exonuclease activity                        | 0.023                  |
|         | GO:0016859 | cis-trans isomerase activity                | 0.023                  |
| MF      |            |                                             | Continued on next page |



| GO type | GO ID      | Description                                 | Adj. p-value |
|---------|------------|---------------------------------------------|--------------|
|         | GO:0016817 | hydrolase activity, acting on acid anhyd... | 0.030        |
|         | GO:0003684 | damaged DNA binding                         | 0.034        |
|         | GO:0017111 | nucleoside-triphosphatase activity          | 0.034        |
|         | GO:0032549 | ribonucleoside binding                      | 0.037        |
|         | GO:0001882 | nucleoside binding                          | 0.042        |
|         | GO:0008170 | N-methyltransferase activity                | 0.047        |
|         | GO:0003725 | double-stranded RNA binding                 | 0.052        |
|         | GO:0042162 | telomeric DNA binding                       | 0.052        |
|         | GO:0000049 | tRNA binding                                | 0.053        |
|         | GO:0016462 | pyrophosphatase activity                    | 0.053        |
|         | GO:0008276 | protein methyltransferase activity          | 0.054        |
|         | GO:0016818 | hydrolase activity, acting on acid anhyd... | 0.054        |
|         | GO:0042802 | identical protein binding                   | 0.054        |
|         | GO:0000988 | transcription factor activity, protein b... | 0.054        |
|         | GO:0001883 | purine nucleoside binding                   | 0.054        |
|         | GO:0005525 | GTP binding                                 | 0.054        |
|         | GO:0016891 | endoribonuclease activity, producing 5'-... | 0.054        |
|         | GO:0019001 | guanyl nucleotide binding                   | 0.054        |
|         | GO:0032550 | purine ribonucleoside binding               | 0.054        |
|         | GO:0032561 | guanyl ribonucleotide binding               | 0.054        |
|         | GO:0000175 | 3'-5'-exoribonuclease activity              | 0.064        |
|         | GO:0004525 | ribonuclease III activity                   | 0.066        |
|         | GO:0032296 | double-stranded RNA-specific ribonucleas... | 0.066        |
|         | GO:0003747 | translation release factor activity         | 0.067        |
|         | GO:0008079 | translation termination factor activity     | 0.067        |
|         | GO:0008198 | ferrous iron binding                        | 0.067        |
|         | GO:0030983 | mismatched DNA binding                      | 0.067        |
|         | GO:0003712 | transcription cofactor activity             | 0.070        |
|         | GO:0001056 | RNA polymerase III activity                 | 0.098        |
